# Supplementary material for: Spatial-temporal profiling of prodiginines and serratamolides produced by endophytic Serratia marcescens harbored in Maytenus serrata
Source: PubMed Central journal article supplement (PMC5869619; doi:10.1038/s41598-018-23538-5), 2018-03-27
Supplement: 41598_2018_23538_MOESM1_ESM.pdf [file 41598_2018_23538_MOESM1_ESM.pdf]

**ELECTRONIC SUPPLEMENTARY INFORMATION**

**Spatial-temporal profiling of prodiginines and serratamolides  
produced by endophytic *Serratia marcescens* harbored in  
*Maytenus serrata***

Dennis Eckelmann, Michael Spiteller, Souvik Kusari\*

## TABLE OF CONTENTS

### I. SUPPLEMENTARY FIGURES

**Fig. S1.** HRMS<sup>2</sup> of 2-methyl-3-propyl prodiginine (compound **1** [M+H]<sup>+</sup>: *m/z* 296, C<sub>18</sub>H<sub>22</sub>N<sub>3</sub>O).

**Fig. S2.** HRMS<sup>2</sup> of 2-methyl-3-butyl prodiginine (compound **2** [M+H]<sup>+</sup>: *m/z* 310, C<sub>19</sub>H<sub>24</sub>N<sub>3</sub>O).

**Fig. S3.** HRMS<sup>2</sup> of prodigiosin (compound **3** [M+H]<sup>+</sup>: *m/z* 324, C<sub>20</sub>H<sub>26</sub>N<sub>3</sub>O).

**Fig. S4.** HRMS<sup>2</sup> of 2-methyl-3-hexyl prodiginine (compound **4** [M+H]<sup>+</sup>: *m/z* 338, C<sub>21</sub>H<sub>28</sub>N<sub>3</sub>O).

**Fig. S5.** HRMS<sup>2</sup> of 2-methyl-3-heptyl prodiginine (compound **5** [M+H]<sup>+</sup>: *m/z* 352, C<sub>22</sub>H<sub>30</sub>N<sub>3</sub>O).

**Fig. S6.** HRMS<sup>2</sup> of 2-methyl-3-octyl prodiginine (compound **6** [M+H]<sup>+</sup>: *m/z* 366, C<sub>23</sub>H<sub>32</sub>N<sub>3</sub>O).

**Fig. S7.** HRMS<sup>2</sup> of 2-methyl-3-nonyl prodiginine (compound **7** [M+H]<sup>+</sup>: *m/z* 380, C<sub>24</sub>H<sub>34</sub>N<sub>3</sub>O).

**Fig. S8.** HRMS<sup>3</sup> of 2-methyl-3-propyl prodiginine (compound **1** [M+H]<sup>+</sup>: *m/z* 296 via 281).

**Fig. S9.** HRMS<sup>3</sup> of 2-methyl-3-butyl prodiginine (compound **2** [M+H]<sup>+</sup>: *m/z* 310 via 295).

**Fig. S10.** HRMS<sup>3</sup> of prodigiosin (compound **3** [M+H]<sup>+</sup>: *m/z* 324 via 309).

**Fig. S11.** HRMS<sup>3</sup> of 2-methyl-3-hexyl prodiginine (compound **4** [M+H]<sup>+</sup>: *m/z* 338 via 323).

**Fig. S12.** HRMS<sup>3</sup> of 2-methyl-3-heptyl prodiginine (compound **5** [M+H]<sup>+</sup>: *m/z* 352 via 337).

**Fig. S13.** HRMS<sup>3</sup> of 2-methyl-3-octyl prodiginine (compound **6** [M+H]<sup>+</sup>: *m/z* 366 via 351).

**Fig. S14.** HRMS<sup>3</sup> of 2-methyl-3-nonyl prodiginine (compound **7** [M+H]<sup>+</sup>: *m/z* 380 via 365).

**Fig. S15.** Proposed mass spectral fragmentation pathway of 2-methyl-3-propyl prodiginine (compound **1** [M+H]<sup>+</sup>: *m/z* 296, C<sub>18</sub>H<sub>22</sub>N<sub>3</sub>O).

**Fig. S16.** Proposed mass spectral fragmentation pathway of 2-methyl-3-butyl prodiginine (compound **2** [M+H]<sup>+</sup>: *m/z* 310, C<sub>19</sub>H<sub>24</sub>N<sub>3</sub>O).

**Fig. S17.** Proposed mass spectral fragmentation pathway of prodigiosin (compound **3** [M+H]<sup>+</sup>: *m/z* 324, C<sub>20</sub>H<sub>26</sub>N<sub>3</sub>O).

**Fig. S18.** Proposed mass spectral fragmentation pathway of 2-methyl-3-hexyl prodiginine (compound **4** [M+H]<sup>+</sup>: *m/z* 338, C<sub>21</sub>H<sub>28</sub>N<sub>3</sub>O).

**Fig. S19.** Proposed mass spectral fragmentation pathway of 2-methyl-3-heptyl prodiginine (compound **5**  $[M+H]^+$ :  $m/z$  352,  $C_{22}H_{30}N_3O$ ).

**Fig. S20.** Proposed mass spectral fragmentation pathway of 2-methyl-3-octyl prodiginine (compound **6**  $[M+H]^+$ :  $m/z$  366,  $C_{23}H_{32}N_3O$ ).

**Fig. S21.** Proposed mass spectral fragmentation pathway of 2-methyl-3-nonyl prodiginine (compound **7**  $[M+H]^+$ :  $m/z$  380,  $C_{24}H_{34}N_3O$ ).

**Fig. S22.** HPLC-HRMS analysis of prodiginines (**1-7**). TIC, extracted ion chromatograms of prodiginines, and area in comparison to the main metabolite prodigiosin.

**Fig. S23.** HPLC-HRMS analysis of serratamolides (**8-14**). TIC, extracted ion chromatograms of serratamolides, and area in comparison to the main metabolite serrawettin W1.

**Fig. S24.** HPLC-HRMS analysis of serratamolides (**15-19**). TIC, extracted ion chromatograms of serratamolides, and area in comparison to the main metabolite serrawettin W1\*.

**Fig. S25.** HPLC-HRMS analysis of serratamolides (**20-25**). TIC, extracted ion chromatograms of serratamolides, and area in comparison to the main metabolite serrawettin W1\*.

**Fig. S26.** HPLC-HRMS analysis of serratamolides (**26-30**). TIC, extracted ion chromatograms of serratamolides, and area in comparison to the main metabolite serrawettin W1\*.

**Fig. S27.** HPLC-HRMS analysis of serratamolides (**31-33**). TIC, extracted ion chromatograms of serratamolides, and area in comparison to the main metabolite serrawettin W1\*.

**Fig. S28.** HRMS<sup>2</sup> of serratamolide  $C_8+C_{10}$  (compound **8**  $[M+H]^+$ :  $m/z$  487,  $C_{24}H_{43}N_2O_8$ ).

**Fig. S29.** Proposed mass spectral fragmentation pathway of serratamolide  $C_8+C_{10}$  (compound **8**  $[M+H]^+$ :  $m/z$  487,  $C_{24}H_{43}N_2O_8$ ).

**Fig. S30.** HRMS<sup>2</sup> of serratamolide  $C_9+C_{10}$  (compound **9**  $[M+H]^+$ :  $m/z$  501,  $C_{25}H_{45}N_2O_8$ ).

**Fig. S31.** Proposed mass spectral fragmentation pathway of serratamolide  $C_9+C_{10}$  (compound **9**  $[M+H]^+$ :  $m/z$  501,  $C_{25}H_{45}N_2O_8$ ).

**Fig. S32.** HRMS<sup>2</sup> of serrawettin W1 / serratamolide  $C_{10}+C_{10}$  (compound **10**  $[M+H]^+$ :  $m/z$  515,  $C_{26}H_{47}N_2O_8$ ).

**Fig. S33.** Proposed mass spectral fragmentation pathway of serrawettin W1 / serratamolide C<sub>10</sub>+C<sub>10</sub> (compound **10** [M+H]<sup>+</sup>: *m/z* 515, C<sub>26</sub>H<sub>47</sub>N<sub>2</sub>O<sub>8</sub>).

**Fig. S34.** HRMS<sup>2</sup> of serratamolide C<sub>10</sub>+C<sub>11</sub> (compound **11** [M+H]<sup>+</sup>: *m/z* 529, C<sub>27</sub>H<sub>49</sub>N<sub>2</sub>O<sub>8</sub>).

**Fig. S35.** Proposed mass spectral fragmentation pathway of serratamolide C<sub>10</sub>+C<sub>11</sub> (compound **11** [M+H]<sup>+</sup>: *m/z* 529, C<sub>27</sub>H<sub>49</sub>N<sub>2</sub>O<sub>8</sub>).

**Fig. S36.** HRMS<sup>2</sup> of serratamolide C<sub>10</sub>+C<sub>12</sub> (compound **12** [M+H]<sup>+</sup>: *m/z* 543, C<sub>28</sub>H<sub>51</sub>N<sub>2</sub>O<sub>8</sub>).

**Fig. S37.** Proposed mass spectral fragmentation pathway of serratamolide C<sub>10</sub>+C<sub>12</sub> (compound **12** [M+H]<sup>+</sup>: *m/z* 543, C<sub>28</sub>H<sub>51</sub>N<sub>2</sub>O<sub>8</sub>).

**Fig. S38.** HRMS<sup>2</sup> of serratamolide C<sub>11</sub>+C<sub>12</sub> (compound **13** [M+H]<sup>+</sup>: *m/z* 557, C<sub>29</sub>H<sub>53</sub>N<sub>2</sub>O<sub>8</sub>).

**Fig. S39.** Proposed mass spectral fragmentation pathway of serratamolide C<sub>11</sub>+C<sub>12</sub> (compound **13** [M+H]<sup>+</sup>: *m/z* 557, C<sub>29</sub>H<sub>53</sub>N<sub>2</sub>O<sub>8</sub>).

**Fig. S40.** HRMS<sup>2</sup> of serratamolide C<sub>12</sub>+C<sub>12</sub> (compound **14** [M+H]<sup>+</sup>: *m/z* 571, C<sub>30</sub>H<sub>55</sub>N<sub>2</sub>O<sub>8</sub>).

**Fig. S41.** Proposed mass spectral fragmentation pathway of serratamolide C<sub>12</sub>+C<sub>12</sub> (compound **14** [M+H]<sup>+</sup>: *m/z* 571, C<sub>30</sub>H<sub>55</sub>N<sub>2</sub>O<sub>8</sub>).

**Fig. S42.** HRMS<sup>2</sup> of serratamolide C<sub>8</sub>+C<sub>12:1</sub> (compound **15** [M+H]<sup>+</sup>: *m/z* 513, C<sub>26</sub>H<sub>45</sub>N<sub>2</sub>O<sub>8</sub>).

**Fig. S43.** Proposed mass spectral fragmentation pathway of serratamolide C<sub>8</sub>+C<sub>12:1</sub> (compound **15** [M+H]<sup>+</sup>: *m/z* 513, C<sub>26</sub>H<sub>45</sub>N<sub>2</sub>O<sub>8</sub>).

**Fig. S44.** HRMS<sup>2</sup> of serratamolide C<sub>10</sub>+C<sub>11:1</sub> (compound **16** [M+H]<sup>+</sup>: *m/z* 527, C<sub>27</sub>H<sub>47</sub>N<sub>2</sub>O<sub>8</sub>).

**Fig. S45.** Proposed mass spectral fragmentation pathway of serratamolide C<sub>10</sub>+C<sub>11:1</sub> (compound **16** [M+H]<sup>+</sup>: *m/z* 527, C<sub>27</sub>H<sub>47</sub>N<sub>2</sub>O<sub>8</sub>).

**Fig. S46.** HRMS<sup>2</sup> of serratamolide C<sub>10</sub>+C<sub>12:1</sub> (compound **17** [M+H]<sup>+</sup>: *m/z* 541, C<sub>28</sub>H<sub>49</sub>N<sub>2</sub>O<sub>8</sub>).

**Fig. S47.** Proposed mass spectral fragmentation pathway of serratamolide C<sub>10</sub>+C<sub>12:1</sub> (compound **17** [M+H]<sup>+</sup>: *m/z* 541, C<sub>28</sub>H<sub>49</sub>N<sub>2</sub>O<sub>8</sub>).

**Fig. S48.** HRMS<sup>2</sup> of serratamolide C<sub>11</sub>+C<sub>12:1</sub> (compound **18** [M+H]<sup>+</sup>: *m/z* 555, C<sub>29</sub>H<sub>51</sub>N<sub>2</sub>O<sub>8</sub>).

**Fig. S49.** Proposed mass spectral fragmentation pathway of serratamolide C<sub>11</sub>+C<sub>12:1</sub> (compound **18** [M+H]<sup>+</sup>: *m/z* 555, C<sub>29</sub>H<sub>51</sub>N<sub>2</sub>O<sub>8</sub>).

**Fig. S50.** HRMS<sup>2</sup> of serratamolide C<sub>12</sub>+C<sub>12:1</sub> (compound **19** [M+H]<sup>+</sup>: *m/z* 569, C<sub>30</sub>H<sub>53</sub>N<sub>2</sub>O<sub>8</sub>).

**Fig. S51.** Proposed mass spectral fragmentation pathway of serratamolide C<sub>12</sub>+C<sub>12:1</sub> (compound **19** [M+H]<sup>+</sup>: *m/z* 569, C<sub>30</sub>H<sub>53</sub>N<sub>2</sub>O<sub>8</sub>).

**Fig. S52.** HRMS<sup>2</sup> of ring-opened serratamolide C<sub>10</sub>+C<sub>10</sub> (compound **20** [M+H]<sup>+</sup>: *m/z* 533, C<sub>26</sub>H<sub>49</sub>N<sub>2</sub>O<sub>9</sub>).

**Fig. S53.** Proposed mass spectral fragmentation pathway of ring-opened serratamolide C<sub>10</sub>+C<sub>10</sub> (compound **20** [M+H]<sup>+</sup>: *m/z* 533, C<sub>26</sub>H<sub>49</sub>N<sub>2</sub>O<sub>9</sub>).

**Fig. S54.** HRMS<sup>2</sup> of ring-opened serratamolide C<sub>10</sub>+C<sub>11</sub> (compound **21** [M+H]<sup>+</sup>: *m/z* 547, C<sub>27</sub>H<sub>51</sub>N<sub>2</sub>O<sub>9</sub>).

**Fig. S55.** Proposed mass spectral fragmentation pathway of ring-opened serratamolide C<sub>10</sub>+C<sub>11</sub> (compound **21** [M+H]<sup>+</sup>: *m/z* 547, C<sub>27</sub>H<sub>51</sub>N<sub>2</sub>O<sub>9</sub>).

**Fig. S56.** HRMS<sup>2</sup> of ring-opened serratamolide C<sub>10</sub>+C<sub>12</sub> (compound **22** [M+H]<sup>+</sup>: *m/z* 561, C<sub>28</sub>H<sub>53</sub>N<sub>2</sub>O<sub>9</sub>).

**Fig. S57.** Proposed mass spectral fragmentation pathway of ring-opened serratamolide C<sub>10</sub>+C<sub>12</sub> (compound **22** [M+H]<sup>+</sup>: *m/z* 561, C<sub>28</sub>H<sub>53</sub>N<sub>2</sub>O<sub>9</sub>).

**Fig. S58.** HRMS<sup>2</sup> of ring-opened serratamolide C<sub>10</sub>+C<sub>12:1</sub> (compound **23** [M+H]<sup>+</sup>: *m/z* 559, C<sub>28</sub>H<sub>51</sub>N<sub>2</sub>O<sub>9</sub>).

**Fig. S59.** Proposed mass spectral fragmentation pathway of ring-opened serratamolide C<sub>10</sub>+C<sub>12:1</sub> (compound **23** [M+H]<sup>+</sup>: *m/z* 559, C<sub>28</sub>H<sub>51</sub>N<sub>2</sub>O<sub>9</sub>).

**Fig. S60.** HRMS<sup>2</sup> of ring-opened serratamolide C<sub>9</sub>+C<sub>10</sub> (compound **24** [M+H]<sup>+</sup>: *m/z* 519, C<sub>25</sub>H<sub>47</sub>N<sub>2</sub>O<sub>9</sub>).

**Fig. S61.** Proposed mass spectral fragmentation pathway of ring-opened serratamolide C<sub>9</sub>+C<sub>10</sub> (compound **24** [M+H]<sup>+</sup>: *m/z* 519, C<sub>25</sub>H<sub>47</sub>N<sub>2</sub>O<sub>9</sub>).

**Fig. S62.** HRMS<sup>2</sup> of ring-opened serratamolide C<sub>10</sub>+C<sub>13</sub> (compound **25** [M+H]<sup>+</sup>: *m/z* 575, C<sub>29</sub>H<sub>55</sub>N<sub>2</sub>O<sub>9</sub>).

**Fig. S63.** Proposed mass spectral fragmentation pathway of ring-opened serratamolide C<sub>10</sub>+C<sub>13</sub> (compound **25** [M+H]<sup>+</sup>: *m/z* 575, C<sub>29</sub>H<sub>55</sub>N<sub>2</sub>O<sub>9</sub>).

**Fig. S64.** HRMS<sup>2</sup> of ring-opened serratamolide C<sub>12</sub>+C<sub>12</sub> (compound **26** [M+H]<sup>+</sup>: *m/z* 589, C<sub>30</sub>H<sub>57</sub>N<sub>2</sub>O<sub>9</sub>).

**Fig. S65.** Proposed mass spectral fragmentation pathway of ring-opened serratamolide C<sub>12</sub>+C<sub>12</sub> (compound **26** [M+H]<sup>+</sup>: *m/z* 589, C<sub>30</sub>H<sub>57</sub>N<sub>2</sub>O<sub>9</sub>).

**Fig. S66.** HRMS<sup>2</sup> of ring-opened serratamolide C<sub>12</sub>+C<sub>13</sub> (compound **27** [M+H]<sup>+</sup>: *m/z* 603, C<sub>31</sub>H<sub>59</sub>N<sub>2</sub>O<sub>9</sub>).

**Fig. S67.** Proposed mass spectral fragmentation pathway of ring-opened serratamolide C<sub>12</sub>+C<sub>13</sub> (compound **27** [M+H]<sup>+</sup>: *m/z* 603, C<sub>31</sub>H<sub>59</sub>N<sub>2</sub>O<sub>9</sub>).

**Fig. S68.** HRMS<sup>2</sup> of ring-opened serratamolide C<sub>10</sub>+C<sub>13:1</sub> (compound **28** [M+H]<sup>+</sup>: *m/z* 573, C<sub>29</sub>H<sub>53</sub>N<sub>2</sub>O<sub>9</sub>).

**Fig. S69.** HRMS<sup>2</sup> of ring-opened serratamolide C<sub>12</sub>+C<sub>12:1</sub> (compound **29** [M+H]<sup>+</sup>: *m/z* 587, C<sub>30</sub>H<sub>55</sub>N<sub>2</sub>O<sub>9</sub>).

**Fig. S70.** HRMS<sup>2</sup> of ring-opened serratamolide C<sub>13</sub>+C<sub>12:1</sub> (compound **30** [M+H]<sup>+</sup>: *m/z* 601, C<sub>31</sub>H<sub>57</sub>N<sub>2</sub>O<sub>9</sub>).

**Fig. S71.** HRMS<sup>2</sup> of serratamic acid (N-(D-3-hydroxydecanoyl)-L-serine, compound **31** [M+H]<sup>+</sup>: *m/z* 276, C<sub>13</sub>H<sub>26</sub>NO<sub>5</sub>).

**Fig. S72.** HRMS<sup>3</sup> of serratamic acid (N-(D-3-hydroxydecanoyl)-L-serine, compound **31** [M+H]<sup>+</sup>: *m/z* 276 via 258).

**Fig. S73.** Proposed mass spectral fragmentation pathway of serratamic acid (N-(D-3-hydroxydecanoyl)-L-serine, compound **31** [M+H]<sup>+</sup>: *m/z* 276, C<sub>13</sub>H<sub>26</sub>NO<sub>5</sub>).

**Fig. S74.** HRMS<sup>2</sup> of serratamic acid derivative (hydroxydodecanoyl-serine, compound **32** [M+H]<sup>+</sup>: *m/z* 304, C<sub>15</sub>H<sub>30</sub>NO<sub>5</sub>).

**Fig. S75.** HRMS<sup>3</sup> of serratamic acid derivative (hydroxydodecanoyl-serine, compound **32** [M+H]<sup>+</sup>: *m/z* 304 via 286).

**Fig. S76.** Proposed mass spectral fragmentation pathway of serratamic acid derivative (hydroxydodecanoyl-serine, compound **32** [M+H]<sup>+</sup>: *m/z* 304, C<sub>15</sub>H<sub>30</sub>NO<sub>5</sub>).

**Fig. S77.** HRMS<sup>2</sup> of serratamic acid derivative with double bond (hydroxydodecenoyl-serine, compound **33** [M+H]<sup>+</sup>: *m/z* 302, C<sub>15</sub>H<sub>28</sub>NO<sub>5</sub>).

**Fig. S78.** HRMS<sup>3</sup> of of serratamic acid derivative with double bond (hydroxydodecenoyl-serine, compound **33** [M+H]<sup>+</sup>: *m/z* 302 via 284).

**Fig. S79.** Proposed mass spectral fragmentation pathway of serratamic acid derivative with double bond (hydroxydodecenoyl-serine, compound **33** [M+H]<sup>+</sup>: *m/z* 302, C<sub>15</sub>H<sub>28</sub>NO<sub>5</sub>).

**Fig. S80.** <sup>1</sup>H-NMR spectrum of serrawettin W1 / serratamolide C<sub>10</sub>+C<sub>10</sub> (compound **10**, CDCl<sub>3</sub>, 600 MHz).

**Fig. S81.** <sup>13</sup>C-NMR spectrum of serrawettin W1 / serratamolide C<sub>10</sub>+C<sub>10</sub> (compound **10**, CDCl<sub>3</sub>, 150 MHz).

**Fig. S82.** COSY NMR spectrum of serrawettin W1 / serratamolide C<sub>10</sub>+C<sub>10</sub> (compound **10**, CDCl<sub>3</sub>).

**Fig. S83.** HSQC NMR spectrum of serrawettin W1 / serratamolide C<sub>10</sub>+C<sub>10</sub> (compound **10**, CDCl<sub>3</sub>).

**Fig. S84.** HMBC NMR spectrum of serrawettin W1 / serratamolide C<sub>10</sub>+C<sub>10</sub> (compound **10**, CDCl<sub>3</sub>).

**Fig. S85.** <sup>1</sup>H-NMR spectrum of serratamic acid (N-(D-3-hydroxydecanoyl)-L-serine, compound **31**, MeOD, 700 MHz).

**Fig. S86.** <sup>13</sup>C-NMR spectrum of serratamic acid (N-(D-3-hydroxydecanoyl)-L-serine, compound **31**, MeOD, 175 MHz).

**Fig. S87.** COSY NMR spectrum of serratamic acid (N-(D-3-hydroxydecanoyl)-L-serine, compound **31**, MeOD).

**Fig. S88.** HSQC NMR spectrum of serratamic acid (N-(D-3-hydroxydecanoyl)-L-serine, compound **31**, MeOD).

**Fig. S89.** HMBC NMR spectrum of serratamic acid (N-(D-3-hydroxydecanoyl)-L-serine, compound **31**, MeOD).

**Fig. S90.** <sup>1</sup>H-NMR spectrum of prodigiosin (compound **3**, CDCl<sub>3</sub>, 600 MHz).

**Fig. S91.** COSY NMR spectrum of prodigiosin (compound **3**, CDCl<sub>3</sub>, 600 MHz).

**Fig. S92.** HRMS spectra of 2-methyl-3-propyl prodiginine (compound **1** [M+H]<sup>+</sup>: *m/z* 296, C<sub>18</sub>H<sub>22</sub>N<sub>3</sub>O).

**Fig. S93.** HRMS spectra of 2-methyl-3-butyl prodiginine (compound **2** [M+H]<sup>+</sup>: *m/z* 310, C<sub>19</sub>H<sub>24</sub>N<sub>3</sub>O).

**Fig. S94.** HRMS spectra of prodigiosin (compound **3** [M+H]<sup>+</sup>: *m/z* 324, C<sub>20</sub>H<sub>26</sub>N<sub>3</sub>O).

**Fig. S95.** HRMS spectra of 2-methyl-3-hexyl prodiginine (compound **4** [M+H]<sup>+</sup>: *m/z* 338, C<sub>21</sub>H<sub>28</sub>N<sub>3</sub>O).

**Fig. S96.** HRMS spectra of 2-methyl-3-heptyl prodiginine (compound **5** [M+H]<sup>+</sup>: *m/z* 352, C<sub>22</sub>H<sub>30</sub>N<sub>3</sub>O).

**Fig. S97.** HRMS spectra of 2-methyl-3-octyl prodiginine (compound **6** [M+H]<sup>+</sup>: *m/z* 366, C<sub>23</sub>H<sub>32</sub>N<sub>3</sub>O).

**Fig. S98.** HRMS spectra of 2-methyl-3-nonyl prodiginine (compound **7** [M+H]<sup>+</sup>: *m/z* 380, C<sub>24</sub>H<sub>34</sub>N<sub>3</sub>O).

**Fig. S99.** HRMS spectra of 2-methyl-3-propyl prodiginine with incorporated <sup>15</sup>N derived from <sup>15</sup>NH<sub>4</sub>Cl (compound **1** [M+H]<sup>+</sup>: *m/z* 297, C<sub>18</sub>H<sub>22</sub>N<sub>2</sub><sup>15</sup>NO).

**Fig. S100.** HRMS spectra of 2-methyl-3-butyl prodiginine with incorporated <sup>15</sup>N derived from <sup>15</sup>NH<sub>4</sub>Cl (compound **2** [M+H]<sup>+</sup>: *m/z* 311, C<sub>19</sub>H<sub>24</sub>N<sub>2</sub><sup>15</sup>NO).

**Fig. S101.** HRMS spectra of prodigiosin with incorporated <sup>15</sup>N derived from <sup>15</sup>NH<sub>4</sub>Cl (compound **3** [M+H]<sup>+</sup>: *m/z* 325, C<sub>20</sub>H<sub>26</sub>N<sub>2</sub><sup>15</sup>NO).

**Fig. S102.** HRMS spectra of 2-methyl-3-hexyl prodiginine with incorporated <sup>15</sup>N derived from <sup>15</sup>NH<sub>4</sub>Cl (compound **4** [M+H]<sup>+</sup>: *m/z* 339, C<sub>21</sub>H<sub>28</sub>N<sub>2</sub><sup>15</sup>NO).

**Fig. S103.** HRMS spectra of 2-methyl-3-heptyl prodiginine with incorporated <sup>15</sup>N derived from <sup>15</sup>NH<sub>4</sub>Cl (compound **5** [M+H]<sup>+</sup>: *m/z* 353, C<sub>22</sub>H<sub>30</sub>N<sub>2</sub><sup>15</sup>NO).

**Fig. S104.** HRMS spectra of 2-methyl-3-nonyl prodiginine with incorporated <sup>15</sup>N derived from <sup>15</sup>NH<sub>4</sub>Cl (compound **7** [M+H]<sup>+</sup>: *m/z* 381, C<sub>24</sub>H<sub>34</sub>N<sub>2</sub><sup>15</sup>NO).

**Fig. S105.** HRMS spectra of 2-methyl-3-propyl prodiginine with incorporated methyl-D<sub>3</sub> group derived from [methyl-D<sub>3</sub>]-L-methionine (compound **1** [M+H]<sup>+</sup>: *m/z* 299, C<sub>18</sub>H<sub>19</sub>D<sub>3</sub>N<sub>3</sub>O).



**Fig. S106.** HRMS spectra of 2-methyl-3-butyl prodiginine with incorporated methyl-D<sub>3</sub> group derived from [methyl-D<sub>3</sub>]-L-methionine (compound **2** [M+H]<sup>+</sup>: *m/z* 313, C<sub>19</sub>H<sub>21</sub>D<sub>3</sub>N<sub>3</sub>O).

**Fig. S107.** HRMS spectra of prodigiosin with incorporated methyl-D<sub>3</sub> group derived from [methyl-D<sub>3</sub>]-L-methionine (compound **3** [M+H]<sup>+</sup>: *m/z* 327, C<sub>20</sub>H<sub>23</sub>D<sub>3</sub>N<sub>3</sub>O).

**Fig. S108.** HRMS spectra of 2-methyl-3-hexyl prodiginine with incorporated methyl-D<sub>3</sub> group derived from [methyl-D<sub>3</sub>]-L-methionine (compound **4** [M+H]<sup>+</sup>: *m/z* 341, C<sub>21</sub>H<sub>25</sub>D<sub>3</sub>N<sub>3</sub>O).

**Fig. S109.** HRMS spectra of 2-methyl-3-heptyl prodiginine with incorporated methyl-D<sub>3</sub> group derived from [methyl-D<sub>3</sub>]-L-methionine (compound **5** [M+H]<sup>+</sup>: *m/z* 355, C<sub>22</sub>H<sub>27</sub>D<sub>3</sub>N<sub>3</sub>O).

**Fig. S110.** HRMS spectra of 2-methyl-3-nonyl prodiginine with incorporated methyl-D<sub>3</sub> group derived from [methyl-D<sub>3</sub>]-L-methionine (compound **7** [M+H]<sup>+</sup>: *m/z* 383, C<sub>24</sub>H<sub>31</sub>D<sub>3</sub>N<sub>3</sub>O).

**Fig. S111.** HRMS spectra of 2-methyl-3-propyl prodiginine with incorporated [1-<sup>13</sup>C]-L-proline (compound **1** [M+H]<sup>+</sup>: *m/z* 297, C<sub>17</sub><sup>13</sup>CH<sub>22</sub>N<sub>3</sub>O).

**Fig. S112.** HRMS spectra of 2-methyl-3-butyl prodiginine with incorporated [1-<sup>13</sup>C]-L-proline (compound **2** [M+H]<sup>+</sup>: *m/z* 311, C<sub>18</sub><sup>13</sup>CH<sub>24</sub>N<sub>3</sub>O).

**Fig. S113.** HRMS spectra of prodigiosin with incorporated [1-<sup>13</sup>C]-L-proline (compound **3** [M+H]<sup>+</sup>: *m/z* 325, C<sub>19</sub><sup>13</sup>CH<sub>26</sub>N<sub>3</sub>O).

**Fig. S114.** HRMS spectra of 2-methyl-3-hexyl prodiginine with incorporated [1-<sup>13</sup>C]-L-proline (compound **4** [M+H]<sup>+</sup>: *m/z* 339, C<sub>20</sub><sup>13</sup>CH<sub>28</sub>N<sub>3</sub>O).

**Fig. S115.** HRMS spectra of 2-methyl-3-heptyl prodiginine with incorporated [1-<sup>13</sup>C]-L-proline (compound **5** [M+H]<sup>+</sup>: *m/z* 353, C<sub>21</sub><sup>13</sup>CH<sub>30</sub>N<sub>3</sub>O).

**Fig. S116.** HRMS spectra of 2-methyl-3-nonyl prodiginine with incorporated [1-<sup>13</sup>C]-L-proline (compound **7** [M+H]<sup>+</sup>: *m/z* 381, C<sub>23</sub><sup>13</sup>CH<sub>34</sub>N<sub>3</sub>O).

**Fig. S117.** HRMS<sup>2</sup> of 2-methyl-3-propyl prodiginine with incorporated <sup>15</sup>N derived from <sup>15</sup>NH<sub>4</sub>Cl (compound **1** [M+H]<sup>+</sup>: *m/z* 297, C<sub>18</sub>H<sub>22</sub>N<sub>2</sub><sup>15</sup>NO).

**Fig. S118.** HRMS<sup>2</sup> of 2-methyl-3-butyl prodiginine with incorporated <sup>15</sup>N derived from <sup>15</sup>NH<sub>4</sub>Cl (compound **2** [M+H]<sup>+</sup>: *m/z* 311, C<sub>19</sub>H<sub>24</sub>N<sub>2</sub><sup>15</sup>NO).

**Fig. S119.** HRMS<sup>2</sup> of prodigiosin with incorporated <sup>15</sup>N derived from <sup>15</sup>NH<sub>4</sub>Cl (compound **3** [M+H]<sup>+</sup>: *m/z* 325, C<sub>20</sub>H<sub>26</sub>N<sub>2</sub><sup>15</sup>NO).

**Fig. S120.** HRMS<sup>2</sup> of 2-methyl-3-hexyl prodiginine with incorporated <sup>15</sup>N derived from <sup>15</sup>NH<sub>4</sub>Cl (compound **4** [M+H]<sup>+</sup>: *m/z* 339, C<sub>21</sub>H<sub>28</sub>N<sub>2</sub><sup>15</sup>NO).

**Fig. S121.** HRMS<sup>2</sup> of 2-methyl-3-heptyl prodiginine with incorporated <sup>15</sup>N derived from <sup>15</sup>NH<sub>4</sub>Cl (compound **5** [M+H]<sup>+</sup>: *m/z* 353, C<sub>22</sub>H<sub>30</sub>N<sub>2</sub><sup>15</sup>NO).

**Fig. S122.** HRMS<sup>2</sup> of 2-methyl-3-nonyl prodiginine with incorporated <sup>15</sup>N derived from <sup>15</sup>NH<sub>4</sub>Cl (compound **7** [M+H]<sup>+</sup>: *m/z* 381, C<sub>24</sub>H<sub>34</sub>N<sub>2</sub><sup>15</sup>NO).

**Fig. S123.** HRMS<sup>3</sup> of 2-methyl-3-propyl prodiginine with incorporated <sup>15</sup>N derived from <sup>15</sup>NH<sub>4</sub>Cl (compound **1** [M+H]<sup>+</sup>: *m/z* 297 via 272, C<sub>18</sub>H<sub>22</sub>N<sub>2</sub><sup>15</sup>NO).

**Fig. S124.** HRMS<sup>3</sup> of 2-methyl-3-butyl prodiginine with incorporated <sup>15</sup>N derived from <sup>15</sup>NH<sub>4</sub>Cl (compound **2** [M+H]<sup>+</sup>: *m/z* 311 via 296, C<sub>19</sub>H<sub>24</sub>N<sub>2</sub><sup>15</sup>NO).

**Fig. S125.** HRMS<sup>3</sup> of prodigiosin with incorporated <sup>15</sup>N derived from <sup>15</sup>NH<sub>4</sub>Cl (compound **3** [M+H]<sup>+</sup>: *m/z* 325 via 310, C<sub>20</sub>H<sub>26</sub>N<sub>2</sub><sup>15</sup>NO).

**Fig. S126.** HRMS<sup>3</sup> of 2-methyl-3-hexyl prodiginine with incorporated <sup>15</sup>N derived from <sup>15</sup>NH<sub>4</sub>Cl (compound **4** [M+H]<sup>+</sup>: *m/z* 339 via 324, C<sub>21</sub>H<sub>28</sub>N<sub>2</sub><sup>15</sup>NO).

**Fig. S127.** HRMS<sup>3</sup> of 2-methyl-3-heptyl prodiginine with incorporated <sup>15</sup>N derived from <sup>15</sup>NH<sub>4</sub>Cl (compound **5** [M+H]<sup>+</sup>: *m/z* 353 via 338, C<sub>22</sub>H<sub>30</sub>N<sub>2</sub><sup>15</sup>NO).

**Fig. S128.** HRMS<sup>3</sup> of 2-methyl-3-nonyl prodiginine with incorporated <sup>15</sup>N derived from <sup>15</sup>NH<sub>4</sub>Cl (compound **7** [M+H]<sup>+</sup>: *m/z* 381 via 366, C<sub>24</sub>H<sub>34</sub>N<sub>2</sub><sup>15</sup>NO).

**Fig. S129.** Proposed mass spectral fragmentation pathway of 2-methyl-3-propyl prodiginine with incorporated <sup>15</sup>N derived from <sup>15</sup>NH<sub>4</sub>Cl (compound **1** [M+H]<sup>+</sup>: *m/z* 297, C<sub>18</sub>H<sub>22</sub>N<sub>2</sub><sup>15</sup>NO).

**Fig. S130.** Proposed mass spectral fragmentation pathway of 2-methyl-3-butyl prodiginine with incorporated <sup>15</sup>N derived from <sup>15</sup>NH<sub>4</sub>Cl (compound **2** [M+H]<sup>+</sup>: *m/z* 311, C<sub>19</sub>H<sub>24</sub>N<sub>2</sub><sup>15</sup>NO).

**Fig. S131.** Proposed mass spectral fragmentation pathway of prodigiosin with incorporated <sup>15</sup>N derived from <sup>15</sup>NH<sub>4</sub>Cl (compound **3** [M+H]<sup>+</sup>: *m/z* 325, C<sub>20</sub>H<sub>26</sub>N<sub>2</sub><sup>15</sup>NO).

**Fig. S132.** Proposed mass spectral fragmentation pathway of 2-methyl-3-hexyl prodiginine with incorporated <sup>15</sup>N derived from <sup>15</sup>NH<sub>4</sub>Cl (compound **4** [M+H]<sup>+</sup>: *m/z* 339, C<sub>21</sub>H<sub>28</sub>N<sub>2</sub><sup>15</sup>NO).

**Fig. S133.** Proposed mass spectral fragmentation pathway of 2-methyl-3-heptyl prodiginine with incorporated <sup>15</sup>N derived from <sup>15</sup>NH<sub>4</sub>Cl (compound **5** [M+H]<sup>+</sup>: *m/z* 353, C<sub>22</sub>H<sub>30</sub>N<sub>2</sub><sup>15</sup>NO).

**Fig. S134.** Proposed mass spectral fragmentation pathway of 2-methyl-3-nonyl prodiginine with incorporated  $^{15}\text{N}$  derived from  $^{15}\text{NH}_4\text{Cl}$  (compound **7**  $[\text{M}+\text{H}]^+$ :  $m/z$  381 via 366,  $\text{C}_{24}\text{H}_{34}\text{N}_2^{15}\text{NO}$ ).

**Fig. S135.** HRMS<sup>2</sup> of 2-methyl-3-propyl prodiginine with incorporated methyl-D<sub>3</sub> group derived from [methyl-D<sub>3</sub>]-L-methionine (compound **1**  $[\text{M}+\text{H}]^+$ :  $m/z$  299,  $\text{C}_{18}\text{H}_{19}\text{D}_3\text{N}_3\text{O}$ ).

**Fig. S136.** HRMS<sup>2</sup> of 2-methyl-3-butyl prodiginine with incorporated methyl-D<sub>3</sub> group derived from [methyl-D<sub>3</sub>]-L-methionine (compound **2**  $[\text{M}+\text{H}]^+$ :  $m/z$  313,  $\text{C}_{19}\text{H}_{21}\text{D}_3\text{N}_3\text{O}$ ).

**Fig. S137.** HRMS<sup>2</sup> of prodigiosin with incorporated methyl-D<sub>3</sub> group derived from [methyl-D<sub>3</sub>]-L-methionine (compound **3**  $[\text{M}+\text{H}]^+$ :  $m/z$  327,  $\text{C}_{20}\text{H}_{23}\text{D}_3\text{N}_3\text{O}$ ).

**Fig. S138.** HRMS<sup>2</sup> of 2-methyl-3-hexyl prodiginine with incorporated methyl-D<sub>3</sub> group derived from [methyl-D<sub>3</sub>]-L-methionine (compound **4**  $[\text{M}+\text{H}]^+$ :  $m/z$  341,  $\text{C}_{21}\text{H}_{25}\text{D}_3\text{N}_3\text{O}$ ).

**Fig. S139.** HRMS<sup>2</sup> of 2-methyl-3-heptyl prodiginine with incorporated methyl-D<sub>3</sub> group derived from [methyl-D<sub>3</sub>]-L-methionine (compound **5**  $[\text{M}+\text{H}]^+$ :  $m/z$  355,  $\text{C}_{22}\text{H}_{27}\text{D}_3\text{N}_3\text{O}$ ).

**Fig. S140.** HRMS<sup>2</sup> of 2-methyl-3-nonyl prodiginine with incorporated methyl-D<sub>3</sub> group derived from [methyl-D<sub>3</sub>]-L-methionine (compound **7**  $[\text{M}+\text{H}]^+$ :  $m/z$  383,  $\text{C}_{24}\text{H}_{31}\text{D}_3\text{N}_3\text{O}$ ).

**Fig. S141.** HRMS<sup>3</sup> of 2-methyl-3-propyl prodiginine with incorporated methyl-D<sub>3</sub> group derived from [methyl-D<sub>3</sub>]-L-methionine (compound **1**  $[\text{M}+\text{H}]^+$ :  $m/z$  299 via 281,  $\text{C}_{18}\text{H}_{19}\text{D}_3\text{N}_3\text{O}$ ).

**Fig. S142.** HRMS<sup>3</sup> of 2-methyl-3-butyl prodiginine with incorporated methyl-D<sub>3</sub> group derived from [methyl-D<sub>3</sub>]-L-methionine (compound **2**  $[\text{M}+\text{H}]^+$ :  $m/z$  313 via 295,  $\text{C}_{19}\text{H}_{21}\text{D}_3\text{N}_3\text{O}$ ).

**Fig. S143.** HRMS<sup>3</sup> of prodigiosin with incorporated methyl-D<sub>3</sub> group derived from [methyl-D<sub>3</sub>]-L-methionine (compound **3**  $[\text{M}+\text{H}]^+$ :  $m/z$  327 via 309,  $\text{C}_{20}\text{H}_{23}\text{D}_3\text{N}_3\text{O}$ ).

**Fig. S144.** HRMS<sup>3</sup> of 2-methyl-3-hexyl prodiginine with incorporated methyl-D<sub>3</sub> group derived from [methyl-D<sub>3</sub>]-L-methionine (compound **4**  $[\text{M}+\text{H}]^+$ :  $m/z$  341 via 323,  $\text{C}_{21}\text{H}_{25}\text{D}_3\text{N}_3\text{O}$ ).

**Fig. S145.** HRMS<sup>3</sup> of 2-methyl-3-heptyl prodiginine with incorporated methyl-D<sub>3</sub> group derived from [methyl-D<sub>3</sub>]-L-methionine (compound **5**  $[\text{M}+\text{H}]^+$ :  $m/z$  355 via 337,  $\text{C}_{22}\text{H}_{27}\text{D}_3\text{N}_3\text{O}$ ).

**Fig. S146.** HRMS<sup>3</sup> of 2-methyl-3-nonyl prodiginine with incorporated methyl-D<sub>3</sub> group derived from [methyl-D<sub>3</sub>]-L-methionine (compound **7** [M+H]<sup>+</sup>: *m/z* 383 via 366, C<sub>24</sub>H<sub>31</sub>D<sub>3</sub>N<sub>3</sub>O).

**Fig. S147.** Proposed mass spectral fragmentation pathway of 2-methyl-3-propyl prodiginine with incorporated methyl-D<sub>3</sub> group derived from [methyl-D<sub>3</sub>]-L-methionine (compound **1** [M+H]<sup>+</sup>: *m/z* 299, C<sub>18</sub>H<sub>19</sub>D<sub>3</sub>N<sub>3</sub>O).

**Fig. S148.** Proposed mass spectral fragmentation pathway of 2-methyl-3-butyl prodiginine with incorporated methyl-D<sub>3</sub> group derived from [methyl-D<sub>3</sub>]-L-methionine (compound **2** [M+H]<sup>+</sup>: *m/z* 313, C<sub>19</sub>H<sub>21</sub>D<sub>3</sub>N<sub>3</sub>O).

**Fig. S149.** Proposed mass spectral fragmentation pathway of prodigiosin with incorporated methyl-D<sub>3</sub> group derived from [methyl-D<sub>3</sub>]-L-methionine (compound **3** [M+H]<sup>+</sup>: *m/z* 327, C<sub>20</sub>H<sub>23</sub>D<sub>3</sub>N<sub>3</sub>O).

**Fig. S150.** Proposed mass spectral fragmentation pathway of 2-methyl-3-hexyl prodiginine with incorporated methyl-D<sub>3</sub> group derived from [methyl-D<sub>3</sub>]-L-methionine (compound **4** [M+H]<sup>+</sup>: *m/z* 341, C<sub>21</sub>H<sub>25</sub>D<sub>3</sub>N<sub>3</sub>O).

**Fig. S151.** Proposed mass spectral fragmentation pathway of 2-methyl-3-heptyl prodiginine with incorporated methyl-D<sub>3</sub> group derived from [methyl-D<sub>3</sub>]-L-methionine (compound **5** [M+H]<sup>+</sup>: *m/z* 355, C<sub>22</sub>H<sub>27</sub>D<sub>3</sub>N<sub>3</sub>O).

**Fig. S152.** Proposed mass spectral fragmentation pathway of 2-methyl-3-nonyl prodiginine with incorporated methyl-D<sub>3</sub> group derived from [methyl-D<sub>3</sub>]-L-methionine (compound **7** [M+H]<sup>+</sup>: *m/z* 383, C<sub>24</sub>H<sub>31</sub>D<sub>3</sub>N<sub>3</sub>O).

**Fig. S153.** HRMS<sup>2</sup> of 2-methyl-3-propyl prodiginine with incorporated [1-<sup>13</sup>C]-L-proline (compound **1** [M+H]<sup>+</sup>: *m/z* 297, C<sub>17</sub><sup>13</sup>CH<sub>22</sub>N<sub>3</sub>O).

**Fig. S154.** HRMS<sup>2</sup> of 2-methyl-3-butyl prodiginine with incorporated [1-<sup>13</sup>C]-L-proline (compound **2** [M+H]<sup>+</sup>: *m/z* 311, C<sub>18</sub><sup>13</sup>CH<sub>24</sub>N<sub>3</sub>O).

**Fig. S155.** HRMS<sup>2</sup> of prodigiosin with incorporated [1-<sup>13</sup>C]-L-proline (compound **3** [M+H]<sup>+</sup>: *m/z* 325, C<sub>19</sub><sup>13</sup>CH<sub>26</sub>N<sub>3</sub>O).

**Fig. S156.** HRMS<sup>2</sup> of 2-methyl-3-hexyl prodiginine with incorporated [1-<sup>13</sup>C]-L-proline (compound **4** [M+H]<sup>+</sup>: *m/z* 339, C<sub>20</sub><sup>13</sup>CH<sub>28</sub>N<sub>3</sub>O).

**Fig. S157.** HRMS<sup>2</sup> of 2-methyl-3-heptyl prodiginine with incorporated [1-<sup>13</sup>C]-L-proline (compound **5** [M+H]<sup>+</sup>: *m/z* 353, C<sub>21</sub><sup>13</sup>CH<sub>30</sub>N<sub>3</sub>O).

**Fig. S158.** HRMS<sup>2</sup> of 2-methyl-3-nonyl prodiginine with incorporated [1-<sup>13</sup>C]-L-proline (compound **7** [M+H]<sup>+</sup>: *m/z* 381, C<sub>23</sub><sup>13</sup>CH<sub>34</sub>N<sub>3</sub>O).

**Fig. S159.** HRMS<sup>3</sup> of 2-methyl-3-propyl prodiginine with incorporated [1-<sup>13</sup>C]-L-proline (compound **1** [M+H]<sup>+</sup>: *m/z* 297 via 282, C<sub>17</sub><sup>13</sup>CH<sub>22</sub>N<sub>3</sub>O).

**Fig. S160.** HRMS<sup>3</sup> of 2-methyl-3-butyl prodiginine with incorporated [1-<sup>13</sup>C]-L-proline (compound **2** [M+H]<sup>+</sup>: *m/z* 311 via 296, C<sub>18</sub><sup>13</sup>CH<sub>24</sub>N<sub>3</sub>O).

**Fig. S161.** HRMS<sup>3</sup> of prodigiosin with incorporated [1-<sup>13</sup>C]-L-proline (compound **3** [M+H]<sup>+</sup>: *m/z* 325 via 310, C<sub>19</sub><sup>13</sup>CH<sub>26</sub>N<sub>3</sub>O).

**Fig. S162.** HRMS<sup>3</sup> of 2-methyl-3-hexyl prodiginine with incorporated [1-<sup>13</sup>C]-L-proline (compound **4** [M+H]<sup>+</sup>: *m/z* 339 via 324, C<sub>20</sub><sup>13</sup>CH<sub>28</sub>N<sub>3</sub>O).

**Fig. S163.** HRMS<sup>3</sup> of 2-methyl-3-heptyl prodiginine with incorporated [1-<sup>13</sup>C]-L-proline (compound **5** [M+H]<sup>+</sup>: *m/z* 353 via 338, C<sub>21</sub><sup>13</sup>CH<sub>30</sub>N<sub>3</sub>O).

**Fig. S164.** HRMS<sup>3</sup> of 2-methyl-3-nonyl prodiginine with incorporated [1-<sup>13</sup>C]-L-proline (compound **7** [M+H]<sup>+</sup>: *m/z* 381 via 366, C<sub>23</sub><sup>13</sup>CH<sub>34</sub>N<sub>3</sub>O).

**Fig. S165.** Proposed mass spectral fragmentation pathway of 2-methyl-3-propyl prodiginine with incorporated [1-<sup>13</sup>C]-L-proline (compound **1** [M+H]<sup>+</sup>: *m/z* 297, C<sub>17</sub><sup>13</sup>CH<sub>22</sub>N<sub>3</sub>O).

**Fig. S166.** Proposed mass spectral fragmentation pathway of 2-methyl-3-butyl prodiginine with incorporated [1-<sup>13</sup>C]-L-proline (compound **2** [M+H]<sup>+</sup>: *m/z* 311, C<sub>18</sub><sup>13</sup>CH<sub>24</sub>N<sub>3</sub>O).

**Fig. S167.** Proposed mass spectral fragmentation pathway of prodigiosin with incorporated [1-<sup>13</sup>C]-L-proline (compound **3** [M+H]<sup>+</sup>: *m/z* 325, C<sub>19</sub><sup>13</sup>CH<sub>26</sub>N<sub>3</sub>O).

**Fig. S168.** Proposed mass spectral fragmentation pathway of 2-methyl-3-hexyl prodiginine with incorporated [1-<sup>13</sup>C]-L-proline (compound **4** [M+H]<sup>+</sup>: *m/z* 339, C<sub>20</sub><sup>13</sup>CH<sub>28</sub>N<sub>3</sub>O).

**Fig. S169.** Proposed mass spectral fragmentation pathway of 2-methyl-3-heptyl prodiginine with incorporated [1-<sup>13</sup>C]-L-proline (compound **5** [M+H]<sup>+</sup>: *m/z* 353, C<sub>21</sub><sup>13</sup>CH<sub>30</sub>N<sub>3</sub>O).

**Fig. S170.** Proposed mass spectral fragmentation pathway of 2-methyl-3-nonyl prodiginine with incorporated [1-<sup>13</sup>C]-L-proline (compound **7** [M+H]<sup>+</sup>: *m/z* 381, C<sub>23</sub><sup>13</sup>CH<sub>34</sub>N<sub>3</sub>O).

**Fig. S171.** HRMS<sup>2</sup> of prodigiosin with 5 incorporated [1,2-<sup>13</sup>C<sub>2</sub>]-acetate units (compound **3** [M+H]<sup>+</sup>: *m/z* 334, C<sub>10</sub><sup>13</sup>C<sub>10</sub>H<sub>26</sub>N<sub>3</sub>O).

**Fig. S172.** HRMS<sup>2</sup> of prodigiosin with 6 incorporated [1,2-<sup>13</sup>C<sub>2</sub>]-acetate units (compound **3** [M+H]<sup>+</sup>: *m/z* 336, C<sub>8</sub><sup>13</sup>C<sub>12</sub>H<sub>26</sub>N<sub>3</sub>O).

**Fig. S173.** HRMS<sup>2</sup> of prodigiosin with 7 incorporated [1,2-<sup>13</sup>C<sub>2</sub>]-acetate units (compound **3** [M+H]<sup>+</sup>: *m/z* 338, C<sub>6</sub><sup>13</sup>C<sub>14</sub>H<sub>26</sub>N<sub>3</sub>O).

**Fig. S174.** Confrontation assay of endophytic *Pichia* spp. against *S. aureus* (DSM 799) and *E. coli* (DSM 682).

**Fig. S175.** Confrontation assay of endophytic *A. caesiellus* against *S. aureus* (DSM 799) and *E. coli* (DSM 682).

**Fig. S176.** Confrontation assay of endophytic *P. virgatula* against *S. aureus* (DSM 799) and *E. coli* (DSM 682).

**Fig. S177.** Scanning electron microscopic images of endophytic *S. marcescens* MSRBB2.

**Fig. S178.** Scanning electron microscopic images of endophytic *P. virgatula*.

**Fig. S179.** Scanning electron microscopic images (1) of endophytic *A. caesiellus*.

**Fig. S180.** Scanning electron microscopic images (2) of endophytic *A. caesiellus*.

**Fig. S181.** Scanning electron microscopic images (1) of endophytic *Pichia* spp.

**Fig. S182.** Scanning electron microscopic images (2) of endophytic *Pichia* spp.

**Fig. S183.** Scanning electron microscopic images (1) of co-cultivation of endophytic *P. virgatula* and *S. marcescens* MSRBB2.

**Fig. S184.** Scanning electron microscopic images (2) of co-cultivation of endophytic *P. virgatula* and *S. marcescens* MSRBB2.

**Fig. S185.** Scanning electron microscopic images (3) of co-cultivation of endophytic *P. virgatula* and *S. marcescens* MSRBB2.

**Fig. S186.** Scanning electron microscopic images (1) of co-cultivation of endophytic *A. caesiellus* and *S. marcescens* MSRBB2.

**Fig. S187.** Scanning electron microscopic images (2) of co-cultivation of endophytic *A. caesiellus* and *S. marcescens* MSRBB2.

**Fig. S189.** Scanning electron microscopic images (3) of co-cultivation of endophytic *A. caesiellus* and *S. marcescens* MSRBB2.

**Fig. S190.** Scanning electron microscopic images (1) of co-cultivation of endophytic *Pichia* spp. and *S. marcescens* MSRBB2.

**Fig. S191.** Scanning electron microscopic images (2) of co-cultivation of endophytic *Pichia* spp. and *S. marcescens* MSRBB2.

**Fig. S192.** Scanning electron microscopic images of *Aspergillus fumigatus* (DSM 21023).

**Fig. S193.** Scanning electron microscopic images of co-cultivation of endophytic *S. marcescens* MSRBB2 and *Aspergillus fumigatus* (DSM 21023).

**Fig. S194.** Scanning electron microscopic images of *Pichia membranifaciens* (DSM 70366).

**Fig. S195.** Scanning electron microscopic images of co-cultivation of endophytic *S. marcescens* MSRBB2 and *Pichia membranifaciens* (DSM 70366).

**Fig. S196.** Scanning electron microscopic images of *Pestalotiopsis versicolor* (DSM 62887).

**Fig. S197.** Scanning electron microscopic images of co-cultivation of endophytic *S. marcescens* MSRBB2 and *Pestalotiopsis versicolor* (DSM 62887).

**Fig. S198.** Dose and time dependent disc line assay of different prodigiosin concentrations against *A. caesiellus*

**Fig. S199.** Dose and time dependent Y-shape disc assay of different prodigiosin concentrations against *A. caesiellus*

**Fig. S200.** Dose and time dependent disc line assay of different prodigiosin concentrations against *Pichia* spp.

**Fig. S201.** Dose and time dependent Y-shape disc assay of different prodigiosin concentrations against *Pichia* spp.

**Fig. S202.** Dose and time dependent disc line assay of different prodigiosin concentrations against *P. virgatula*

**Fig. S203.** Dose and time dependent Y-shape disc assay of different prodigiosin concentrations against *P. virgatula*

**Fig. S204.** *S. marcescens* MSRBB2 on chitinase detection agar incubated at 30 °C and monitored for 14 days. Chitinase detection media<sup>1</sup> (A) showing degradation of chitin by chitinase enzymes resulting in pH change and color change of Bromocresol purple dye. Chitinase detection media with supplemented glucose (20 g/L, B) showing no chitinase enzyme expression. Glucose is inhibiting chitinase expression.

**Fig. S205.** Digital microscope images with different magnifications of the colonization of endophytic *A. caesiellus* by *S. marcescens* MSRBB2. Hyphae of the fungus is overgrown with *S. marcescens* MSRBB2 colonies.

**Fig. S206.** MALDI-imaging-HRMS of the co-cultivation of bacterial endophyte *S. marcescens* MSRBB2 and fungal endophyte *A. caesiellus* after 3 days. Optical image with assigned scan area and localization of prodiginines ( $[M+H]^+ \pm 2$  ppm, (A)). Different fragments of MALDI-imaging-HRMS<sup>2</sup> of prodigiosin (B).

**Fig. S207.** MALDI-imaging-HRMS of the co-cultivation of bacterial endophyte *S. marcescens* MSRBB2 and fungal endophyte *A. caesiellus* after 3 days. Optical image with assigned scan area and localization of prodiginines ( $[M+H]^+ \pm 2$  ppm).

**Fig. S208.** MALDI-imaging-HRMS of the co-cultivation of bacterial endophyte *S. marcescens* MSRBB2 and fungal endophyte *A. caesiellus* after 5 days. Optical image with assigned scan area and localization of prodiginines ( $[M+H]^+ \pm 2$  ppm).

**Fig. S209.** MALDI-imaging-HRMS of the co-cultivation of bacterial endophyte *S. marcescens* MSRBB2 and fungal endophyte *A. caesiellus* after 7 days. Optical image with assigned scan area and localization of prodiginines ( $[M+H]^+ \pm 2$  ppm, (A)). Different fragments of MALDI-imaging-HRMS<sup>2</sup> of prodigiosin (B).

**Fig. S210.** MALDI-imaging-HRMS of the co-cultivation of bacterial endophyte *S. marcescens* MSRBB2 and fungal endophyte *A. caesiellus* after 7 days. Optical image with assigned scan area and localization of prodiginines ( $[M+H]^+ \pm 2$  ppm, (A)). Different fragments of MALDI-imaging-HRMS<sup>2</sup> of prodigiosin (B).

**Fig. S211.** Images of solo cultivation of endophytic *S. marcescens* MSRBB2 (Control).

**Fig. S212.** MALDI-imaging-HRMS of solo cultivation of bacterial endophyte *S. marcescens* MSRBB2 after 7 days. Optical image with assigned scan area and localization of prodiginines 1-5 ( $[M+H]^+ \pm 2$  ppm).

**Fig. S213.** HPLC-HRMS comparison of prodigiosin (Extracted ion chromatograms,  $[M+H]^+ \pm 2$  ppm) production by endophytic *S. marcescens* MSRBB2 of mono-cultivation and co-cultivations with fungal endophytes *A. caesiellus* and *Pichia* spp. (five Petri dishes) after 7 days incubation (30°C).

**Fig. S214.** HPLC-HRMS of extracts of bacterial endophyte *S. marcescens* MSRBB2 incubated at 30°C and 37°C for 24h, optical images of incubated nutrient agar Petri dishes, and extracted ion chromatograms of serrawettin w1 ( $[M+H]^+ \pm 2$  ppm) (A) Enlarged microscopic images (B).



**Fig. S215.** MALDI-imaging-HRMS of the co-cultivation of bacterial endophyte *S. marcescens* MSRBB2 and fungal endophyte *A. caesiellus* after 3 days. Optical image with assigned scan area and localization of serratamolides ( $[M+K]^+ \pm 2$  ppm).

**Fig. S216.** MALDI-imaging-HRMS of the co-cultivation of bacterial endophyte *S. marcescens* MSRBB2 and fungal endophyte *A. caesiellus* after 5 days. Optical image with assigned scan area and localization of serratamolides ( $[M+K]^+ \pm 2$  ppm).

**Fig. S217.** MALDI-imaging-HRMS of the co-cultivation of bacterial endophyte *S. marcescens* MSRBB2 and fungal endophyte *A. caesiellus* after 7 days. Optical image with assigned scan area and localization of serratamolides ( $[M+K]^+ \pm 2$  ppm).

**Fig. S218.** MALDI-imaging-HRMS of the co-cultivation of bacterial endophyte *S. marcescens* MSRBB2 and fungal endophyte *A. caesiellus* after 7 days. Optical image with assigned scan area and localization of serratamolides ( $[M+K]^+ \pm 2$  ppm).

**Fig. S219.** MALDI-imaging-HRMS of solo cultivation of bacterial endophyte *S. marcescens* MSRBB2 after 7 days. Optical image with assigned scan area and localization of serratamolides ( $[M+K]^+ \pm 2$  ppm).

**Fig. S220.** MALDI-imaging-HRMS of solo cultivation of bacterial endophyte *S. marcescens* MSRBB2 after 7 days. Optical image with assigned scan area and localization of serratamolides ( $[M+K]^+ \pm 2$  ppm).

**Fig. S221.** Possible decomposition of serratamolides by hydrolysis resulting in open-ring serratamolides and/ or “monomers”.

**Fig. S222.** Digital microscope images of leaf puncture bioassay of *M. canariensis*, *M. heterophylla*, and *M. senegalensis* against prodigiosin (B) and serrawettin W1 (C) after 6 days (Scale bar = 500  $\mu$ m; Blank (A)).

**Fig. S223.** Isolation of endophytic *S. marcescens* MSRBB2 from *M. serrata* stem. Primary isolation plate (A) along with magnification (C) and spread axenic isolate (B).

**Fig. S224.** Microscopic images of endophytic fungi *Pichia* spp. (A), *A. caesiellus* (B), and *P. virgatula* (C) isolated from *M. serrata*.

## II. SUPPLEMENTARY TABLES

**Table S1.** Peak height ratios from high resolution mass spectrometry of serratamolides labeled with [1,2-<sup>13</sup>C<sub>2</sub>]-sodium acetate (n.d. = not detected; \* = observed peak height in % of M+4).

## III. REFERENCES

## I. SUPPLEMENTARY FIGURES

**Fig. S1.** HRMS<sup>2</sup> of 2-methyl-3-propyl prodiginine (compound **1** [M+H]<sup>+</sup>:  $m/z$  296, C<sub>18</sub>H<sub>22</sub>N<sub>3</sub>O).

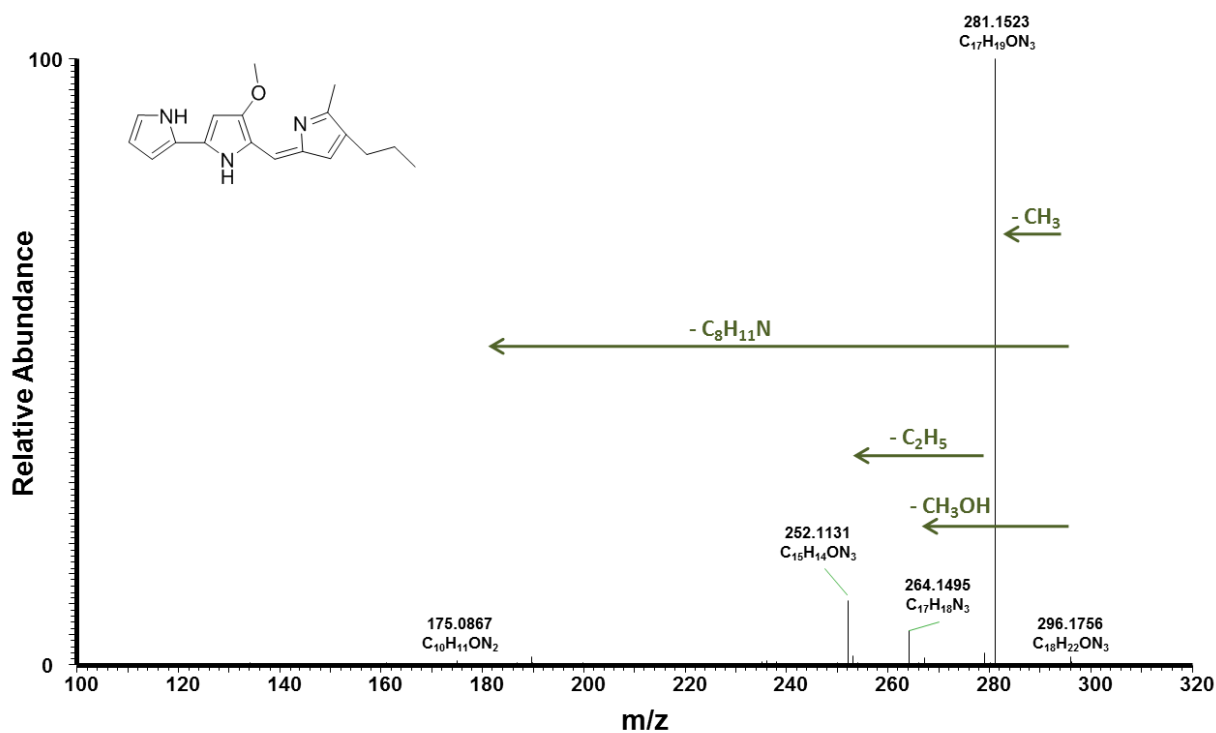

**Fig. S2.** HRMS<sup>2</sup> of 2-methyl-3-butyl prodiginine (compound **2** [M+H]<sup>+</sup>:  $m/z$  310, C<sub>19</sub>H<sub>24</sub>N<sub>3</sub>O).

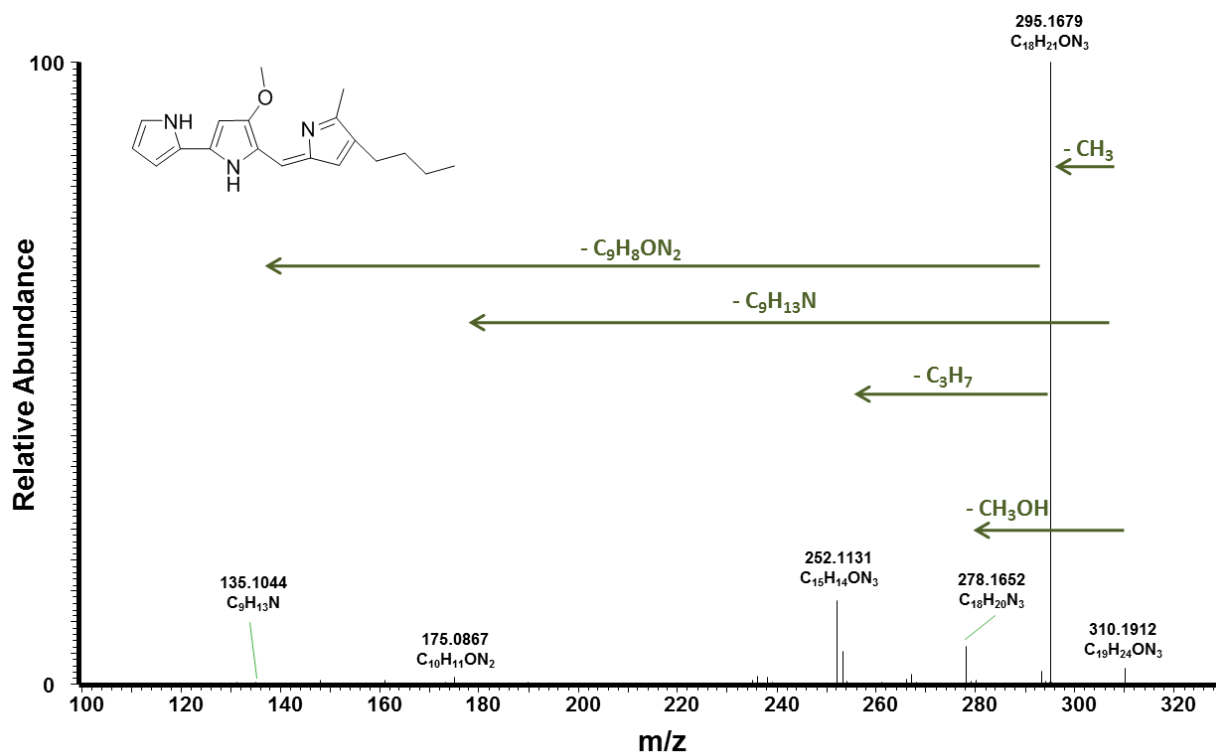

Fig. S3. HRMS<sup>2</sup> of prodigiosin (compound 3 [M+H]<sup>+</sup>: *m/z* 324, C<sub>20</sub>H<sub>26</sub>N<sub>3</sub>O).

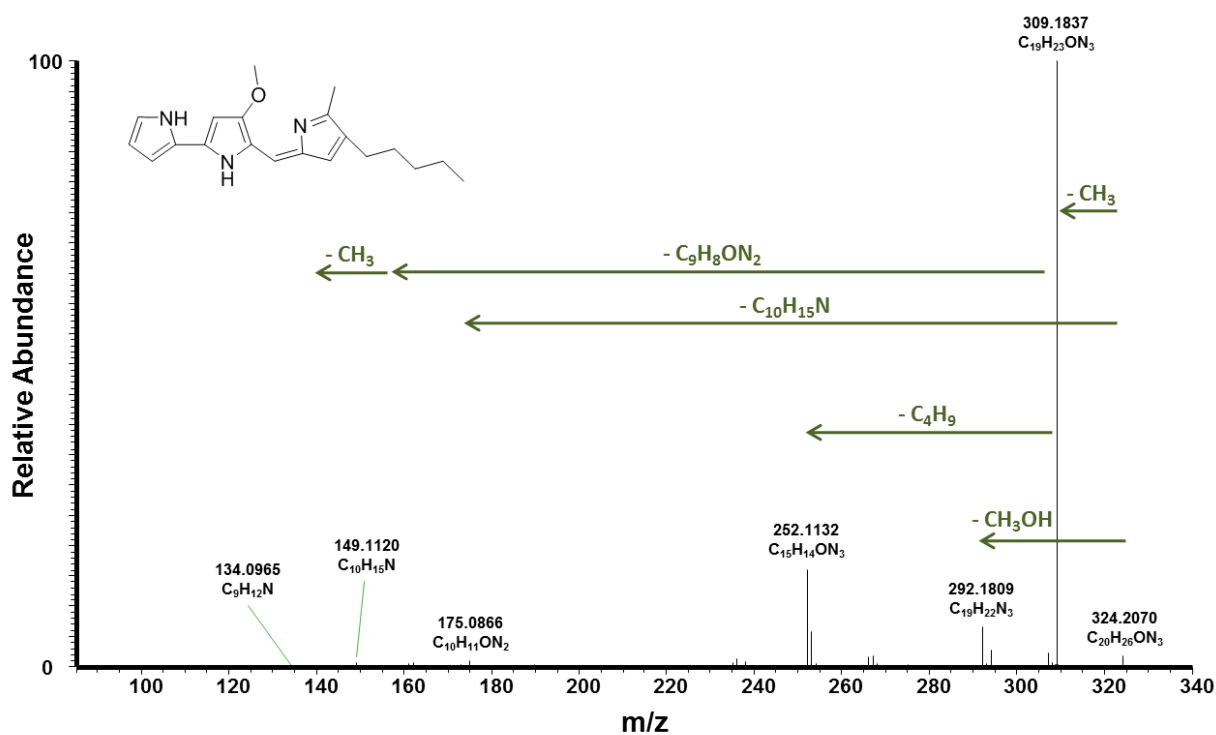

Fig. S4. HRMS<sup>2</sup> of 2-methyl-3-hexyl prodiginine (compound 4 [M+H]<sup>+</sup>: *m/z* 338, C<sub>21</sub>H<sub>28</sub>N<sub>3</sub>O).

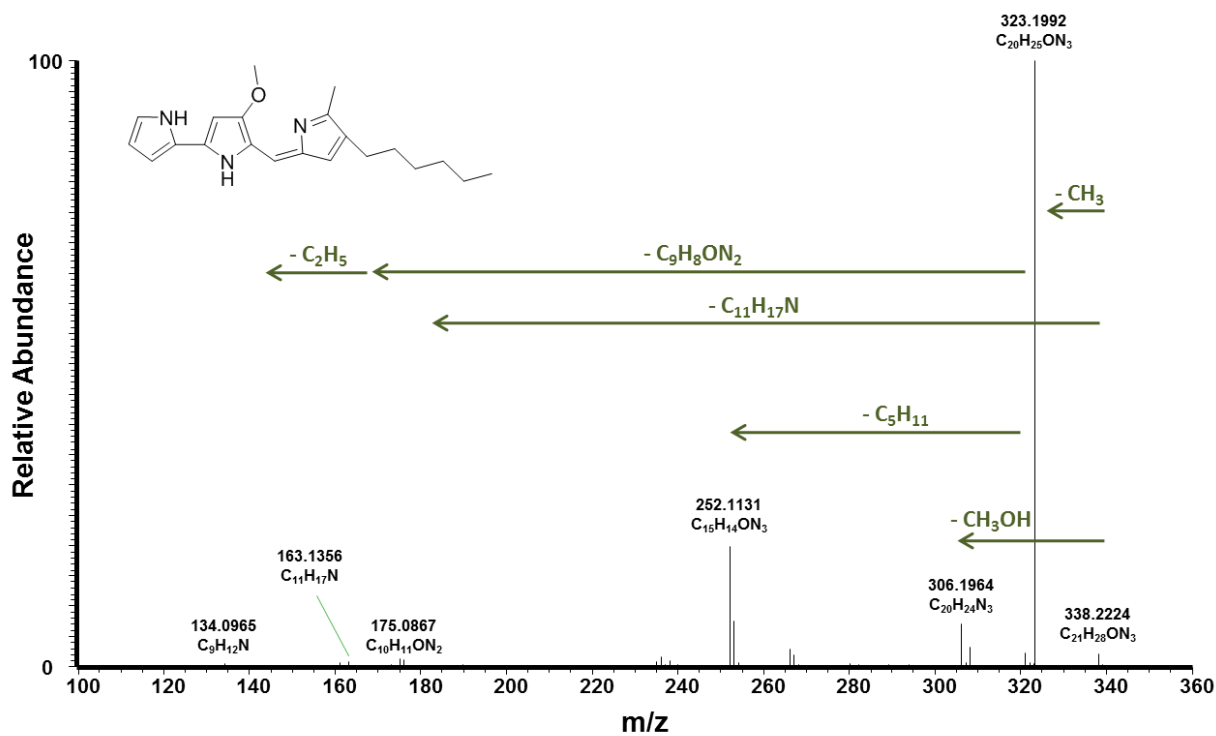

Fig. S5. HRMS<sup>2</sup> of 2-methyl-3-heptyl prodiginine (compound **5** [M+H]<sup>+</sup>: *m/z* 352, C<sub>22</sub>H<sub>30</sub>N<sub>3</sub>O).

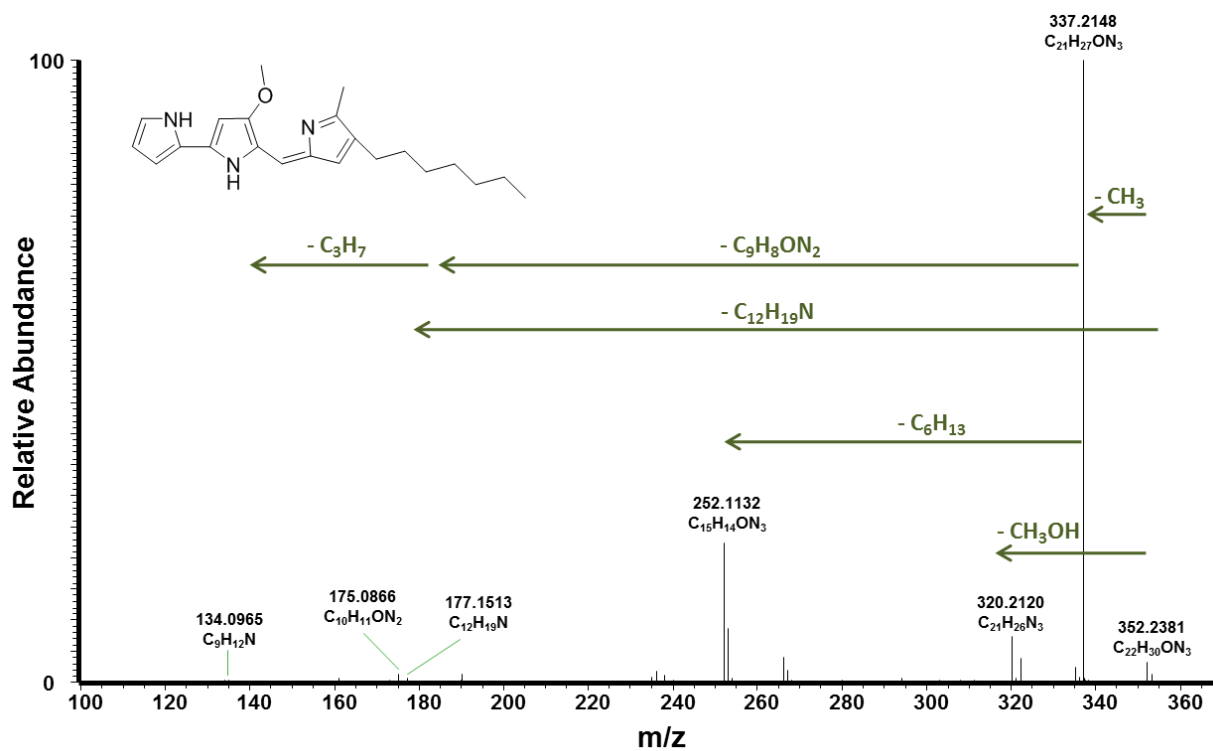

Fig. S6. HRMS<sup>2</sup> of 2-methyl-3-octyl prodiginine (compound **6** [M+H]<sup>+</sup>: *m/z* 366, C<sub>23</sub>H<sub>32</sub>N<sub>3</sub>O).

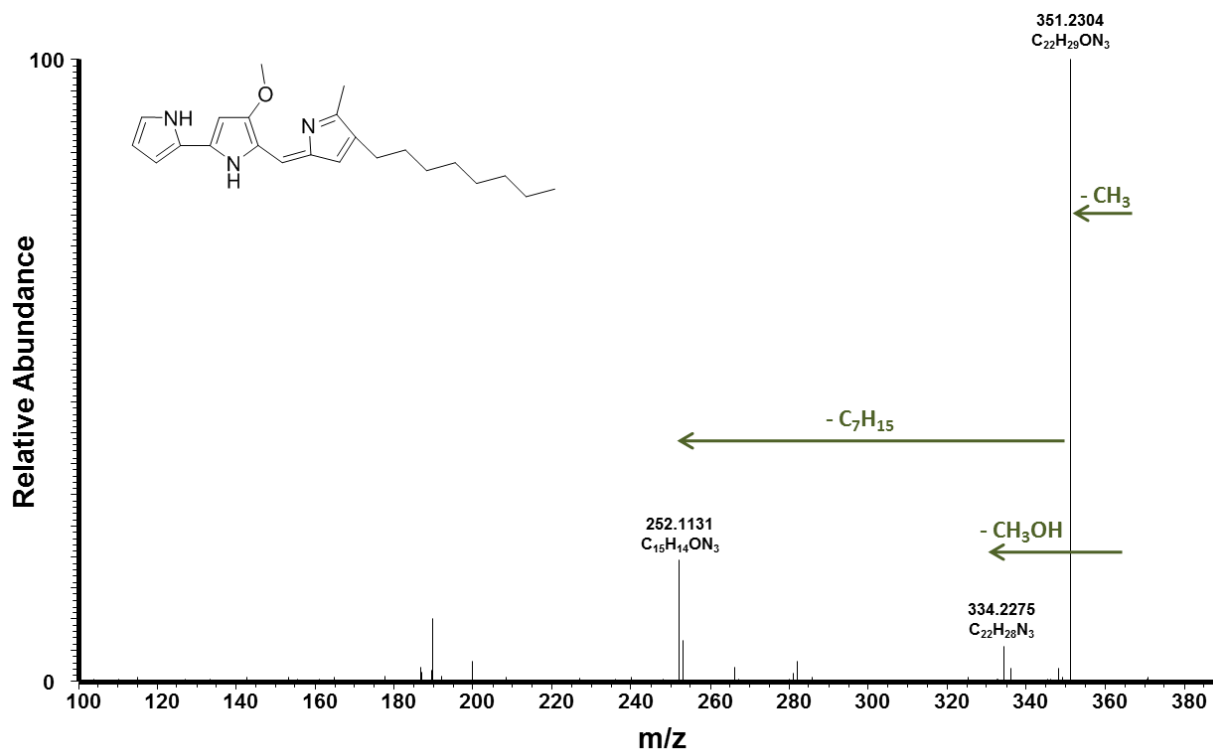

Fig. S7. HRMS<sup>2</sup> of 2-methyl-3-nonyl prodiginine (compound **7** [M+H]<sup>+</sup>:  $m/z$  380, C<sub>24</sub>H<sub>34</sub>N<sub>3</sub>O).

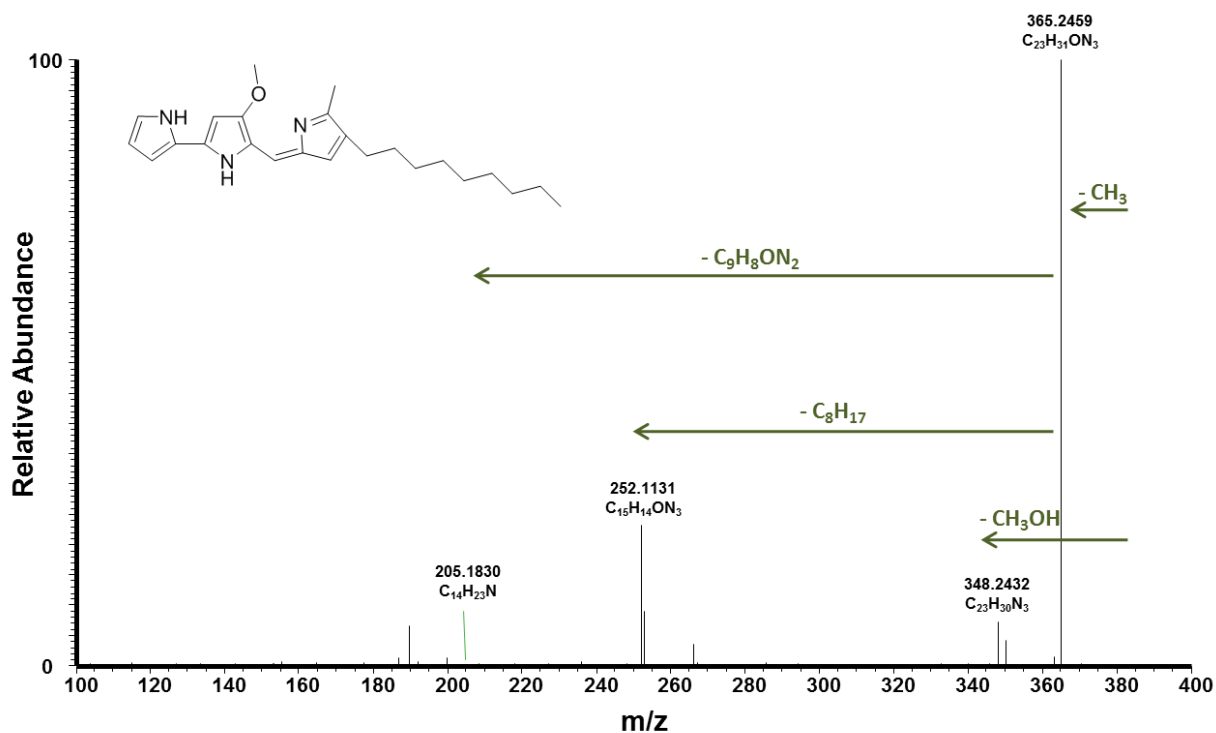

Fig. S8. HRMS<sup>3</sup> of 2-methyl-3-propyl prodiginine (compound **1** [M+H]<sup>+</sup>:  $m/z$  296 via 281).

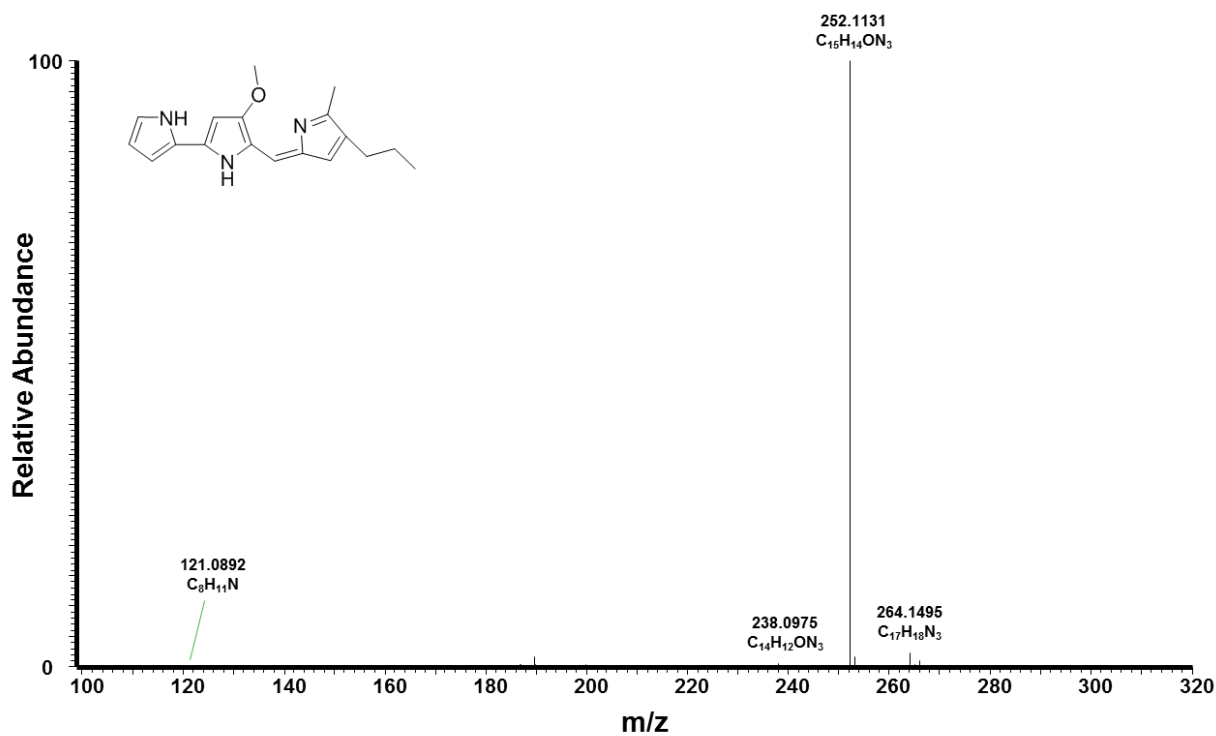

Fig. S9. HRMS<sup>3</sup> of 2-methyl-3-butyl prodiginine (compound 2 [M+H]<sup>+</sup>: *m/z* 310 via 295).

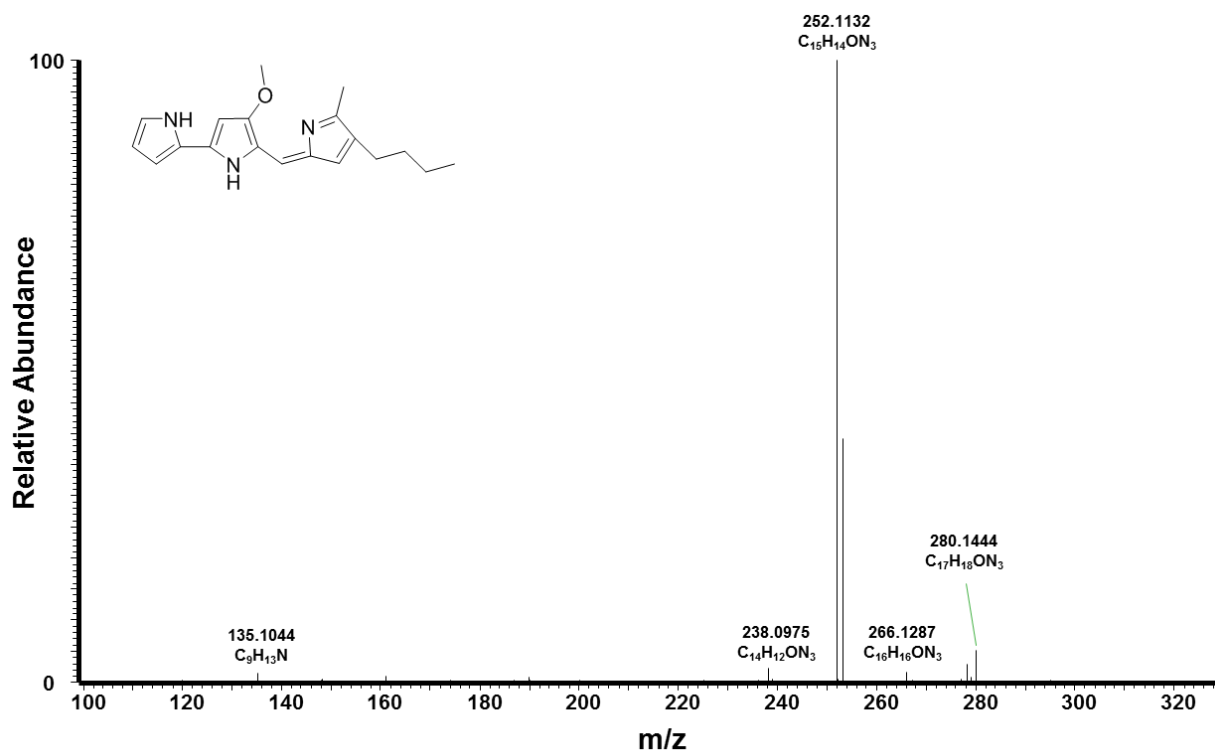

Fig. S10. HRMS<sup>3</sup> of prodigiosin (compound 3 [M+H]<sup>+</sup>: *m/z* 324 via 309).

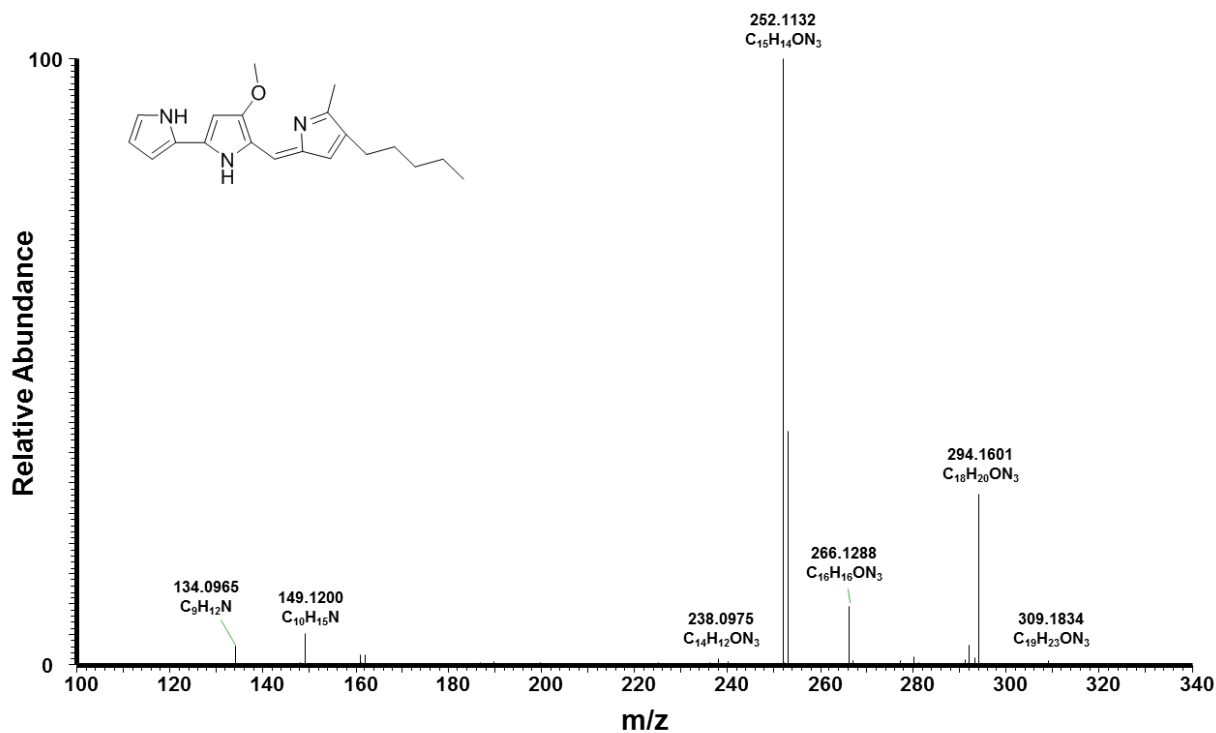

Fig. S11. HRMS<sup>3</sup> of 2-methyl-3-hexyl prodiginine (compound **4** [M+H]<sup>+</sup>: *m/z* 338 via 323).

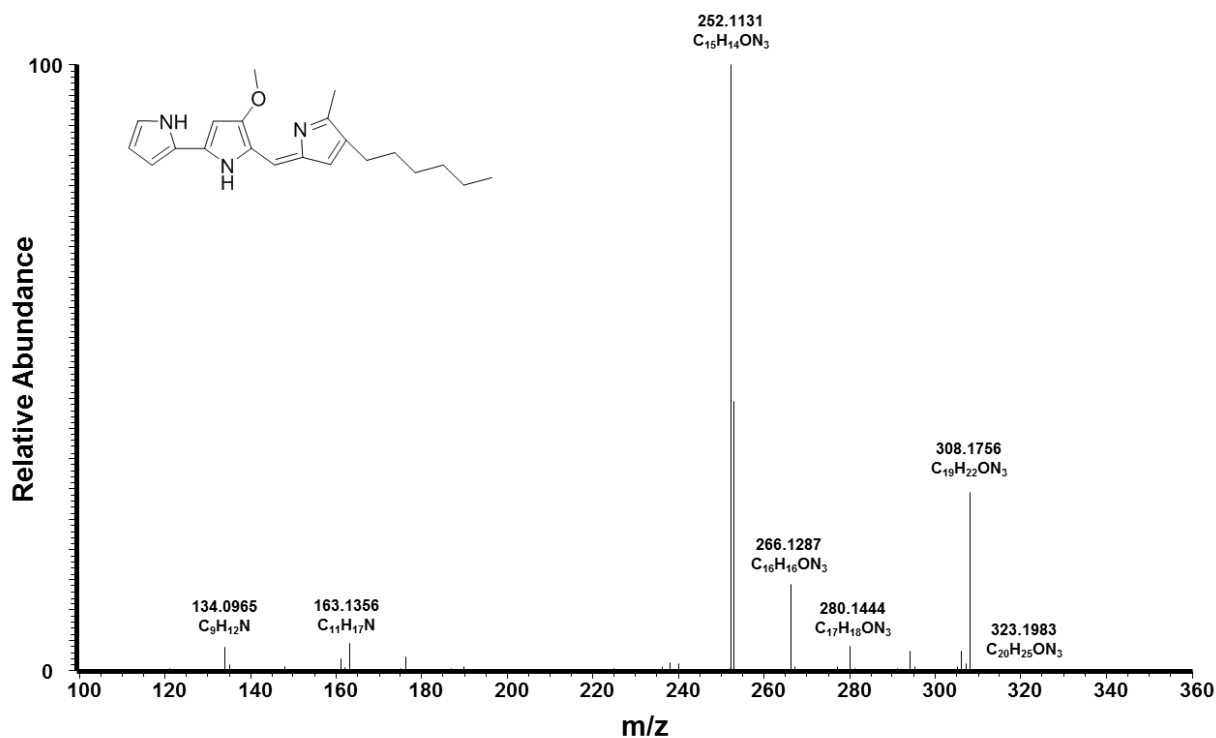

Fig. S12. HRMS<sup>3</sup> of 2-methyl-3-heptyl prodiginine (compound **5** [M+H]<sup>+</sup>: *m/z* 352 via 337).

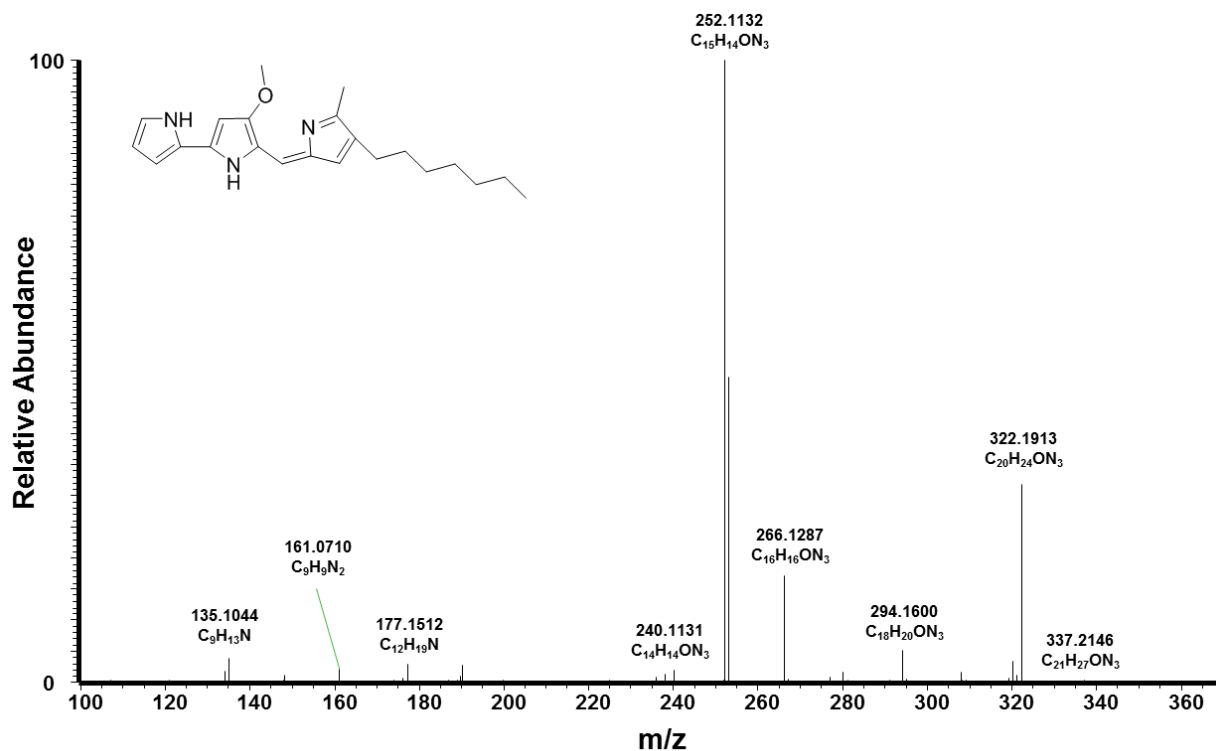



Fig. S13. HRMS<sup>3</sup> of 2-methyl-3-octyl prodiginine (compound 6 [M+H]<sup>+</sup>: *m/z* 366 via 351).

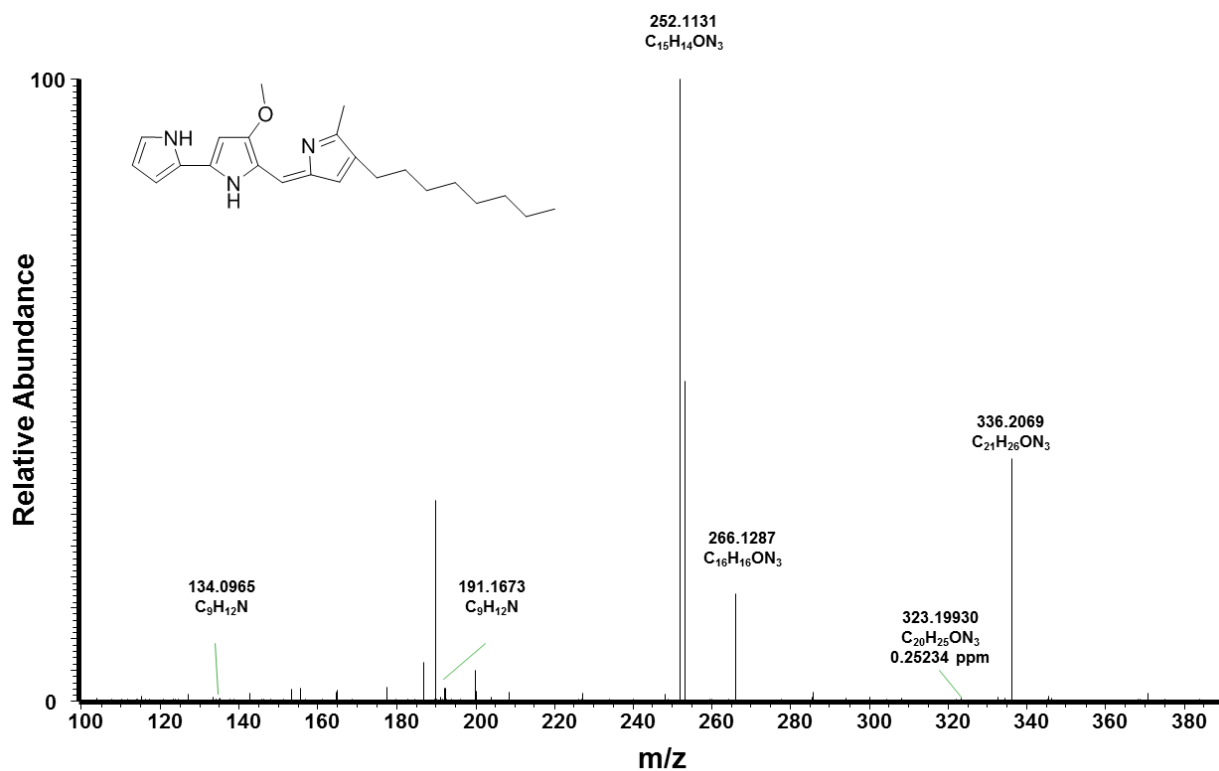

Fig. S14. HRMS<sup>3</sup> of 2-methyl-3-nonyl prodiginine (compound 7 [M+H]<sup>+</sup>: *m/z* 380 via 365).

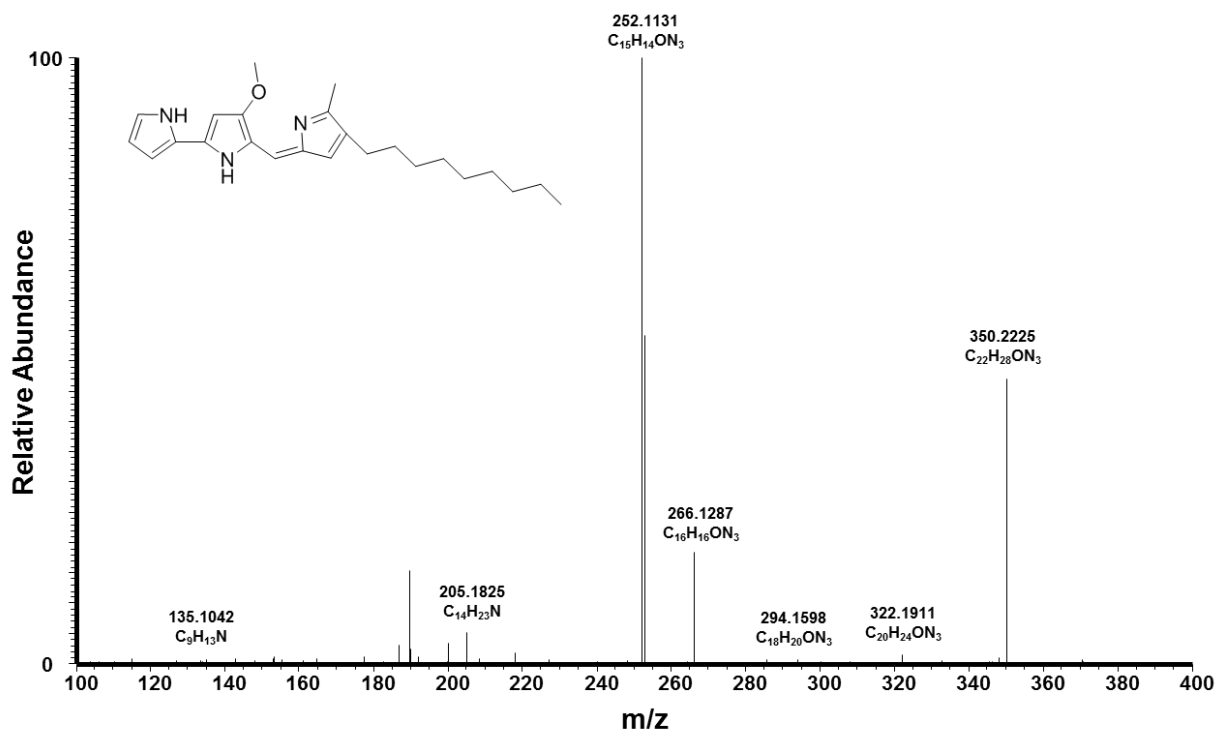

**Fig. S15.** Proposed mass spectral fragmentation pathway of 2-methyl-3-propyl prodiginine (compound **1**  $[M+H]^+$ :  $m/z$  296,  $C_{18}H_{22}N_3O$ ).

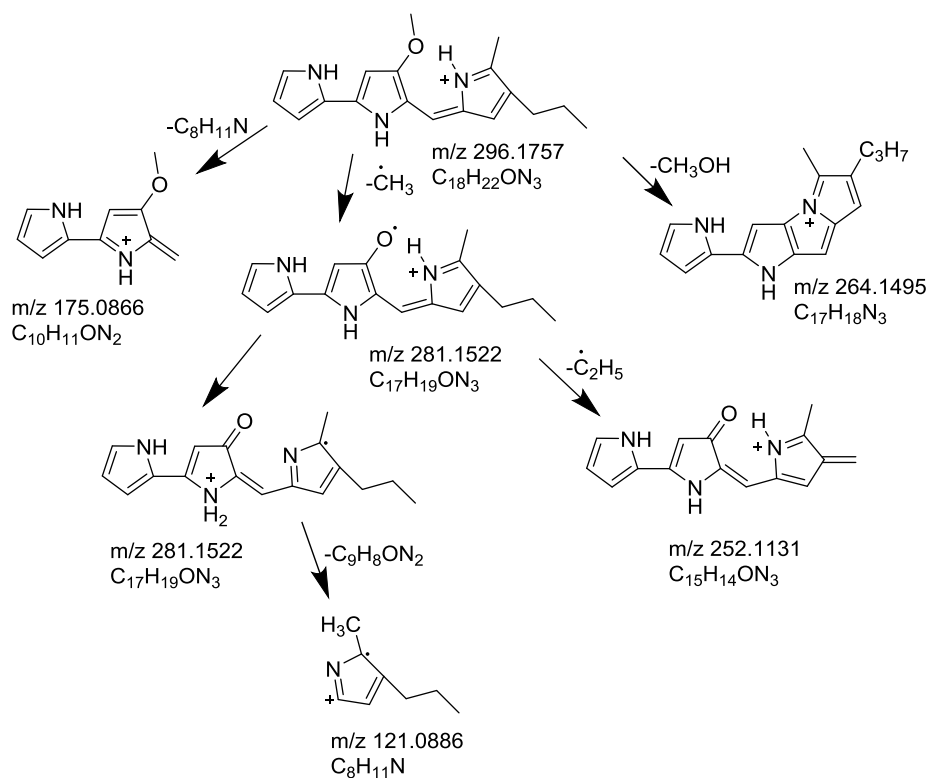

**Fig. S16.** Proposed mass spectral fragmentation pathway of 2-methyl-3-butyl prodiginine (compound **2**  $[M+H]^+$ :  $m/z$  310,  $C_{19}H_{24}N_3O$ ).

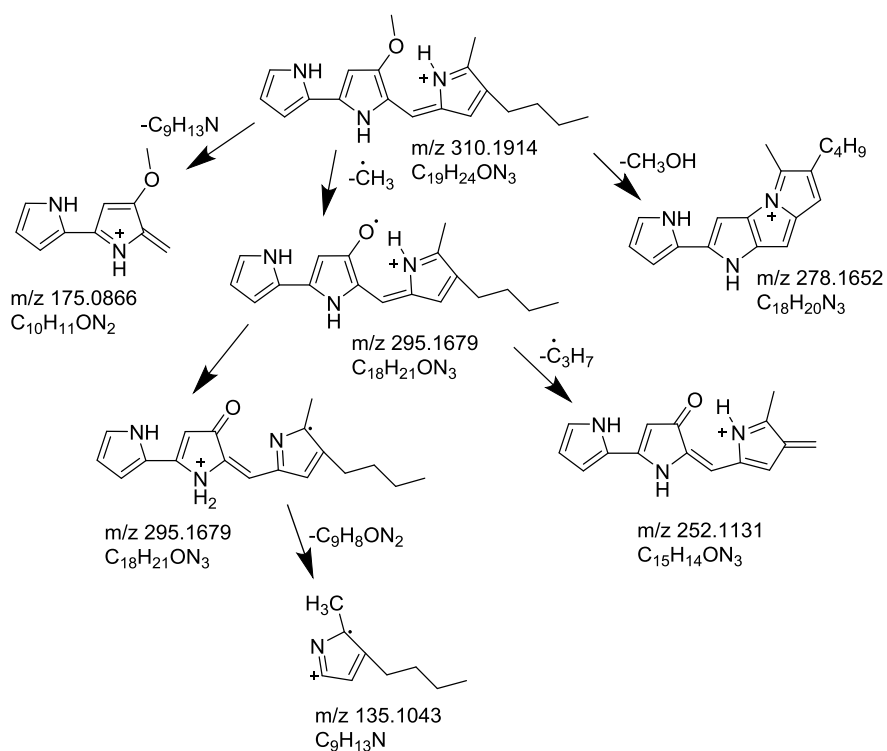

**Fig. S17.** Proposed mass spectral fragmentation pathway of prodigiosin (compound **3**  $[M+H]^+$ :  $m/z$  324,  $C_{20}H_{26}N_3O$ ).

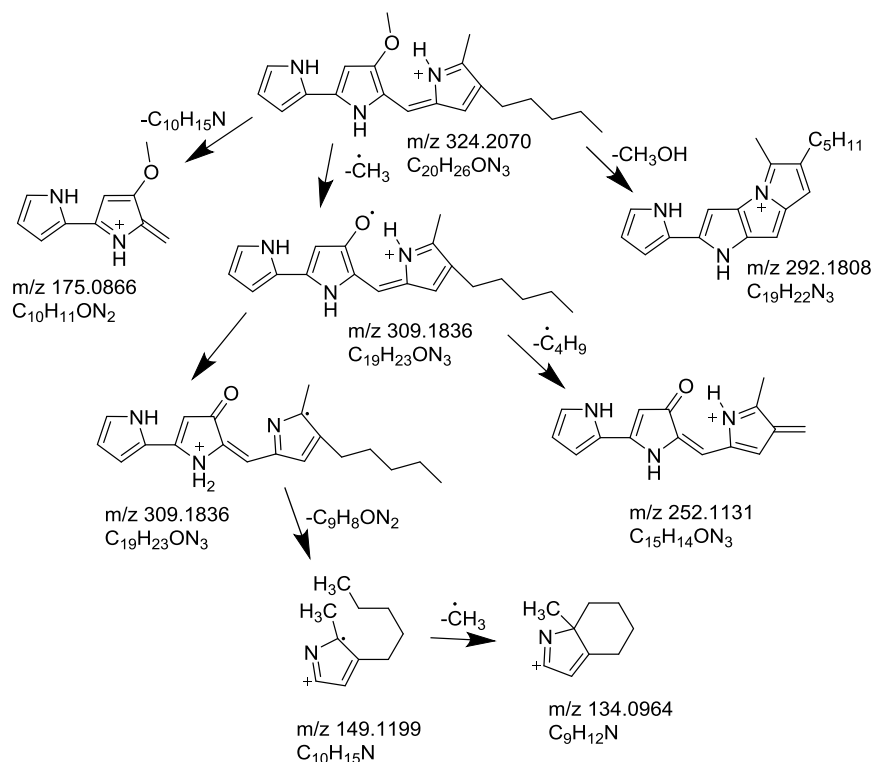

**Fig. S18.** Proposed mass spectral fragmentation pathway of 2-methyl-3-hexyl prodigine (compound **4**  $[M+H]^+$ :  $m/z$  338,  $C_{21}H_{28}N_3O$ ).

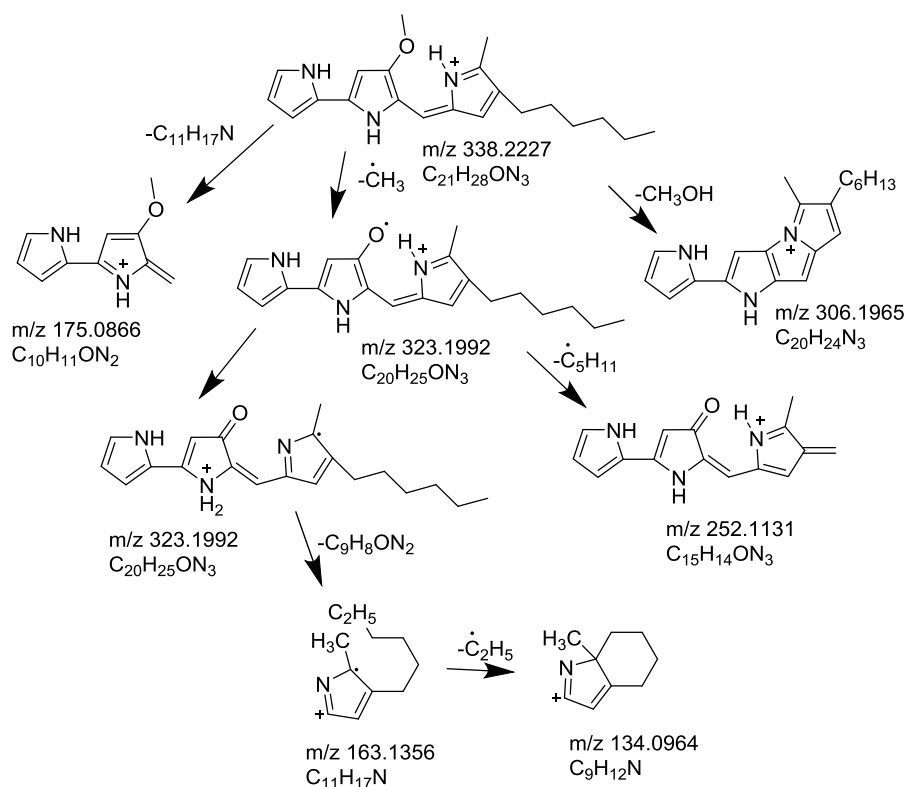

**Fig. S19.** Proposed mass spectral fragmentation pathway of 2-methyl-3-heptyl prodiginine (compound **5**  $[M+H]^+$ :  $m/z$  352,  $C_{22}H_{30}N_3O$ ).

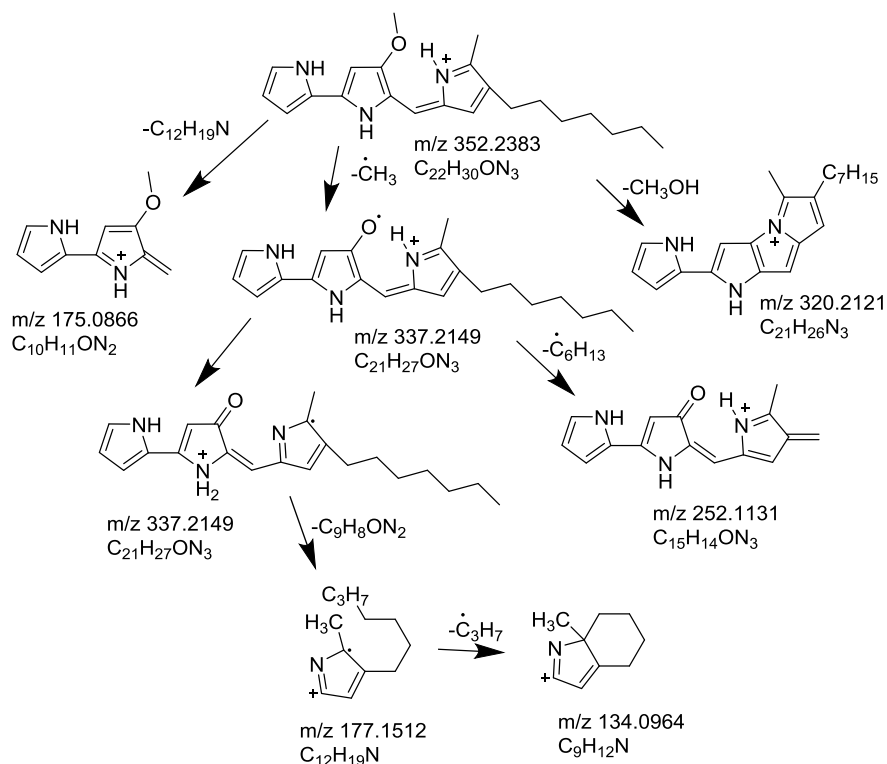

**Fig. S20.** Proposed mass spectral fragmentation pathway of 2-methyl-3-octyl prodiginine (compound **6**  $[M+H]^+$ :  $m/z$  366,  $C_{23}H_{32}N_3O$ ).

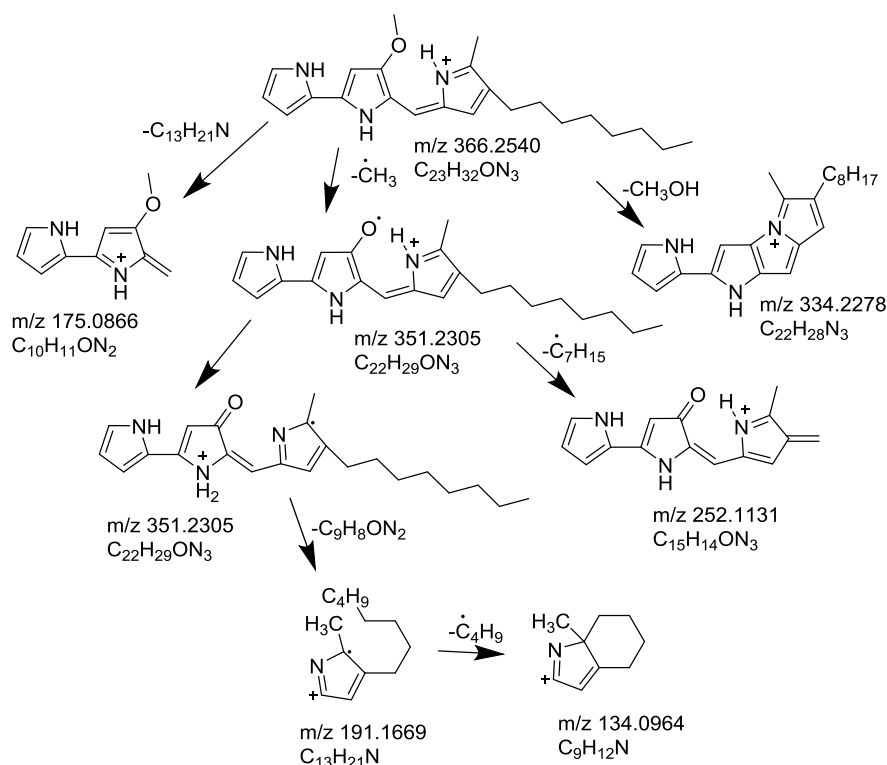

**Fig. S21.** Proposed mass spectral fragmentation pathway of 2-methyl-3-nonyl prodiginine (compound **7**  $[M+H]^+$ :  $m/z$  380,  $C_{24}H_{34}N_3O$ ).

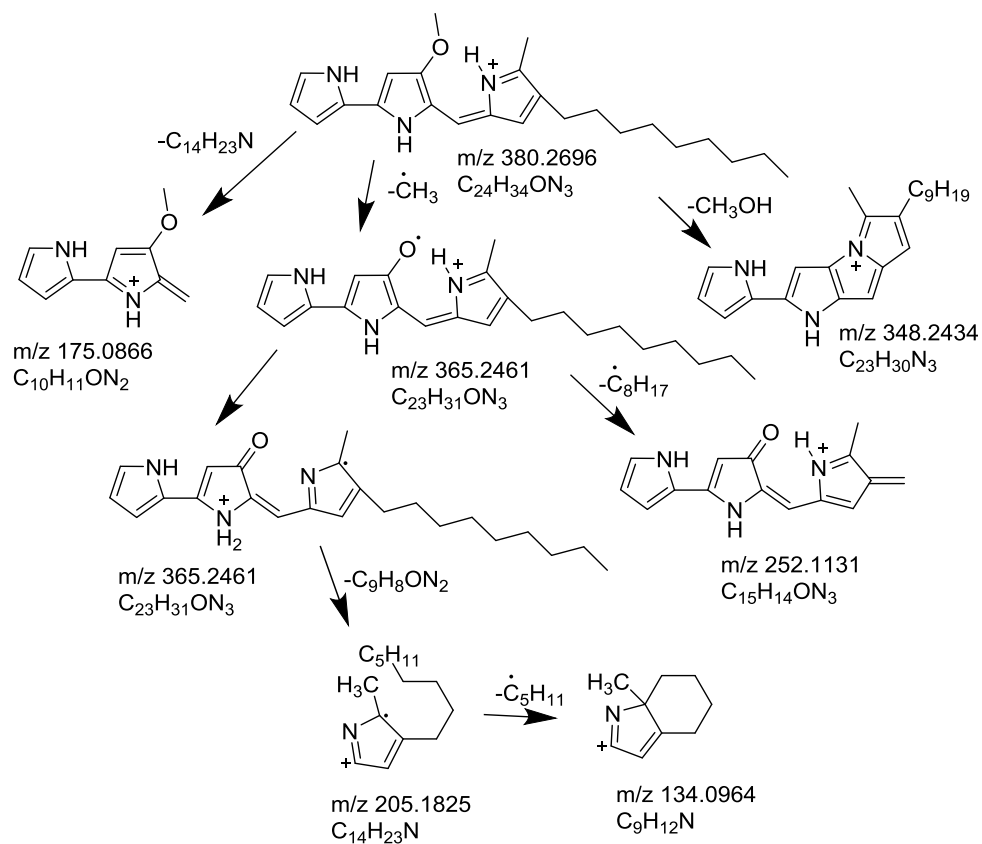

**Fig. S22.** HPLC-HRMS analysis of prodiginines (**1-7**). TIC, extracted ion chromatograms of prodiginines, and area in comparison to the main metabolite prodigosin.

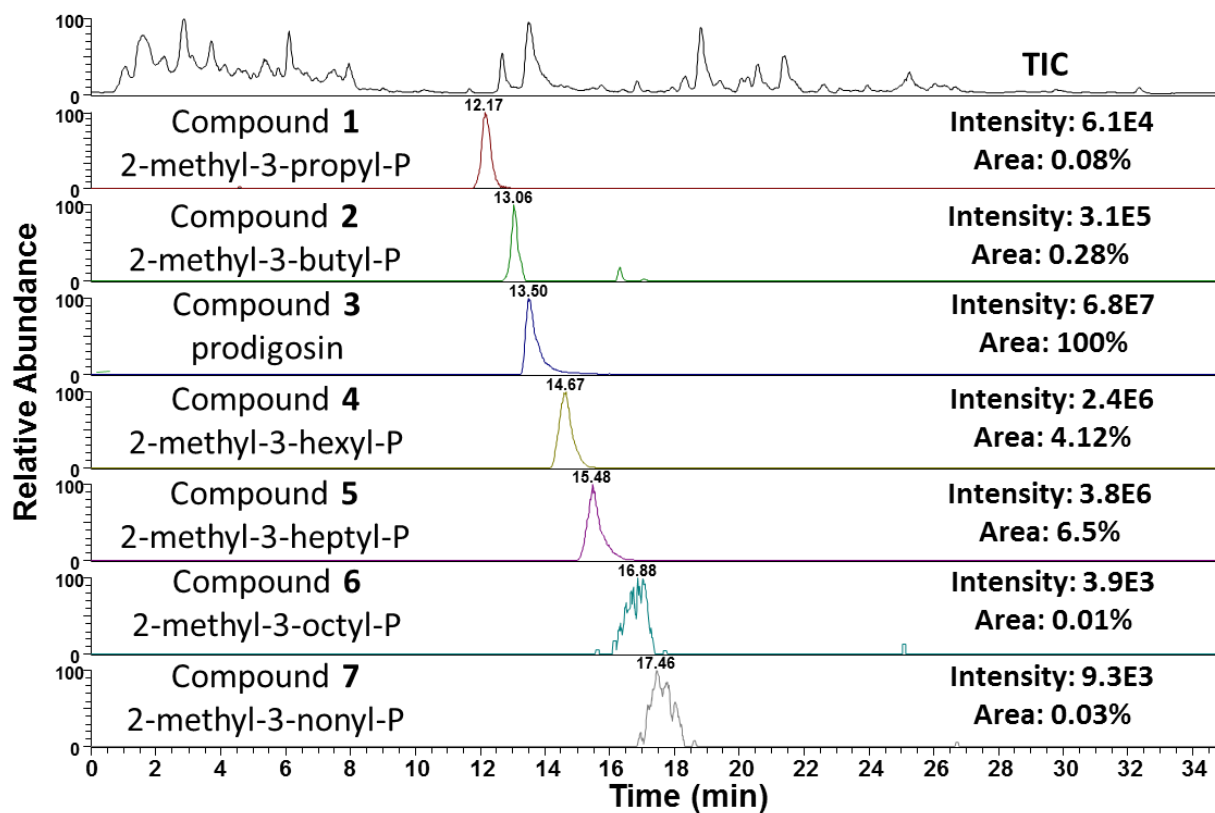

**Fig. S23.** HPLC-HRMS analysis of serratamolides (**8-14**). TIC, extracted ion chromatograms of serratamolides, and area in comparison to the main metabolite serrawettin W1.

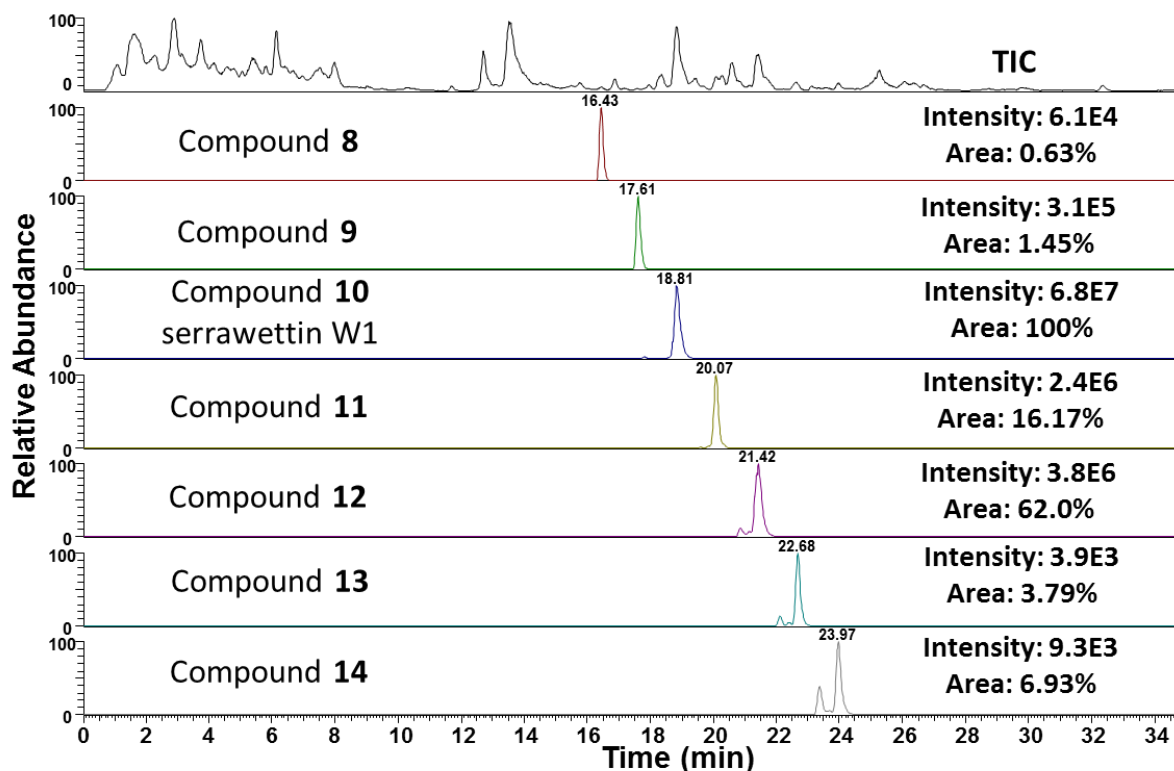

**Fig. S24.** HPLC-HRMS analysis of serratamolides (**15-19**). TIC, extracted ion chromatograms of serratamolides, and area in comparison to the main metabolite serrawettin W1\*.

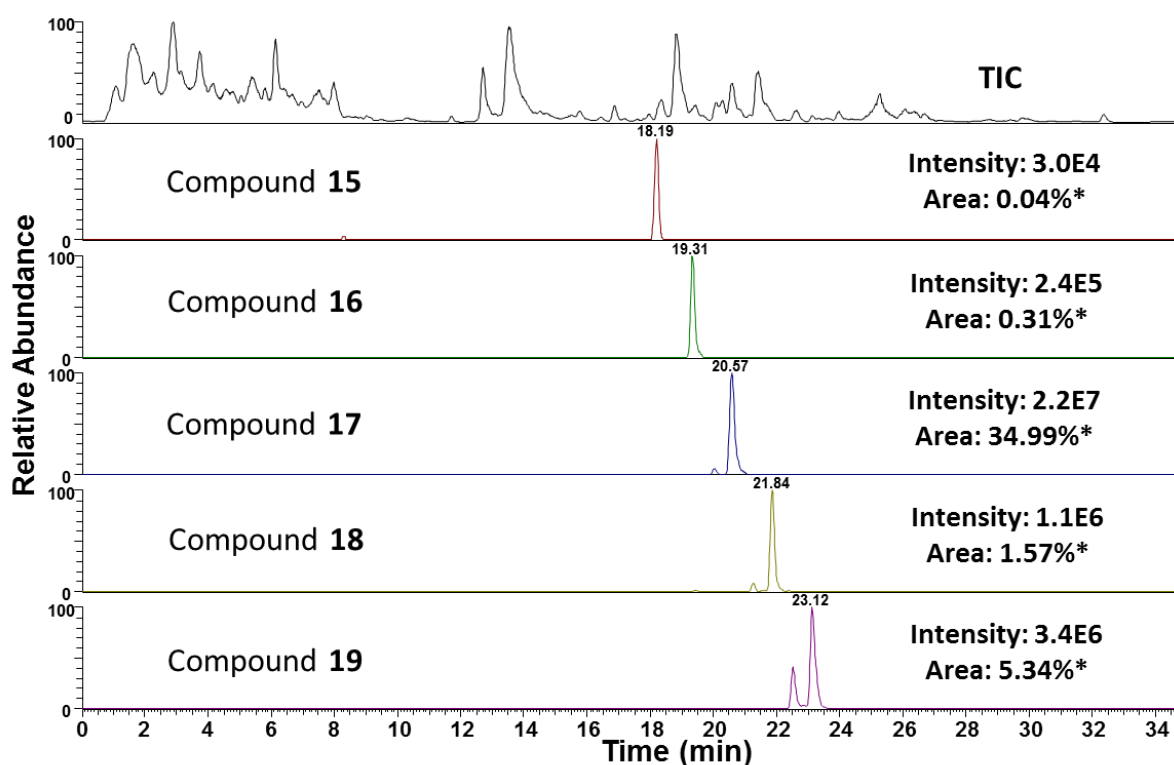

**Fig. S25.** HPLC-HRMS analysis of serratamolides (**20-25**). TIC, extracted ion chromatograms of serratamolides, and area in comparison to the main metabolite serrawettin W1\*.

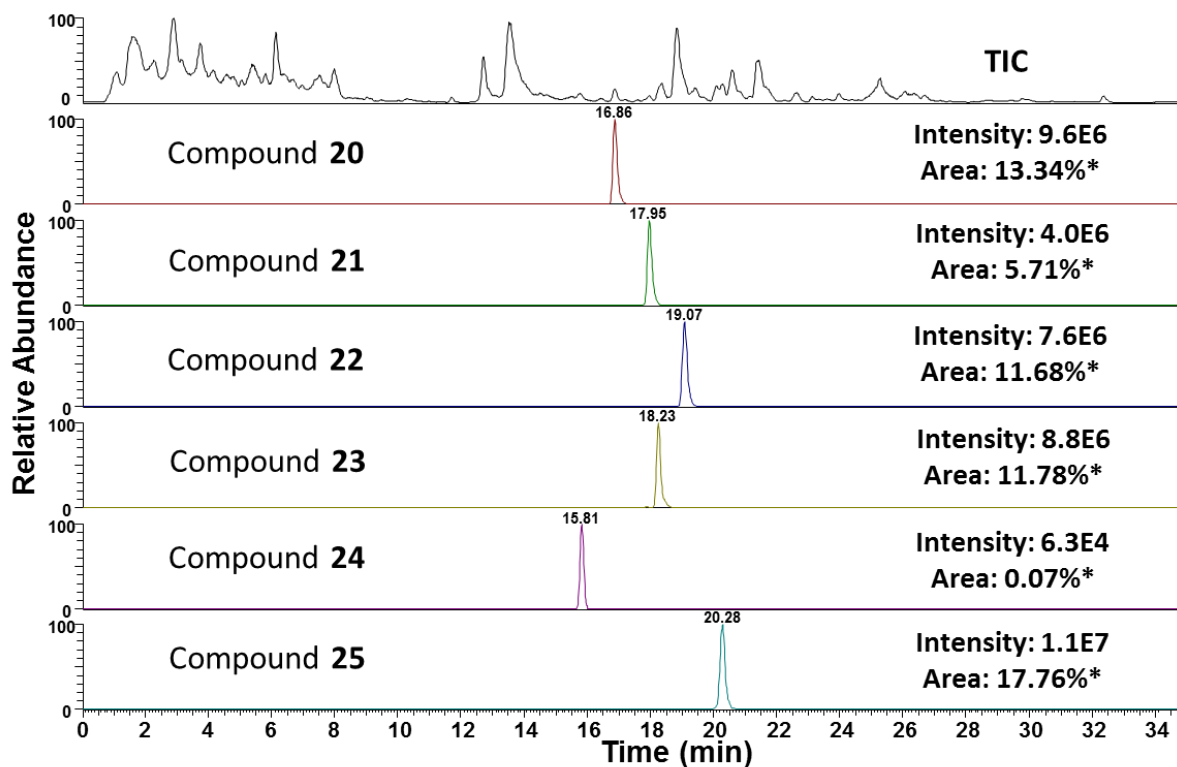

**Fig. S26.** HPLC-HRMS analysis of serratamolides (**26-30**). TIC, extracted ion chromatograms of serratamolides, and area in comparison to the main metabolite serrawettin W1\*.

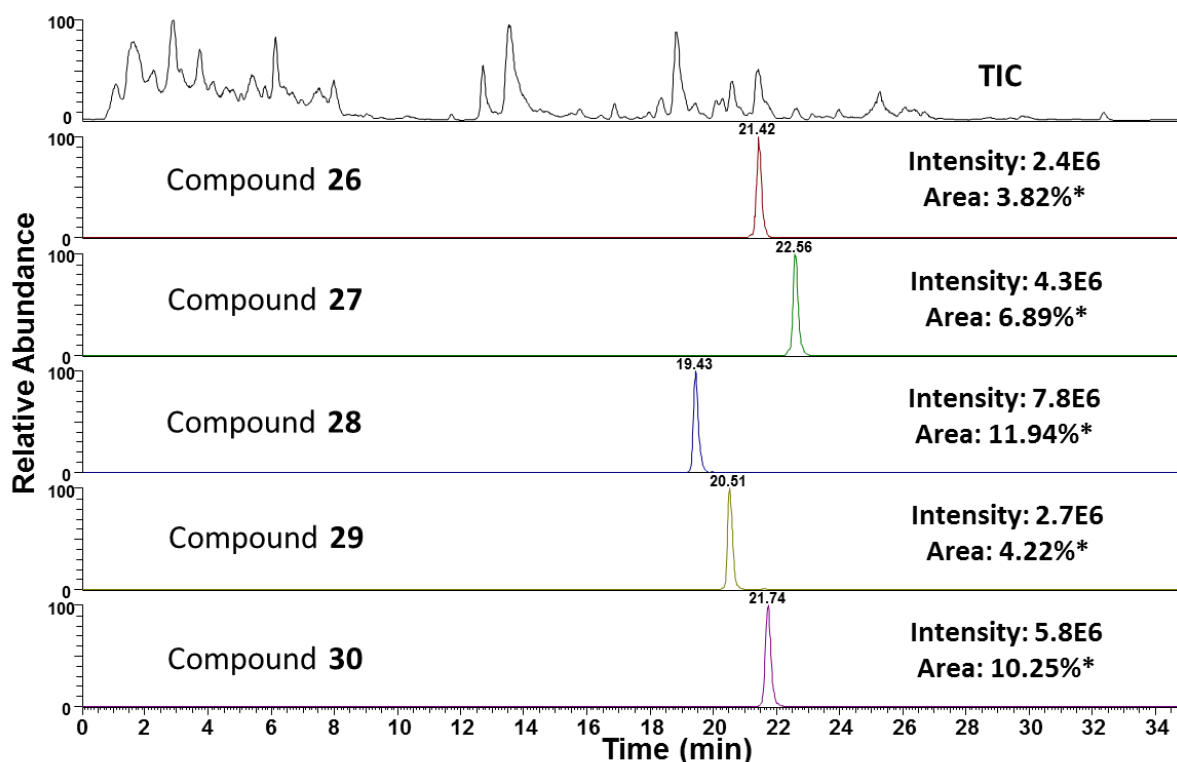



**Fig. S27.** HPLC-HRMS analysis of serratamolides (**31-33**). TIC, extracted ion chromatograms of serratamolides, and area in comparison to the main metabolite serrawettin W1\*.

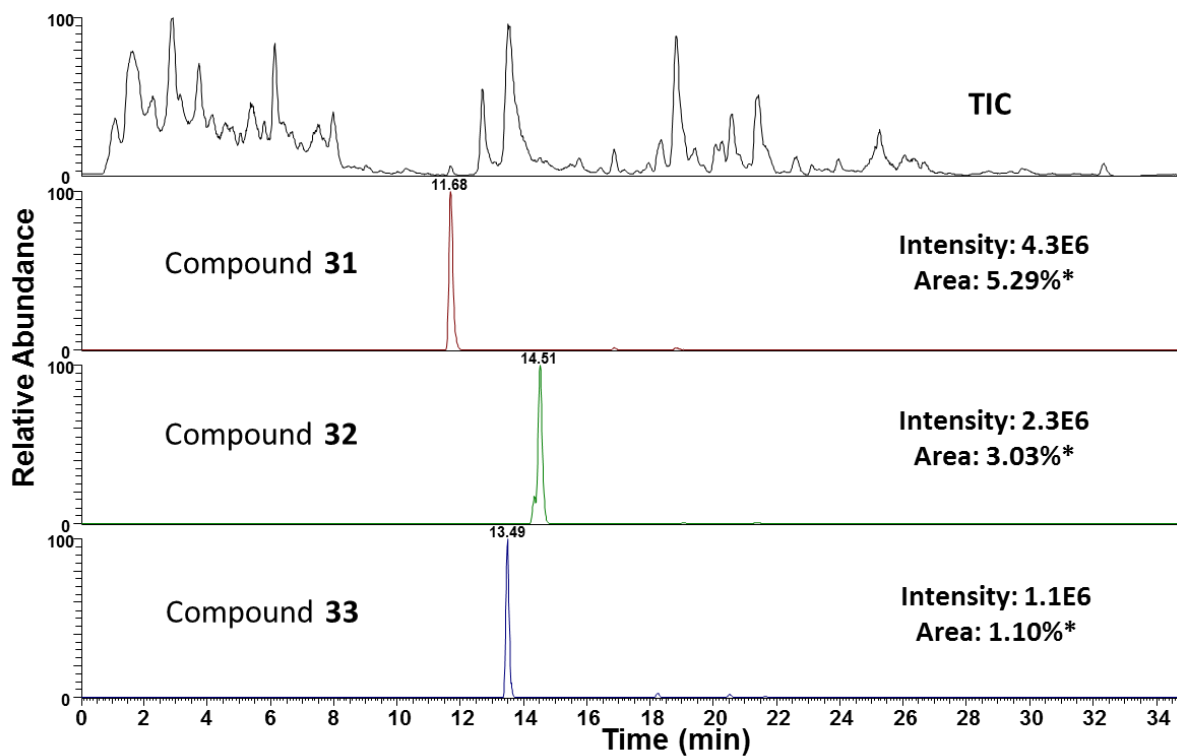

Fig. S28. HRMS<sup>2</sup> of serratamolide C<sub>8</sub>+C<sub>10</sub> (compound **8** [M+H]<sup>+</sup>: *m/z* 487, C<sub>24</sub>H<sub>43</sub>N<sub>2</sub>O<sub>8</sub>).

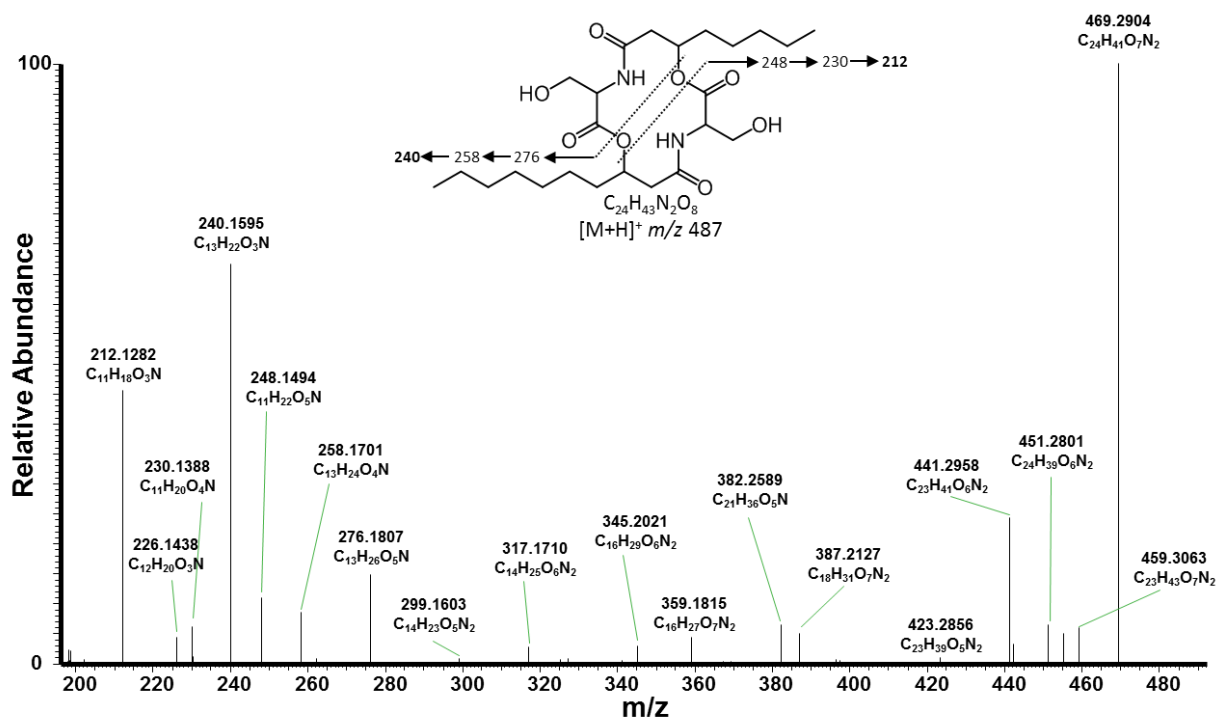

**Fig. S29.** Proposed mass spectral fragmentation pathway of serratamolide C<sub>8</sub>+C<sub>10</sub> (compound **8** [M+H]<sup>+</sup>: *m/z* 487, C<sub>24</sub>H<sub>43</sub>N<sub>2</sub>O<sub>8</sub>).

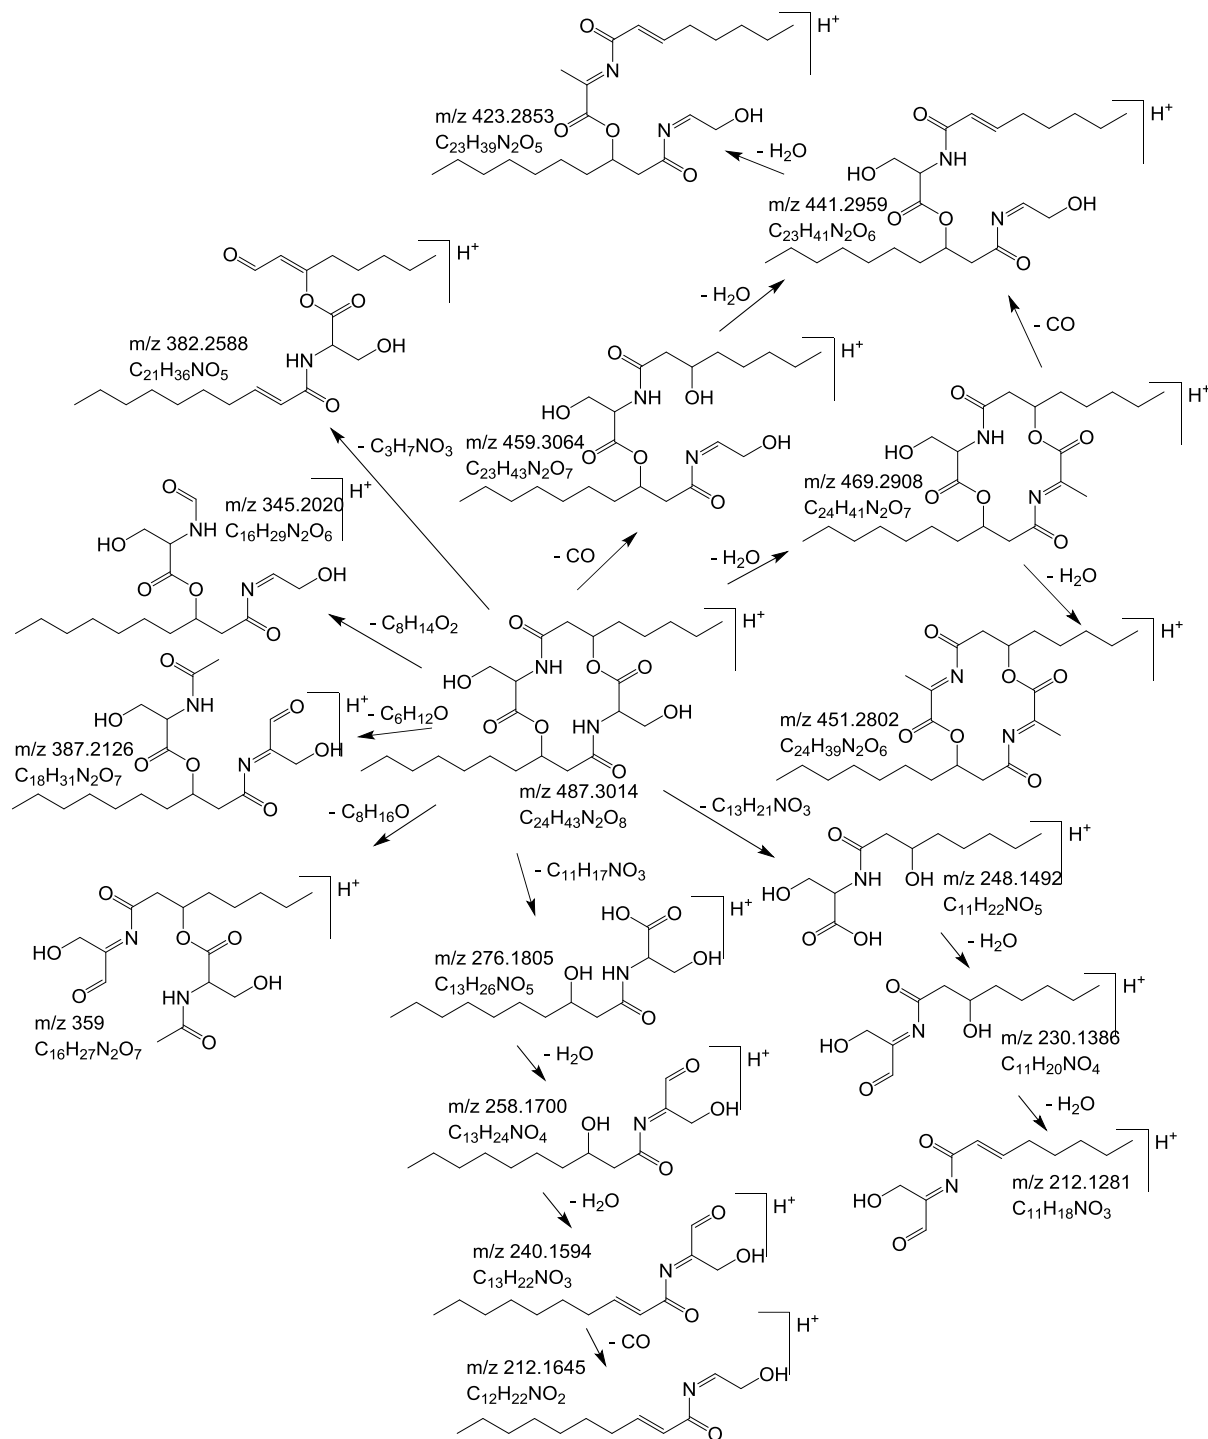

Fig. S30. HRMS<sup>2</sup> of serratamolide C<sub>9</sub>+C<sub>10</sub> (compound **9** [M+H]<sup>+</sup>: *m/z* 501, C<sub>25</sub>H<sub>45</sub>N<sub>2</sub>O<sub>8</sub>).

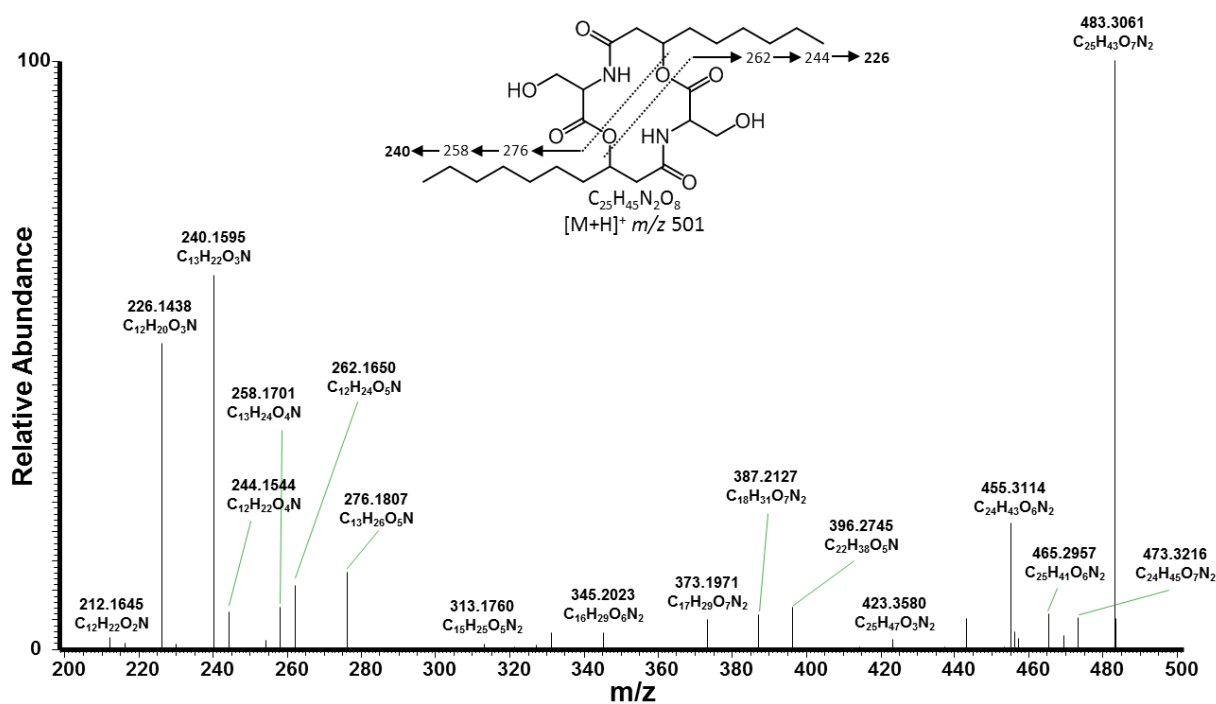

**Fig. S31.** Proposed mass spectral fragmentation pathway of serratamolide C<sub>9</sub>+C<sub>10</sub> (compound **9** [M+H]<sup>+</sup>: *m/z* 501, C<sub>25</sub>H<sub>45</sub>N<sub>2</sub>O<sub>8</sub>).

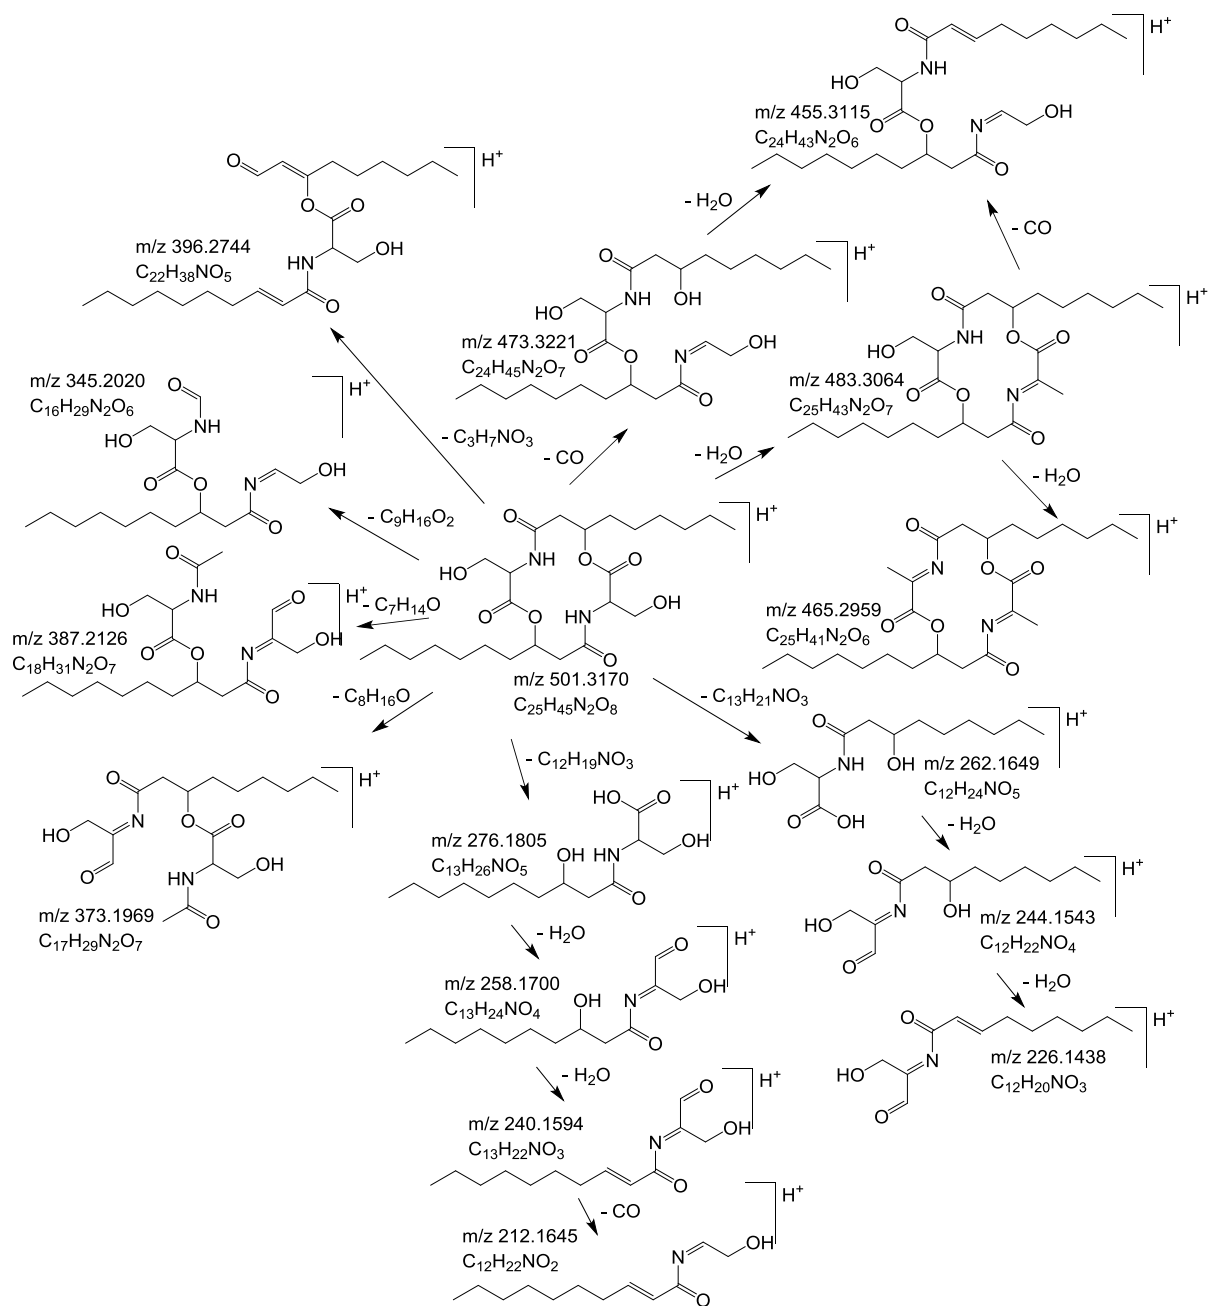

**Fig. S32.** HRMS<sup>2</sup> of serrawettin W1 / serratamolide C<sub>10</sub>+C<sub>10</sub> (compound **10** [M+H]<sup>+</sup>: *m/z* 515, C<sub>26</sub>H<sub>47</sub>N<sub>2</sub>O<sub>8</sub>).

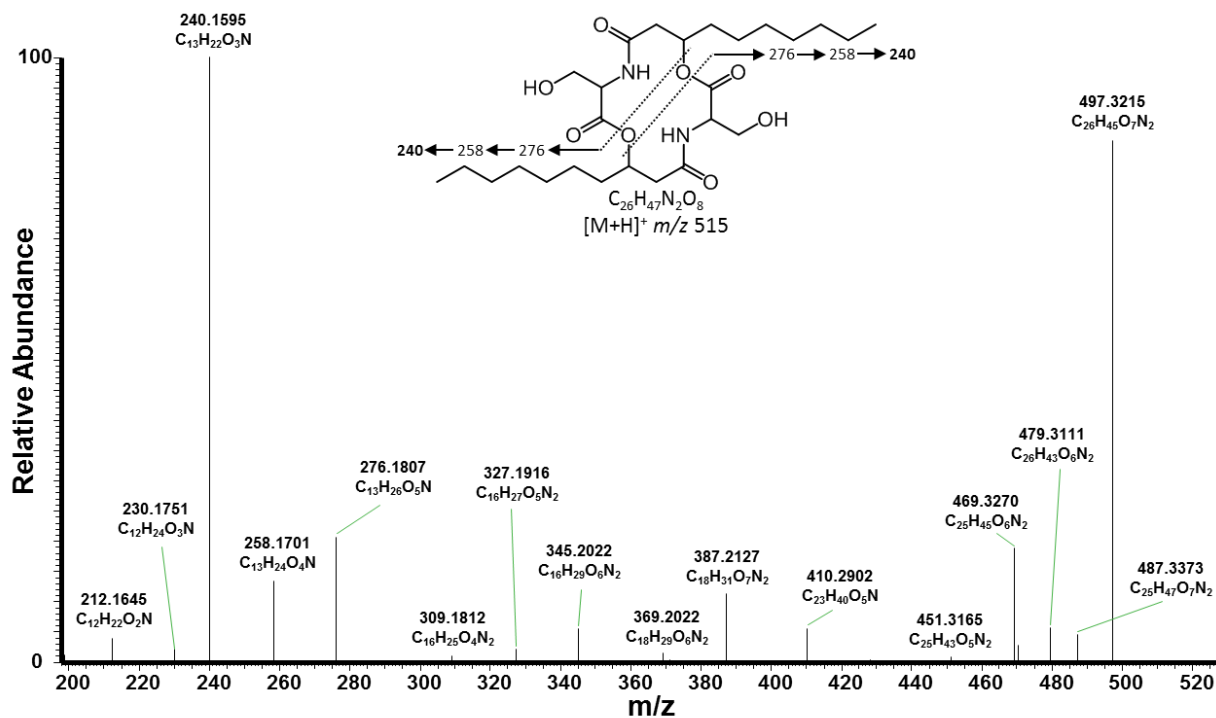

**Fig. S33.** Proposed mass spectral fragmentation pathway of serrawettin W1 / serratamolide  $C_{10}+C_{10}$  (compound **10**  $[M+H]^+$ :  $m/z$  515,  $C_{26}H_{47}N_2O_8$ ).

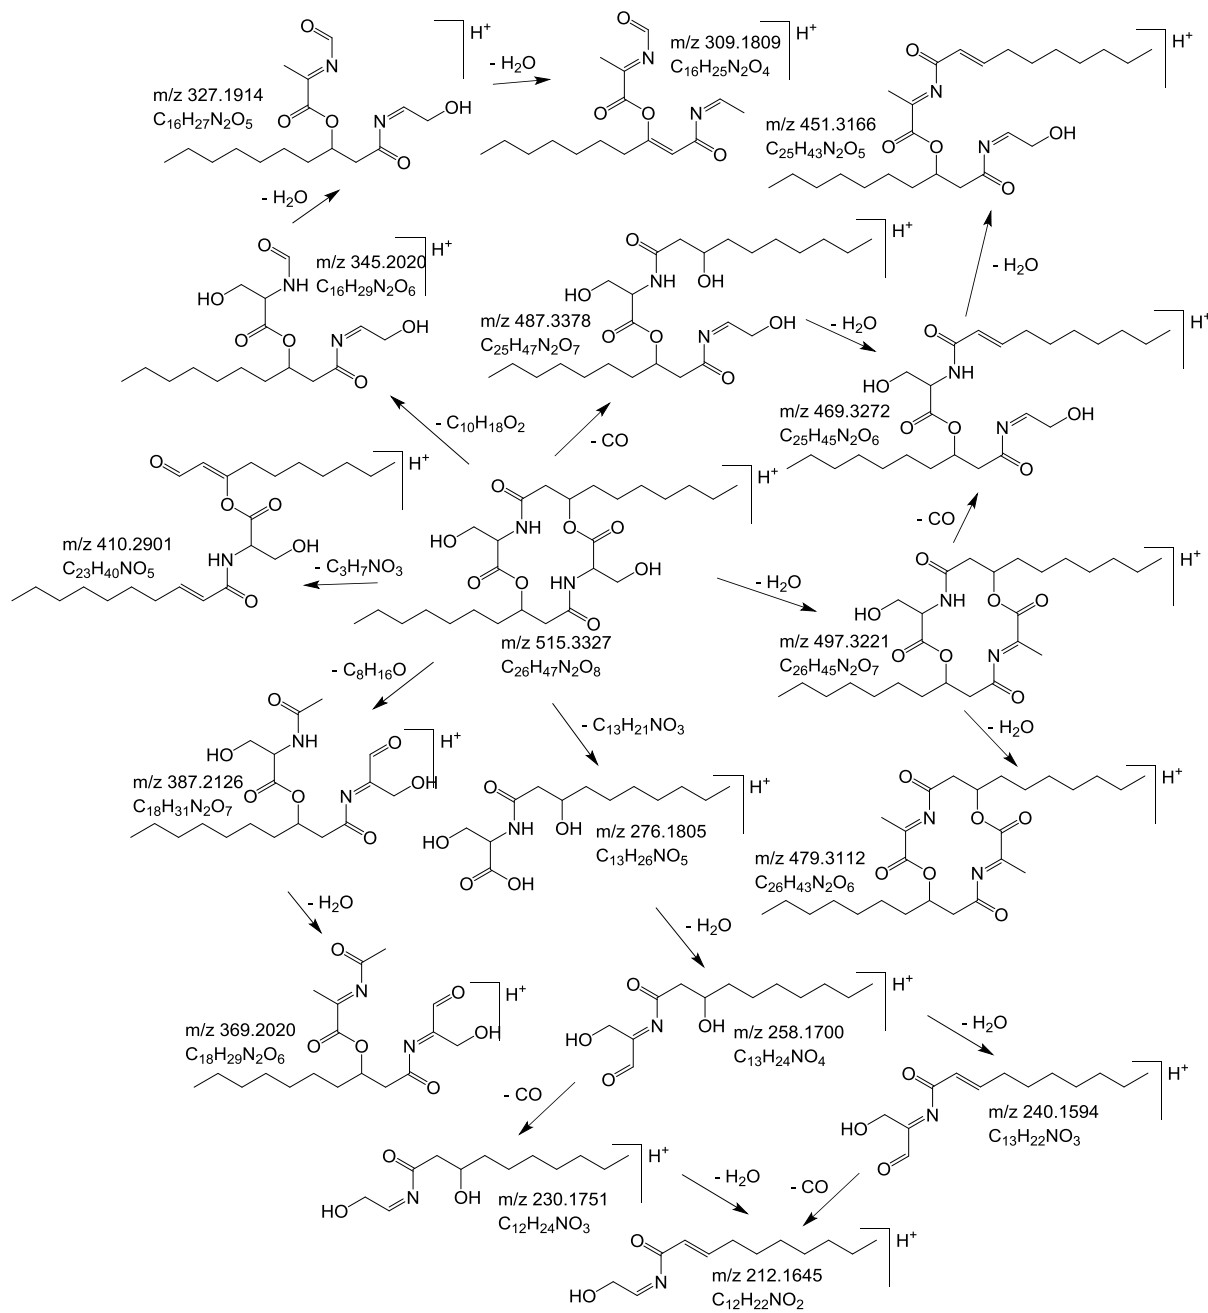

Fig. S34. HRMS<sup>2</sup> of serratamolide C<sub>10</sub>+C<sub>11</sub> (compound **11** [M+H]<sup>+</sup>: *m/z* 529, C<sub>27</sub>H<sub>49</sub>N<sub>2</sub>O<sub>8</sub>).

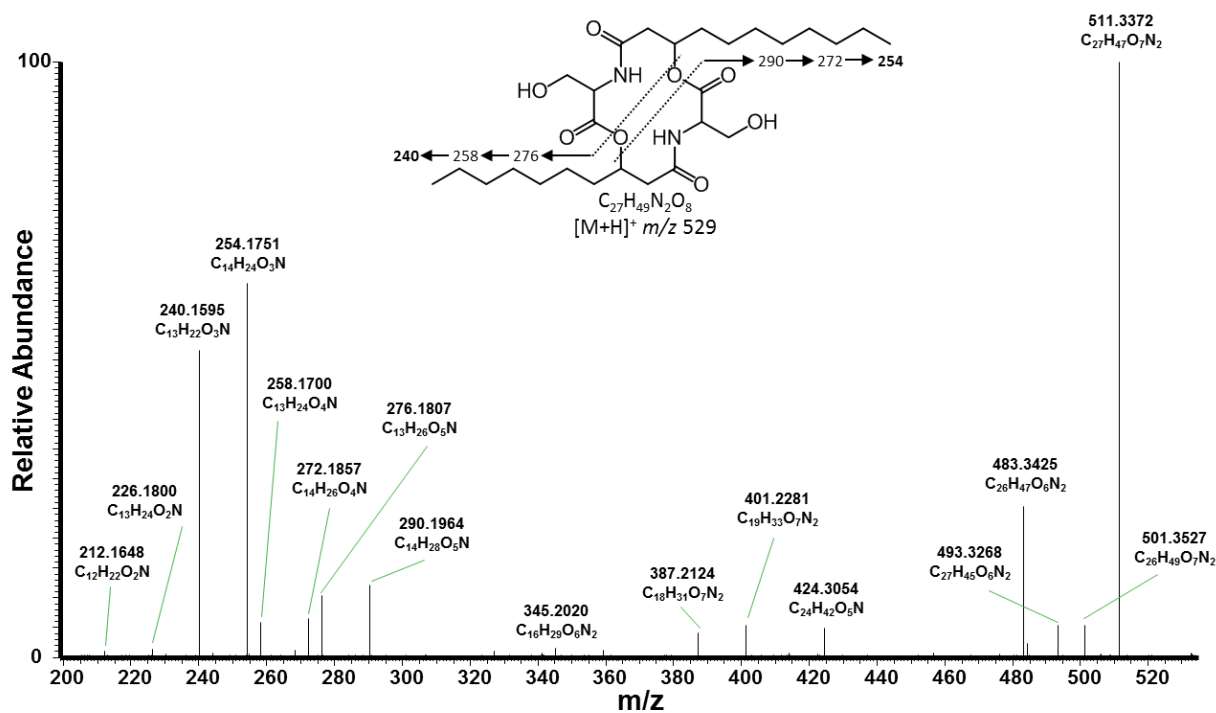





Fig. S36. HRMS<sup>2</sup> of serratamolide C<sub>10</sub>+C<sub>12</sub> (compound **12** [M+H]<sup>+</sup>: *m/z* 543, C<sub>28</sub>H<sub>51</sub>N<sub>2</sub>O<sub>8</sub>).

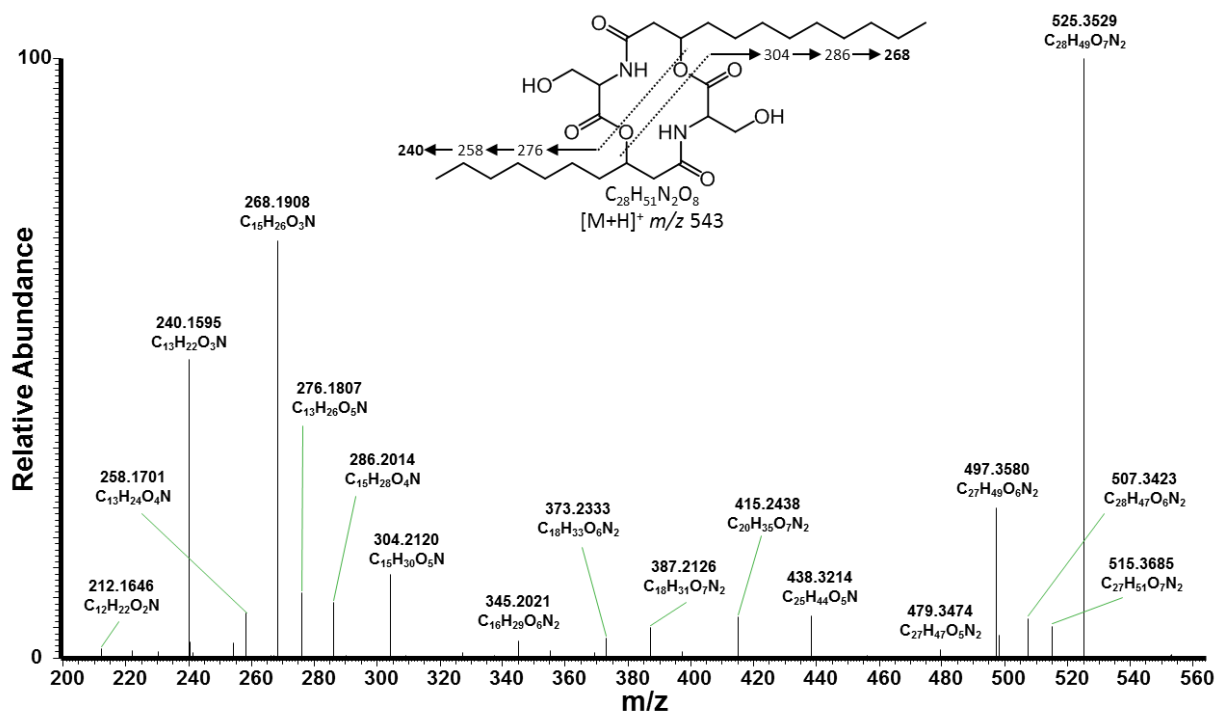

**Fig. S37.** Proposed mass spectral fragmentation pathway of serratamolide  $C_{10}+C_{12}$  (compound 12  $[M+H]^+$ :  $m/z$  543,  $C_{28}H_{51}N_2O_8$ ).

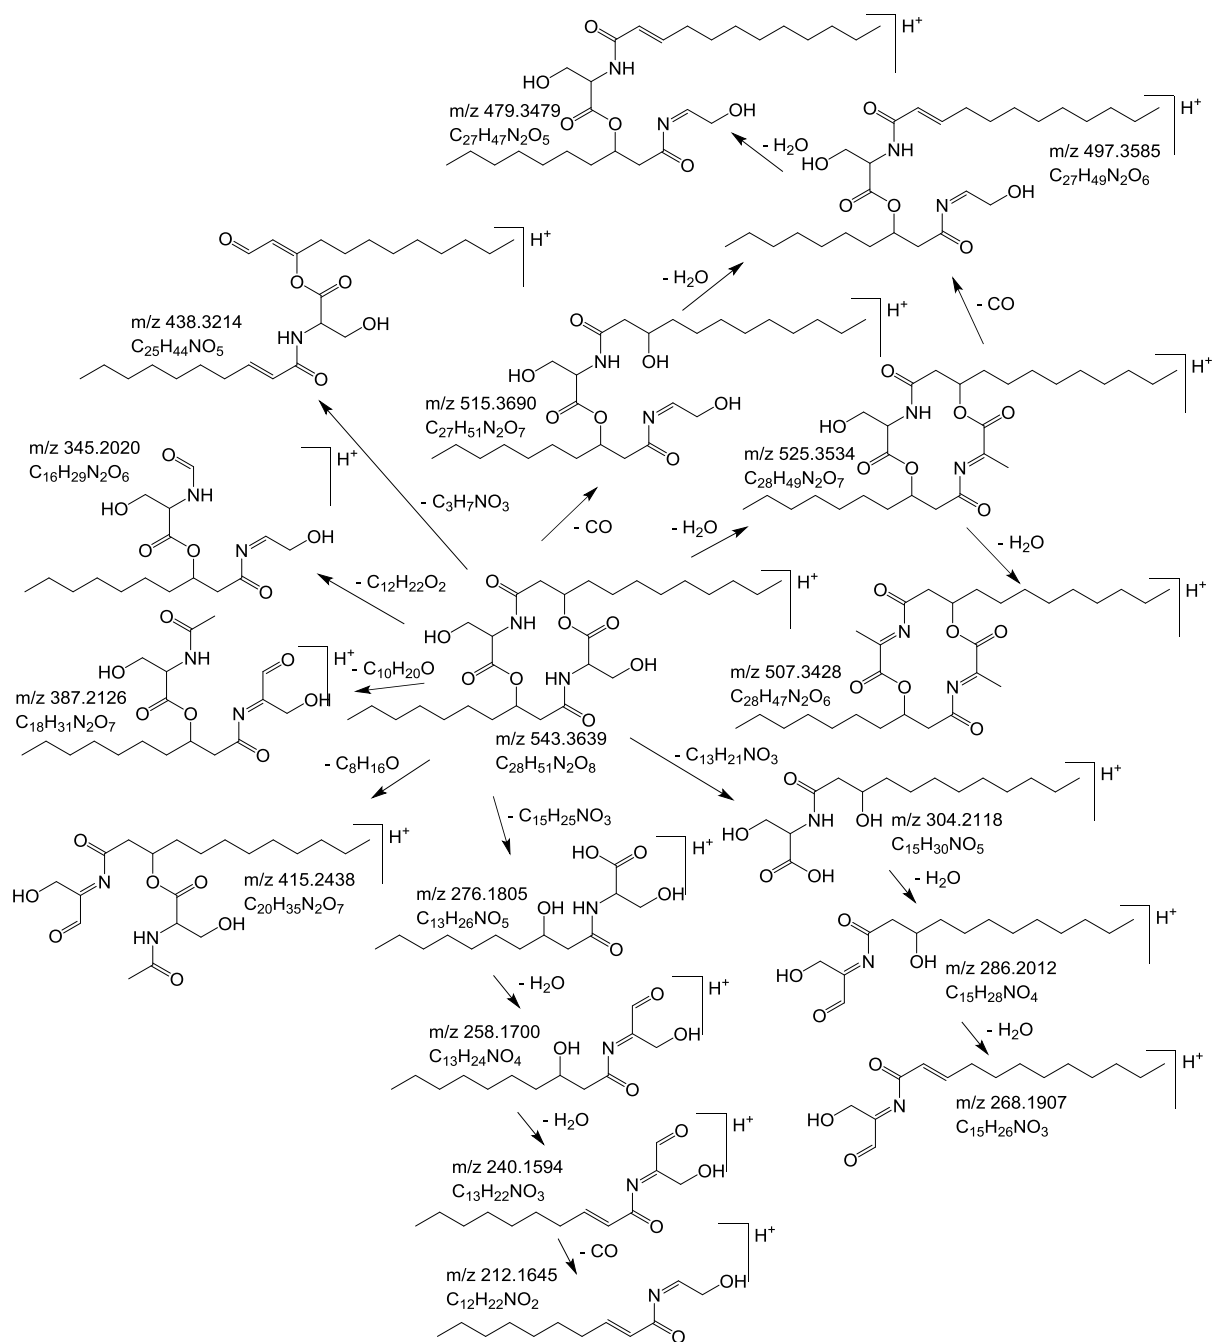

Fig. S38. HRMS<sup>2</sup> of serratamolide C<sub>11</sub>+C<sub>12</sub> (compound **13** [M+H]<sup>+</sup>: *m/z* 557, C<sub>29</sub>H<sub>53</sub>N<sub>2</sub>O<sub>8</sub>).

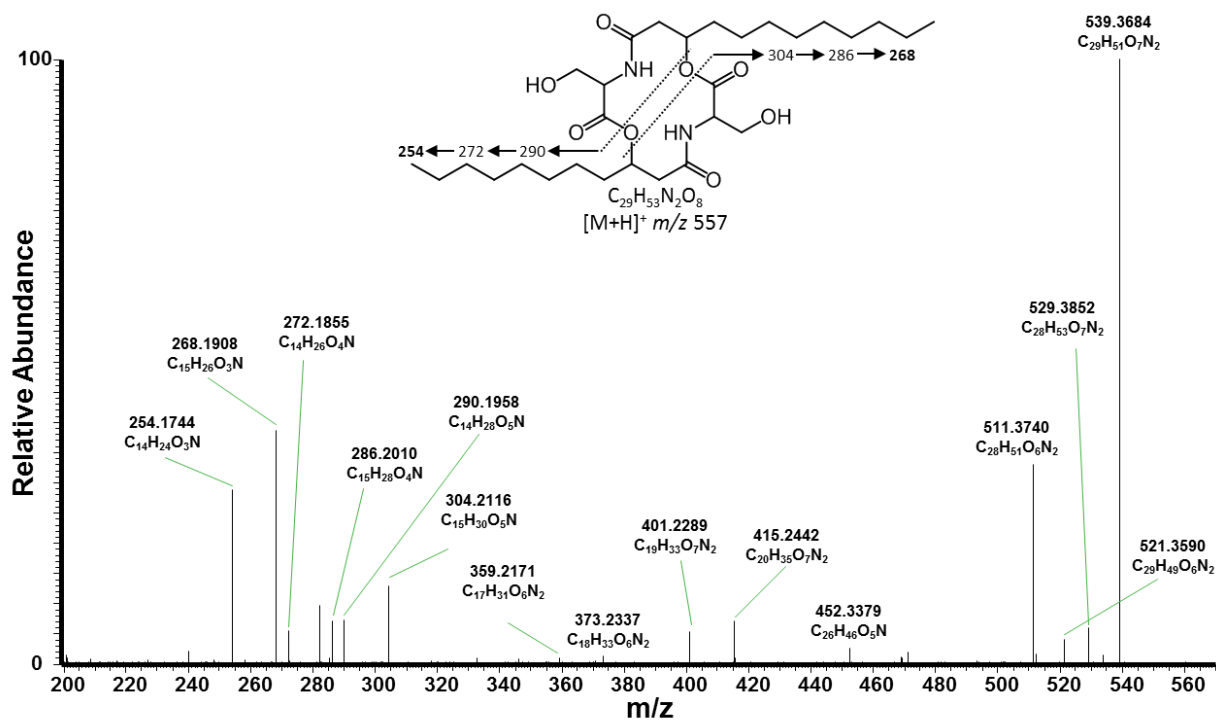

**Fig. S39.** Proposed mass spectral fragmentation pathway of serratamolide C<sub>11</sub>+C<sub>12</sub> (compound **13** [M+H]<sup>+</sup>: m/z 557, C<sub>29</sub>H<sub>53</sub>N<sub>2</sub>O<sub>8</sub>).

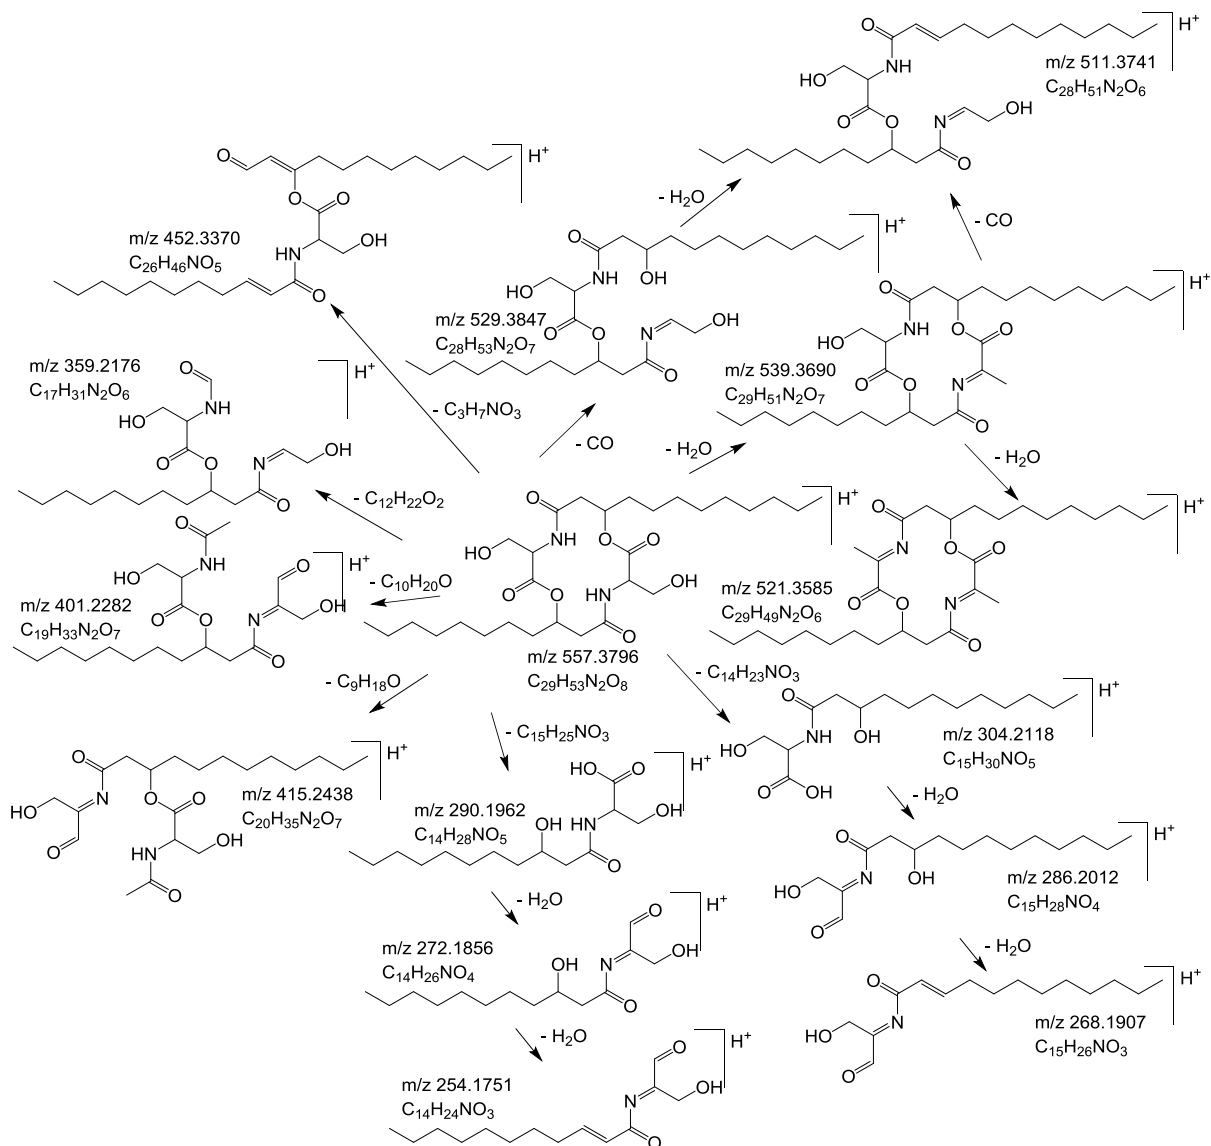

Fig. S40. HRMS<sup>2</sup> of serratamolide C<sub>12</sub>+C<sub>12</sub> (compound **14** [M+H]<sup>+</sup>: m/z 571, C<sub>30</sub>H<sub>55</sub>N<sub>2</sub>O<sub>8</sub>).

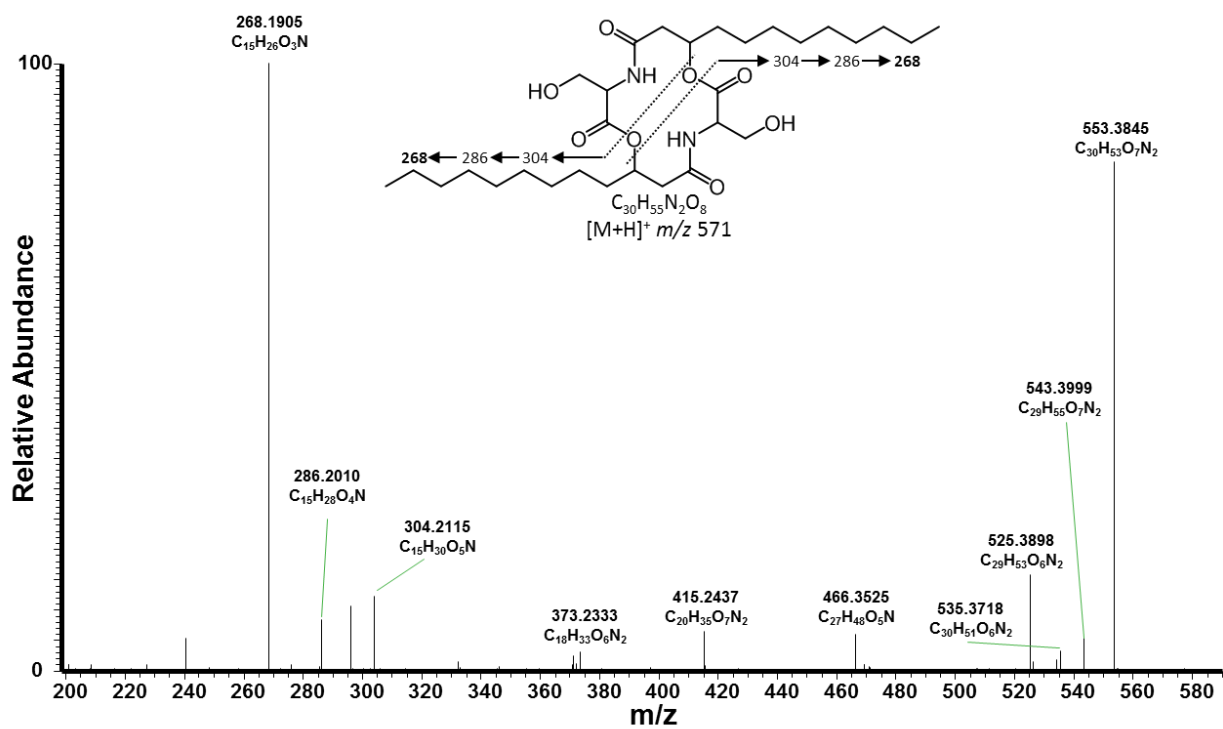

**Fig. S41.** Proposed mass spectral fragmentation pathway of serratamolide C<sub>12</sub>+C<sub>12</sub> (compound **14** [M+H]<sup>+</sup>: m/z 571, C<sub>30</sub>H<sub>55</sub>N<sub>2</sub>O<sub>8</sub>).

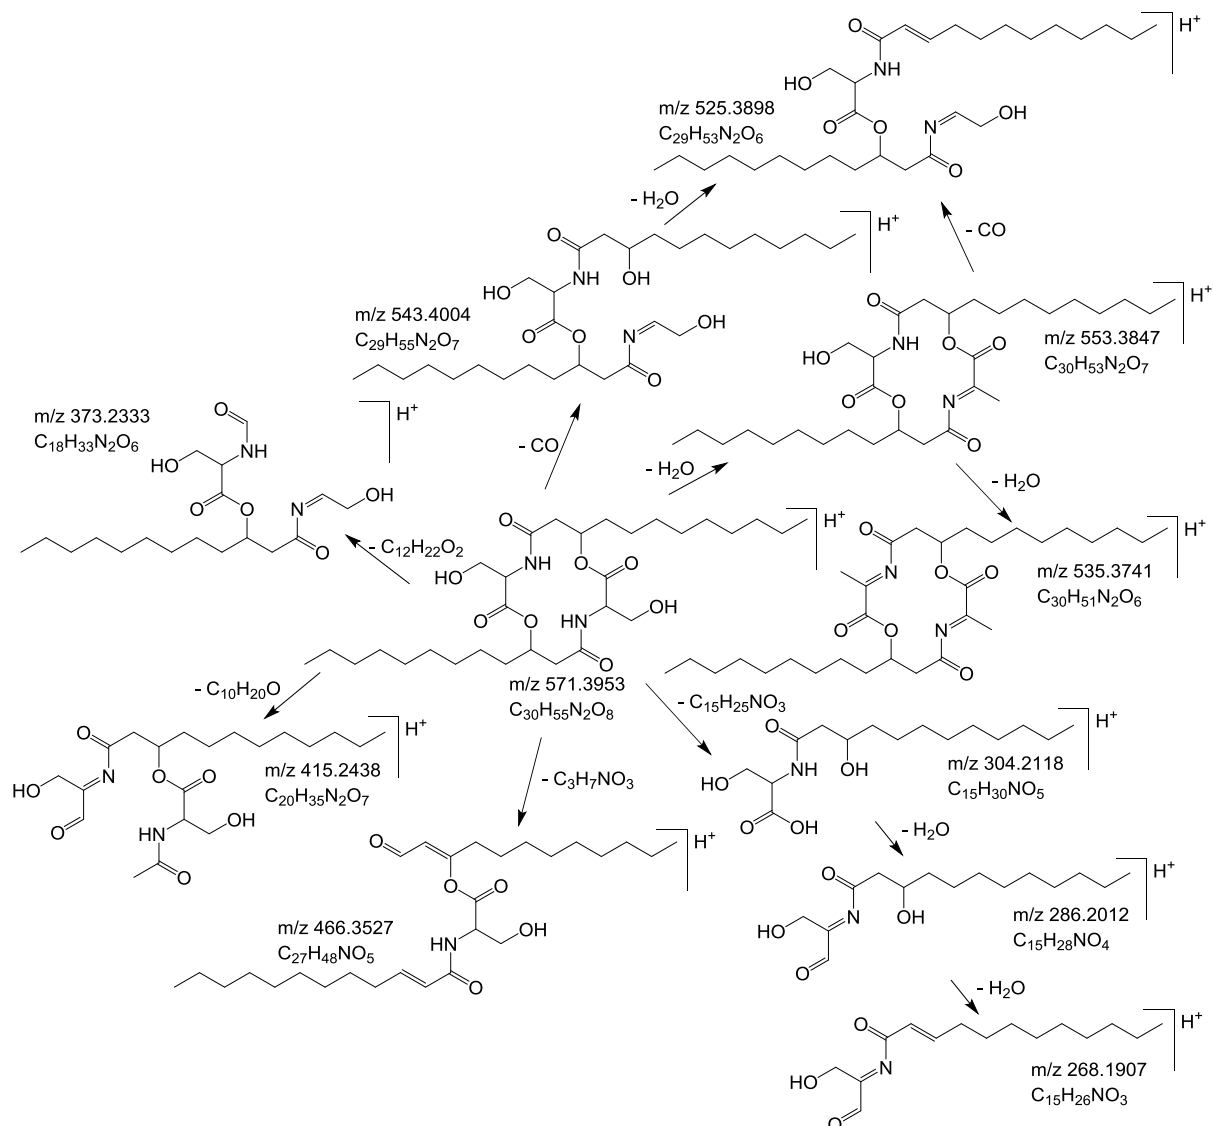

Fig. S42. HRMS<sup>2</sup> of serratamolide C<sub>8</sub>+C<sub>12:1</sub> (compound **15** [M+H]<sup>+</sup>: *m/z* 513, C<sub>26</sub>H<sub>45</sub>N<sub>2</sub>O<sub>8</sub>).

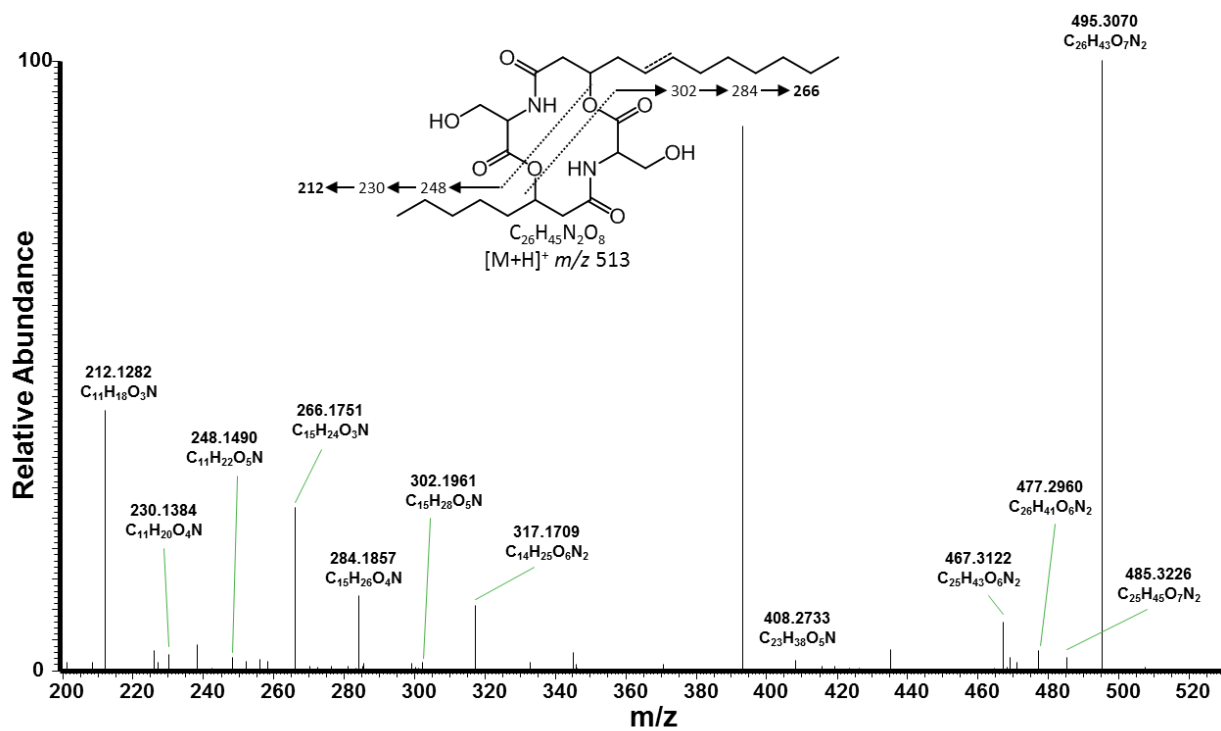



**Fig. S43.** Proposed mass spectral fragmentation pathway of serratamolide C<sub>8</sub>+C<sub>12:1</sub> (compound 15 [M+H]<sup>+</sup>; m/z 513, C<sub>26</sub>H<sub>45</sub>N<sub>2</sub>O<sub>8</sub>).

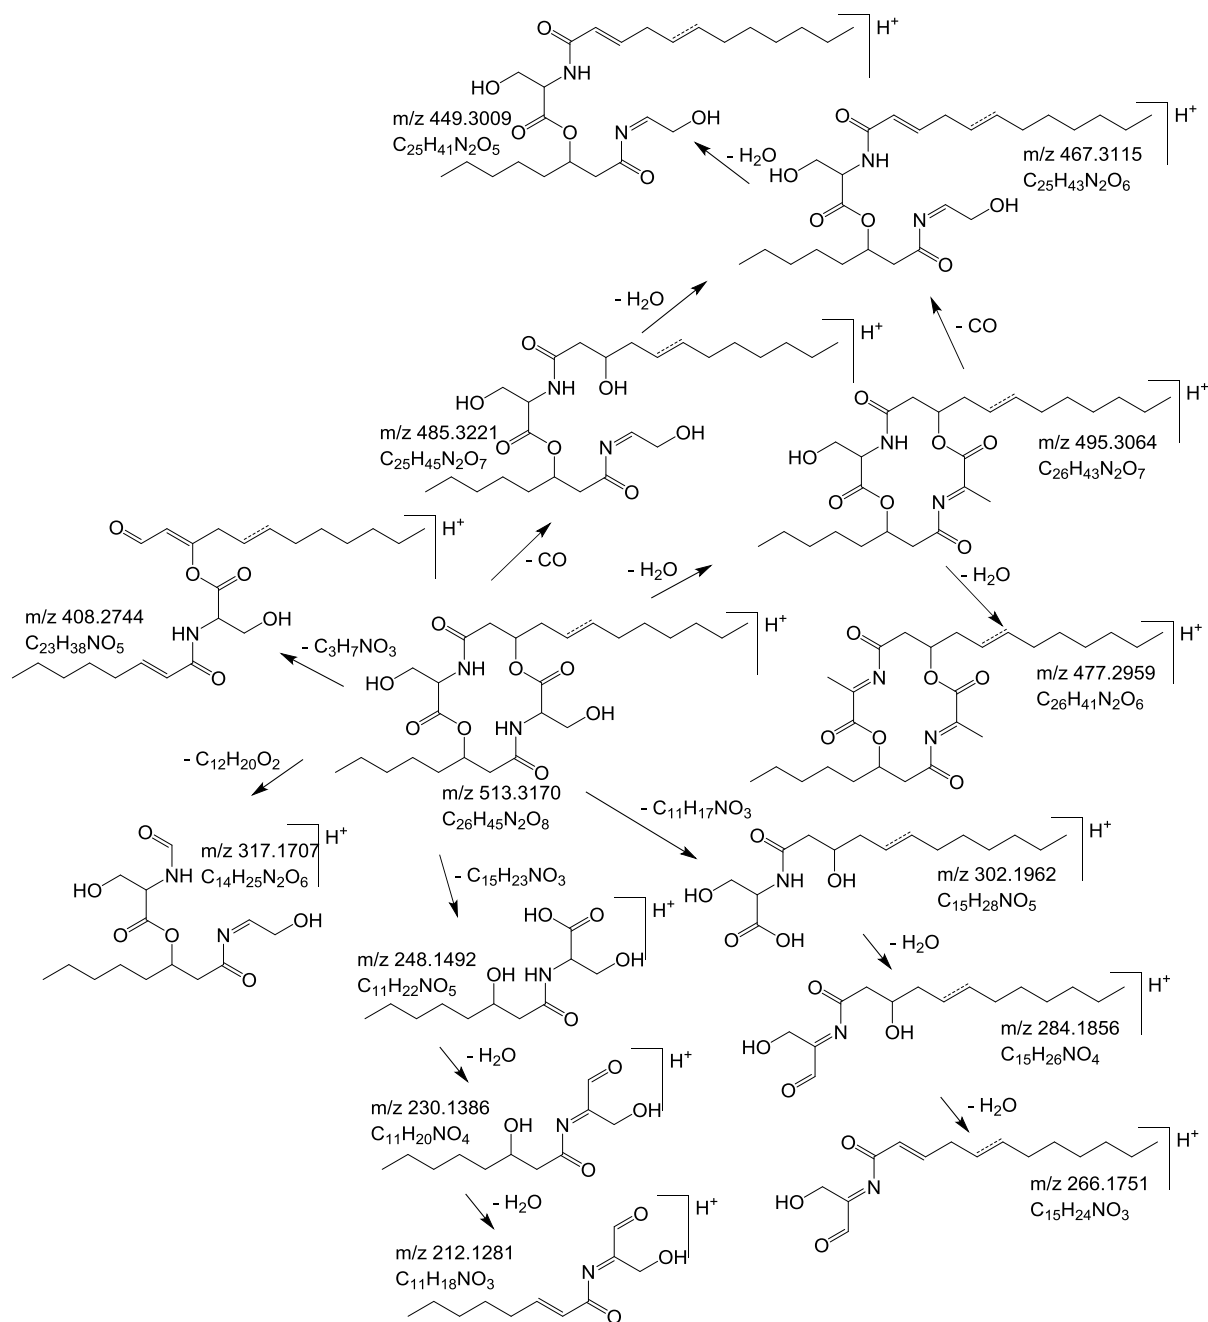

Fig. S44. HRMS<sup>2</sup> of serratamolide C<sub>10</sub>+C<sub>11:1</sub> (compound **16** [M+H]<sup>+</sup>: *m/z* 527, C<sub>27</sub>H<sub>47</sub>N<sub>2</sub>O<sub>8</sub>).

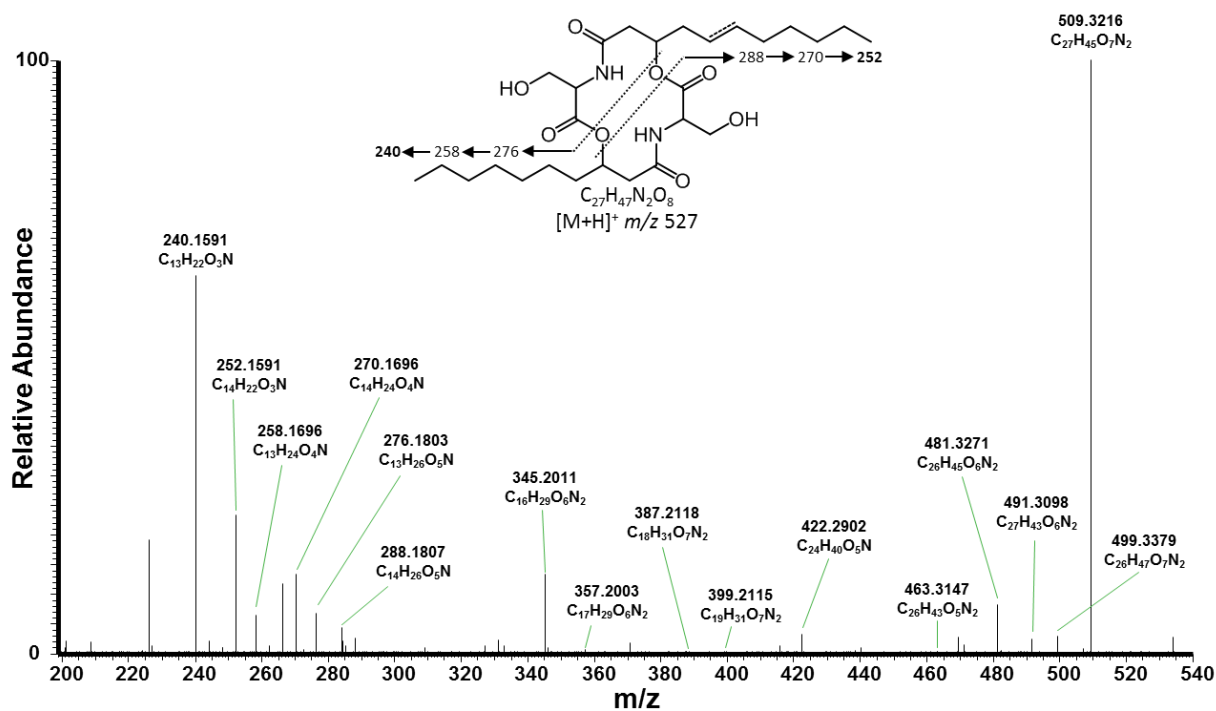

**Fig. S45.** Proposed mass spectral fragmentation pathway of serratamolide C<sub>10</sub>+C<sub>11:1</sub> (compound **16** [M+H]<sup>+</sup>: *m/z* 527, C<sub>27</sub>H<sub>47</sub>N<sub>2</sub>O<sub>8</sub>).

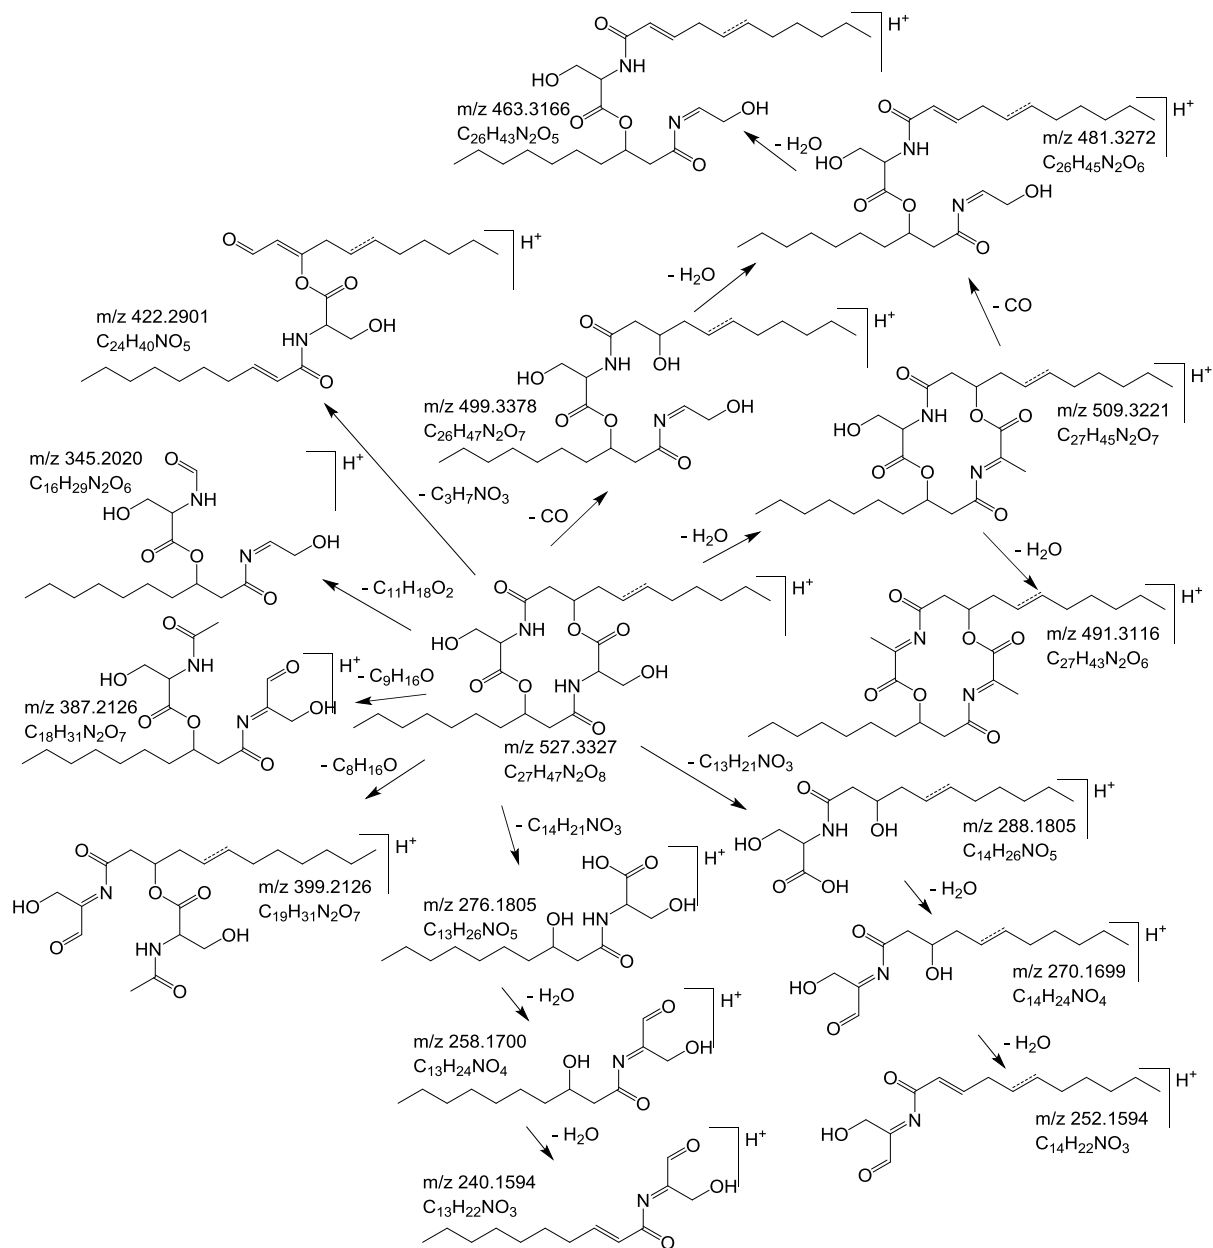

Fig. S46. HRMS<sup>2</sup> of serratamolide C<sub>10</sub>+C<sub>12:1</sub> (compound **17** [M+H]<sup>+</sup>: *m/z* 541, C<sub>28</sub>H<sub>49</sub>N<sub>2</sub>O<sub>8</sub>).

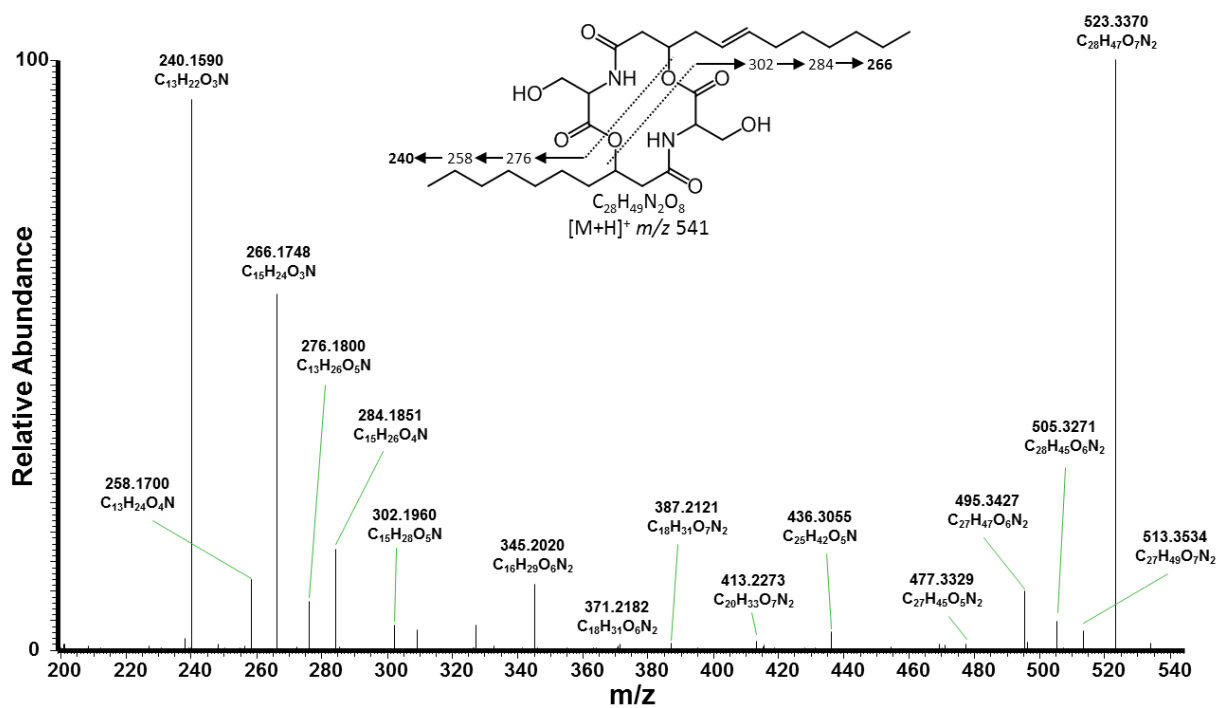



Fig. S48. HRMS<sup>2</sup> of serratamolide C<sub>11</sub>+C<sub>12:1</sub> (compound **18** [M+H]<sup>+</sup>: *m/z* 555, C<sub>29</sub>H<sub>51</sub>N<sub>2</sub>O<sub>8</sub>).

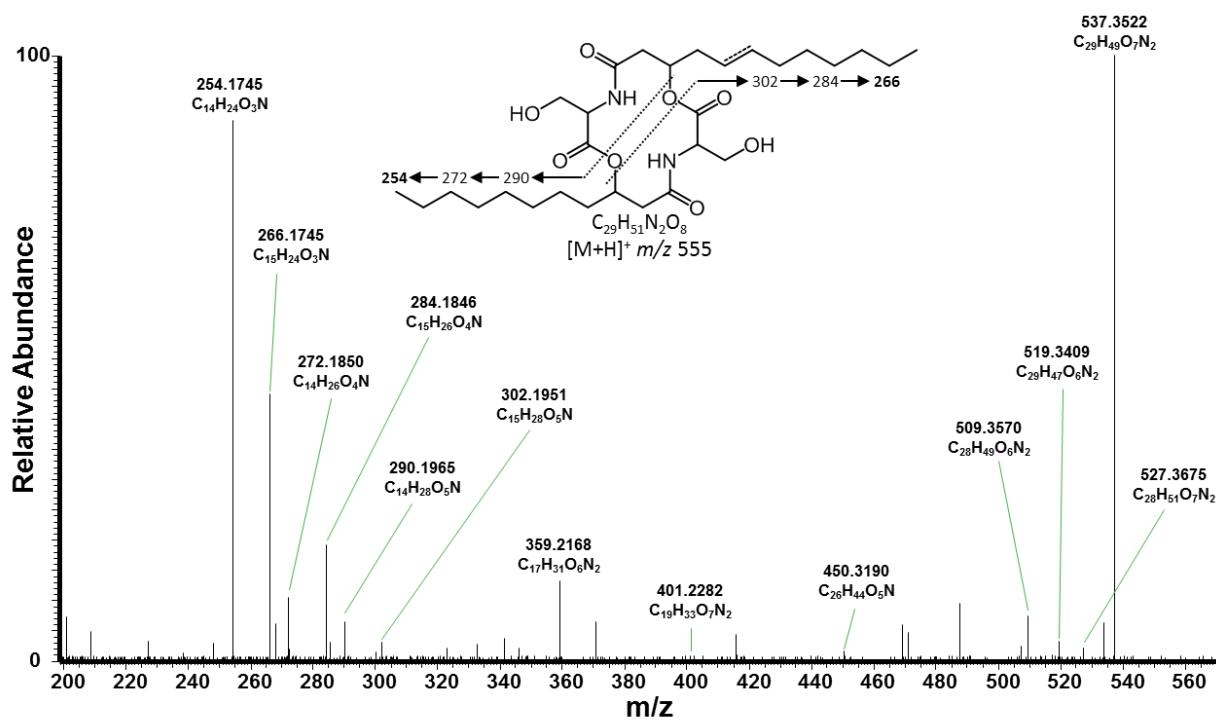

**Fig. S49.** Proposed mass spectral fragmentation pathway of serratamolide C<sub>11</sub>+C<sub>12</sub>:1 (compound **18** [M+H]<sup>+</sup>: *m/z* 555, C<sub>29</sub>H<sub>51</sub>N<sub>2</sub>O<sub>8</sub>).

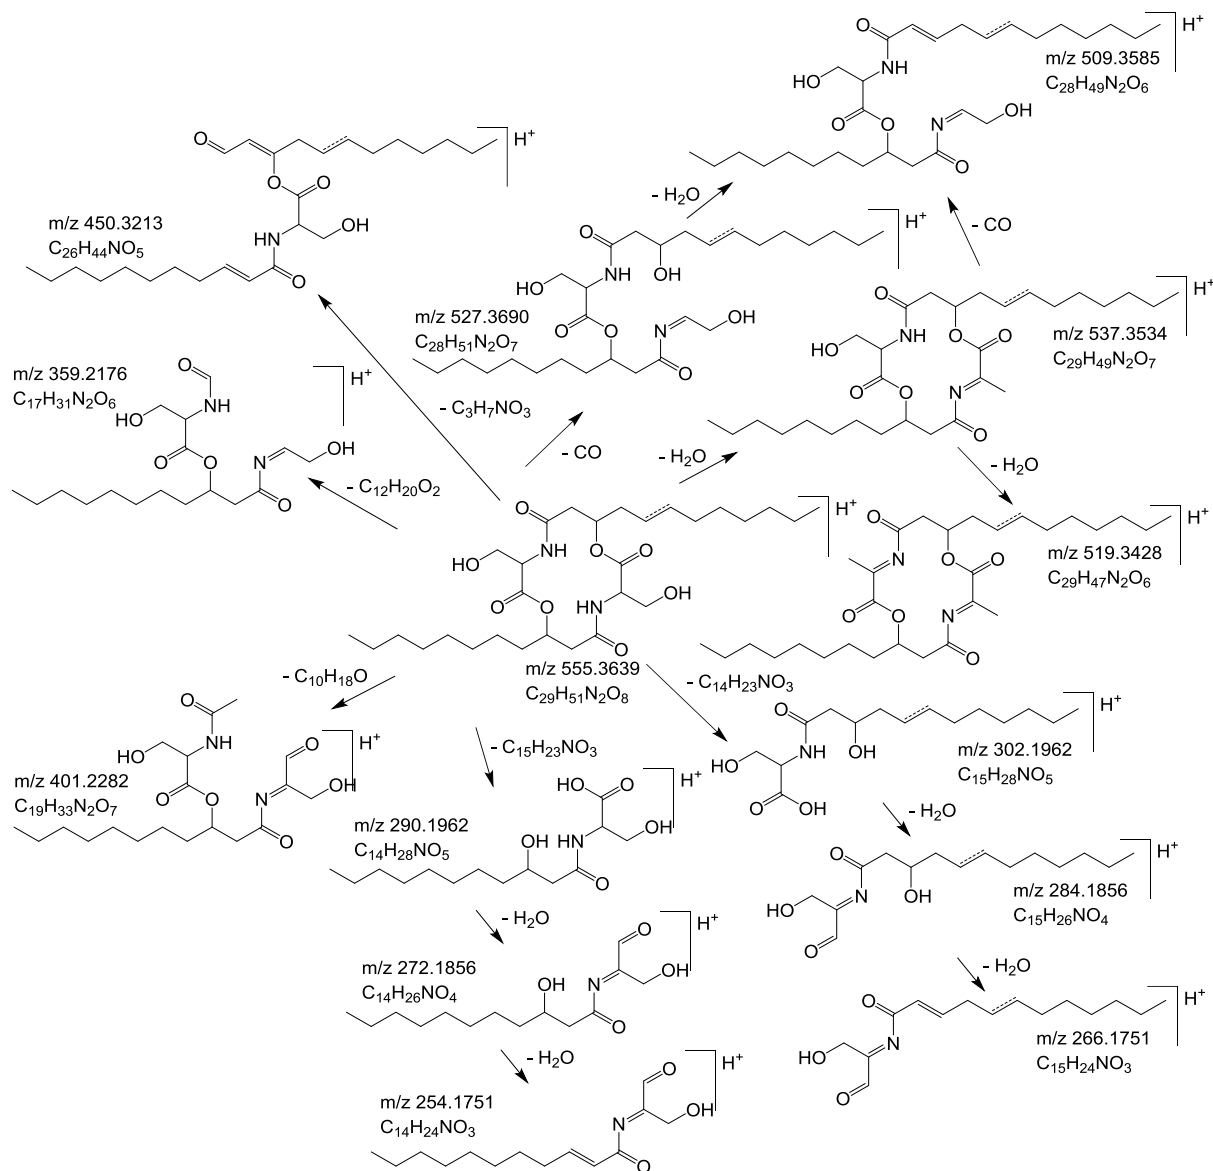

Fig. S50. HRMS<sup>2</sup> of serratamolide C<sub>12</sub>+C<sub>12:1</sub> (compound **19** [M+H]<sup>+</sup>: *m/z* 569, C<sub>30</sub>H<sub>53</sub>N<sub>2</sub>O<sub>8</sub>).

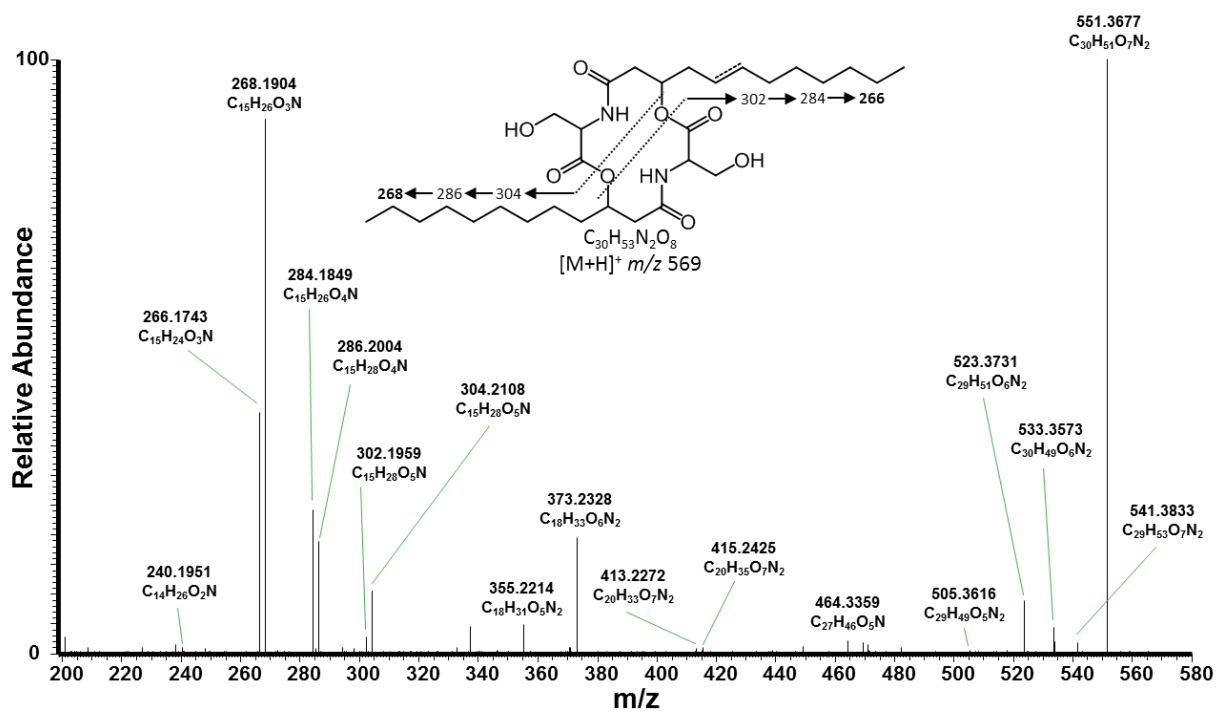



**Fig. S51.** Proposed mass spectral fragmentation pathway of serratamolide C<sub>12</sub>+C<sub>12:1</sub> (compound **19** [M+H]<sup>+</sup>: m/z 569, C<sub>30</sub>H<sub>53</sub>N<sub>2</sub>O<sub>8</sub>).

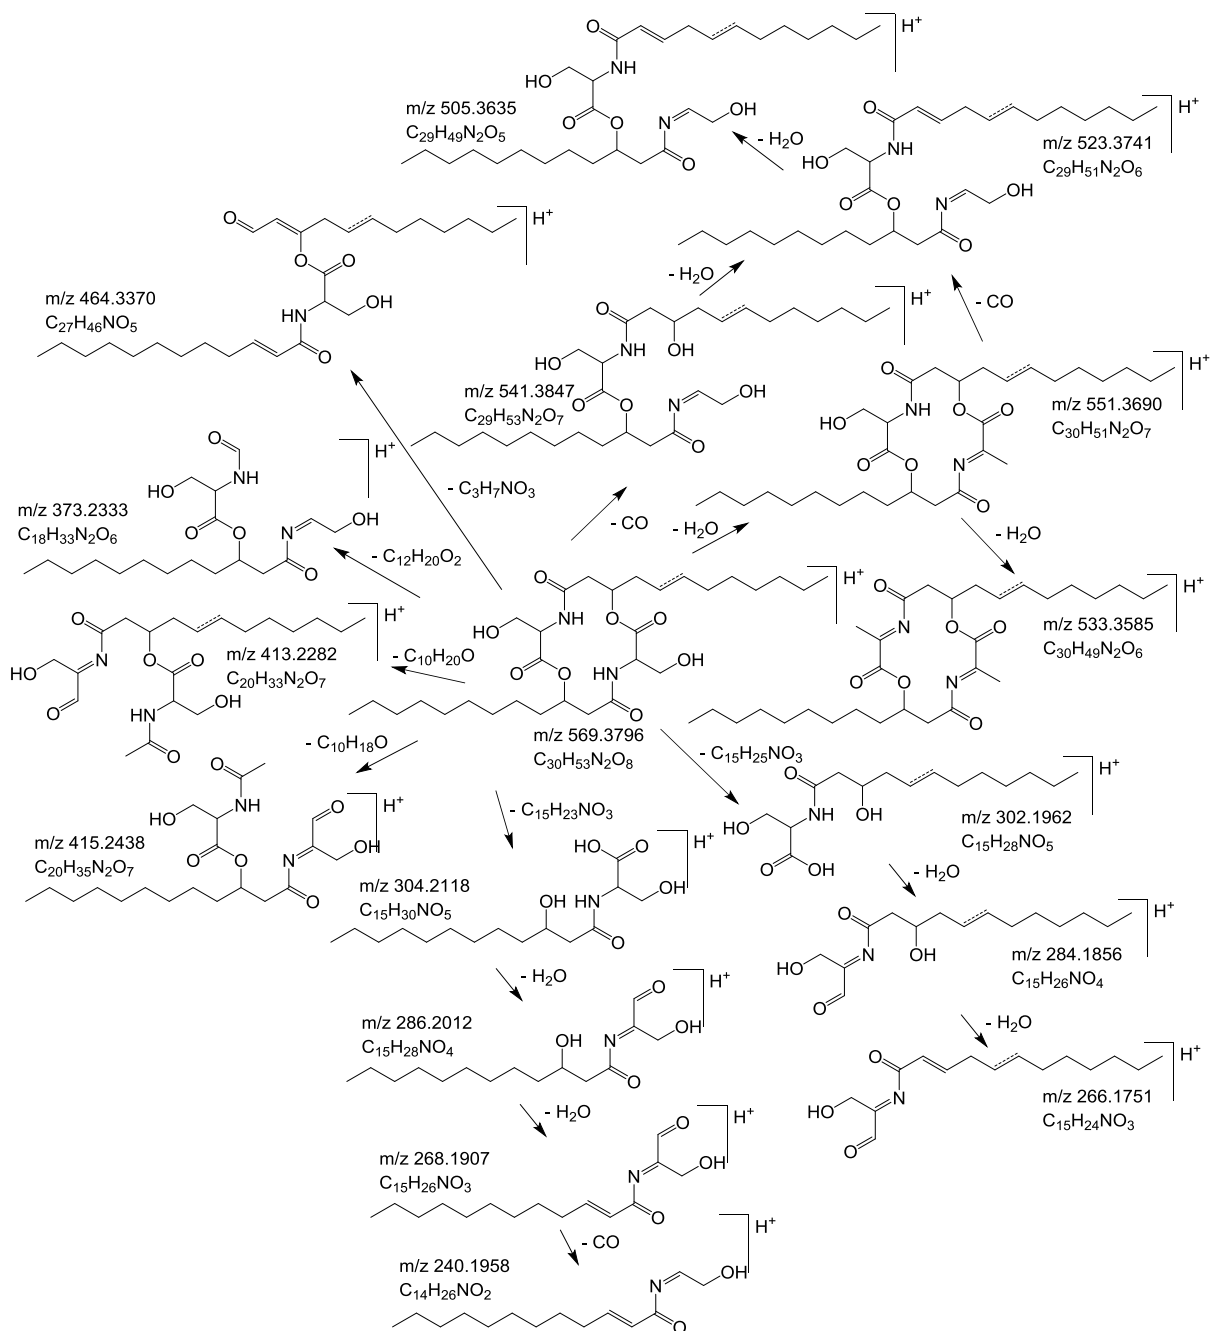

**Fig. S52.** HRMS<sup>2</sup> of ring-opened serratamolide C<sub>10</sub>+C<sub>10</sub> (compound **20** [M+H]<sup>+</sup>: *m/z* 533, C<sub>26</sub>H<sub>49</sub>N<sub>2</sub>O<sub>9</sub>).

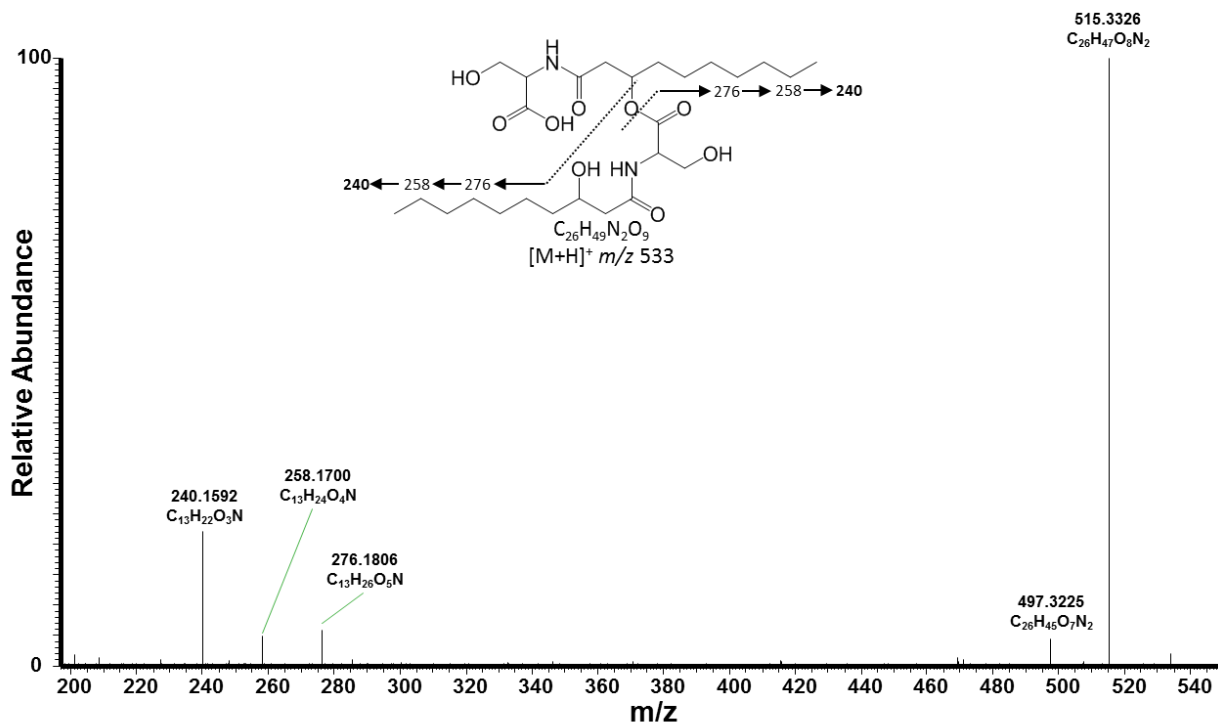

**Fig. S53.** Proposed mass spectral fragmentation pathway of ring-opened serratamolide C<sub>10</sub>+C<sub>10</sub> (compound **20** [M+H]<sup>+</sup>: *m/z* 533, C<sub>26</sub>H<sub>49</sub>N<sub>2</sub>O<sub>9</sub>).

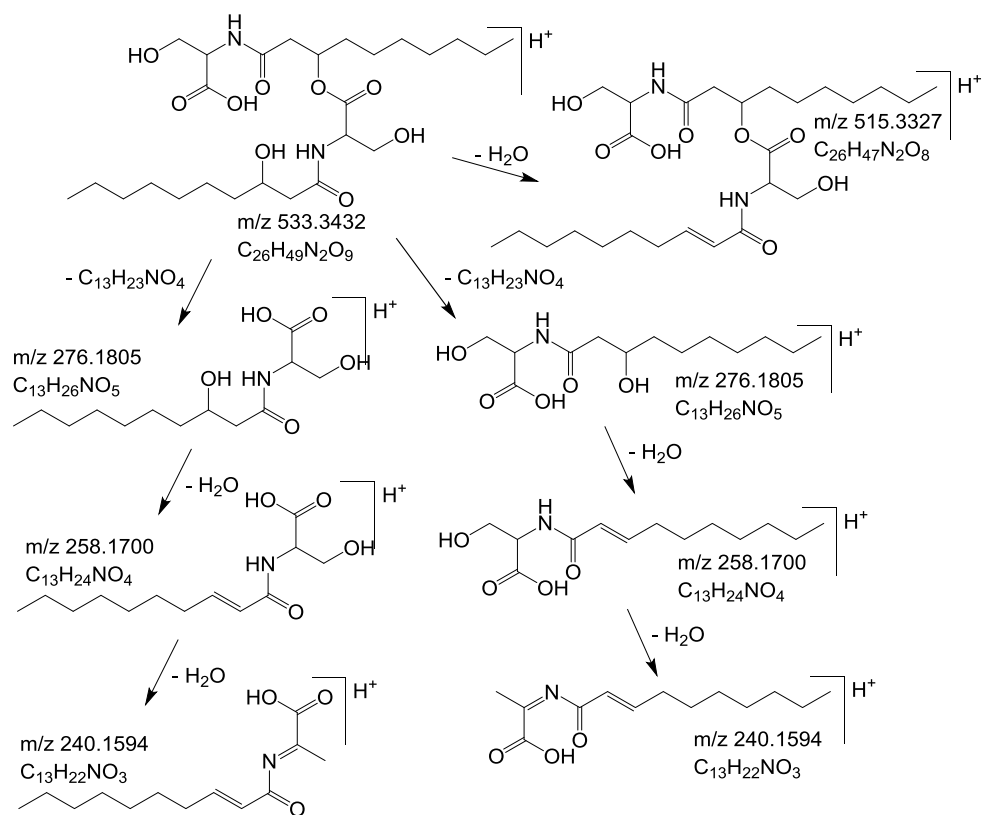

**Fig. S54.** HRMS<sup>2</sup> of ring-opened serratamolide C<sub>10</sub>+C<sub>11</sub> (compound **21** [M+H]<sup>+</sup>: *m/z* 547, C<sub>27</sub>H<sub>51</sub>N<sub>2</sub>O<sub>9</sub>).

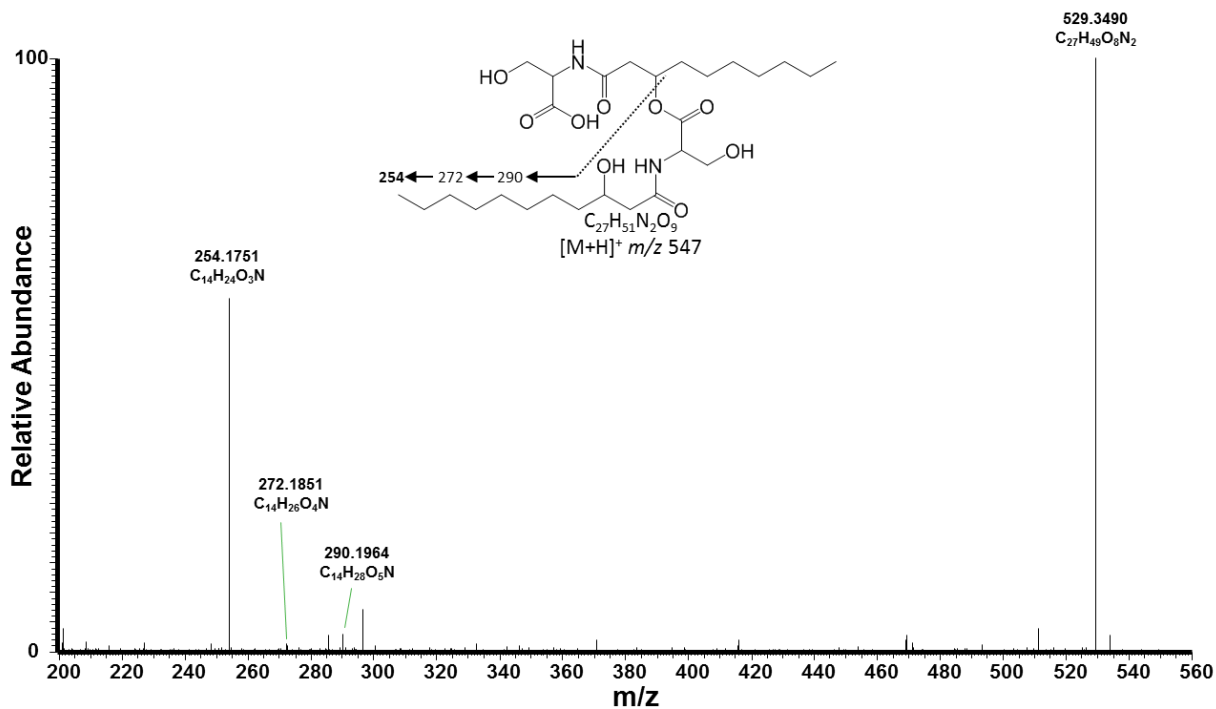

**Fig. S55.** Proposed mass spectral fragmentation pathway of ring-opened serratamolide C<sub>10</sub>+C<sub>11</sub> (compound **21** [M+H]<sup>+</sup>: *m/z* 547, C<sub>27</sub>H<sub>51</sub>N<sub>2</sub>O<sub>9</sub>).

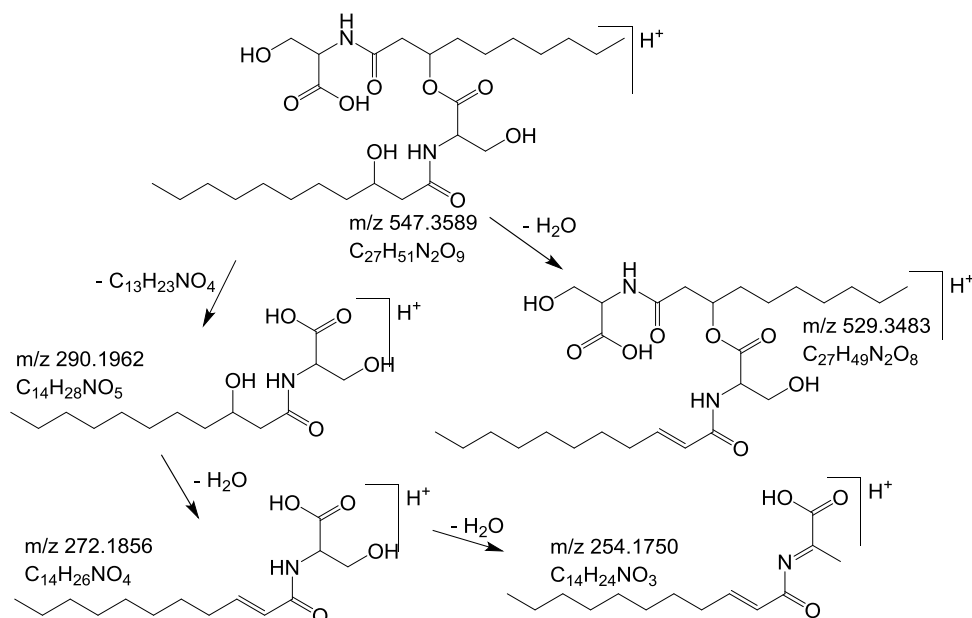

**Fig. S56.** HRMS<sup>2</sup> of ring-opened serratamolide C<sub>10</sub>+C<sub>12</sub> (compound **22** [M+H]<sup>+</sup>: *m/z* 561, C<sub>28</sub>H<sub>53</sub>N<sub>2</sub>O<sub>9</sub>).

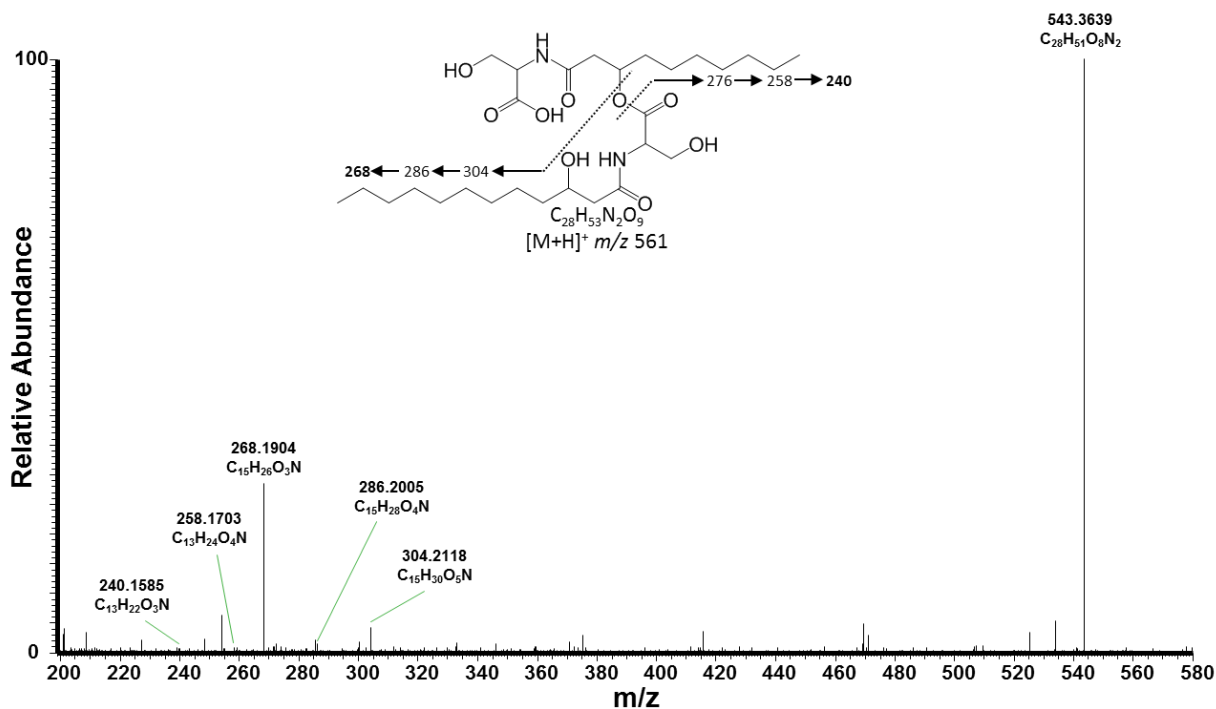

**Fig. S57.** Proposed mass spectral fragmentation pathway of ring-opened serratamolide C<sub>10</sub>+C<sub>12</sub> (compound **22** [M+H]<sup>+</sup>: *m/z* 561, C<sub>28</sub>H<sub>53</sub>N<sub>2</sub>O<sub>9</sub>).

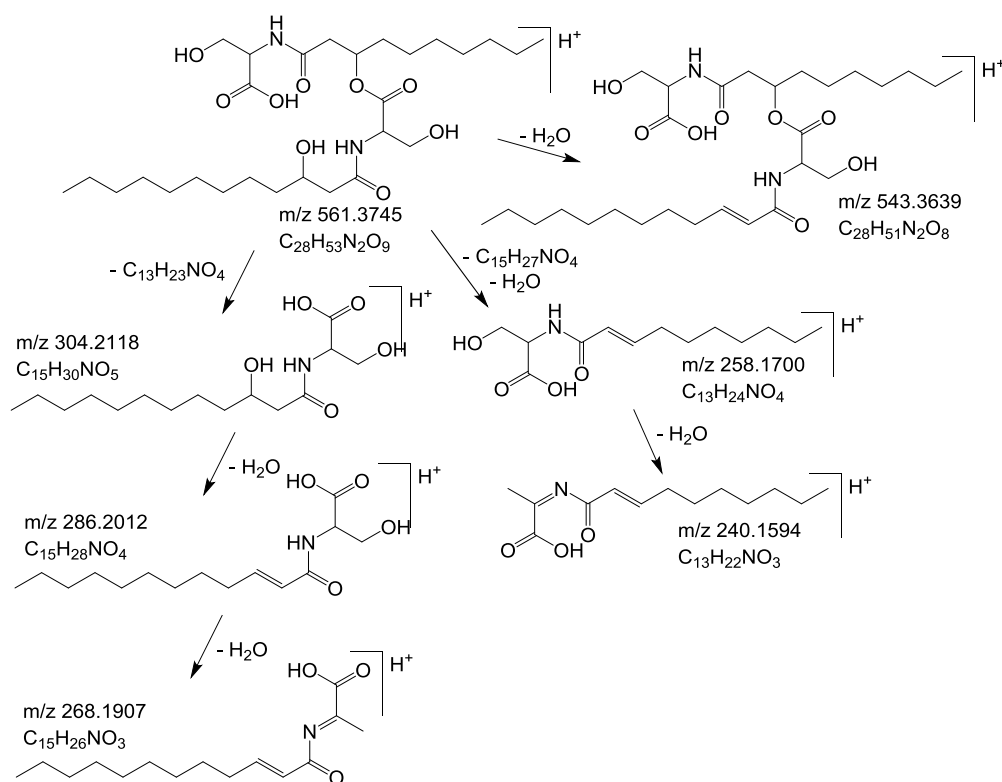

**Fig. S58.** HRMS<sup>2</sup> of ring-opened serratamolide C<sub>10</sub>+C<sub>12:1</sub> (compound **23** [M+H]<sup>+</sup>: *m/z* 559, C<sub>28</sub>H<sub>51</sub>N<sub>2</sub>O<sub>9</sub>).

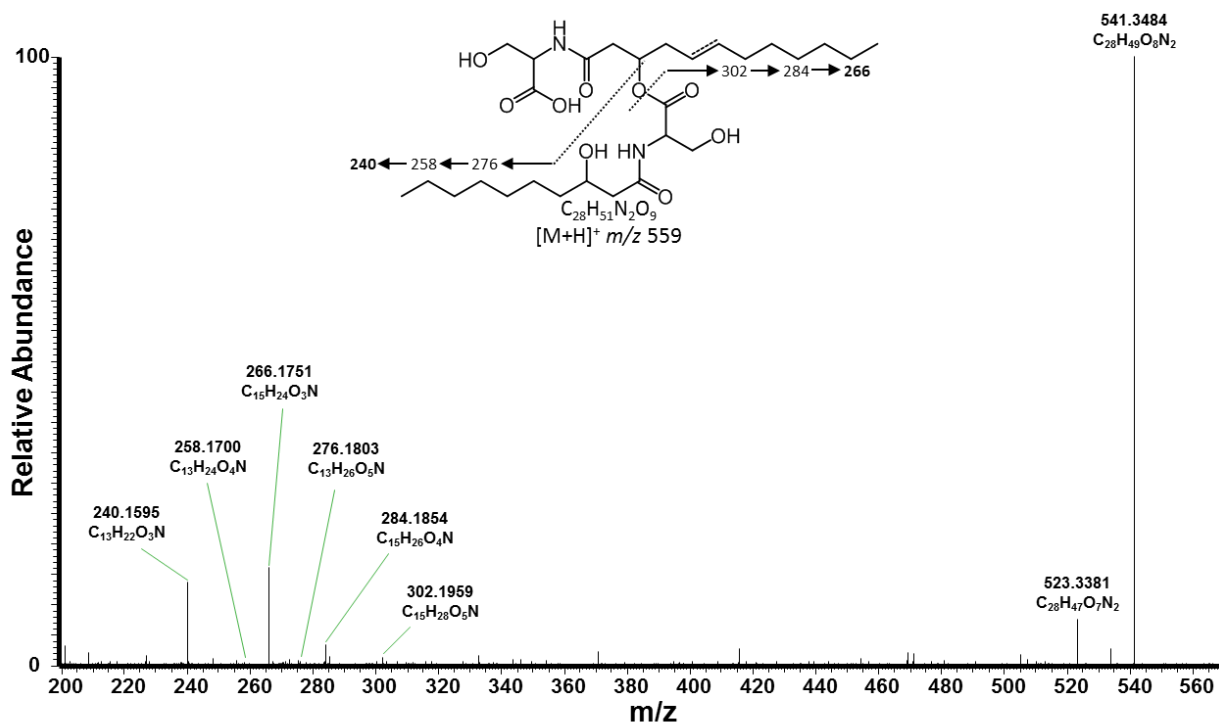

**Fig. S59.** Proposed mass spectral fragmentation pathway of ring-opened serratamolide C<sub>10</sub>+C<sub>12:1</sub> (compound **23** [M+H]<sup>+</sup>: *m/z* 559, C<sub>28</sub>H<sub>51</sub>N<sub>2</sub>O<sub>9</sub>).

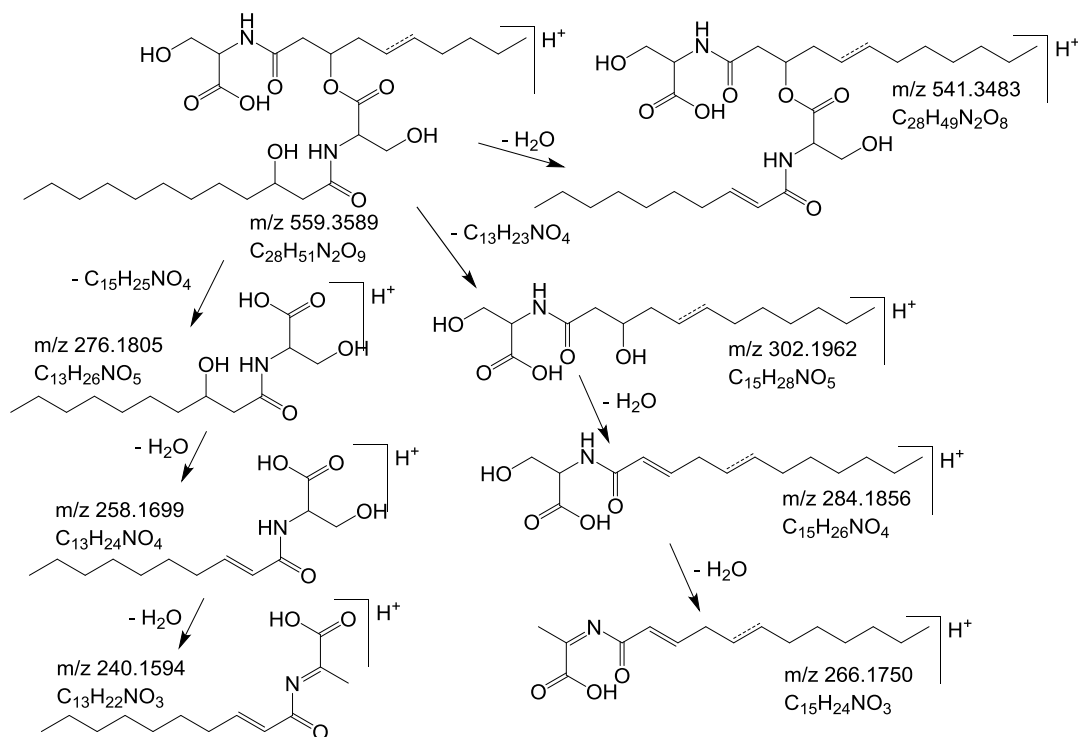

**Fig. S60.** HRMS<sup>2</sup> of ring-opened serratamolide C<sub>9</sub>+C<sub>10</sub> (compound **24** [M+H]<sup>+</sup>: *m/z* 519, C<sub>25</sub>H<sub>47</sub>N<sub>2</sub>O<sub>9</sub>).

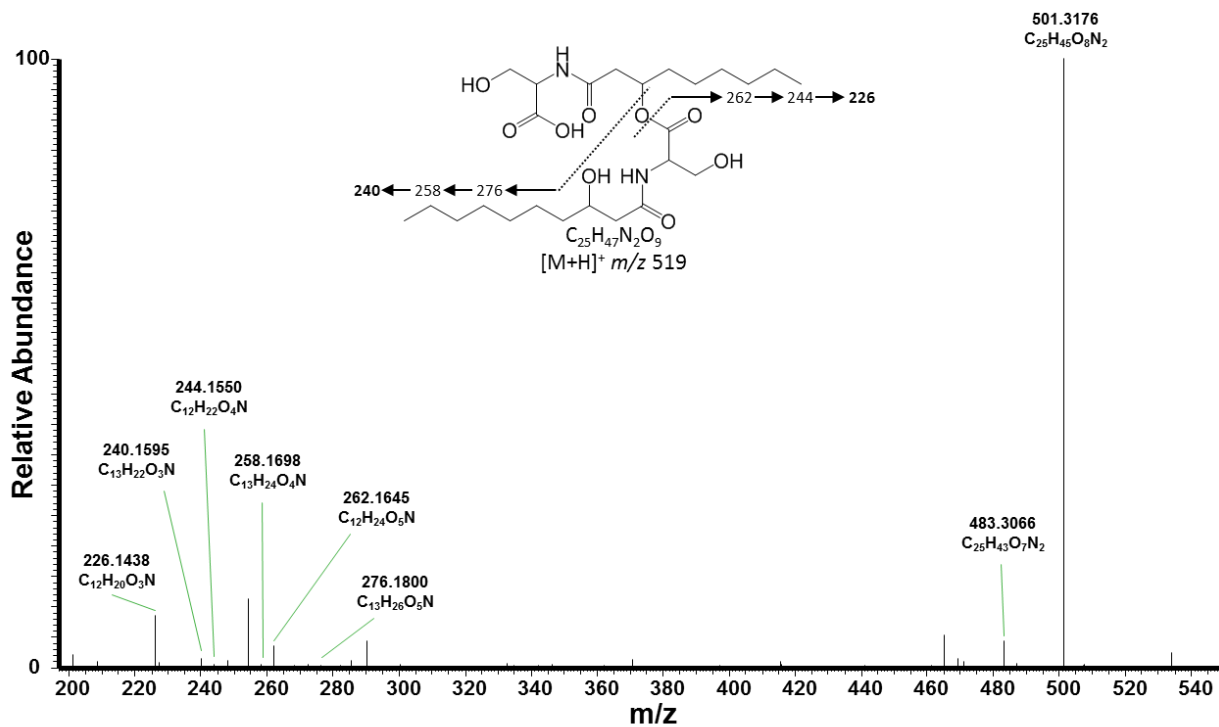

**Fig. S61.** Proposed mass spectral fragmentation pathway of ring-opened serratamolide C<sub>9</sub>+C<sub>10</sub> (compound **24** [M+H]<sup>+</sup>: *m/z* 519, C<sub>25</sub>H<sub>47</sub>N<sub>2</sub>O<sub>9</sub>).

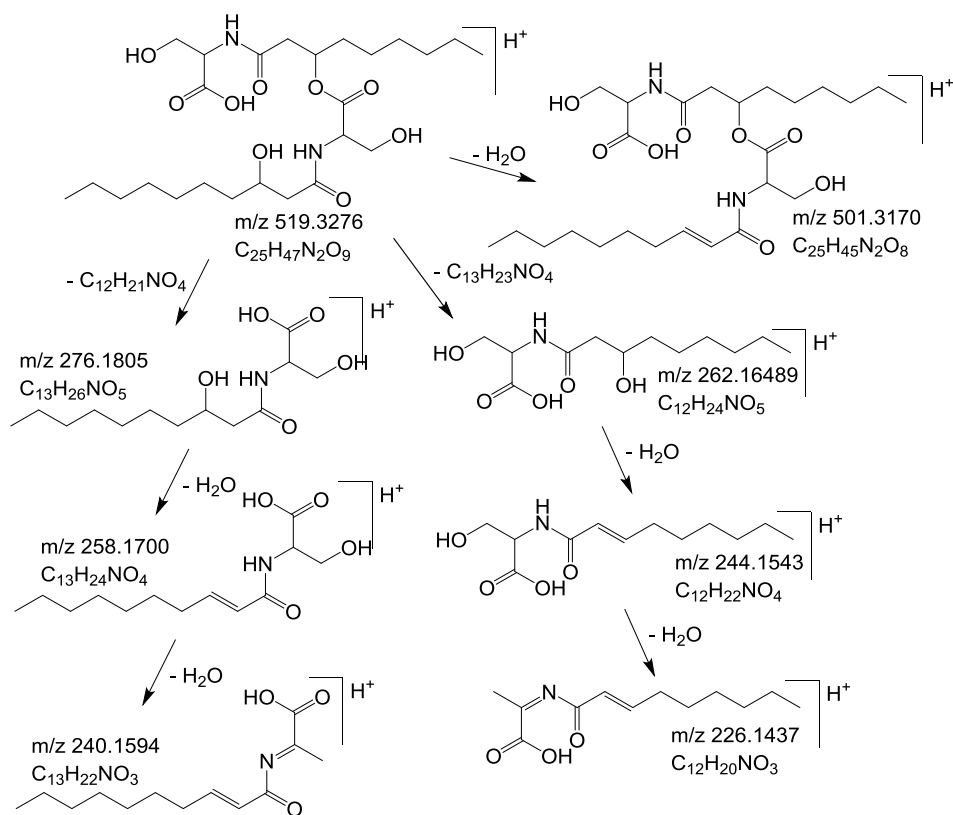



**Fig. S62.** HRMS<sup>2</sup> of ring-opened serratamolide C<sub>10</sub>+C<sub>13</sub> (compound **25** [M+H]<sup>+</sup>: *m/z* 575, C<sub>29</sub>H<sub>55</sub>N<sub>2</sub>O<sub>9</sub>).

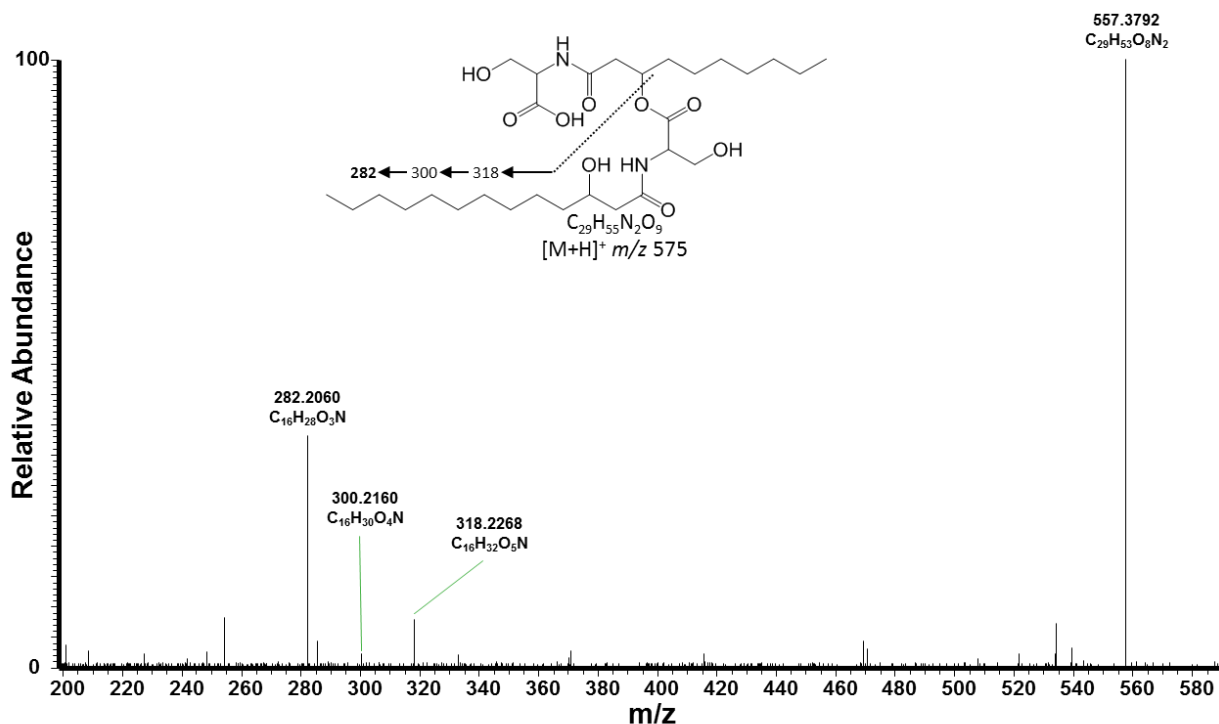

**Fig. S63.** Proposed mass spectral fragmentation pathway of ring-opened serratamolide C<sub>10</sub>+C<sub>13</sub> (compound **25** [M+H]<sup>+</sup>: *m/z* 575, C<sub>29</sub>H<sub>55</sub>N<sub>2</sub>O<sub>9</sub>).

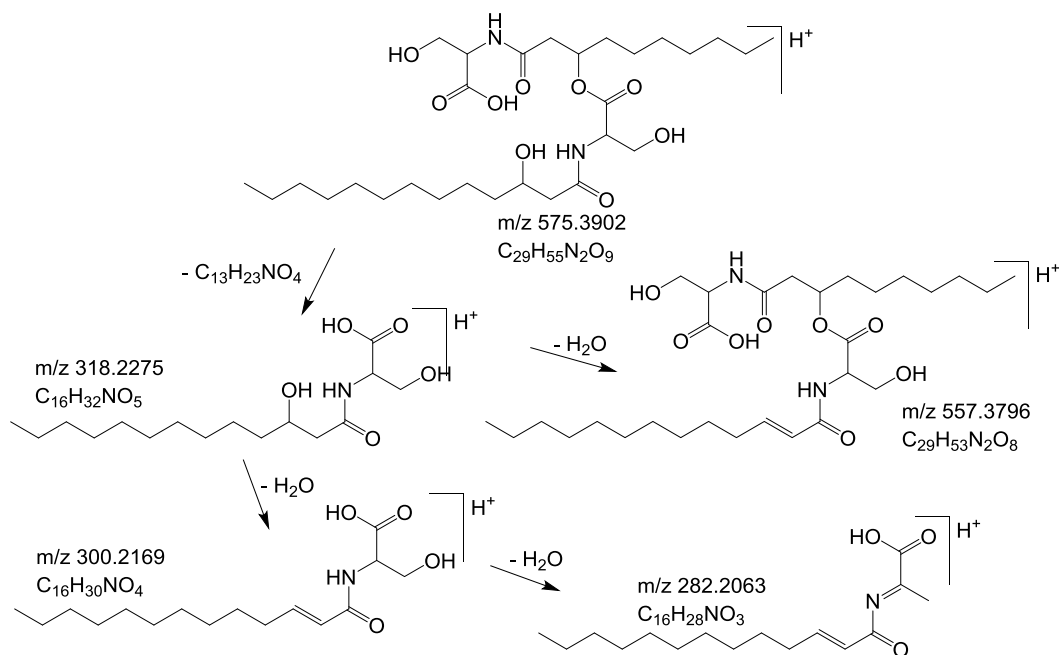

**Fig. S64.** HRMS<sup>2</sup> of ring-opened serratamolide C<sub>12</sub>+C<sub>12</sub> (compound **26** [M+H]<sup>+</sup>: *m/z* 589, C<sub>30</sub>H<sub>57</sub>N<sub>2</sub>O<sub>9</sub>).

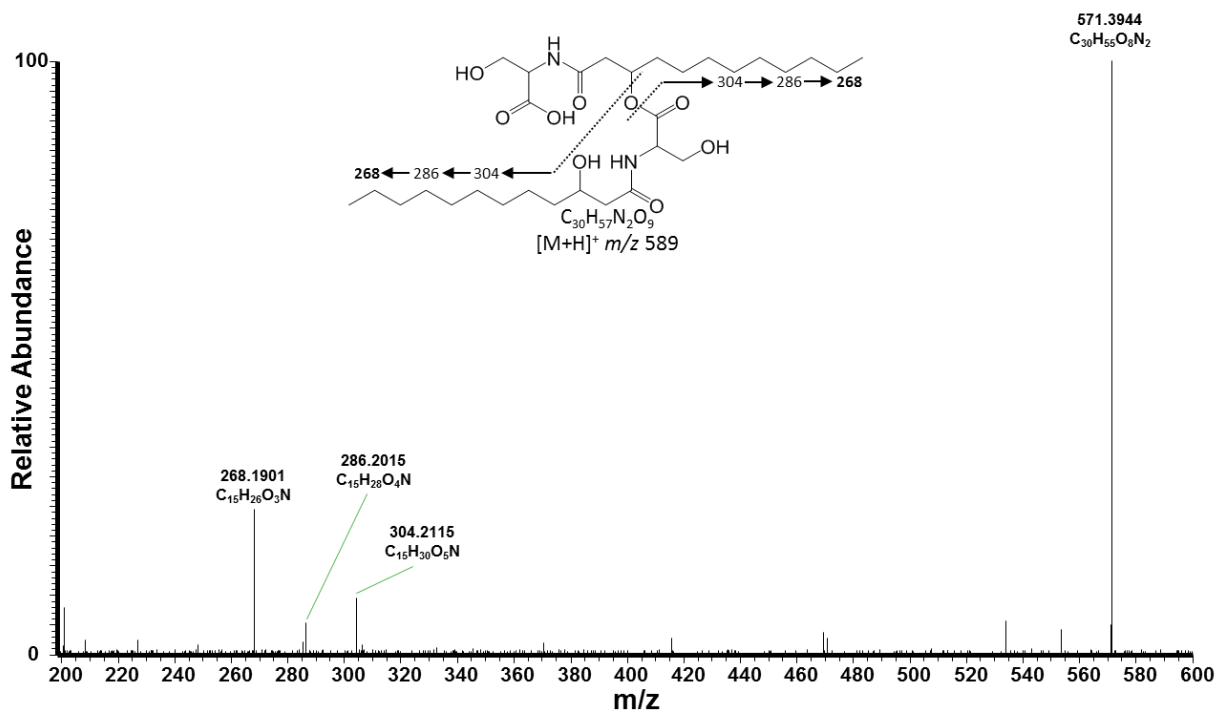

**Fig. S65.** Proposed mass spectral fragmentation pathway of ring-opened serratamolide C<sub>12</sub>+C<sub>12</sub> (compound **26** [M+H]<sup>+</sup>: *m/z* 589, C<sub>30</sub>H<sub>57</sub>N<sub>2</sub>O<sub>9</sub>).

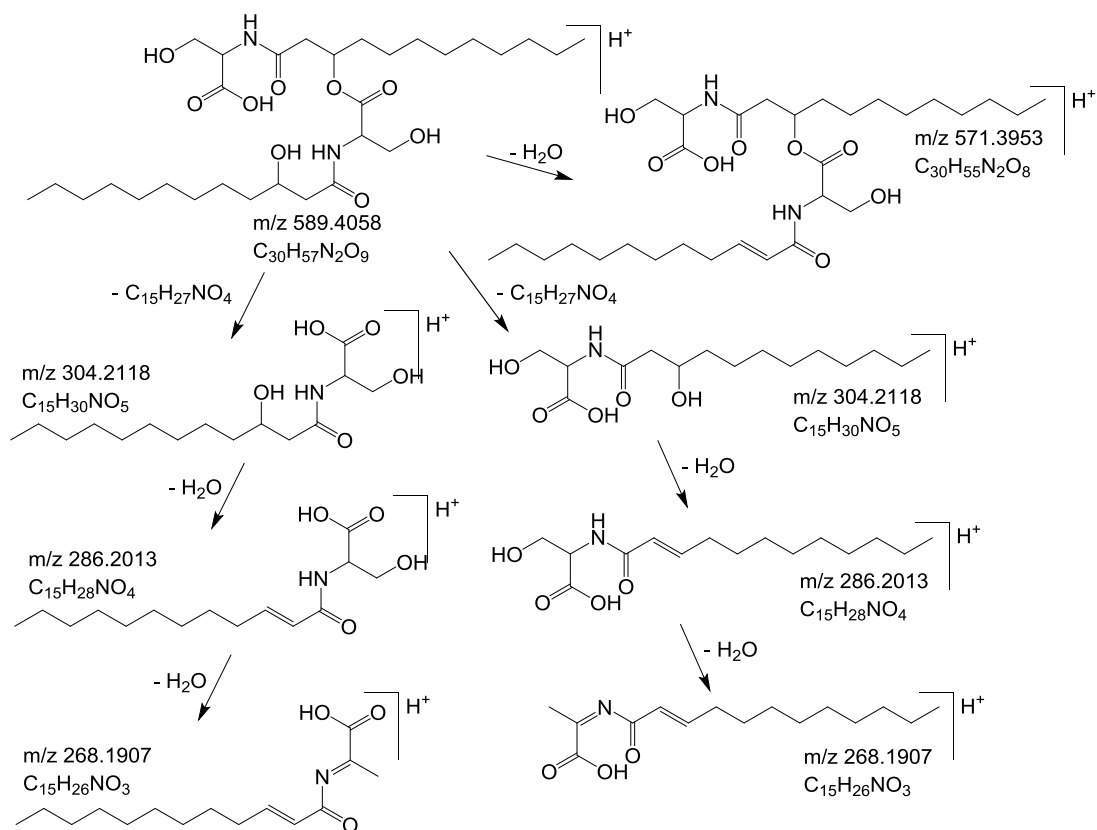

**Fig. S66.** HRMS<sup>2</sup> of ring-opened serratamolide C<sub>12</sub>+C<sub>13</sub> (compound **27** [M+H]<sup>+</sup>: *m/z* 603, C<sub>31</sub>H<sub>59</sub>N<sub>2</sub>O<sub>9</sub>).

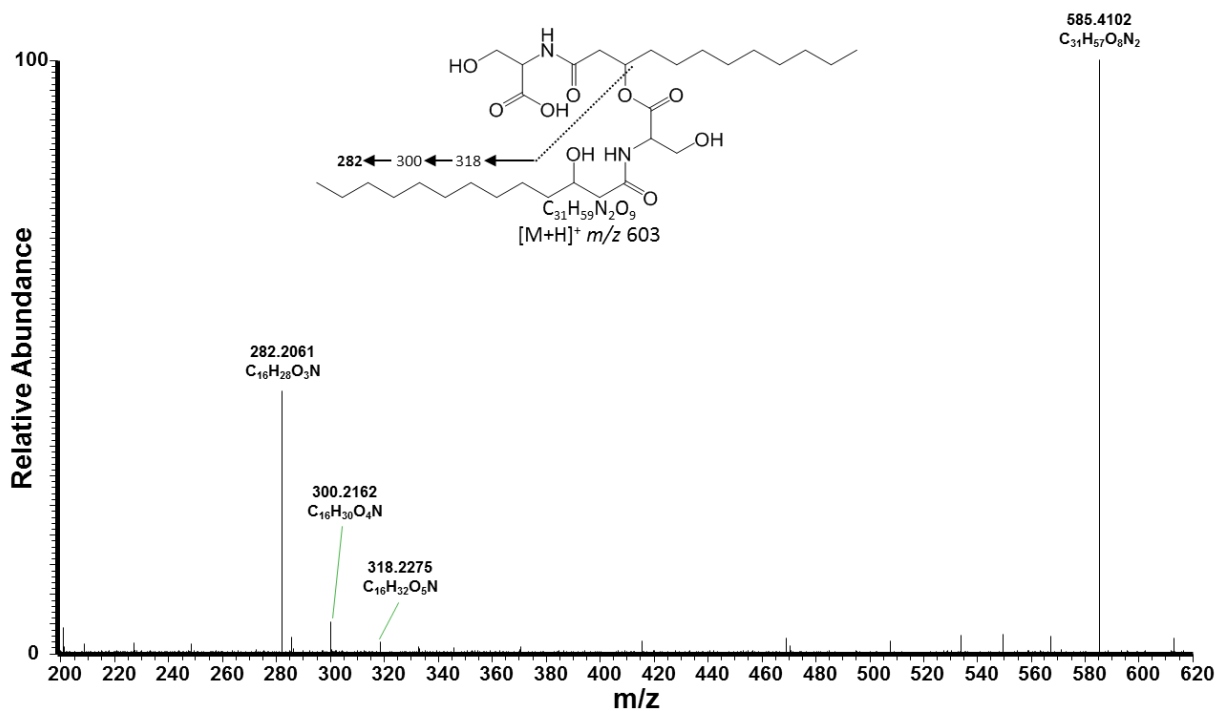

**Fig. S67.** Proposed mass spectral fragmentation pathway of ring-opened serratamolide C<sub>12</sub>+C<sub>13</sub> (compound **27** [M+H]<sup>+</sup>: *m/z* 603, C<sub>31</sub>H<sub>59</sub>N<sub>2</sub>O<sub>9</sub>).

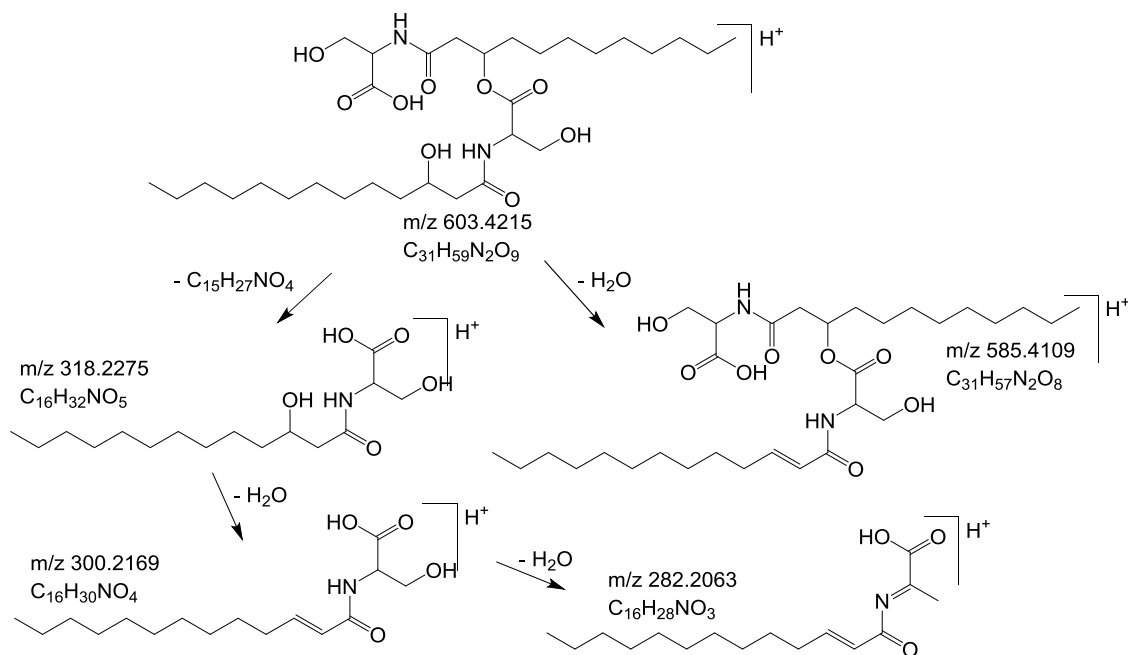

**Fig. S68.** HRMS<sup>2</sup> of ring-opened serratamolide C<sub>10</sub>+C<sub>13:1</sub> (compound **28** [M+H]<sup>+</sup>: *m/z* 573, C<sub>29</sub>H<sub>53</sub>N<sub>2</sub>O<sub>9</sub>).

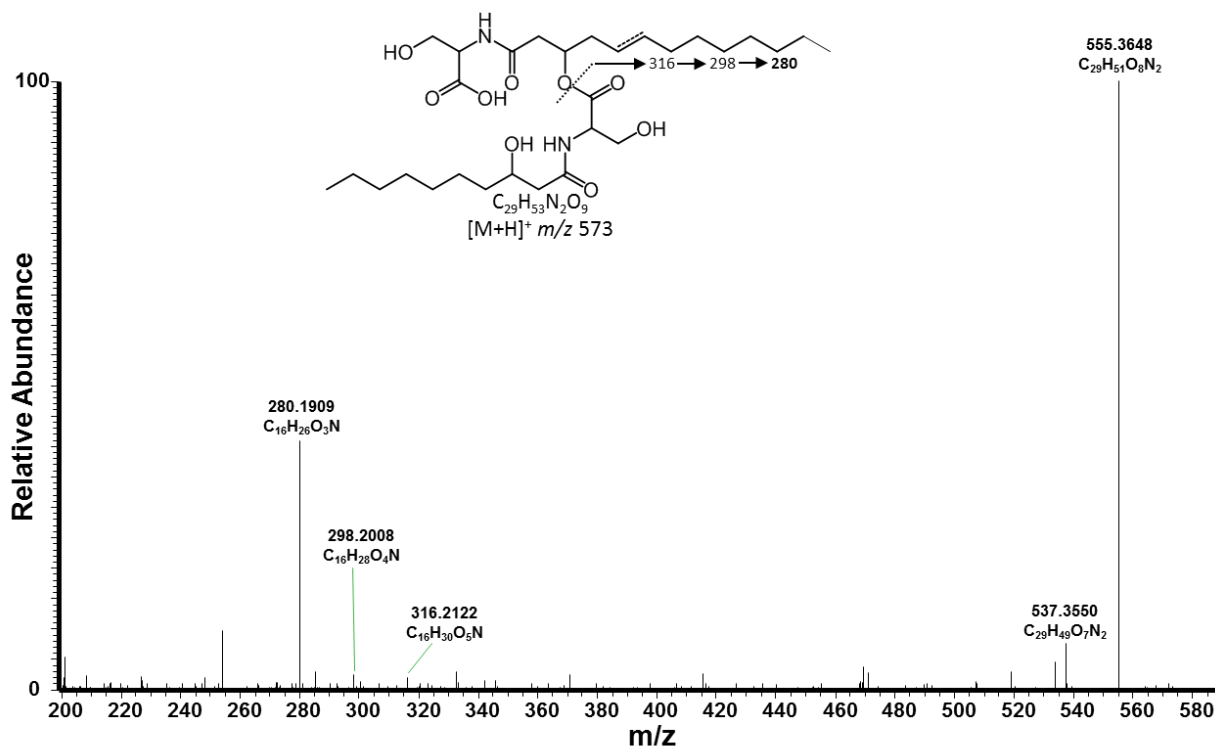

**Fig. S69.** HRMS<sup>2</sup> of ring-opened serratamolide C<sub>12</sub>+C<sub>12:1</sub> (compound **29** [M+H]<sup>+</sup>: *m/z* 587, C<sub>30</sub>H<sub>55</sub>N<sub>2</sub>O<sub>9</sub>).

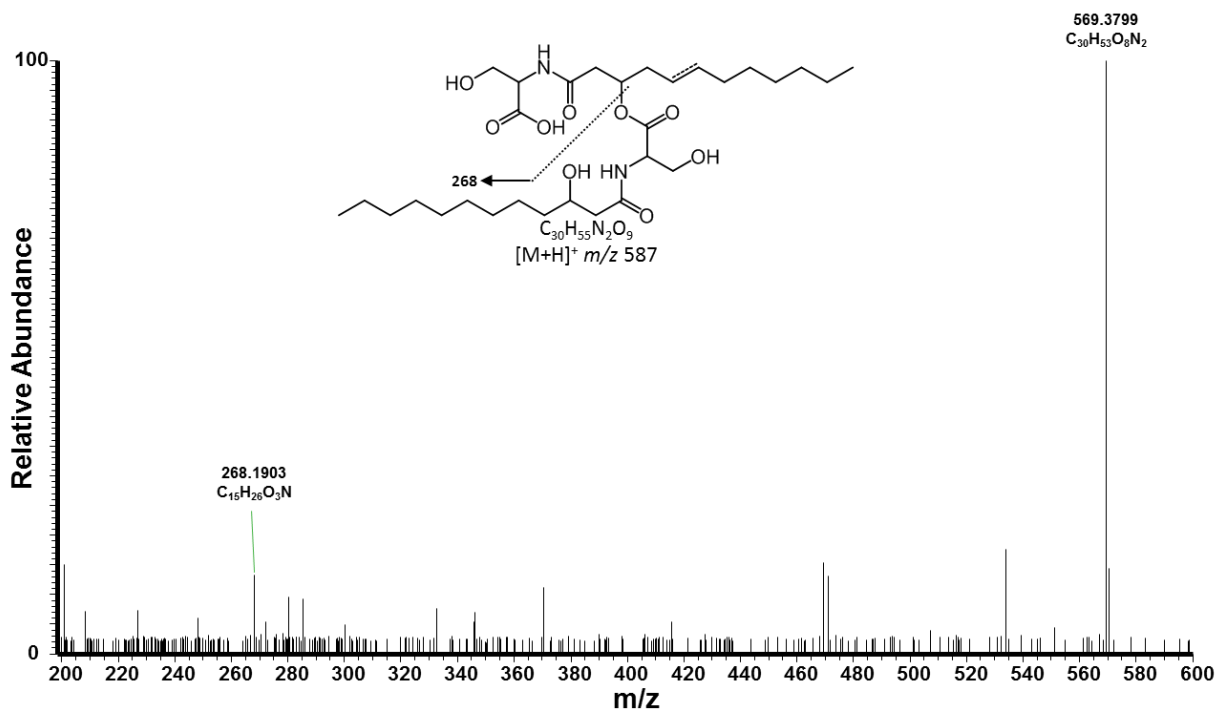

**Fig. S70.** HRMS<sup>2</sup> of ring-opened serratamolide C<sub>13</sub>+C<sub>12:1</sub> (compound **30** [M+H]<sup>+</sup>: *m/z* 601, C<sub>31</sub>H<sub>57</sub>N<sub>2</sub>O<sub>9</sub>).

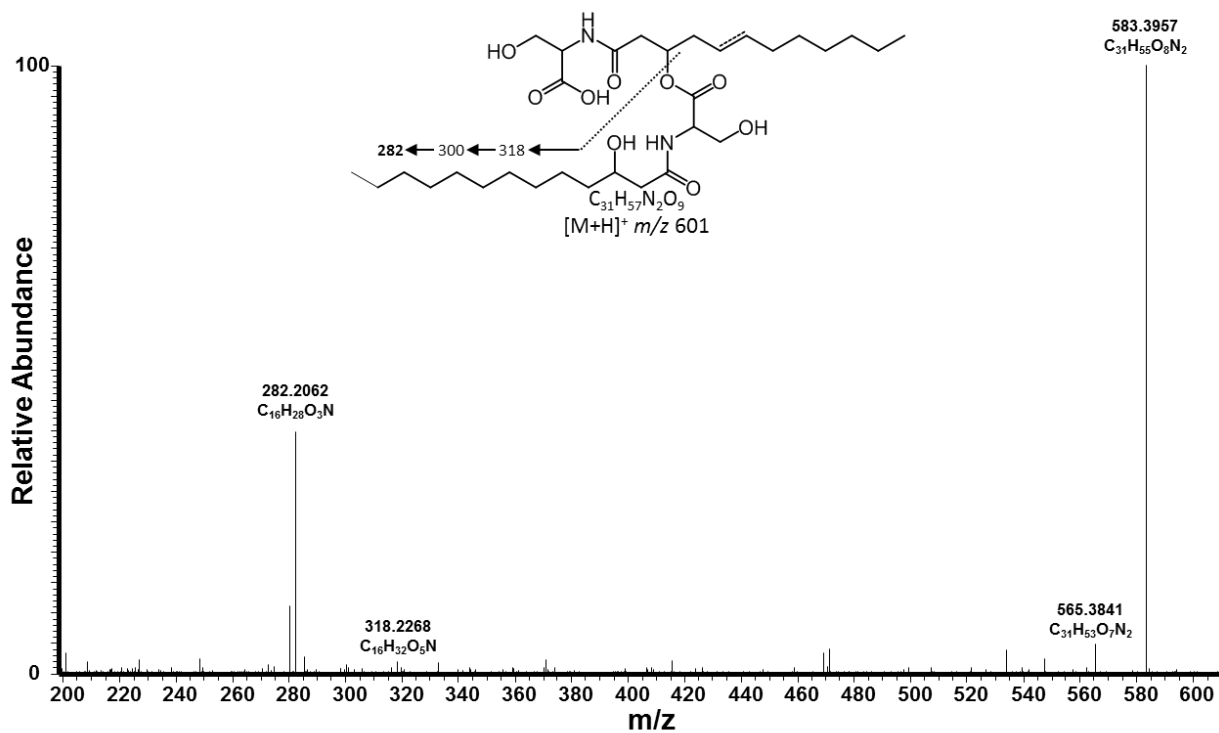

**Fig. S71.** HRMS<sup>2</sup> of serratamic acid (N-(D-3-hydroxydecanoyl)-L-serine, compound **31** [M+H]<sup>+</sup>: *m/z* 276, C<sub>13</sub>H<sub>26</sub>NO<sub>5</sub>).

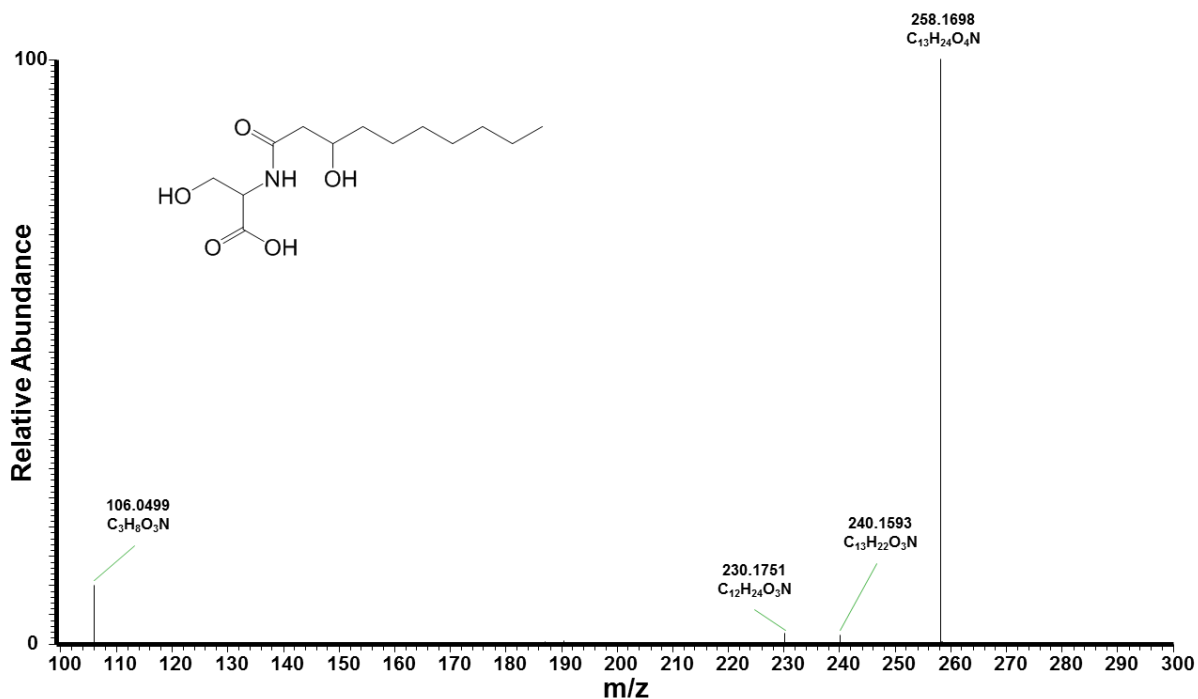

**Fig. S72.** HRMS<sup>3</sup> of serratamic acid (N-(D-3-hydroxydecanoyl)-L-serine, compound **31** [M+H]<sup>+</sup>: *m/z* 276 via 258).

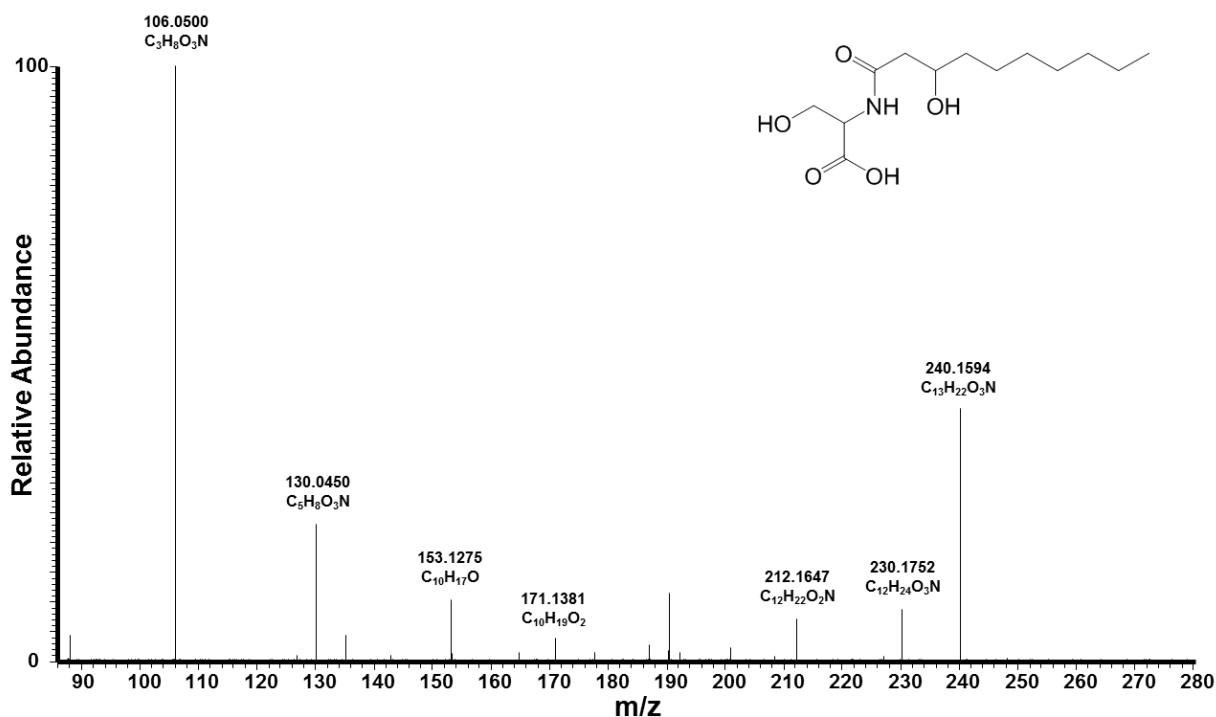

**Fig. S73.** Proposed mass spectral fragmentation pathway of serratamic acid (N-(D-3-hydroxydecanoyl)-L-serine, compound **31** [M+H]<sup>+</sup>: *m/z* 276, C<sub>13</sub>H<sub>26</sub>NO<sub>5</sub>).

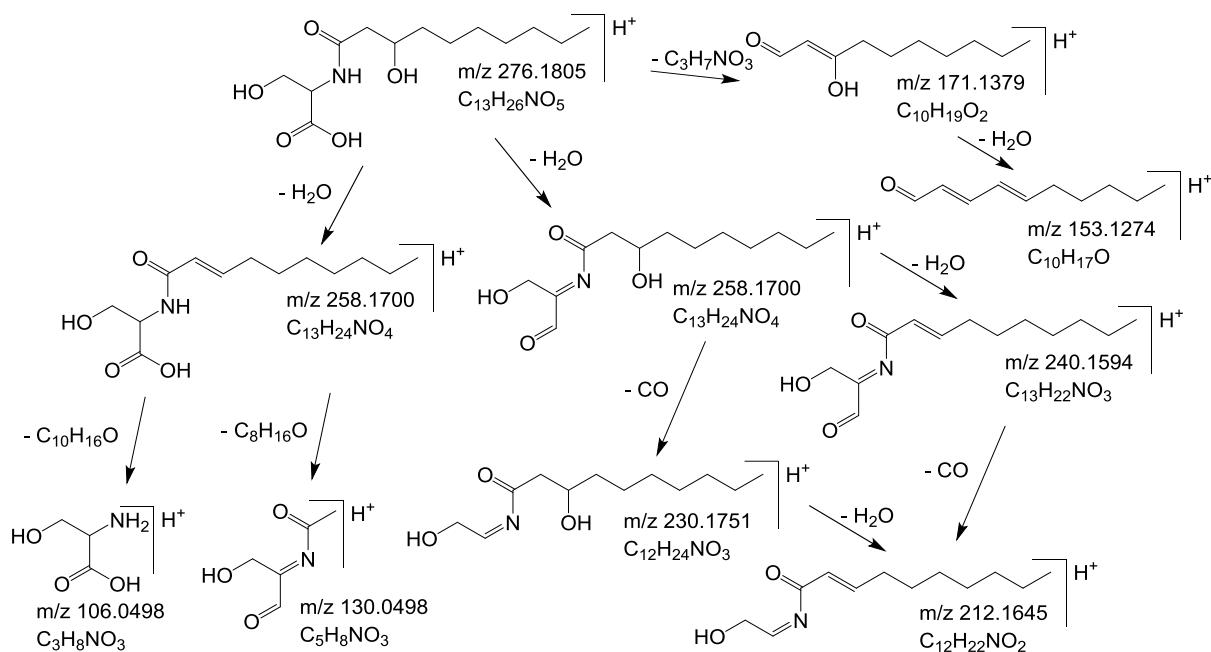

**Fig. S74.** HRMS<sup>2</sup> of serratamic acid derivative (hydroxydodecanoyl-serine, compound **32** [M+H]<sup>+</sup>: *m/z* 304, C<sub>15</sub>H<sub>30</sub>NO<sub>5</sub>).

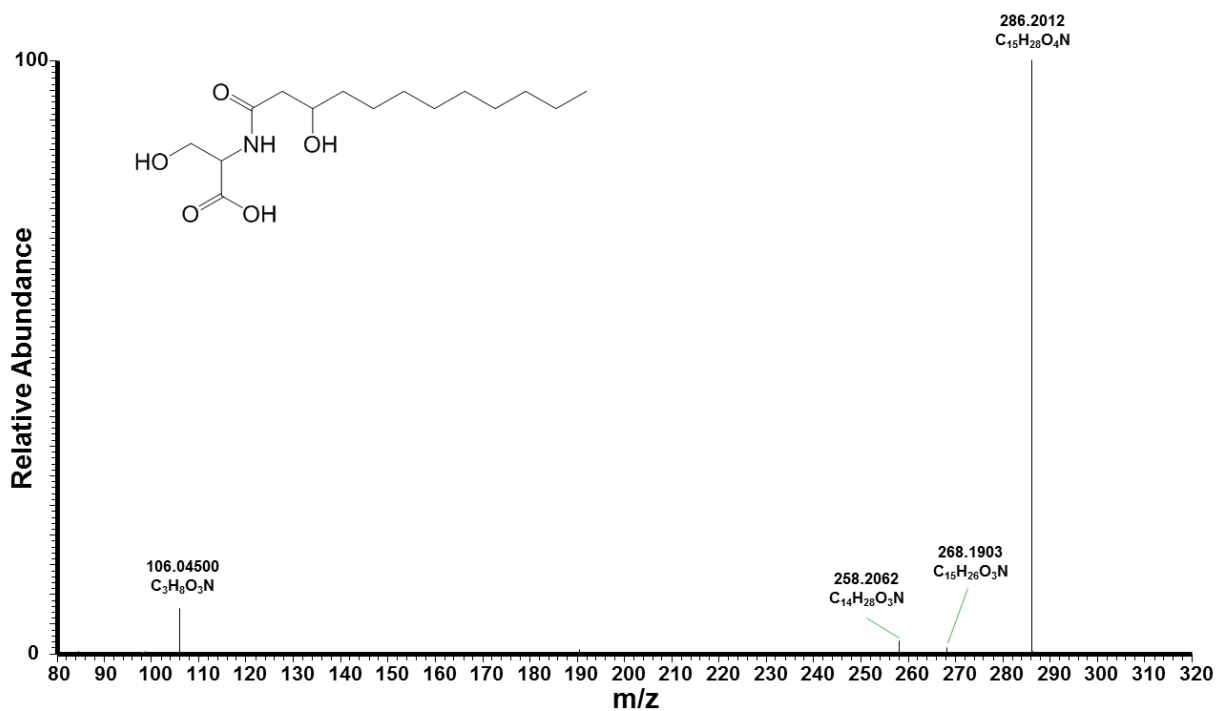

**Fig. S75.** HRMS<sup>3</sup> of serratamic acid derivative (hydroxydodecanoyl-serine, compound **32** [M+H]<sup>+</sup>: *m/z* 304 via 286).

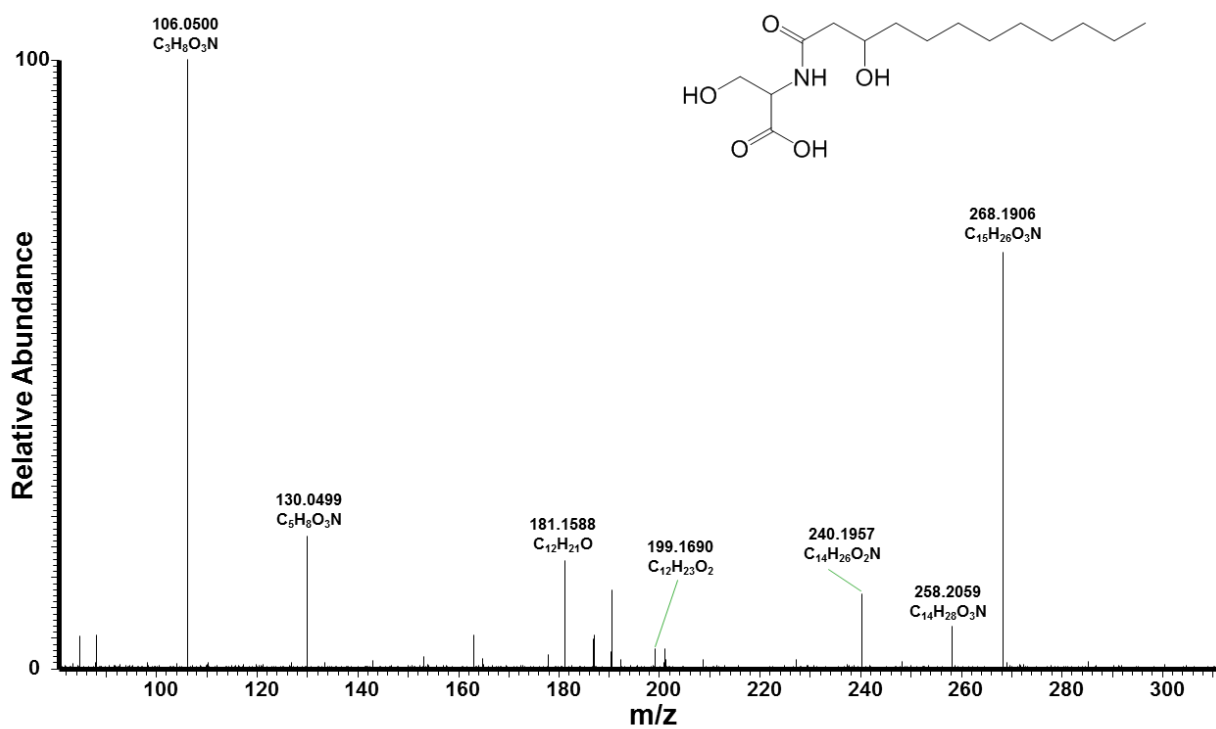



**Fig. S76.** Proposed mass spectral fragmentation pathway of serratamic acid derivative (hydroxydodecanoyl-serine, compound **32**  $[M+H]^+$ :  $m/z$  304,  $C_{15}H_{30}NO_5$ ).

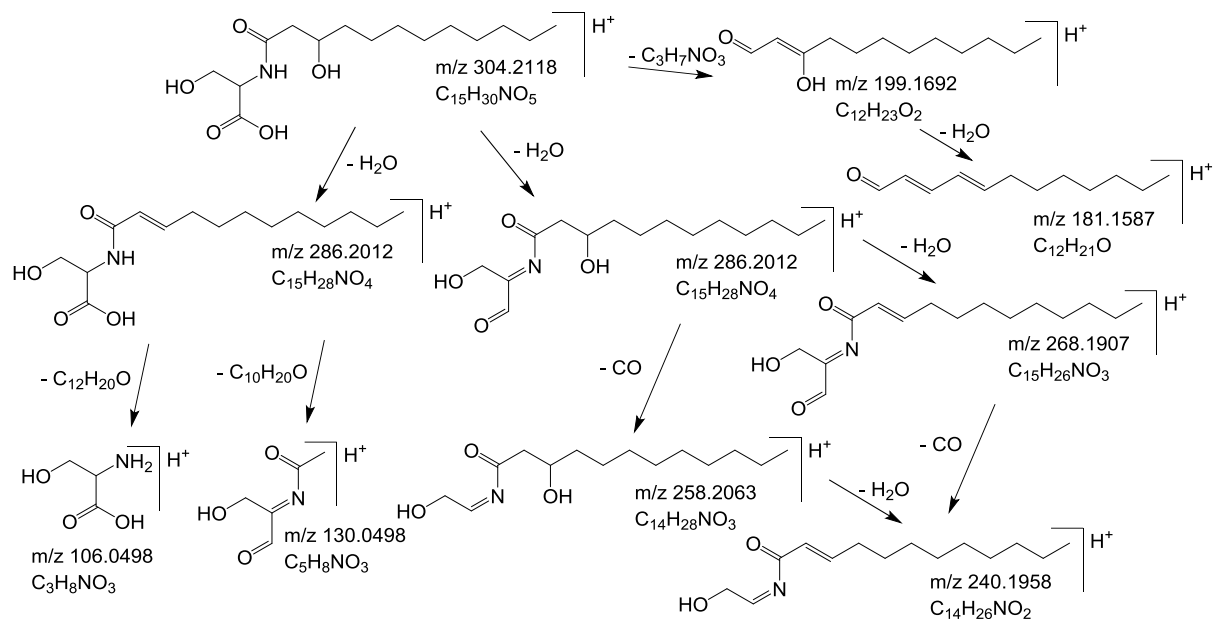

**Fig. S77.** HRMS<sup>2</sup> of serratamic acid derivative with double bond (hydroxydodecenoyl-serine, compound **33** [M+H]<sup>+</sup>:  $m/z$  302, C<sub>15</sub>H<sub>28</sub>NO<sub>5</sub>).

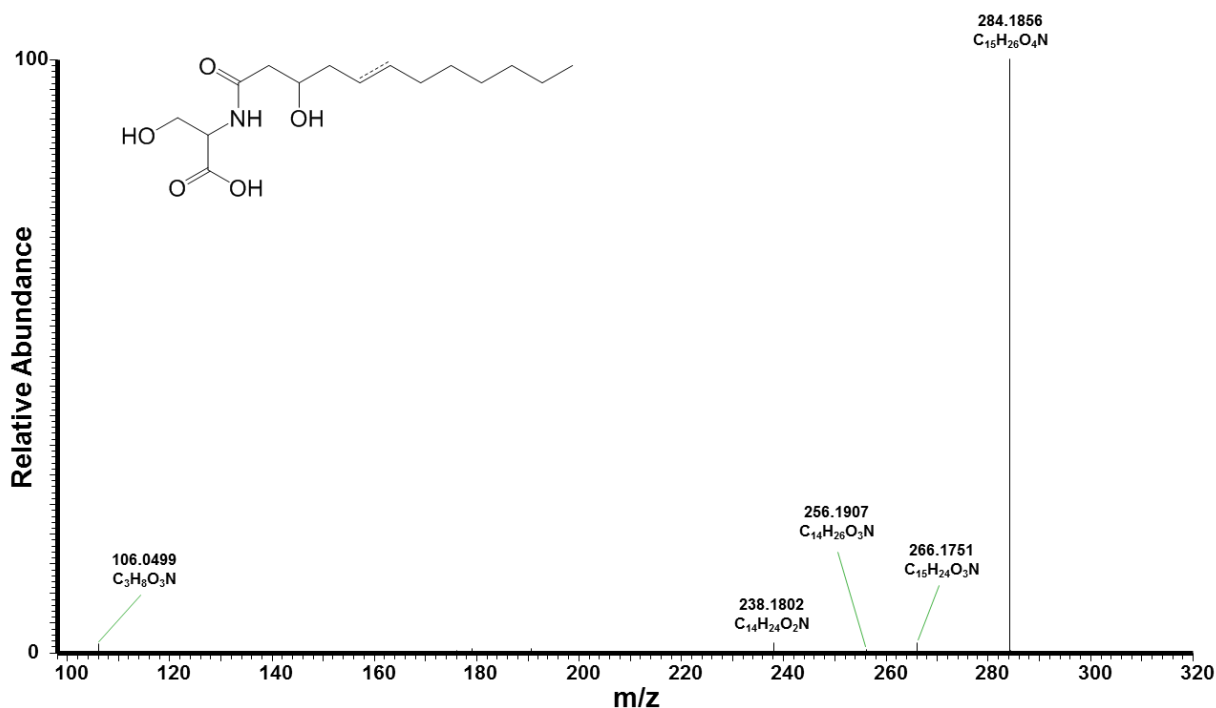

**Fig. S78.** HRMS<sup>3</sup> of serratamic acid derivative with double bond (hydroxydodecenoyl-serine, compound **33** [M+H]<sup>+</sup>:  $m/z$  302 via 284).

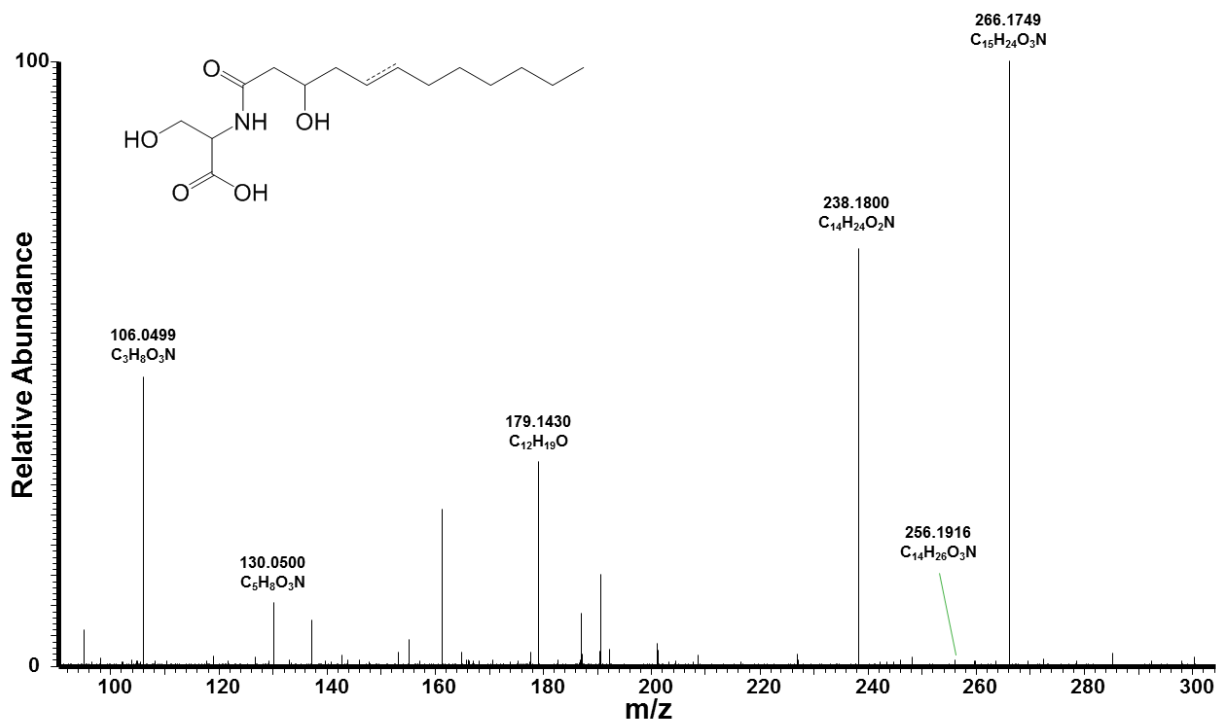

**Fig. S79.** Proposed mass spectral fragmentation pathway of serratamic acid derivative with double bond (hydroxydodecenyl-serine, compound **33**  $[M+H]^+$ :  $m/z$  302,  $C_{15}H_{28}NO_5$ ).

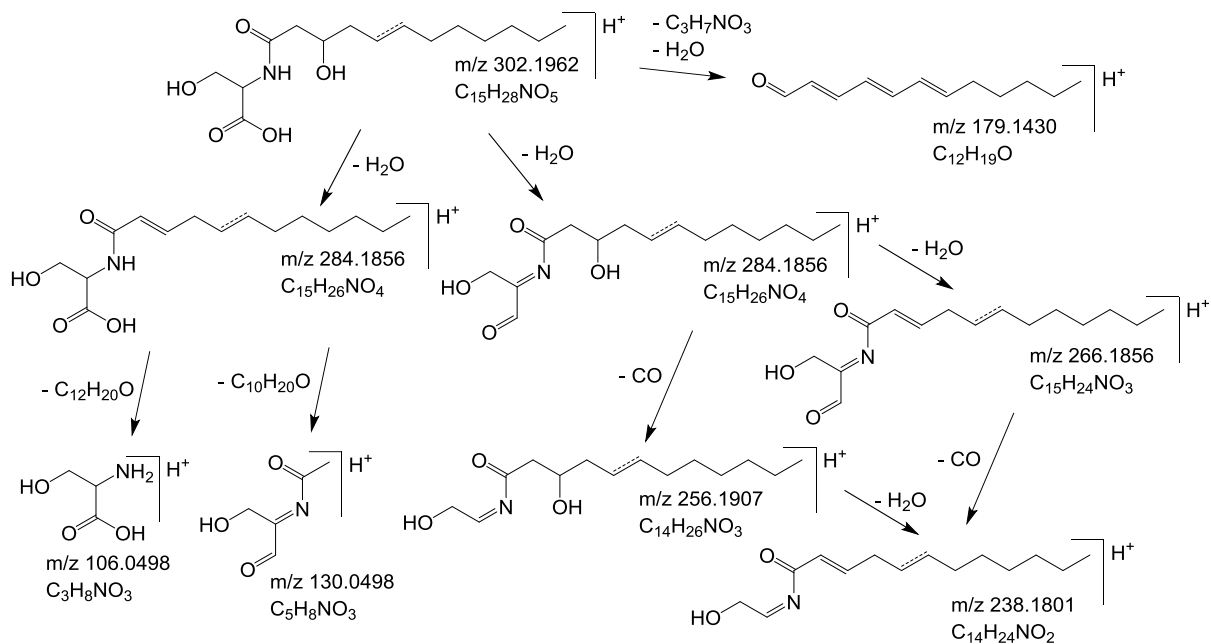

**Fig. S80.**  $^1\text{H-NMR}$  spectrum of serrawettin W1 / serratamolide  $\text{C}_{10}+\text{C}_{10}$  (compound **10**,  $\text{CDCl}_3$ , 600 MHz).

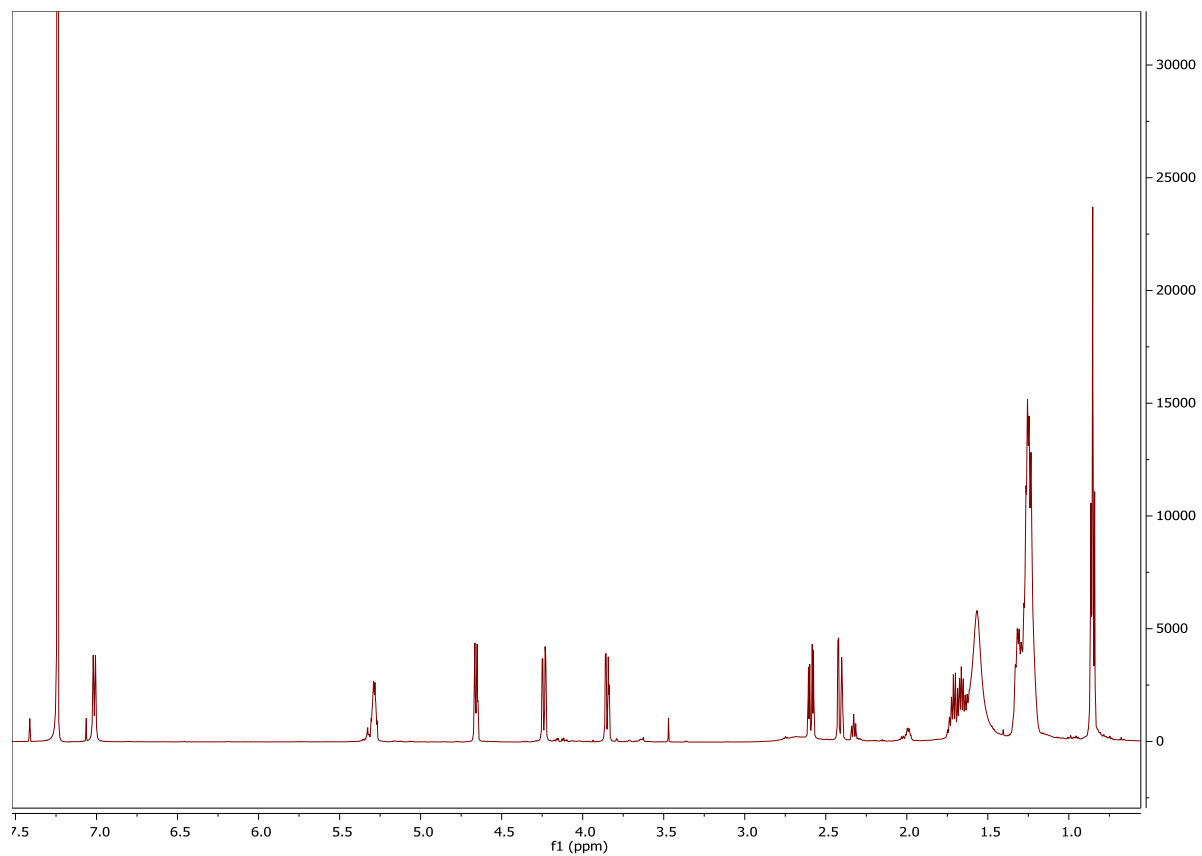

**Fig. S81.**  $^{13}\text{C}$ -NMR spectrum of serrawettin W1 / serratamolide  $\text{C}_{10}+\text{C}_{10}$  (compound **10**,  $\text{CDCl}_3$ , 150 MHz).

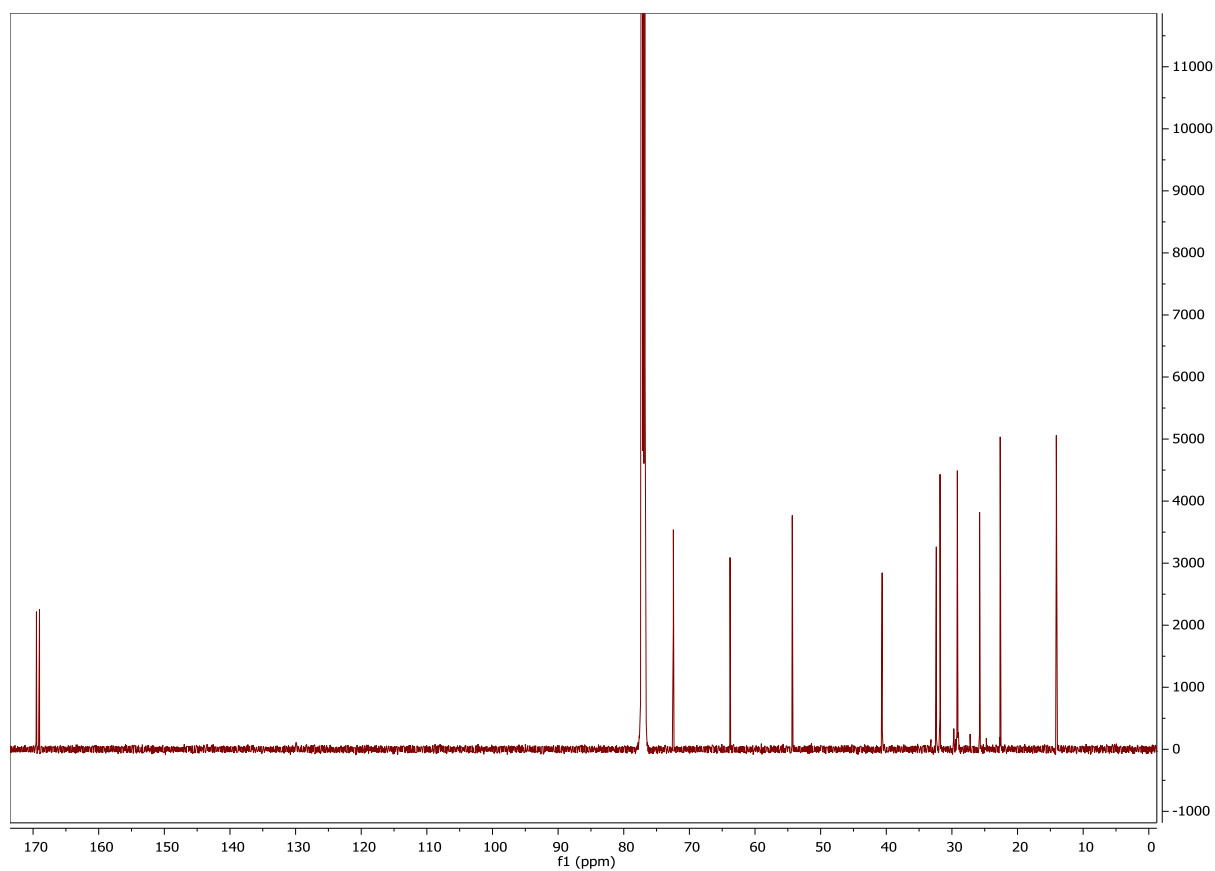

**Fig. S82.** COSY NMR spectrum of serrawettin W1 / serratamolide C<sub>10</sub>+C<sub>10</sub> (compound **10**, CDCl<sub>3</sub>).

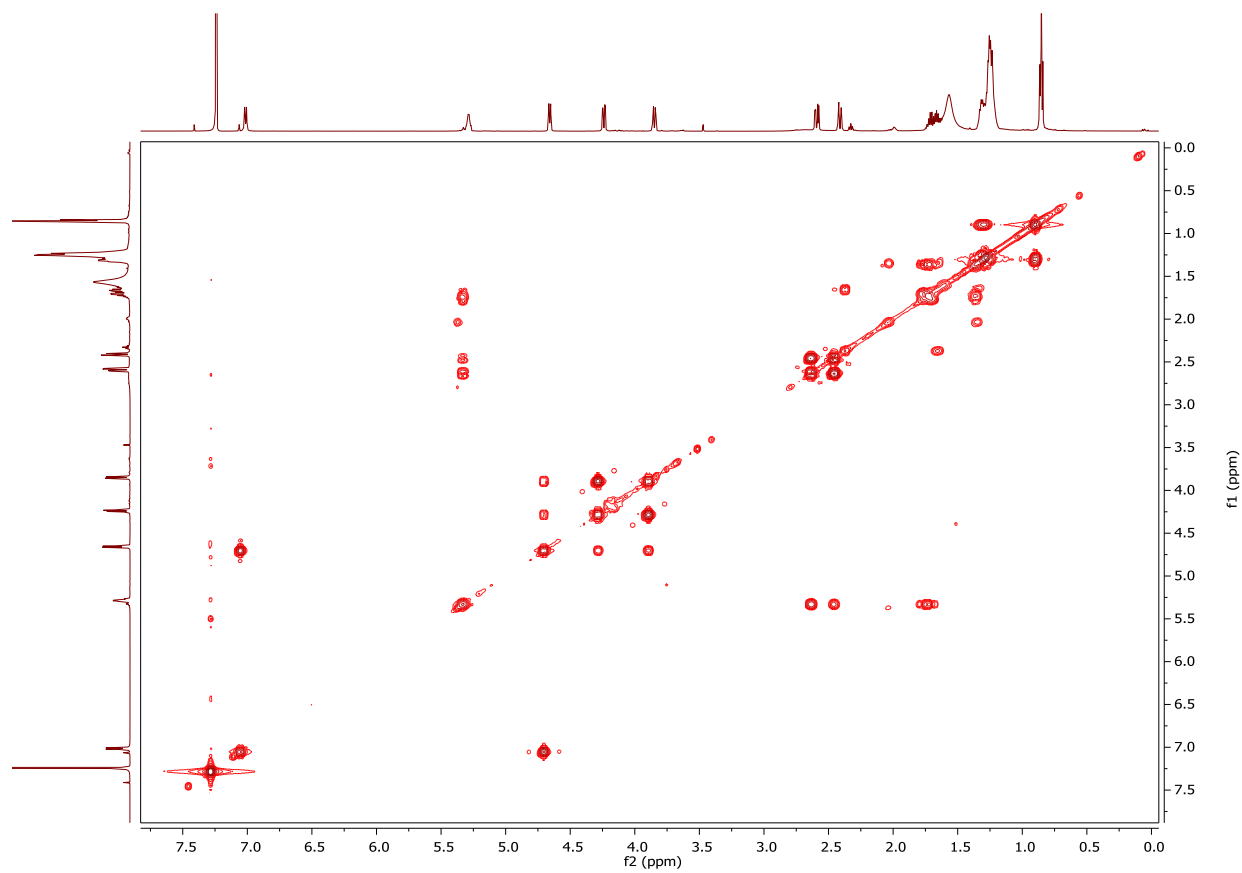

**Fig. S83.** HSQC NMR spectrum of serrawettin W1 / serratamolide C<sub>10</sub>+C<sub>10</sub> (compound **10**, CDCl<sub>3</sub>).

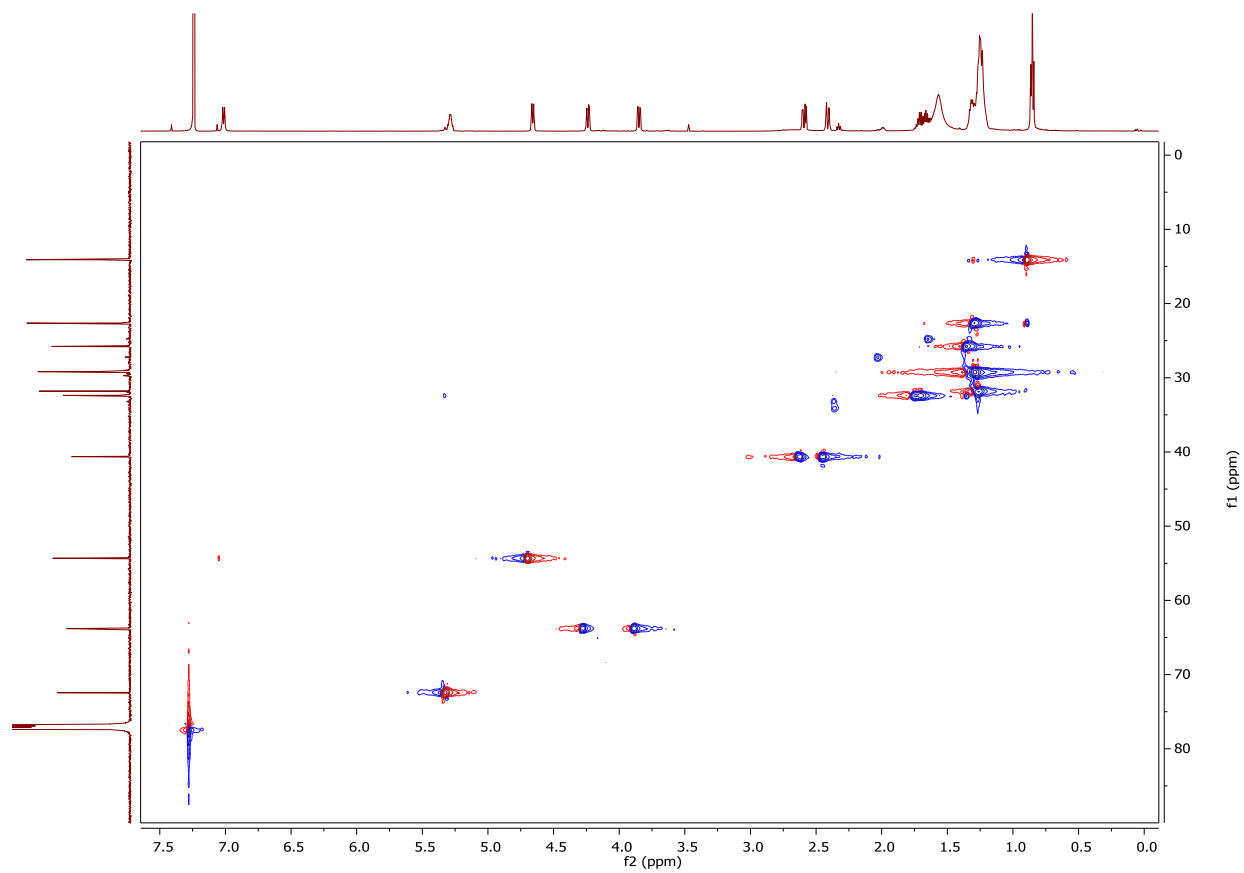

**Fig. S84.** HMBC NMR spectrum of serrawettin W1 / serratamolide C<sub>10</sub>+C<sub>10</sub> (compound **10**, CDCl<sub>3</sub>).

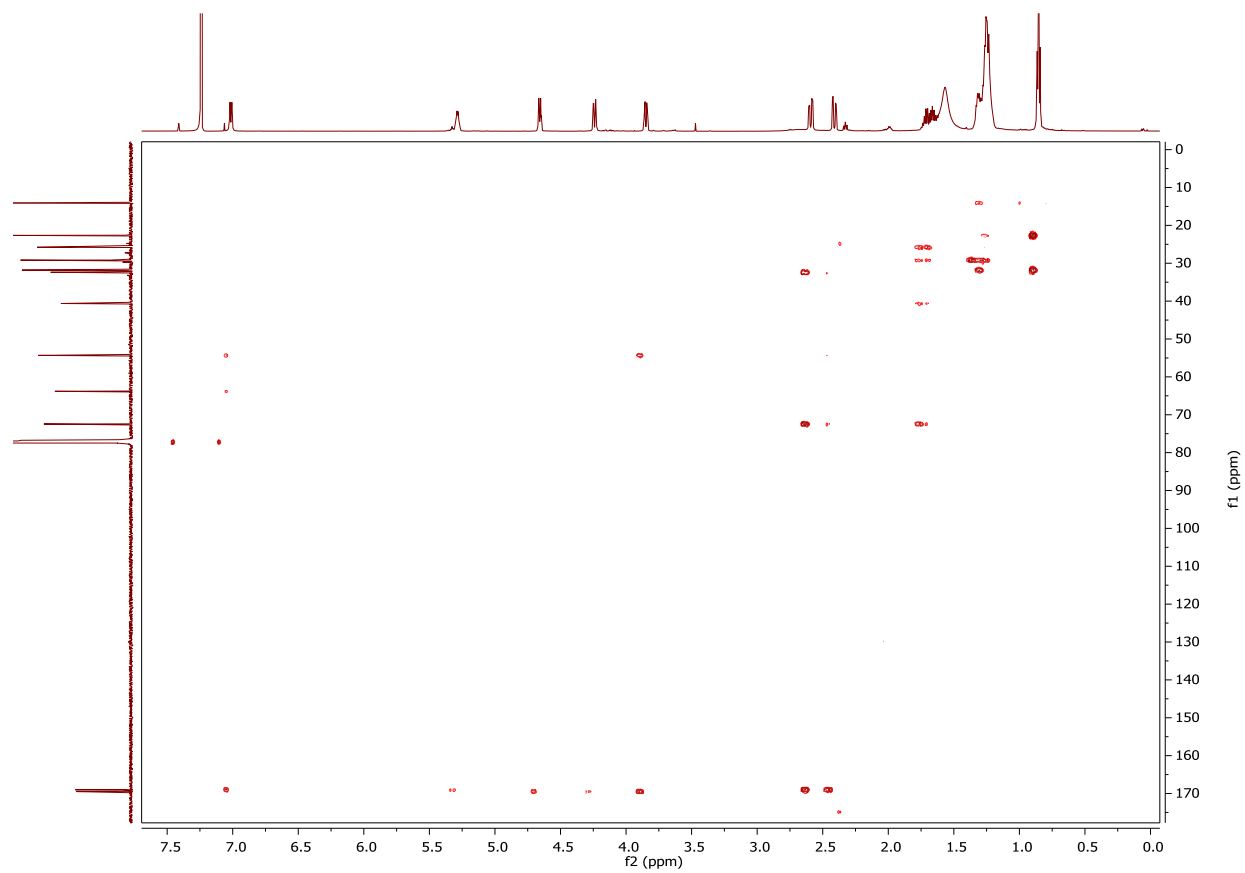



**Fig. S85.**  $^1\text{H-NMR}$  spectrum of serratamic acid (N-(D-3-hydroxydecanoyl)-L-serine, compound **31**, MeOD, 700 MHz).

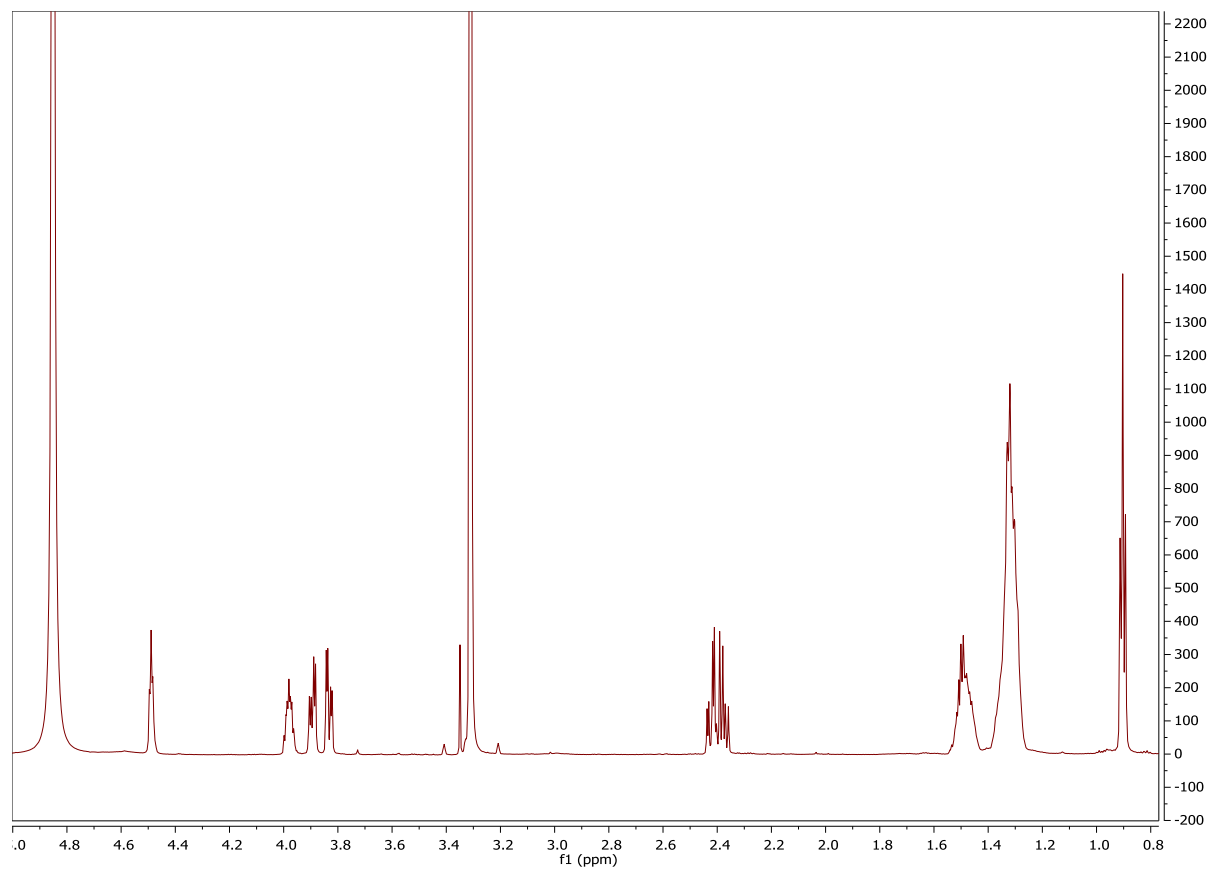

**Fig. S86.**  $^{13}\text{C}$ -NMR spectrum of serratamic acid (N-(D-3-hydroxydecanoyl)-L-serine, compound **31**, MeOD, 175 MHz).

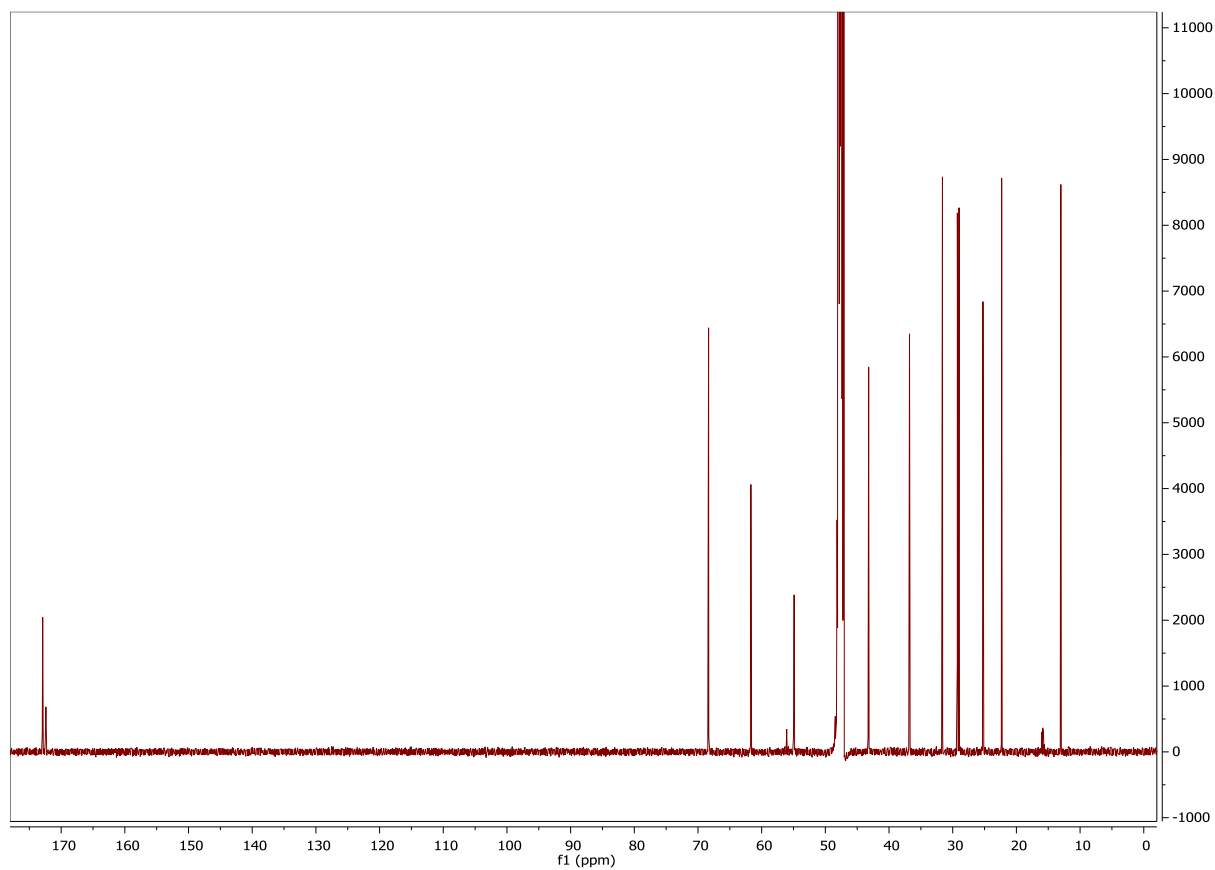

**Fig. S87.** COSY NMR spectrum of serratamic acid (N-(D-3-hydroxydecanoyl)-L-serine, compound **31**, MeOD).

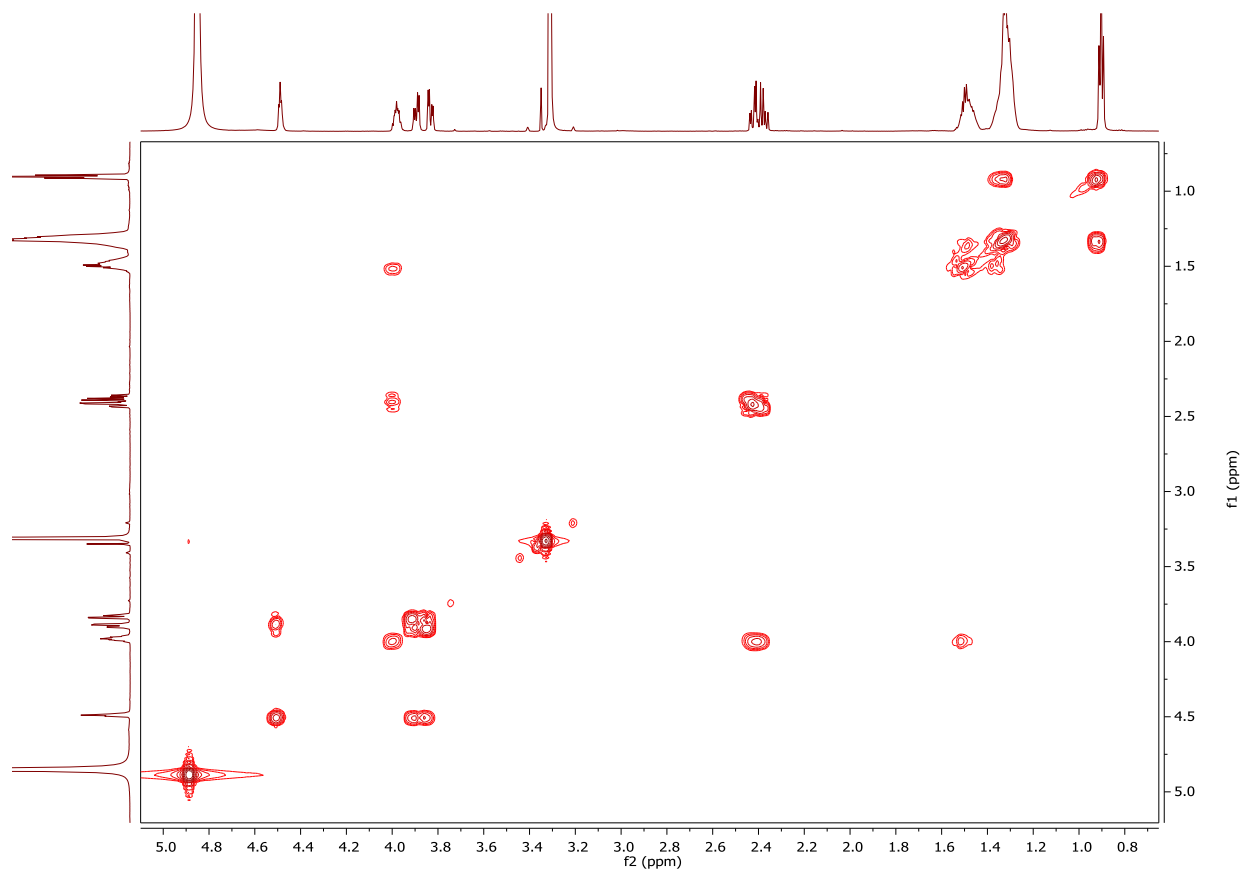

**Fig. S88.** HSQC NMR spectrum of serratamic acid (N-(D-3-hydroxydecanoyl)-L-serine, compound **31**, MeOD).

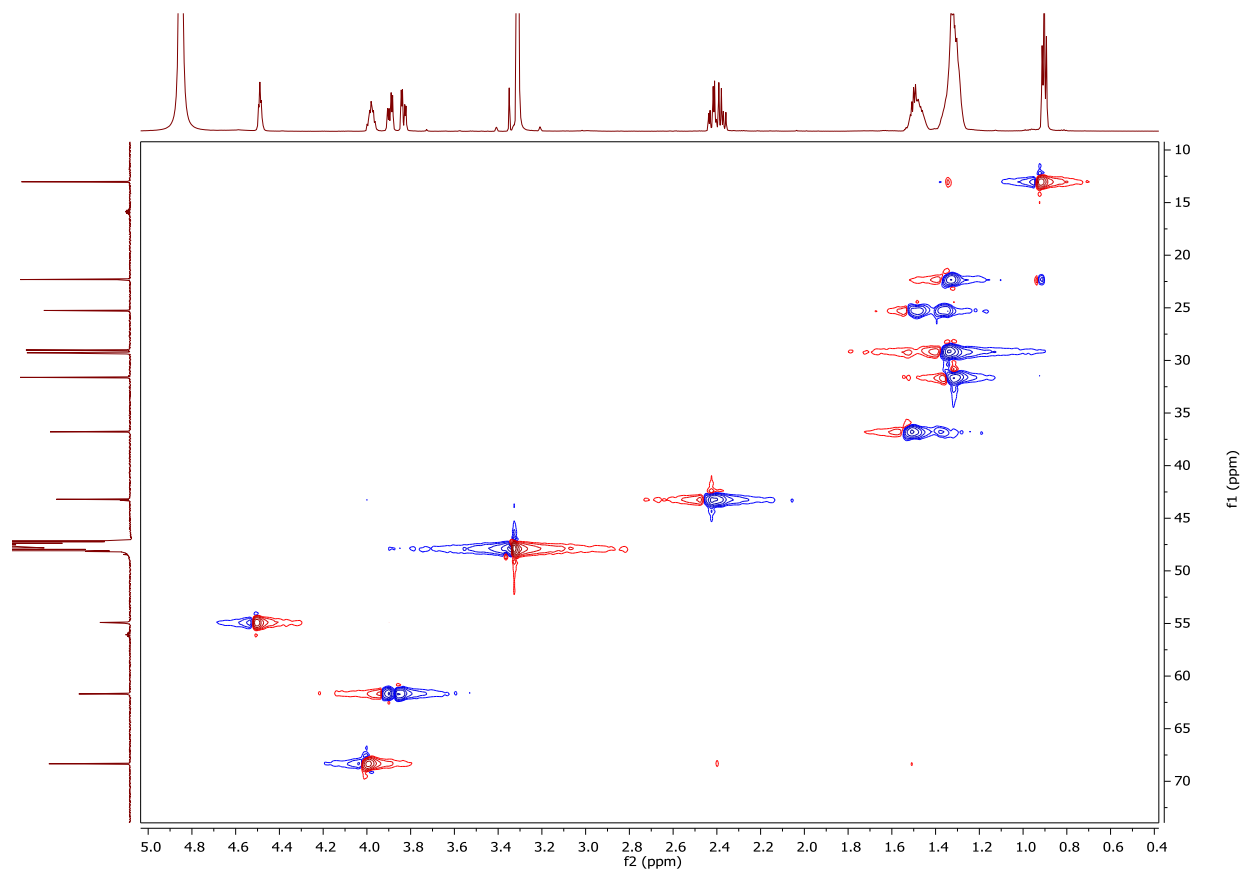

**Fig. S89.** HMBC NMR spectrum of serratamic acid (N-(D-3-hydroxydecanoyl)-L-serine, compound **31**, MeOD).

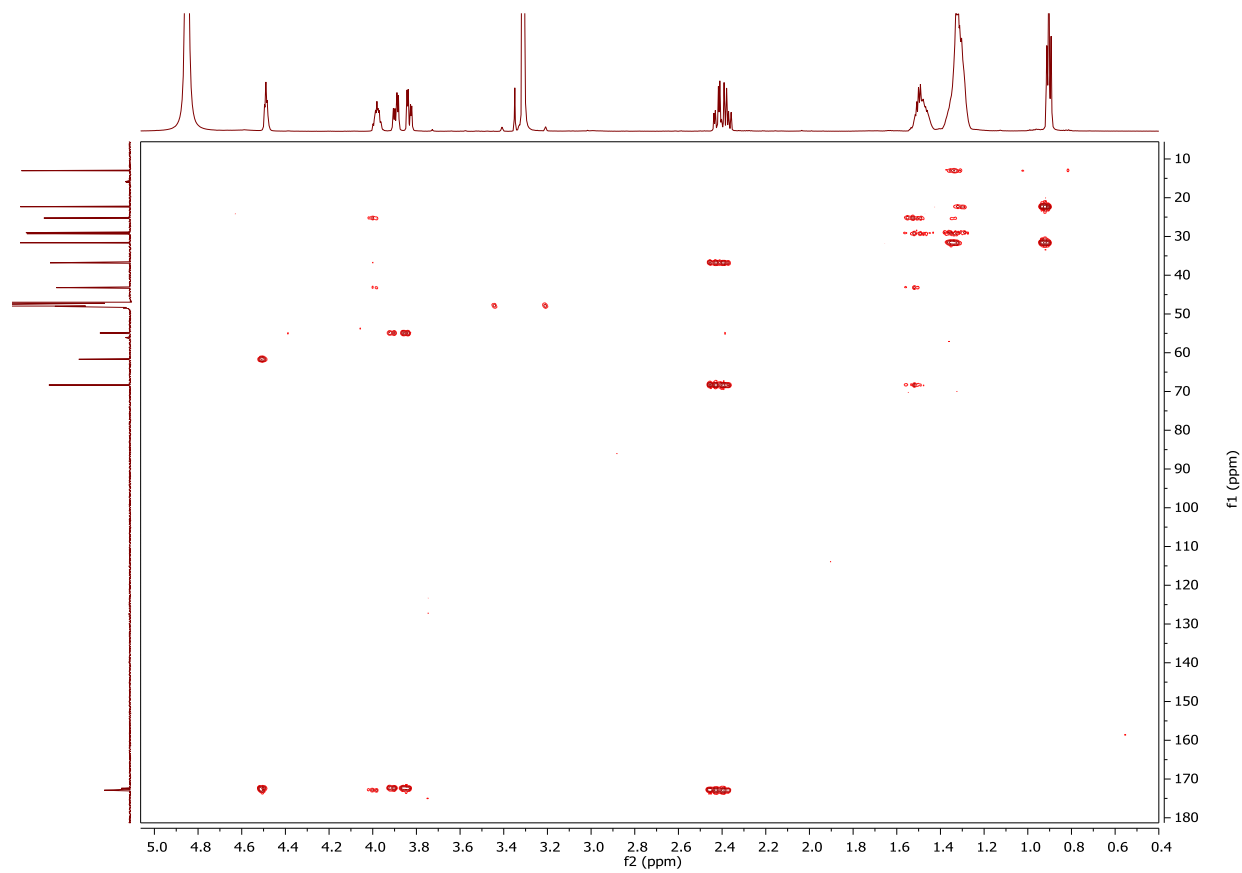

**Fig. S90.**  $^1\text{H}$ -NMR spectrum of prodigiosin (compound **3**,  $\text{CDCl}_3$ , 600 MHz).

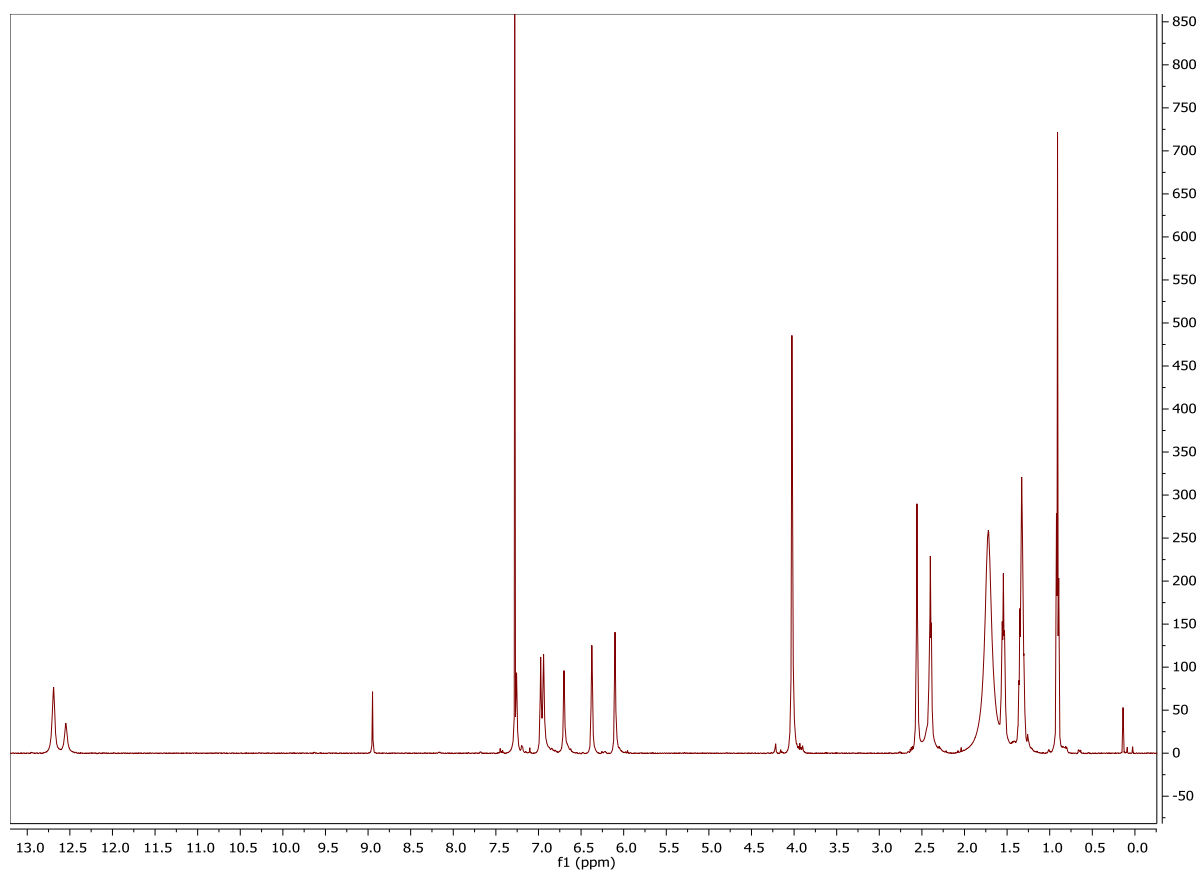

**Fig. S91.** COSY NMR spectrum of prodigiosin (compound **3**, CDCl<sub>3</sub>, 600 MHz).

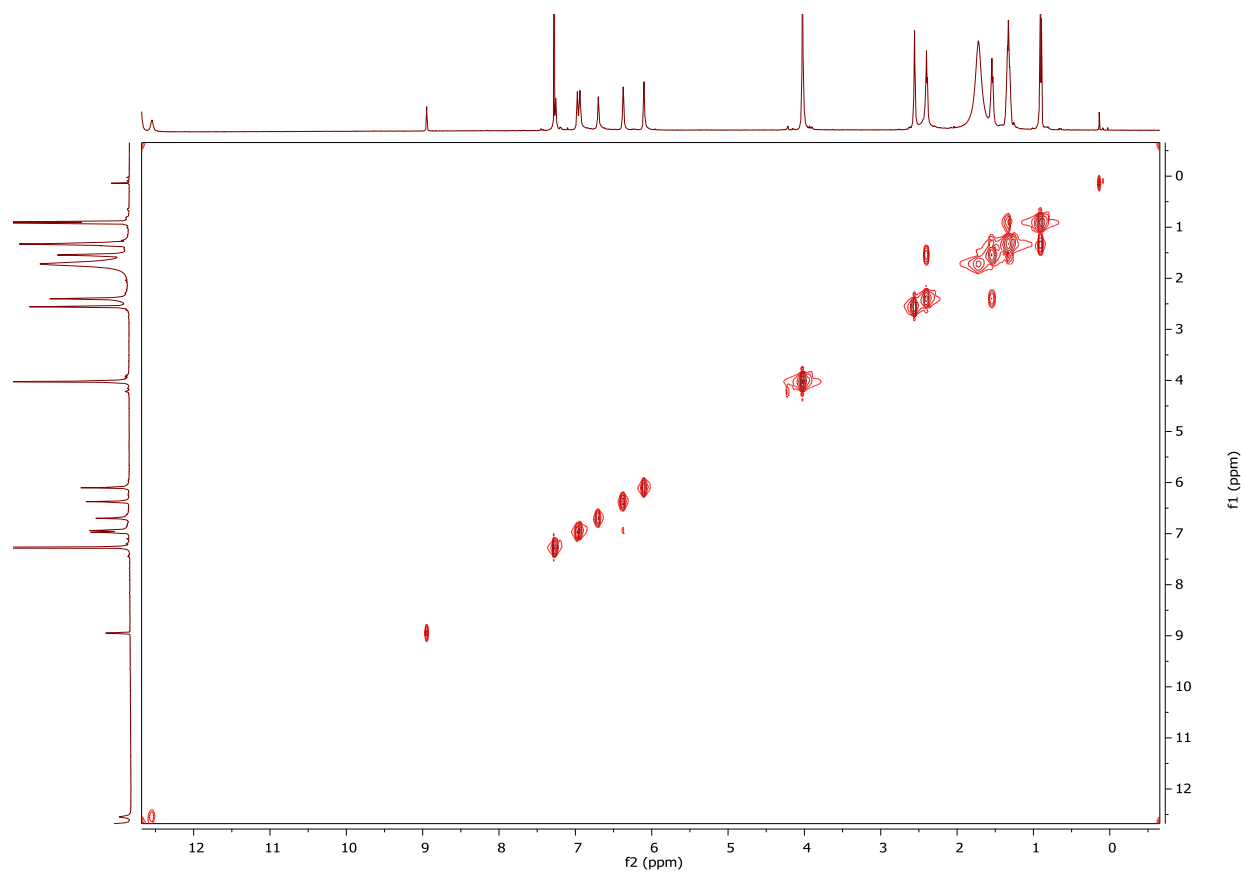

**Fig. S92.** HRMS spectra of 2-methyl-3-propyl prodiginine (compound **1**  $[M+H]^+$ :  $m/z$  296,  $C_{18}H_{22}N_3O$ ).

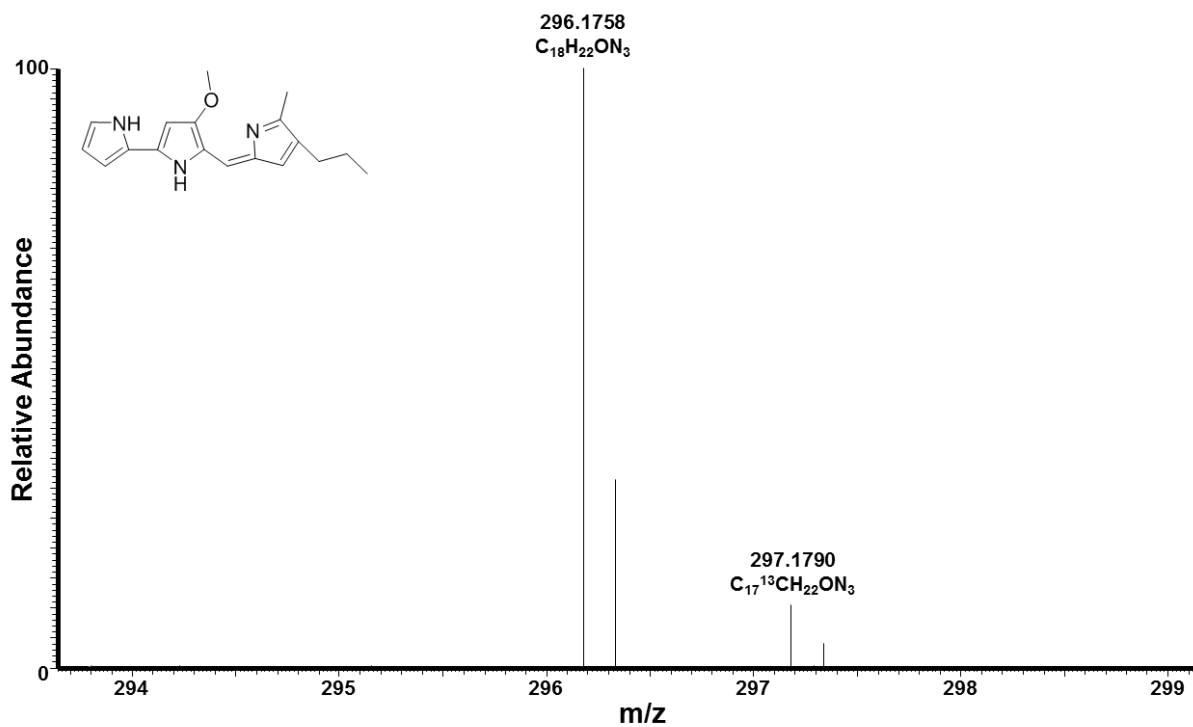

**Fig. S93.** HRMS spectra of 2-methyl-3-butyl prodiginine (compound **2**  $[M+H]^+$ :  $m/z$  310,  $C_{19}H_{24}N_3O$ ).

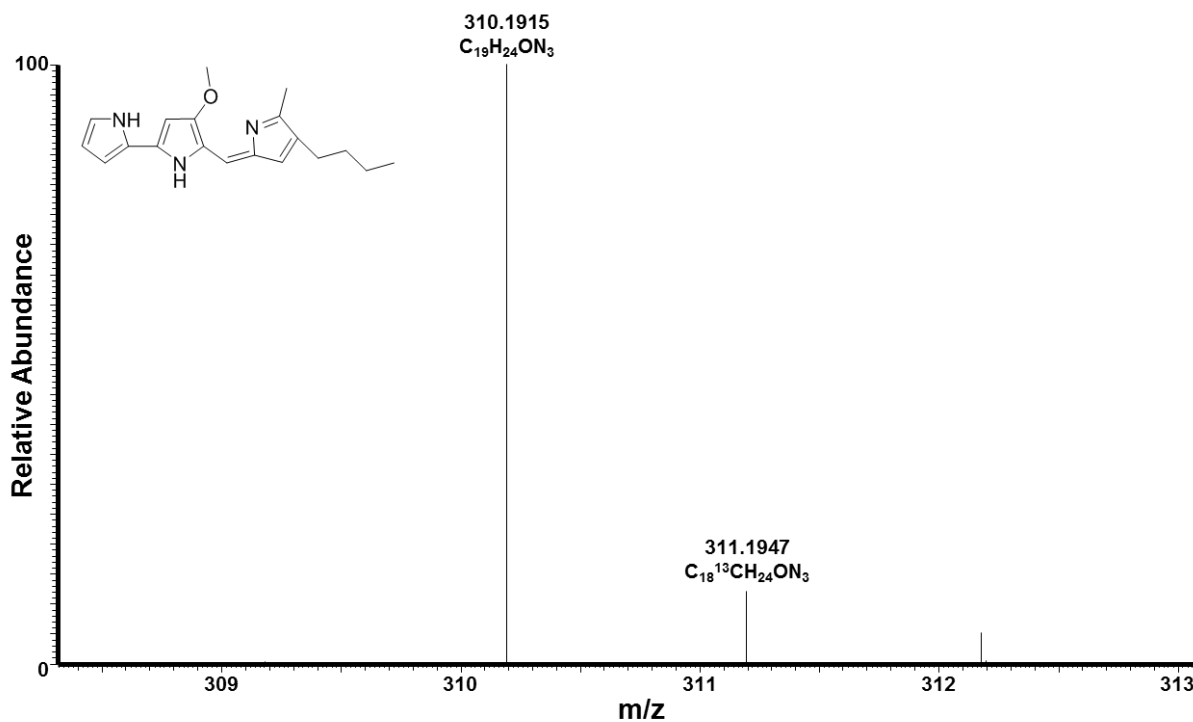



Fig. S94. HRMS spectra of prodiginosin (compound 3  $[M+H]^+$ :  $m/z$  324,  $C_{20}H_{26}N_3O$ ).

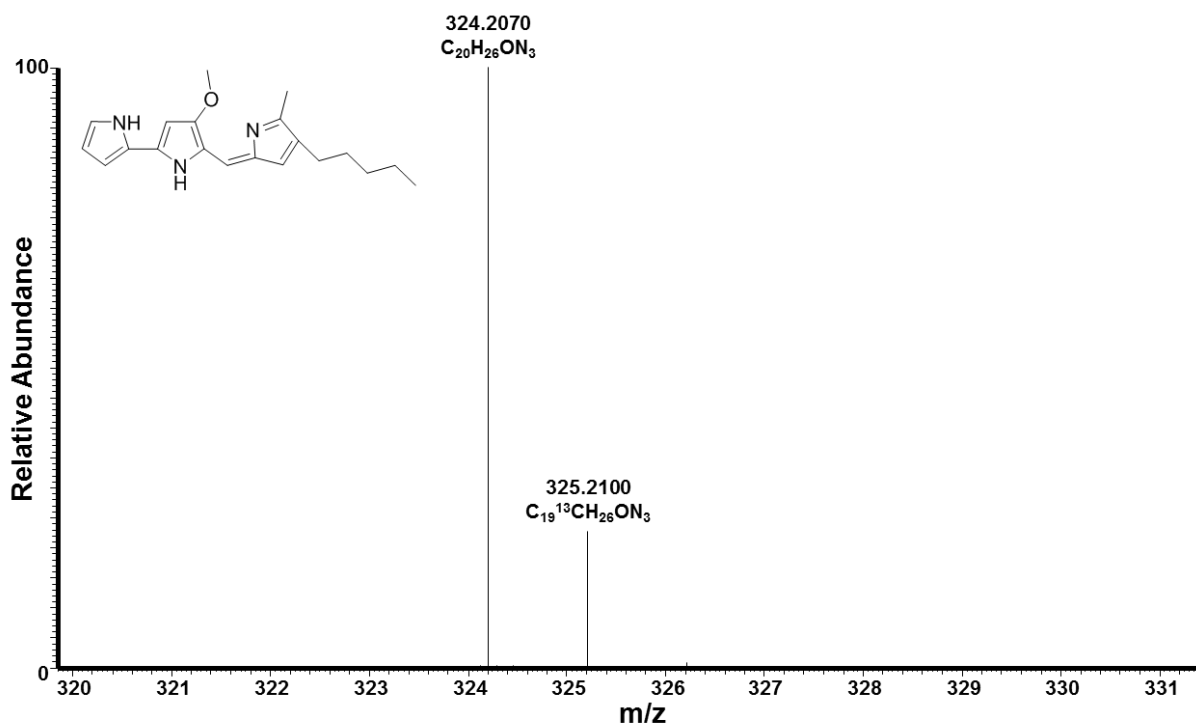

Fig. S95. HRMS spectra of 2-methyl-3-hexyl prodiginine (compound 4  $[M+H]^+$ :  $m/z$  338,  $C_{21}H_{28}N_3O$ ).

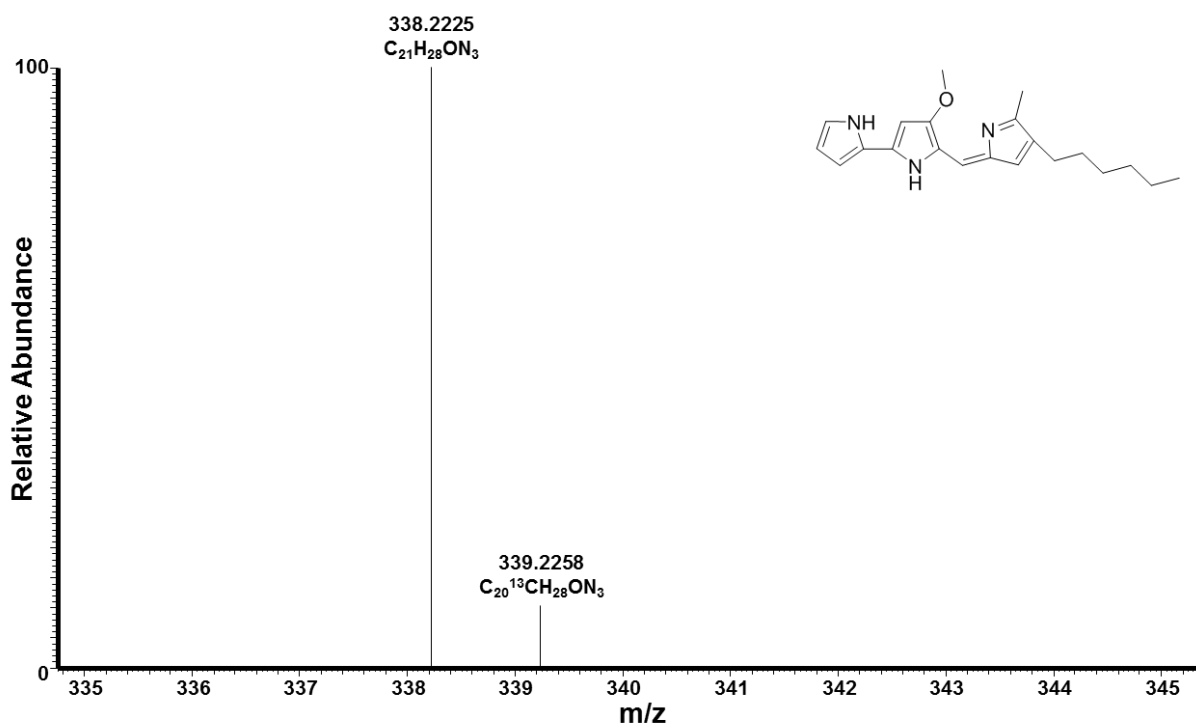

**Fig. S96.** HRMS spectra of 2-methyl-3-heptyl prodiginine (compound **5**  $[M+H]^+$ :  $m/z$  352,  $C_{22}H_{30}N_3O$ ).

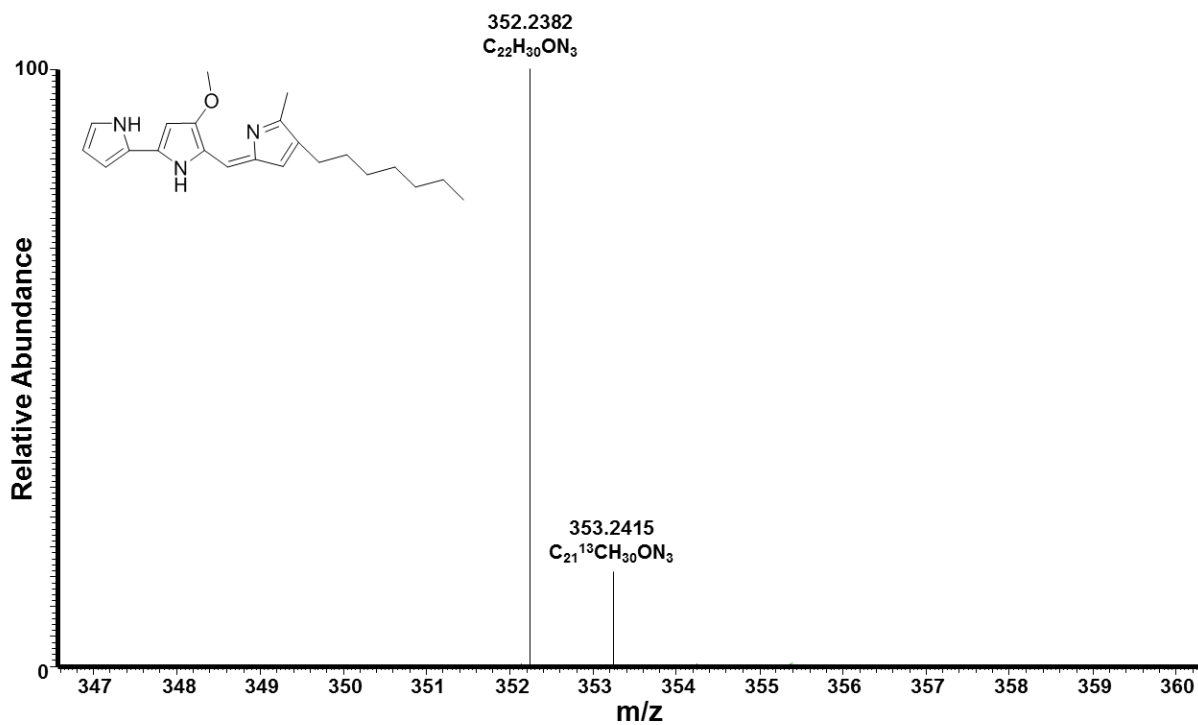

**Fig. S97.** HRMS spectra of 2-methyl-3-octyl prodiginine (compound **6**  $[M+H]^+$ :  $m/z$  366,  $C_{23}H_{32}N_3O$ ).

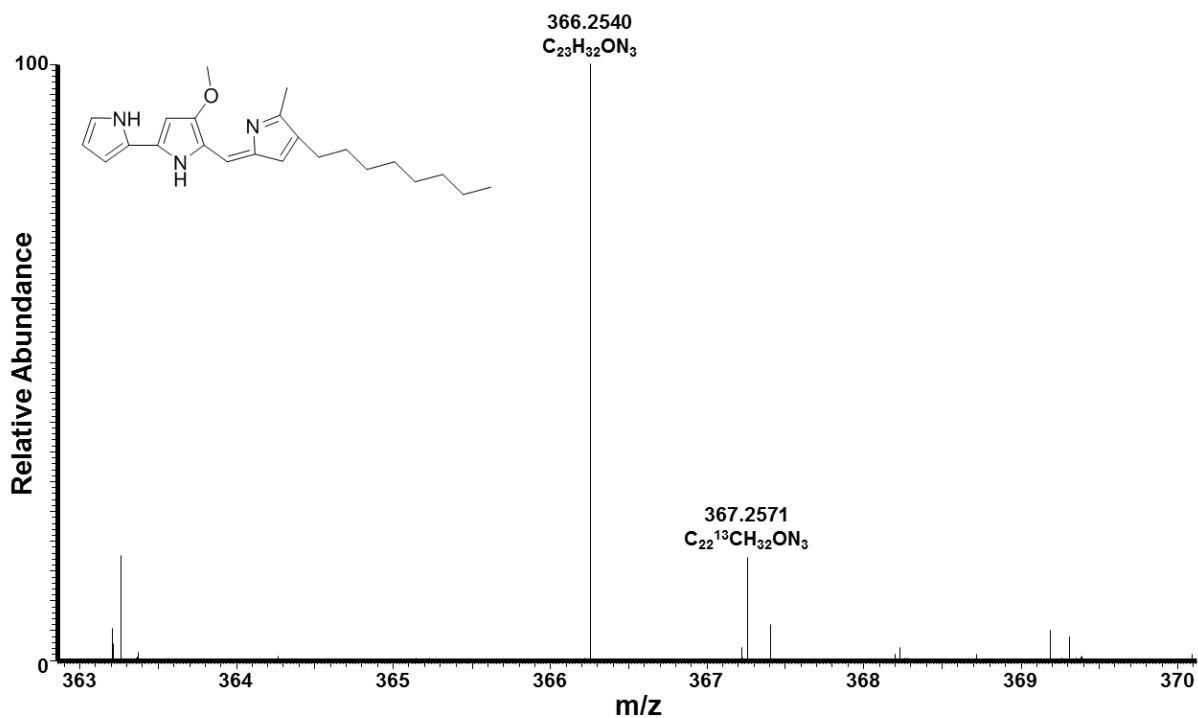

**Fig. S98.** HRMS spectra of 2-methyl-3-nonyl prodiginine (compound **7**  $[M+H]^+$ :  $m/z$  380,  $C_{24}H_{34}N_3O$ ).

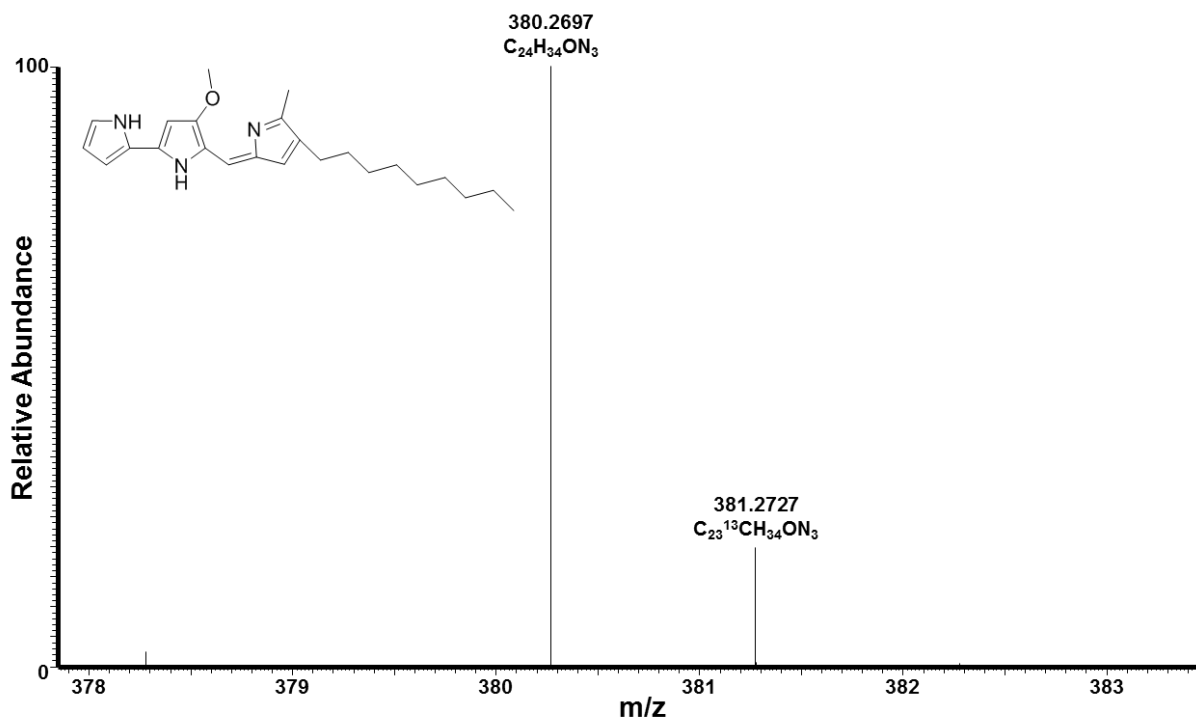

**Fig. S99.** HRMS spectra of 2-methyl-3-propyl prodiginine with incorporated  $^{15}N$  derived from  $^{15}NH_4Cl$  (compound **1**  $[M+H]^+$ :  $m/z$  297,  $C_{18}H_{22}N_2^{15}NO$ ).

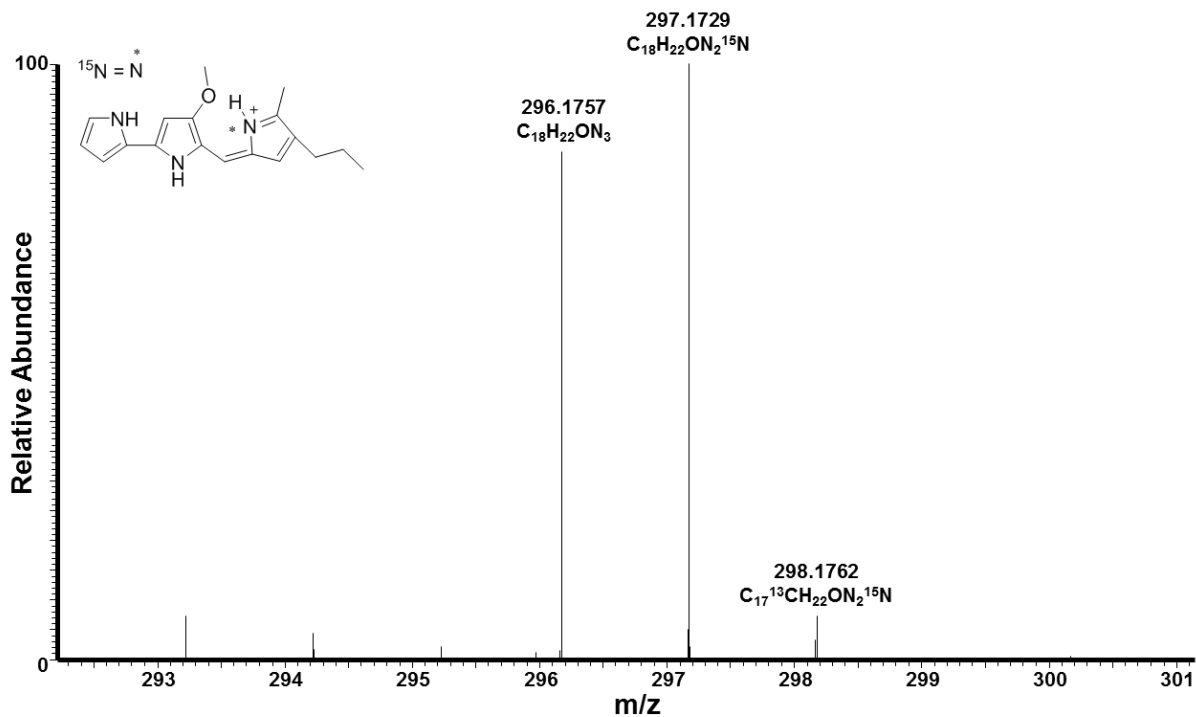

**Fig. S100.** HRMS spectra of 2-methyl-3-butyl prodiginine with incorporated  $^{15}\text{N}$  derived from  $^{15}\text{NH}_4\text{Cl}$  (compound **2**  $[\text{M}+\text{H}]^+$ :  $m/z$  311,  $\text{C}_{19}\text{H}_{24}\text{N}_2^{15}\text{NO}$ ).

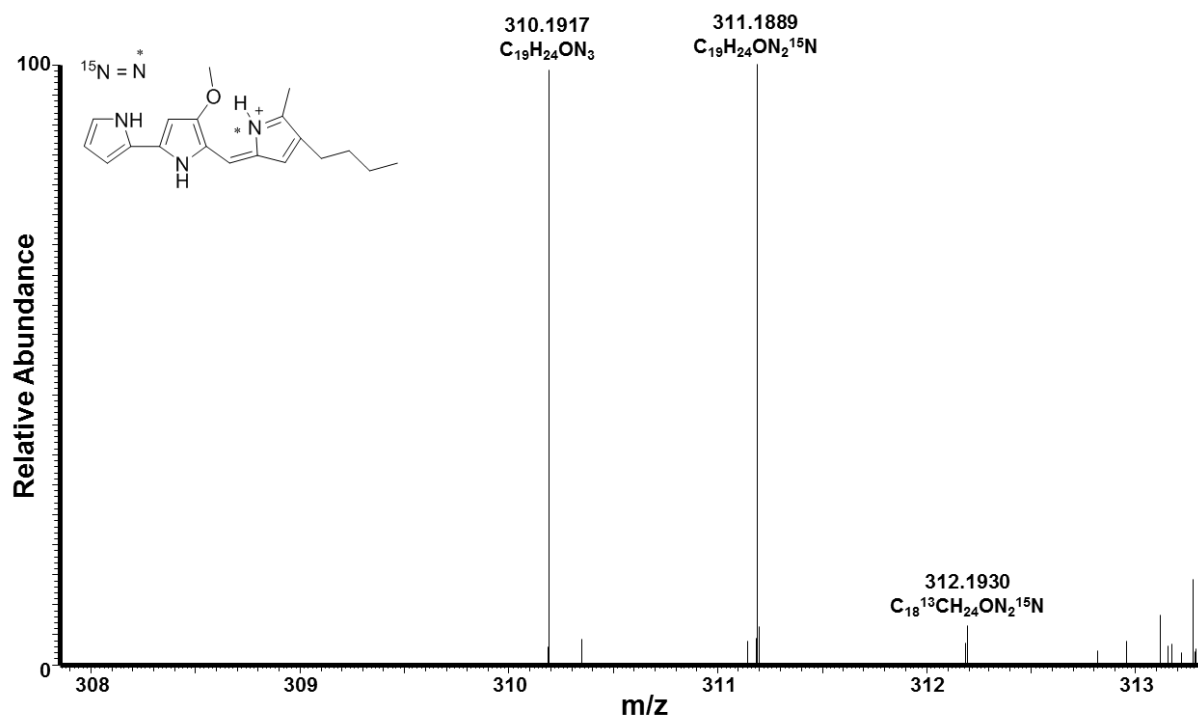

**Fig. S101.** HRMS spectra of prodiginosin with incorporated  $^{15}\text{N}$  derived from  $^{15}\text{NH}_4\text{Cl}$  (compound **3**  $[\text{M}+\text{H}]^+$ :  $m/z$  325,  $\text{C}_{20}\text{H}_{26}\text{N}_2^{15}\text{NO}$ ).

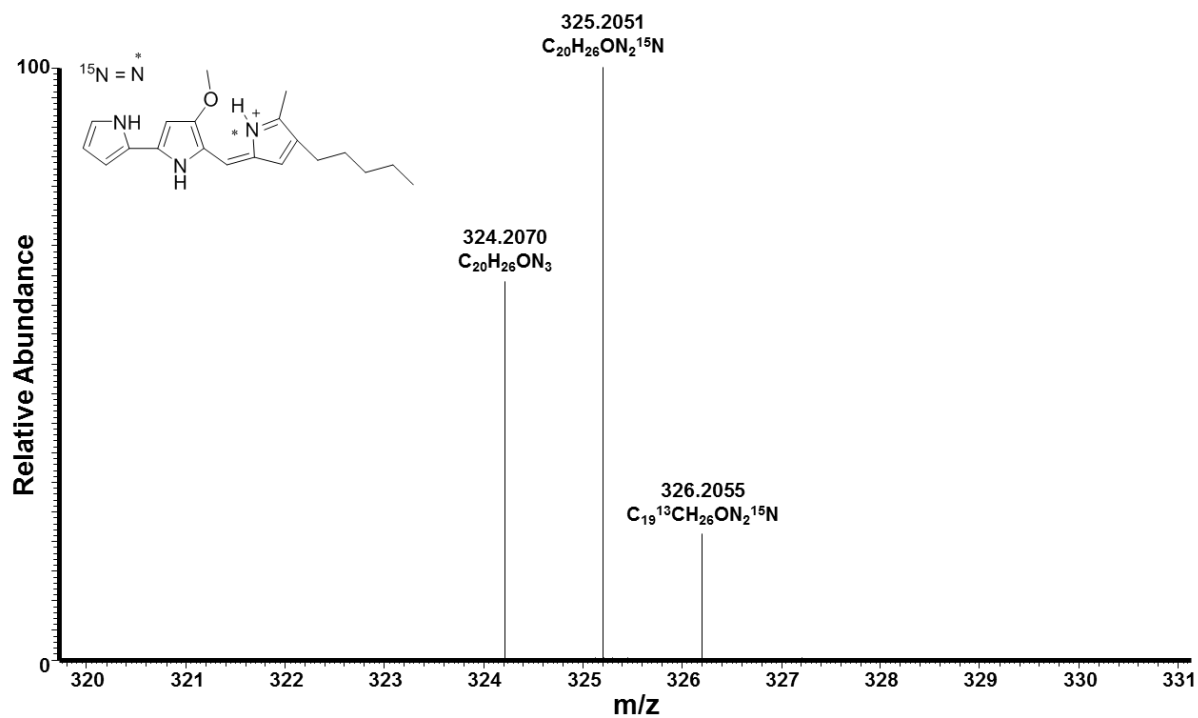

**Fig. S102.** HRMS spectra of 2-methyl-3-hexyl prodiginine with incorporated  $^{15}\text{N}$  derived from  $^{15}\text{NH}_4\text{Cl}$  (compound **4**  $[\text{M}+\text{H}]^+$ :  $m/z$  339,  $\text{C}_{21}\text{H}_{28}\text{N}_2^{15}\text{NO}$ ).

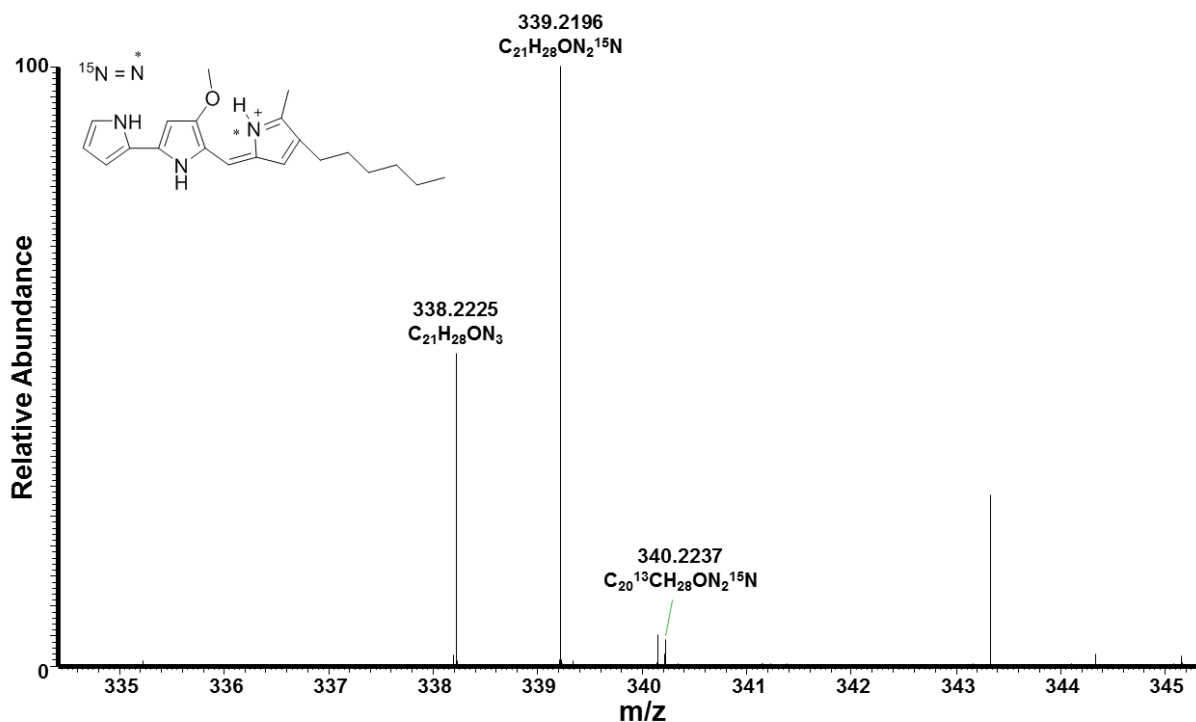

**Fig. S103.** HRMS spectra of 2-methyl-3-heptyl prodiginine with incorporated  $^{15}\text{N}$  derived from  $^{15}\text{NH}_4\text{Cl}$  (compound **5**  $[\text{M}+\text{H}]^+$ :  $m/z$  353,  $\text{C}_{22}\text{H}_{30}\text{N}_2^{15}\text{NO}$ ).

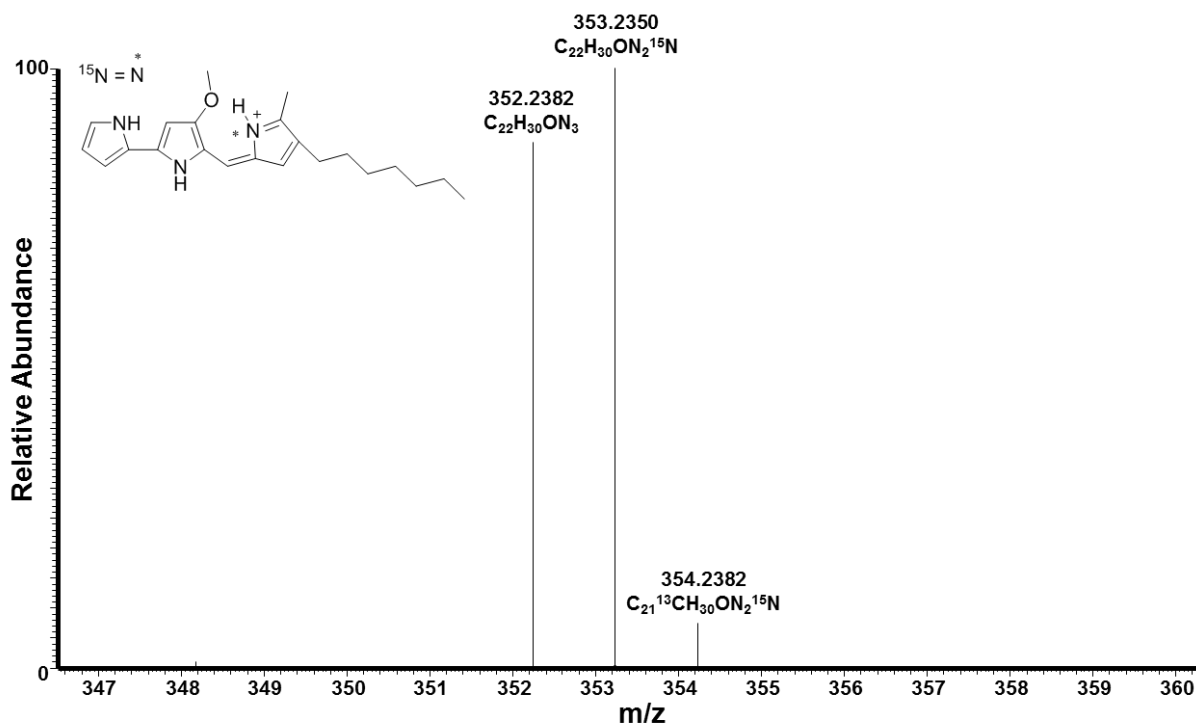

**Fig. S104.** HRMS spectra of 2-methyl-3-nonyl prodiginine with incorporated  $^{15}\text{N}$  derived from  $^{15}\text{NH}_4\text{Cl}$  (compound **7**  $[\text{M}+\text{H}]^+$ :  $m/z$  381,  $\text{C}_{24}\text{H}_{34}\text{N}_2^{15}\text{NO}$ ).

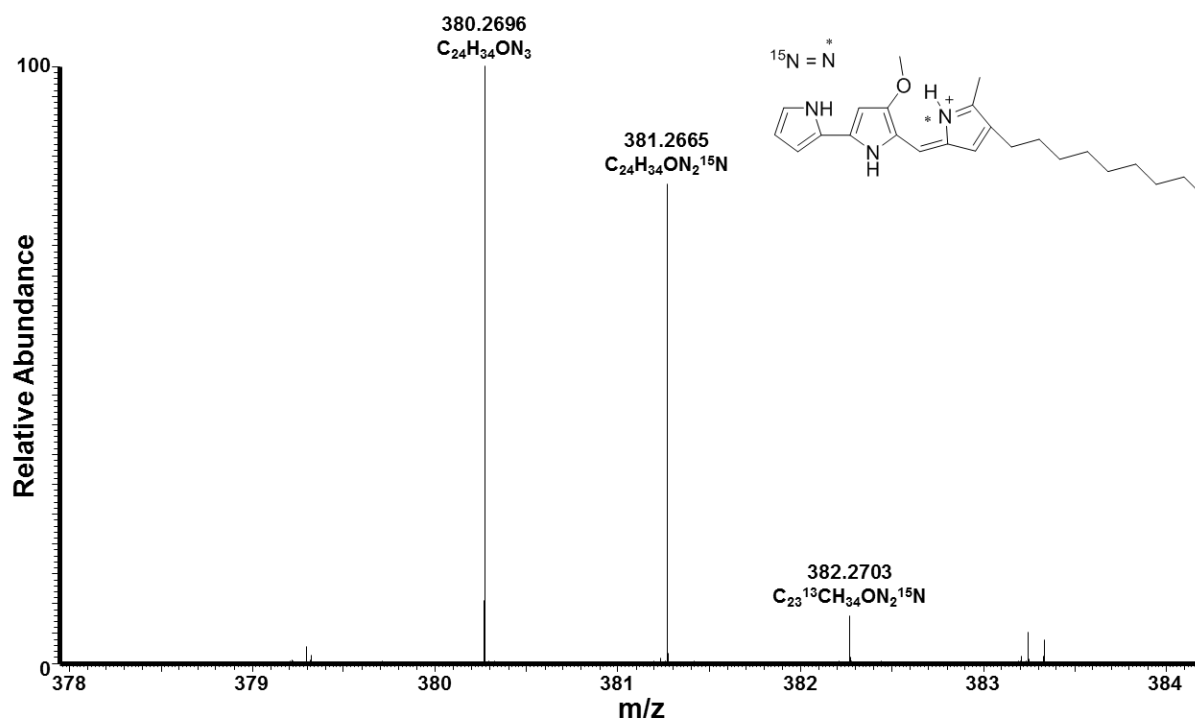

**Fig. S105.** HRMS spectra of 2-methyl-3-propyl prodiginine with incorporated methyl- $\text{D}_3$  group derived from [methyl- $\text{D}_3$ ]-L-methionine (compound **1**  $[\text{M}+\text{H}]^+$ :  $m/z$  299,  $\text{C}_{18}\text{H}_{19}\text{D}_3\text{N}_3\text{O}$ ).

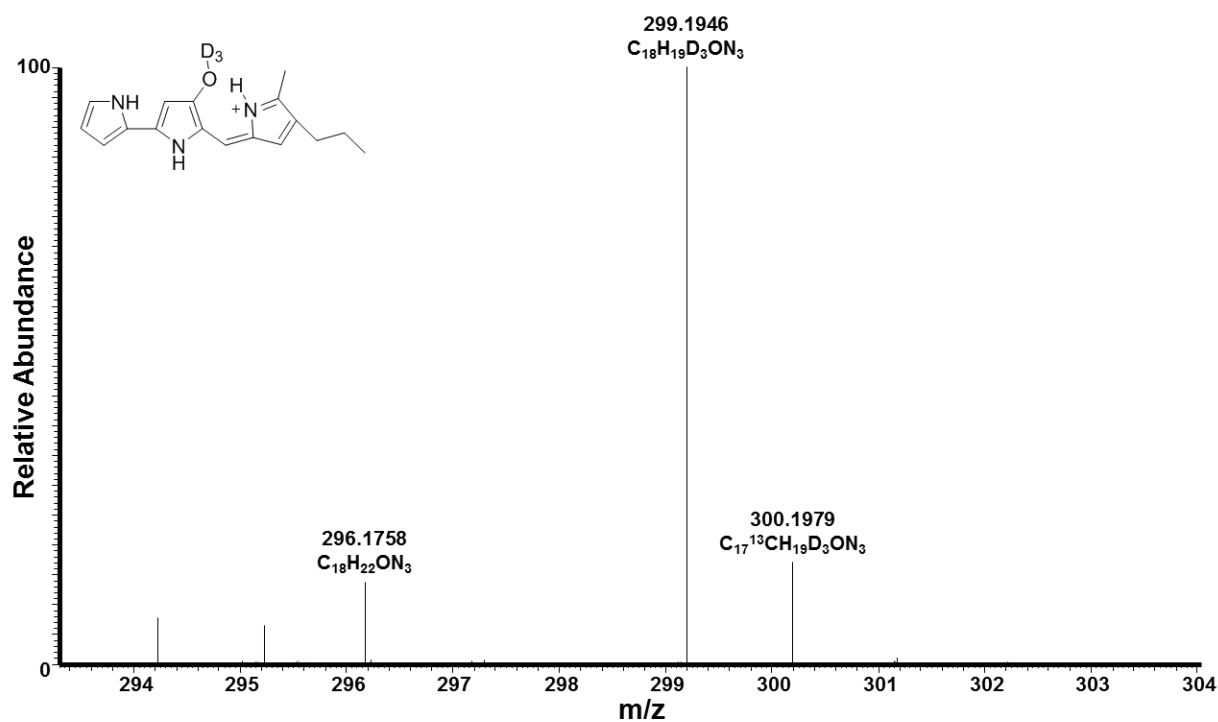

**Fig. S106.** HRMS spectra of 2-methyl-3-butyl prodiginine with incorporated methyl-D<sub>3</sub> group derived from [methyl-D<sub>3</sub>]-L-methionine (compound **2** [M+H]<sup>+</sup>: *m/z* 313, C<sub>19</sub>H<sub>21</sub>D<sub>3</sub>N<sub>3</sub>O).

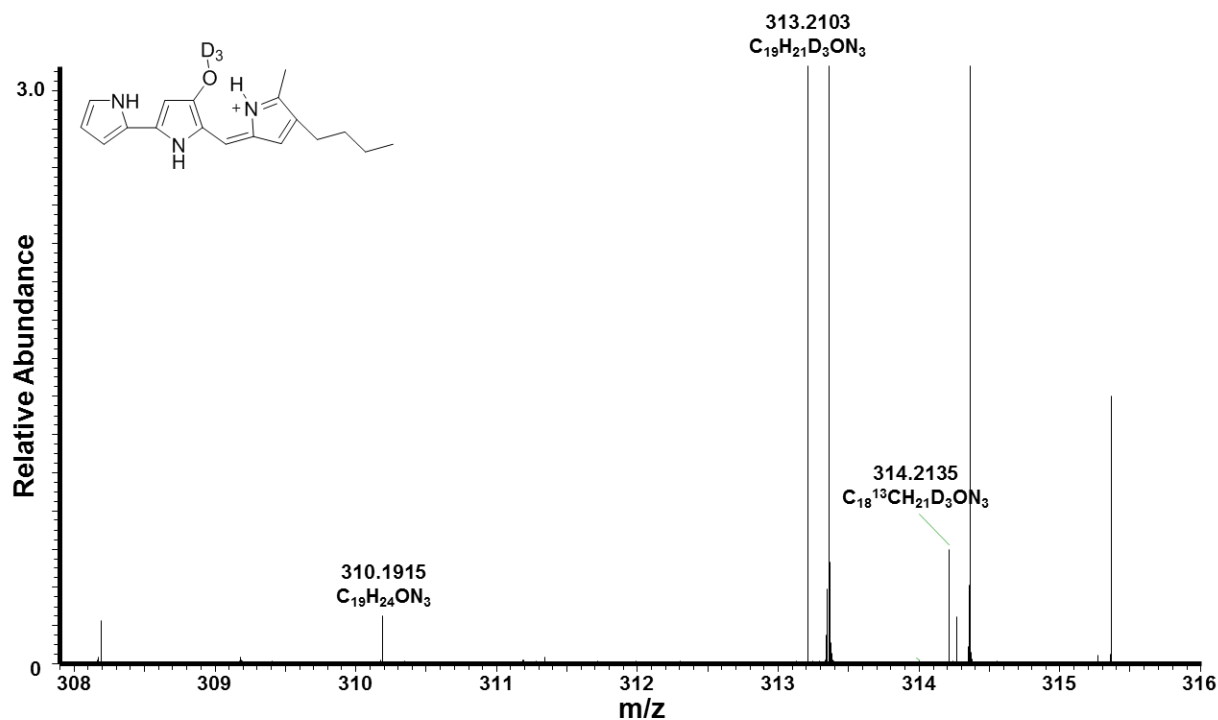

**Fig. S107.** HRMS spectra of prodigiosin with incorporated methyl-D<sub>3</sub> group derived from [methyl-D<sub>3</sub>]-L-methionine (compound **3** [M+H]<sup>+</sup>: *m/z* 327, C<sub>20</sub>H<sub>23</sub>D<sub>3</sub>N<sub>3</sub>O).

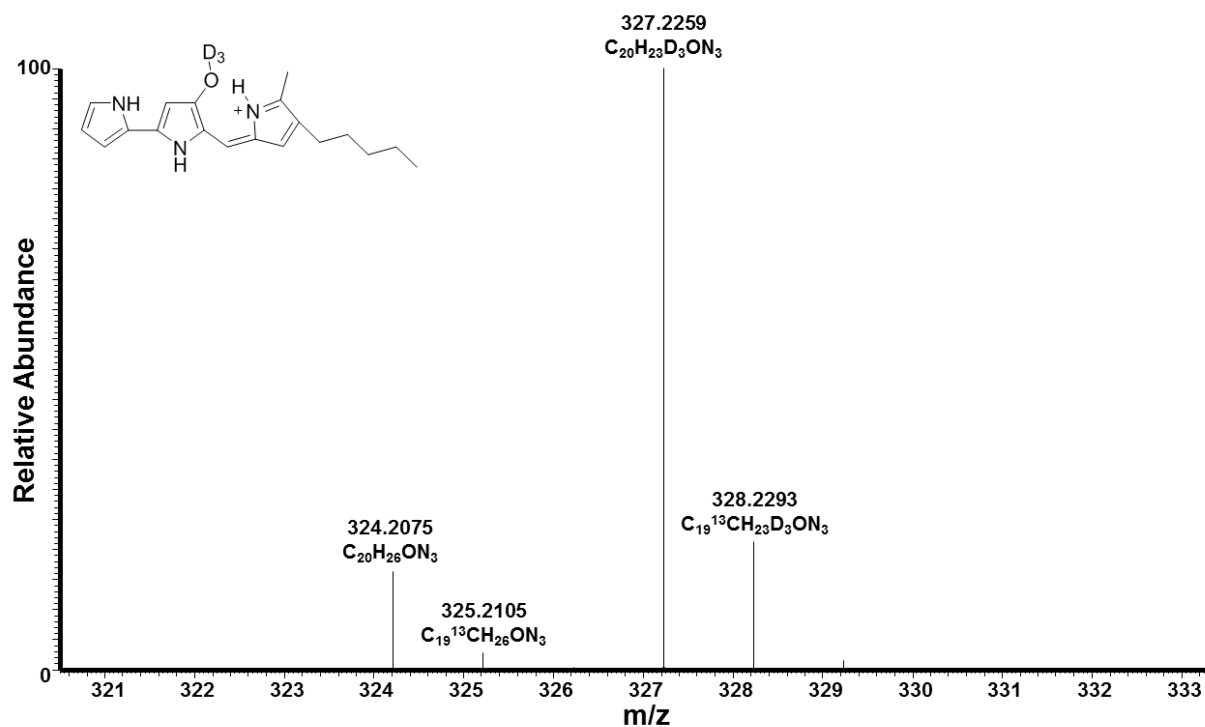

**Fig. S108.** HRMS spectra of 2-methyl-3-hexyl prodiginine with incorporated methyl-D<sub>3</sub> group derived from [methyl-D<sub>3</sub>]-L-methionine (compound **4** [M+H]<sup>+</sup>: *m/z* 341, C<sub>21</sub>H<sub>25</sub>D<sub>3</sub>N<sub>3</sub>O).

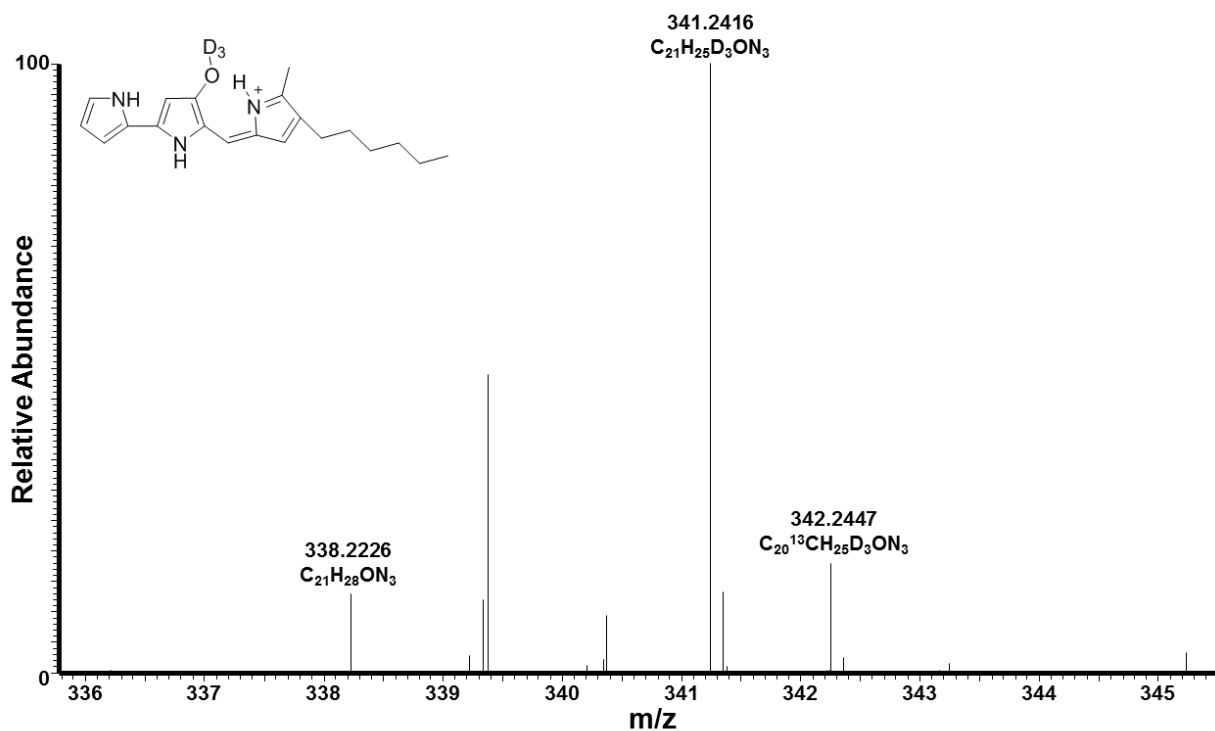

**Fig. S109.** HRMS spectra of 2-methyl-3-heptyl prodiginine with incorporated methyl-D<sub>3</sub> group derived from [methyl-D<sub>3</sub>]-L-methionine (compound **5** [M+H]<sup>+</sup>: *m/z* 355, C<sub>22</sub>H<sub>27</sub>D<sub>3</sub>N<sub>3</sub>O).

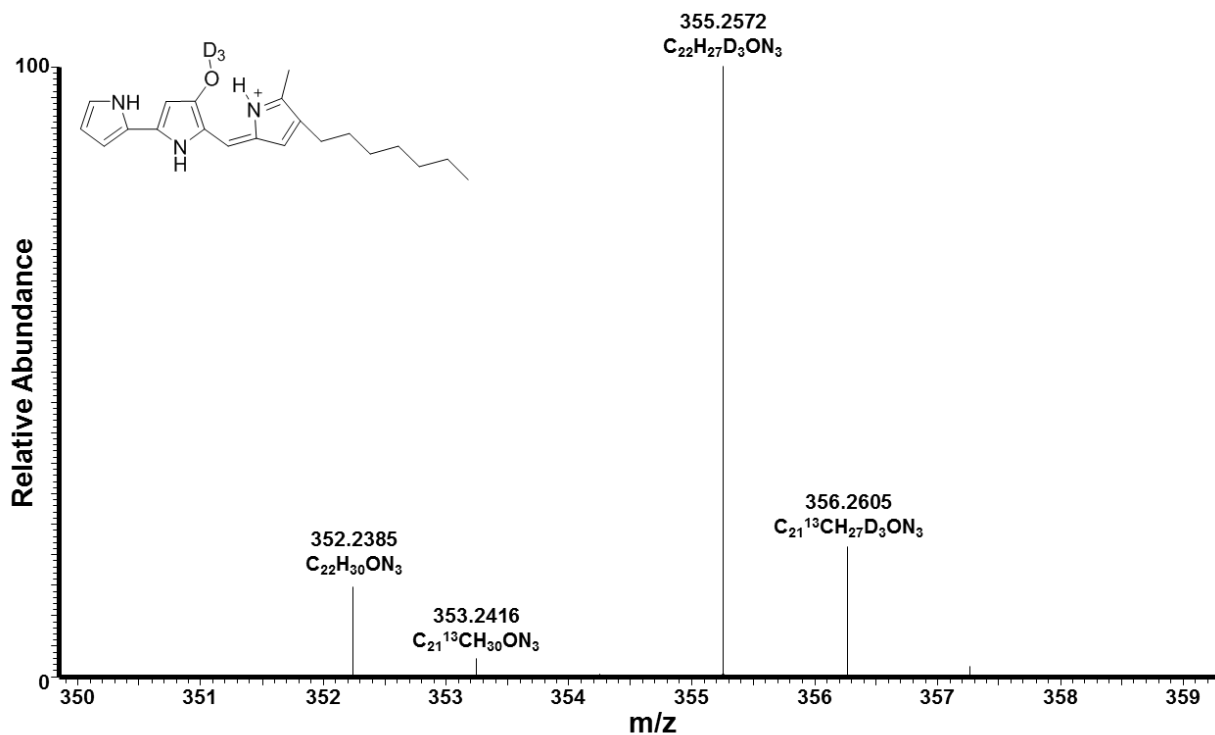



**Fig. S110.** HRMS spectra of 2-methyl-3-nonyl prodiginine with incorporated methyl-D<sub>3</sub> group derived from [methyl-D<sub>3</sub>]-L-methionine (compound **7** [M+H]<sup>+</sup>: *m/z* 383, C<sub>24</sub>H<sub>31</sub>D<sub>3</sub>N<sub>3</sub>O).

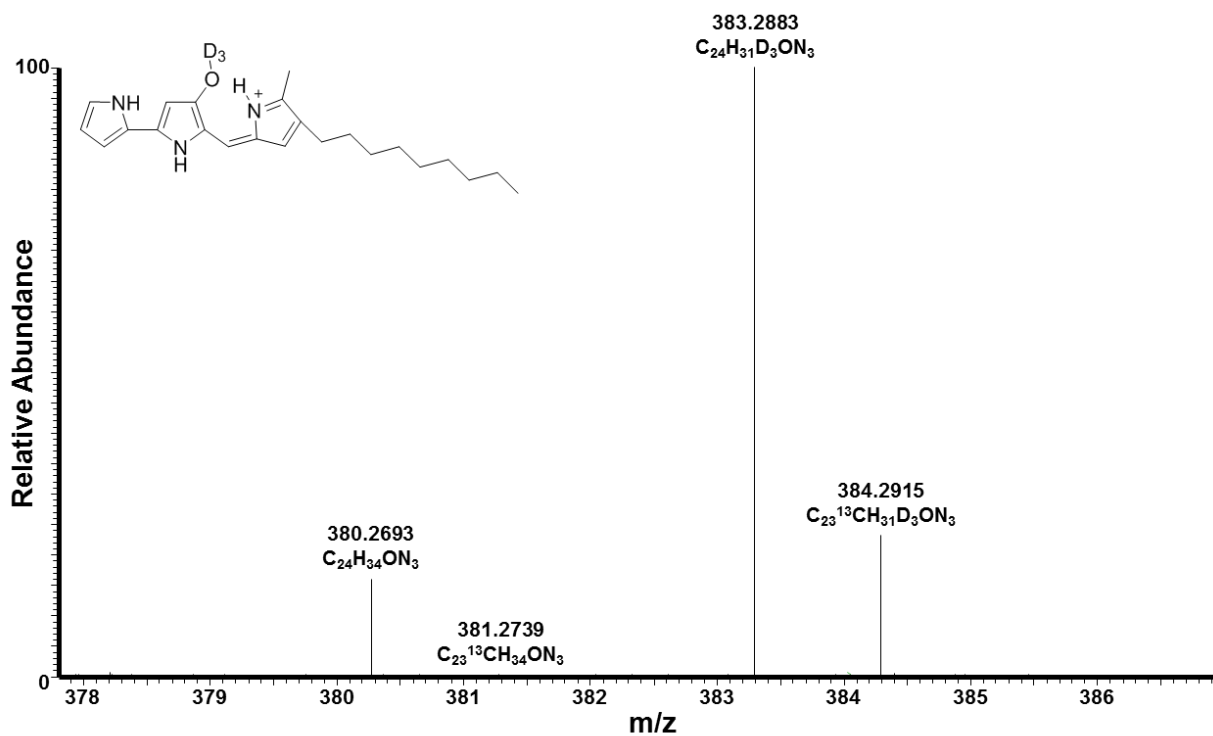

**Fig. S111.** HRMS spectra of 2-methyl-3-propyl prodiginine with incorporated [1-<sup>13</sup>C]-L-proline (compound **1** [M+H]<sup>+</sup>: *m/z* 297, C<sub>17</sub><sup>13</sup>CH<sub>22</sub>N<sub>3</sub>O).

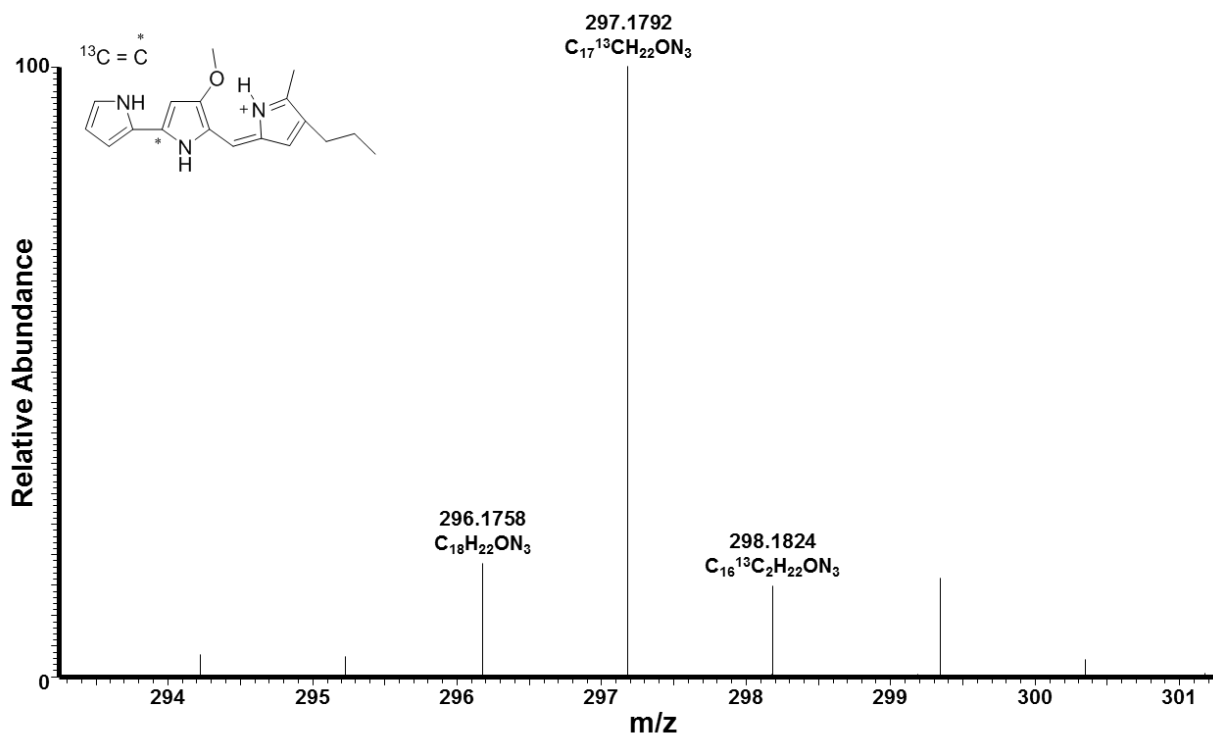

**Fig. S112.** HRMS spectra of 2-methyl-3-butyl prodiginine with incorporated [1-<sup>13</sup>C]-L-proline (compound **2** [M+H]<sup>+</sup>: *m/z* 311, C<sub>18</sub><sup>13</sup>CH<sub>24</sub>N<sub>3</sub>O).

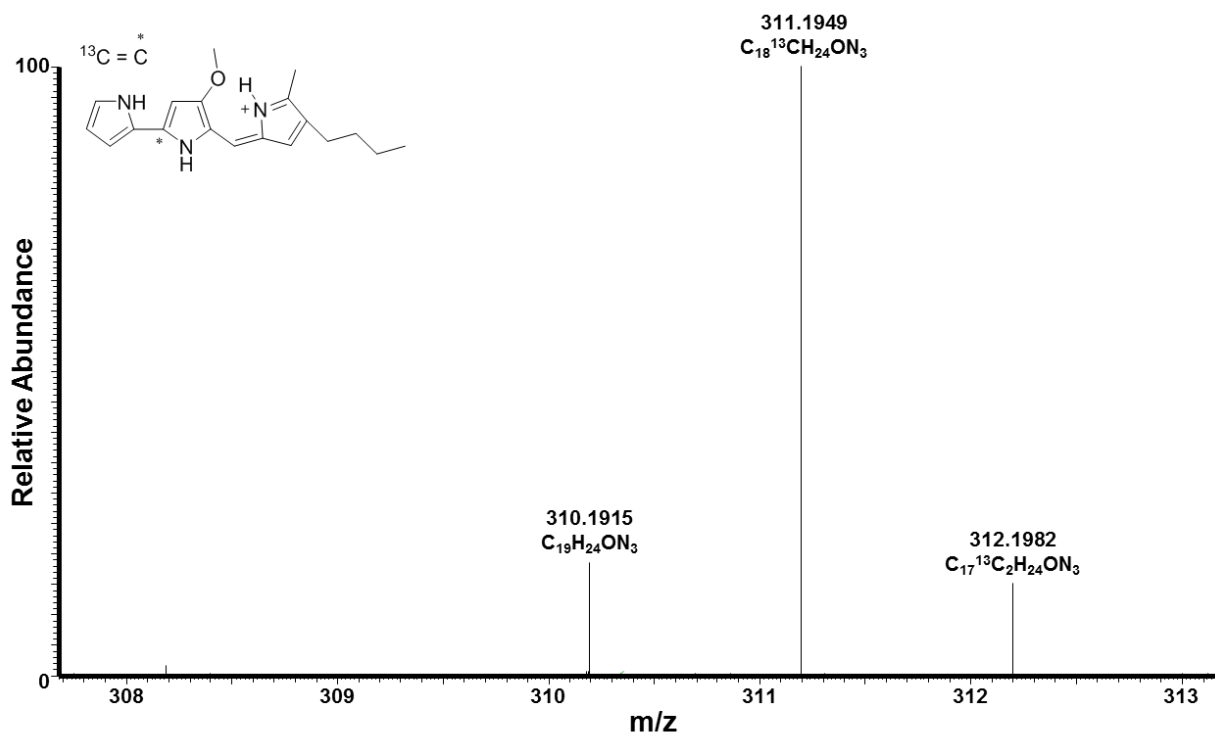

**Fig. S113.** HRMS spectra of prodigiosin with incorporated [1-<sup>13</sup>C]-L-proline (compound **3** [M+H]<sup>+</sup>: *m/z* 325, C<sub>19</sub><sup>13</sup>CH<sub>26</sub>N<sub>3</sub>O).

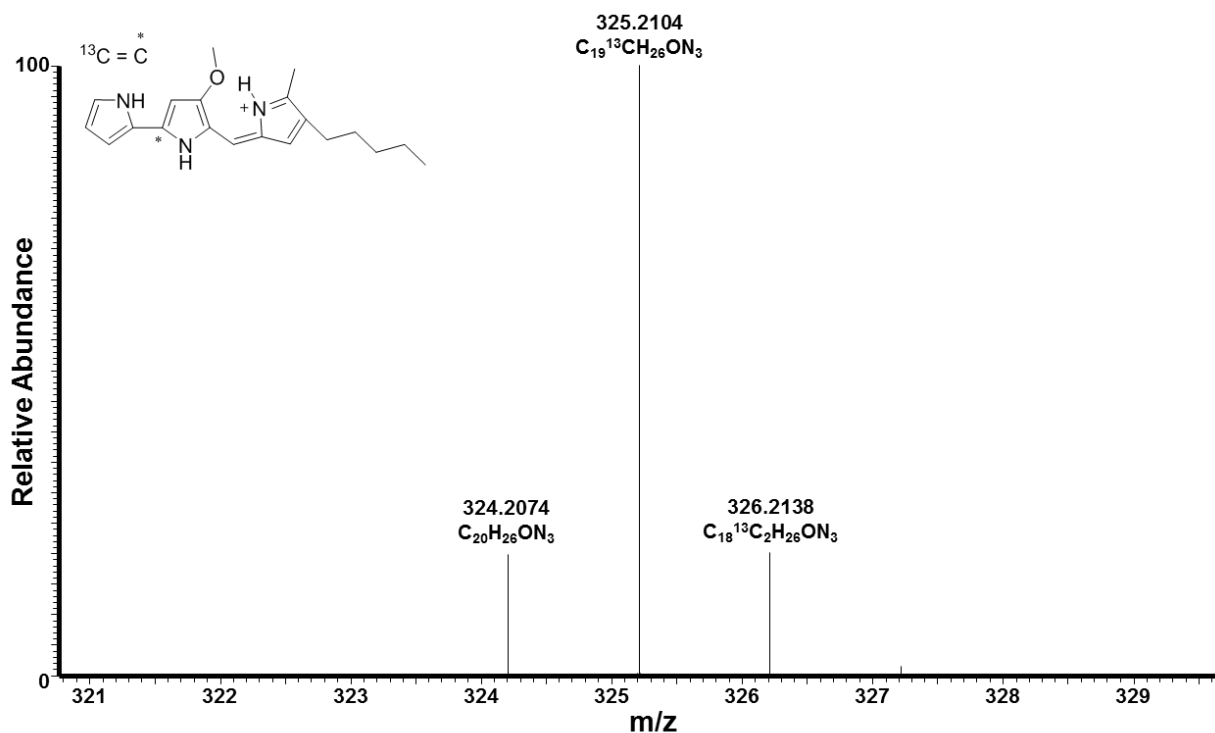

**Fig. S114.** HRMS spectra of 2-methyl-3-hexyl prodiginine with incorporated [1-<sup>13</sup>C]-L-proline (compound **4** [M+H]<sup>+</sup>: *m/z* 339, C<sub>20</sub><sup>13</sup>CH<sub>28</sub>N<sub>3</sub>O).

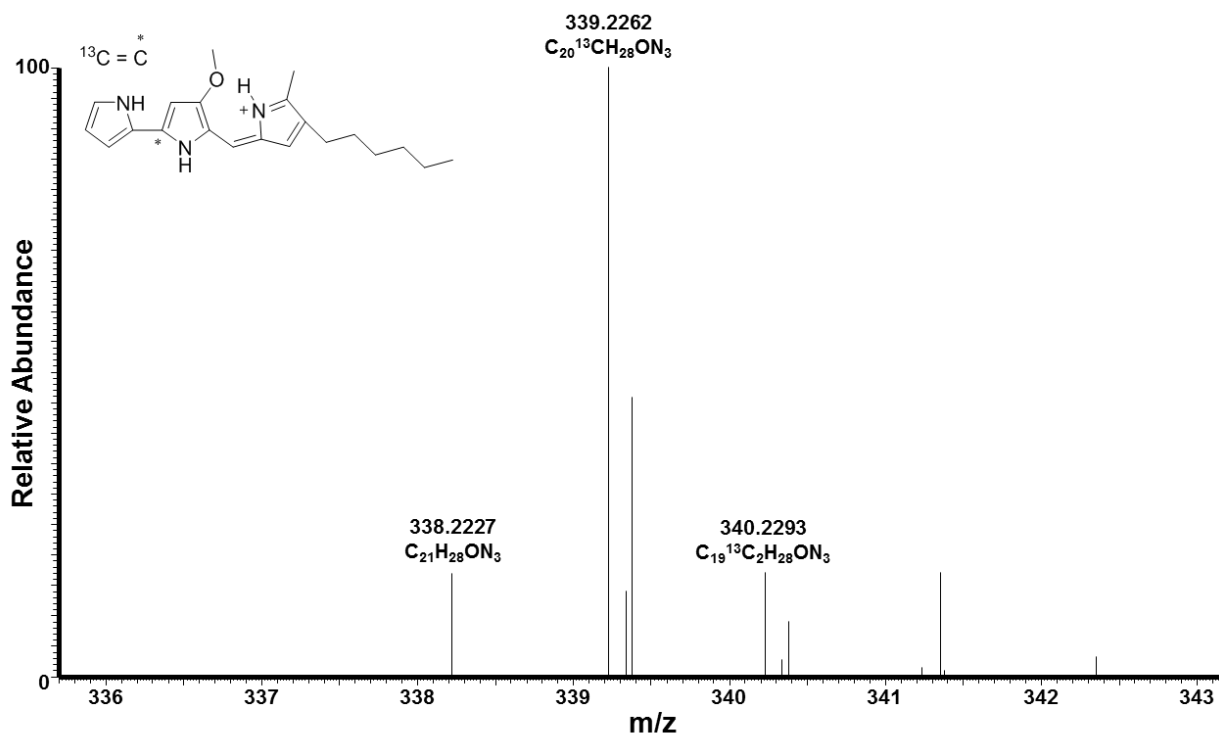

**Fig. S115.** HRMS spectra of 2-methyl-3-heptyl prodiginine with incorporated [1-<sup>13</sup>C]-L-proline (compound **5** [M+H]<sup>+</sup>: *m/z* 353, C<sub>21</sub><sup>13</sup>CH<sub>30</sub>N<sub>3</sub>O).

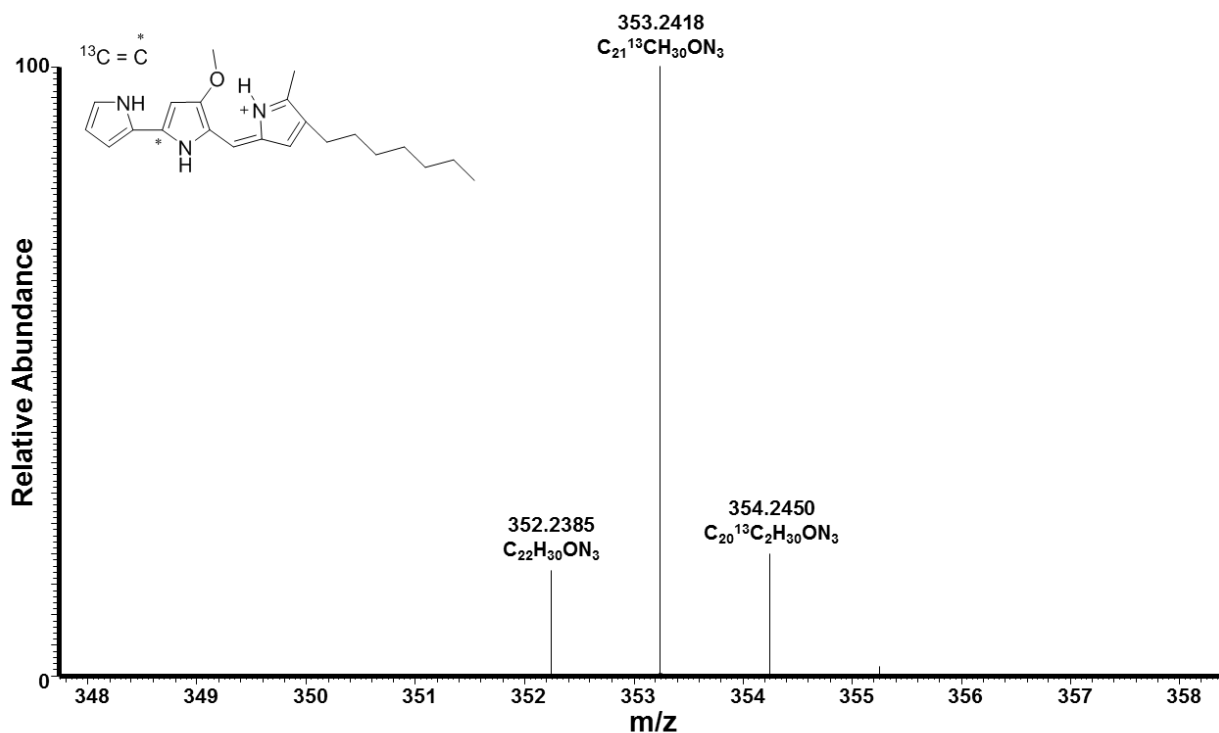

**Fig. S116.** HRMS spectra of 2-methyl-3-nonyl prodiginine with incorporated [1-<sup>13</sup>C]-L-proline (compound **7** [M+H]<sup>+</sup>: *m/z* 381, C<sub>23</sub><sup>13</sup>CH<sub>34</sub>N<sub>3</sub>O).

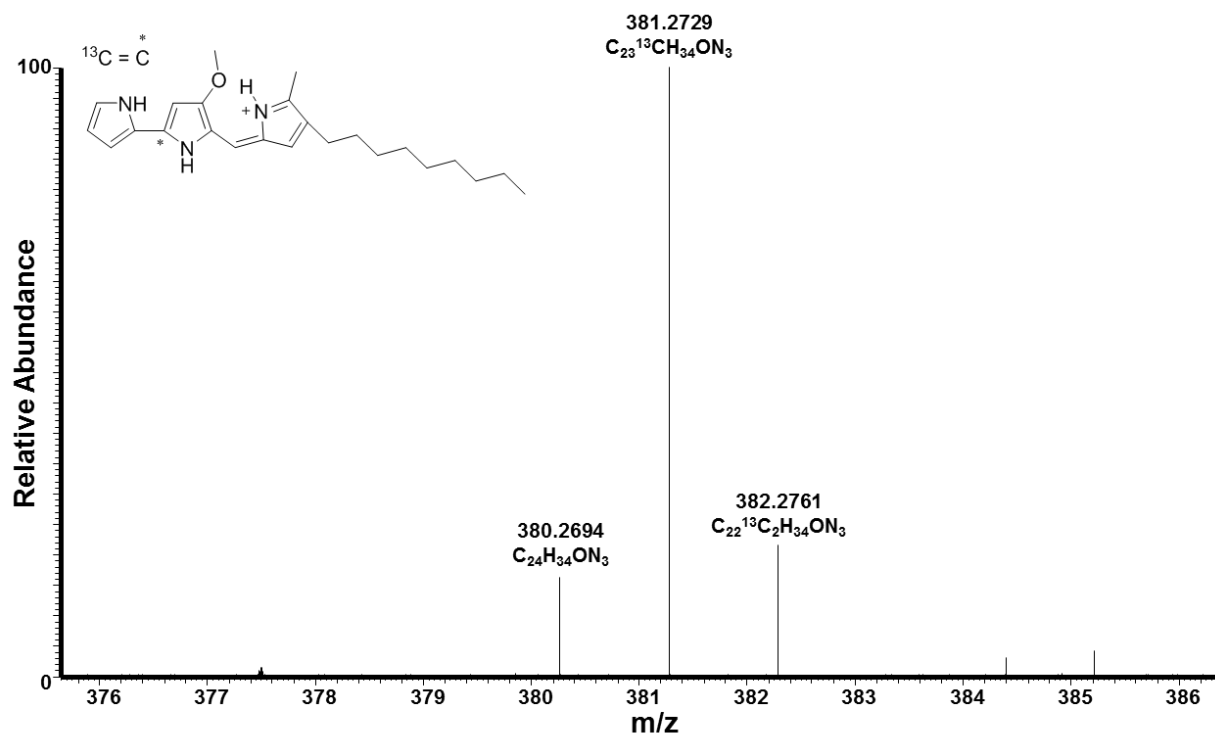

**Fig. S117.** HRMS<sup>2</sup> of 2-methyl-3-propyl prodiginine with incorporated <sup>15</sup>N derived from <sup>15</sup>NH<sub>4</sub>Cl (compound **1** [M+H]<sup>+</sup>: *m/z* 297, C<sub>18</sub>H<sub>22</sub>N<sub>2</sub><sup>15</sup>NO).

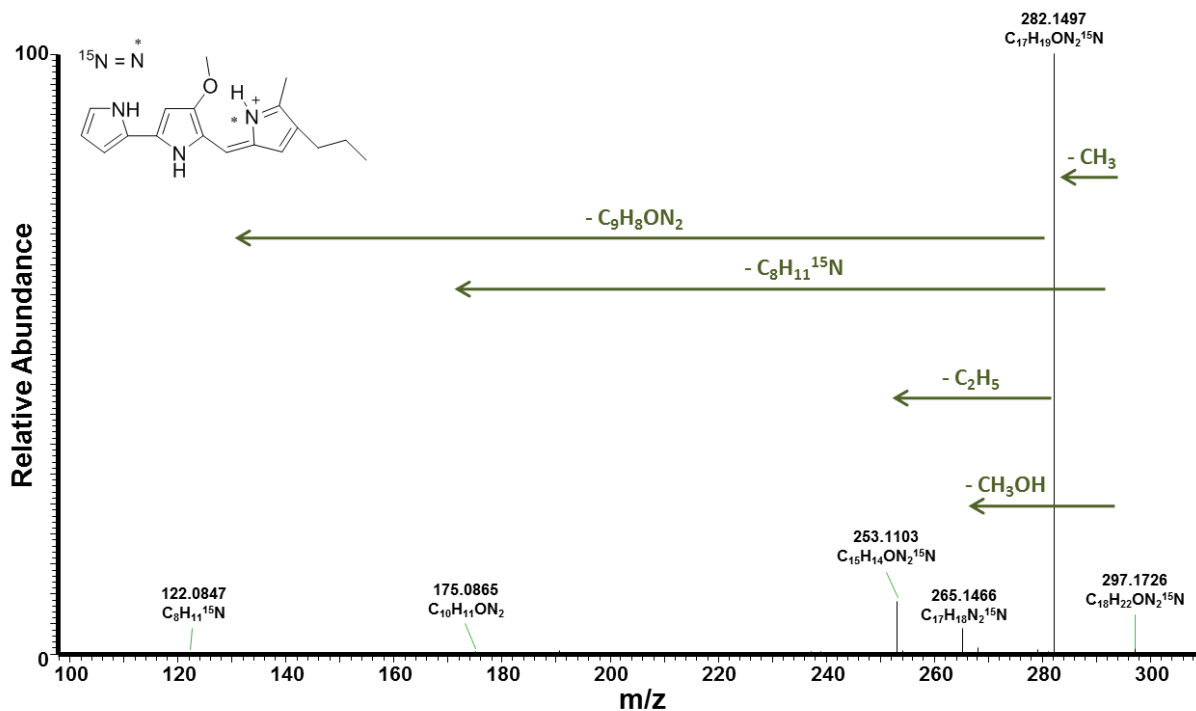

**Fig. S118.** HRMS<sup>2</sup> of 2-methyl-3-butyl prodiginine with incorporated <sup>15</sup>N derived from <sup>15</sup>NH<sub>4</sub>Cl (compound **2** [M+H]<sup>+</sup>: *m/z* 311, C<sub>19</sub>H<sub>24</sub>N<sub>2</sub><sup>15</sup>NO).

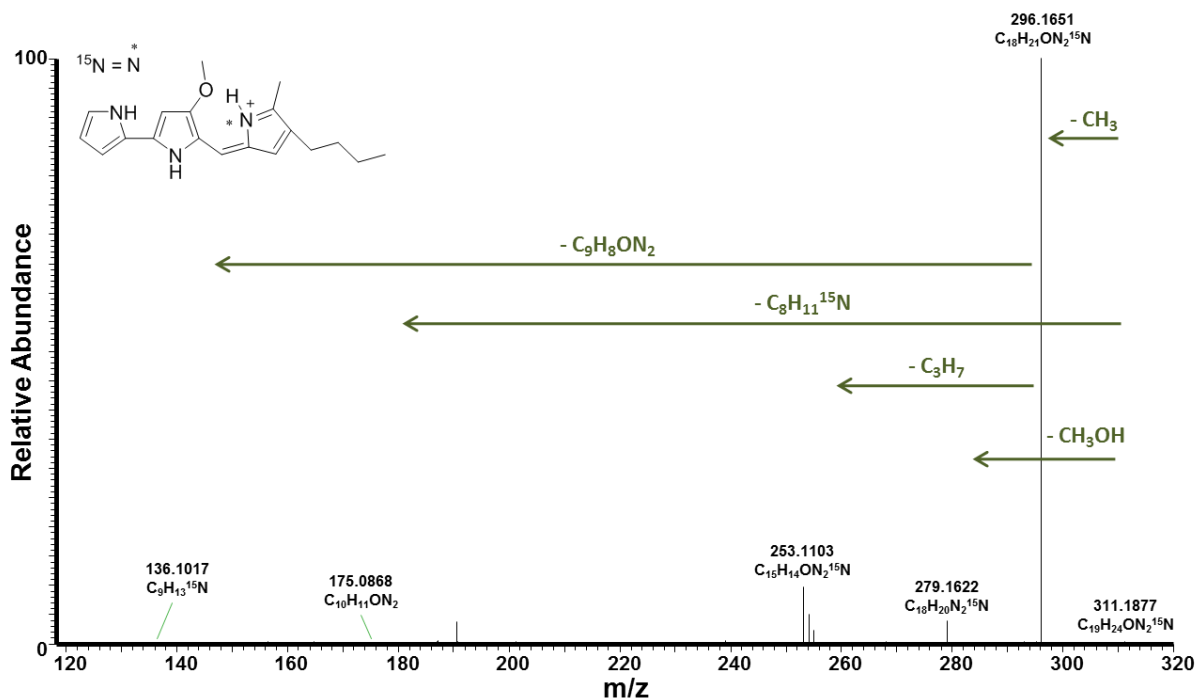

**Fig. S119.** HRMS<sup>2</sup> of prodigiosin with incorporated <sup>15</sup>N derived from <sup>15</sup>NH<sub>4</sub>Cl (compound **3** [M+H]<sup>+</sup>: *m/z* 325, C<sub>20</sub>H<sub>26</sub>N<sub>2</sub><sup>15</sup>NO).

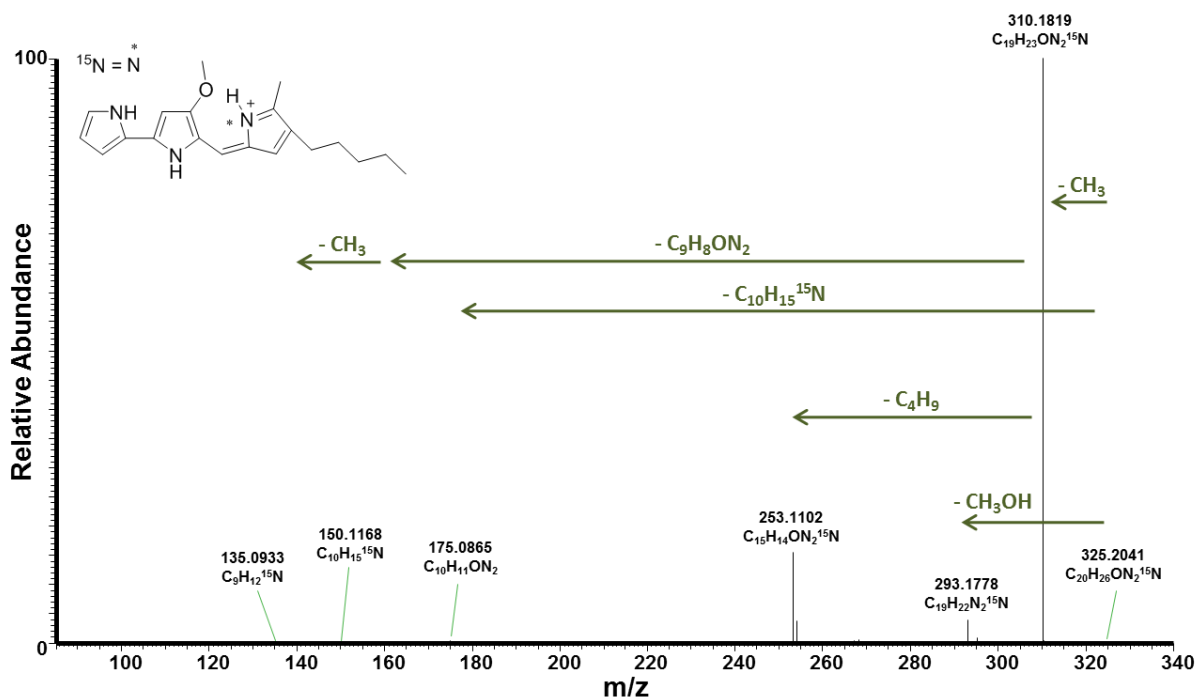

**Fig. S120.** HRMS<sup>2</sup> of 2-methyl-3-hexyl prodiginine with incorporated <sup>15</sup>N derived from <sup>15</sup>NH<sub>4</sub>Cl (compound **4** [M+H]<sup>+</sup>: *m/z* 339, C<sub>21</sub>H<sub>28</sub>N<sub>2</sub><sup>15</sup>NO).

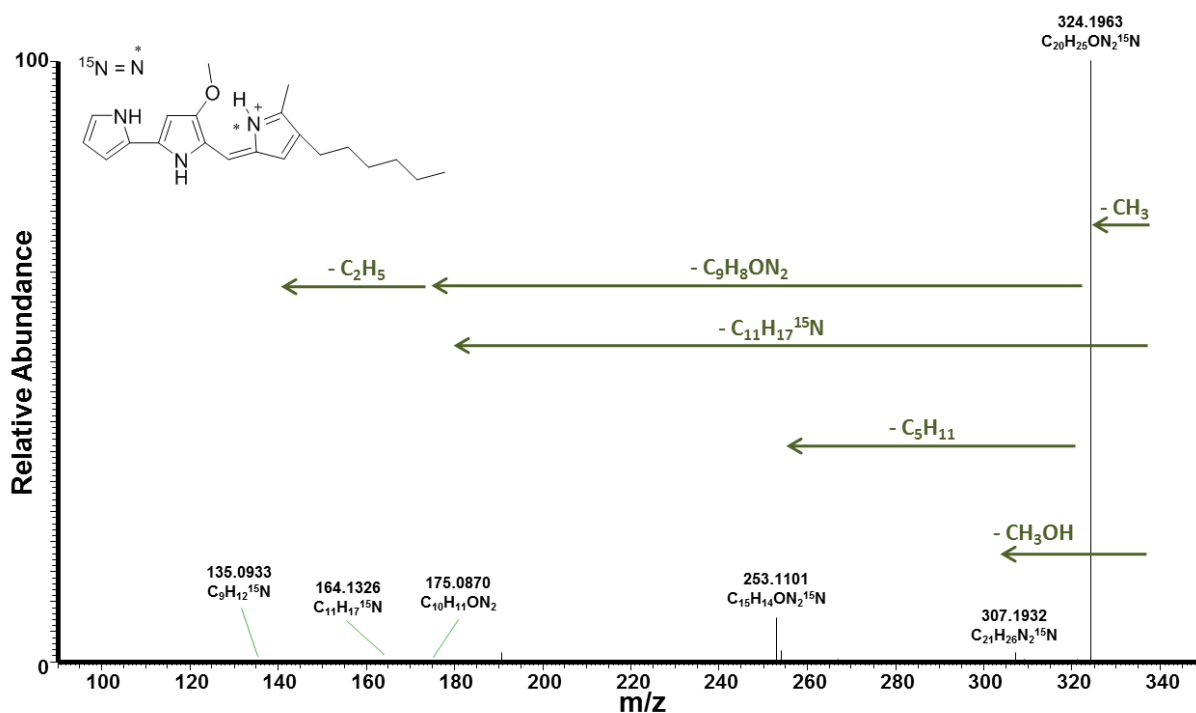

**Fig. S121.** HRMS<sup>2</sup> of 2-methyl-3-heptyl prodiginine with incorporated <sup>15</sup>N derived from <sup>15</sup>NH<sub>4</sub>Cl (compound **5** [M+H]<sup>+</sup>: *m/z* 353, C<sub>22</sub>H<sub>30</sub>N<sub>2</sub><sup>15</sup>NO).

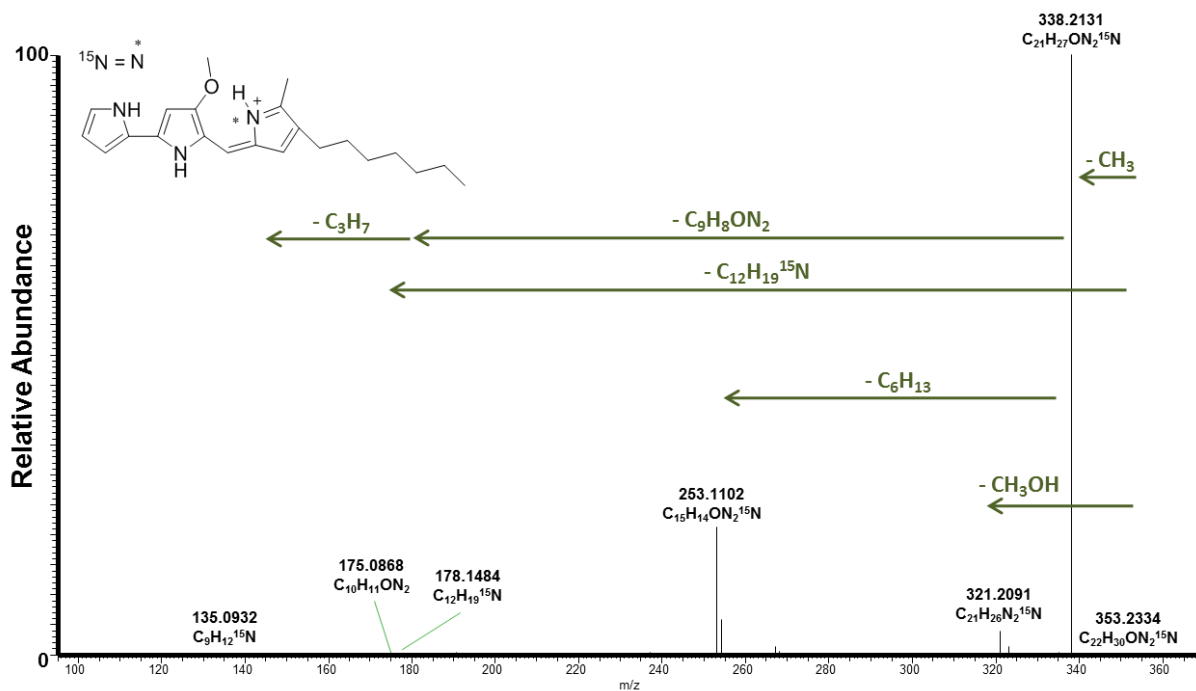

**Fig. S122.** HRMS<sup>2</sup> of 2-methyl-3-nonyl prodiginine with incorporated <sup>15</sup>N derived from <sup>15</sup>NH<sub>4</sub>Cl (compound **7** [M+H]<sup>+</sup>: *m/z* 381, C<sub>24</sub>H<sub>34</sub>N<sub>2</sub><sup>15</sup>NO).

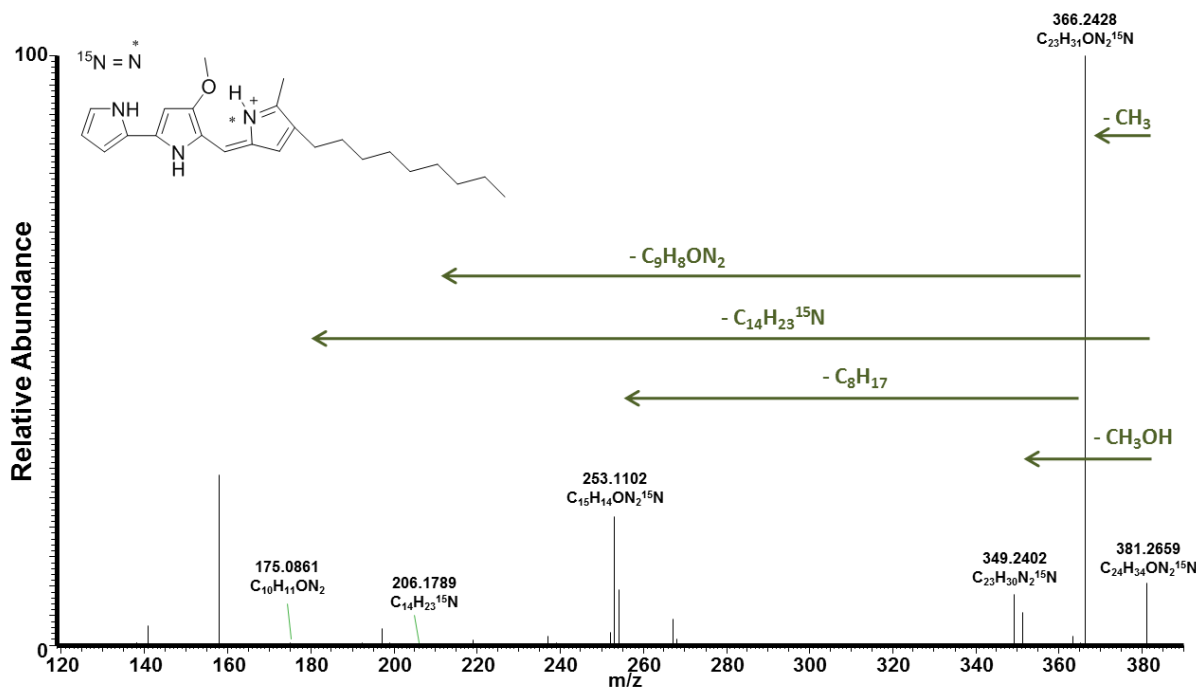

**Fig. S123.** HRMS<sup>3</sup> of 2-methyl-3-propyl prodiginine with incorporated <sup>15</sup>N derived from <sup>15</sup>NH<sub>4</sub>Cl (compound **1** [M+H]<sup>+</sup>: *m/z* 297 via 272, C<sub>18</sub>H<sub>22</sub>N<sub>2</sub><sup>15</sup>NO).

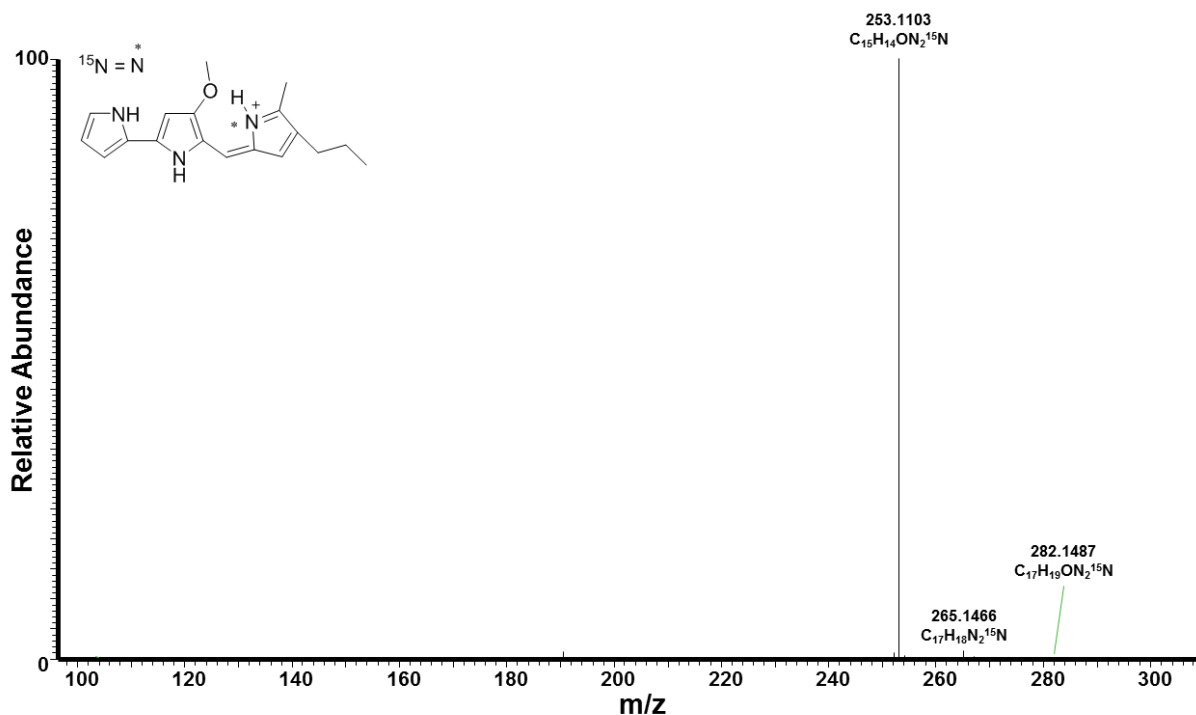

**Fig. S124.** HRMS<sup>3</sup> of 2-methyl-3-butyl prodiginine with incorporated <sup>15</sup>N derived from <sup>15</sup>NH<sub>4</sub>Cl (compound **2** [M+H]<sup>+</sup>: *m/z* 311 via 296, C<sub>19</sub>H<sub>24</sub>N<sub>2</sub><sup>15</sup>NO).

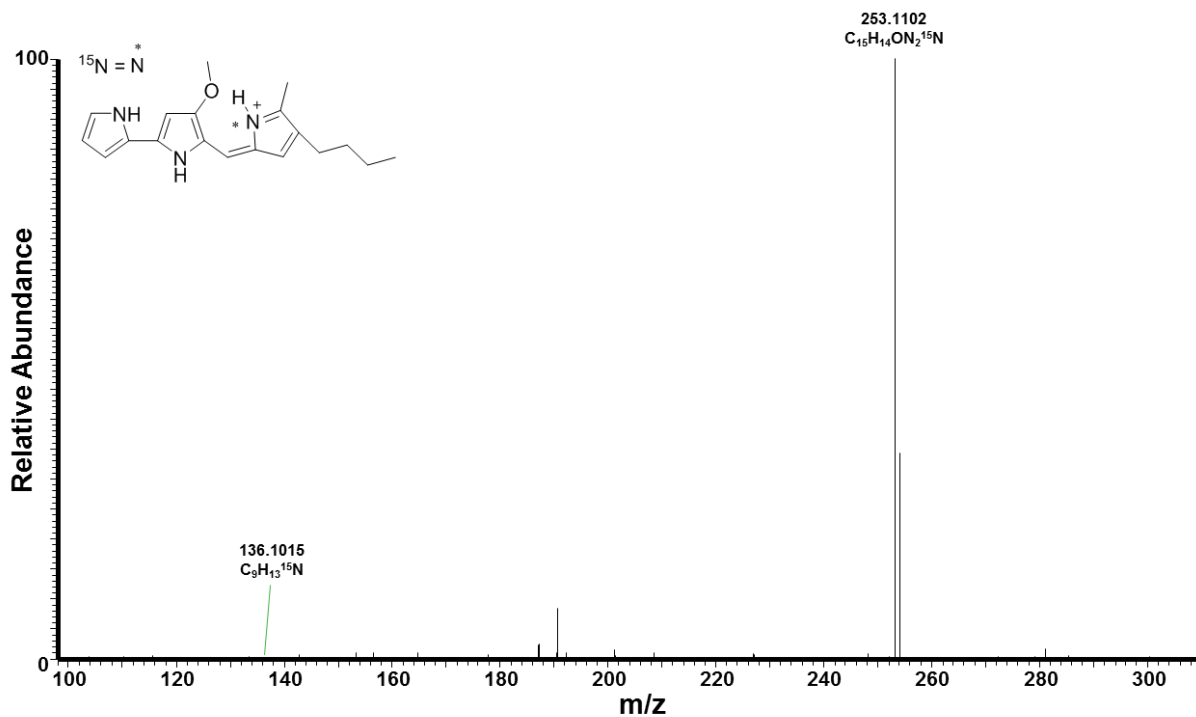



**Fig. S125.** HRMS<sup>3</sup> of prodigiosin with incorporated <sup>15</sup>N derived from <sup>15</sup>NH<sub>4</sub>Cl (compound **3** [M+H]<sup>+</sup>: *m/z* 325 via 310, C<sub>20</sub>H<sub>26</sub>N<sub>2</sub><sup>15</sup>NO).

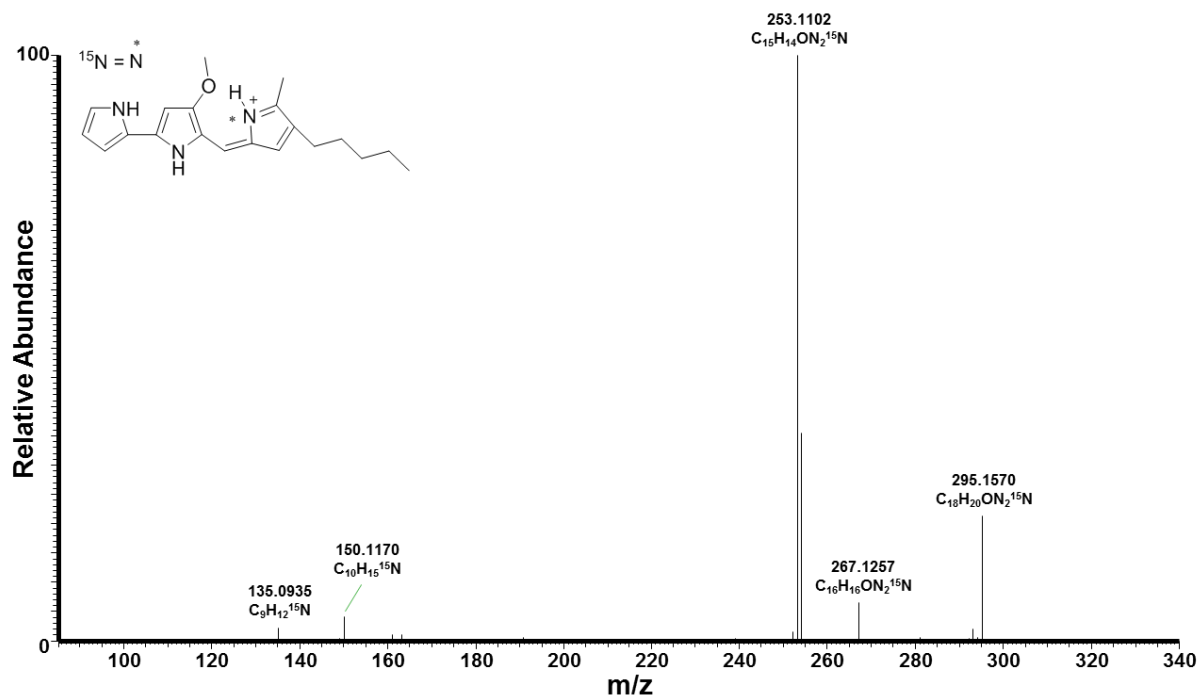

**Fig. S126.** HRMS<sup>3</sup> of 2-methyl-3-hexyl prodiginine with incorporated <sup>15</sup>N derived from <sup>15</sup>NH<sub>4</sub>Cl (compound **4** [M+H]<sup>+</sup>: *m/z* 339 via 324, C<sub>21</sub>H<sub>28</sub>N<sub>2</sub><sup>15</sup>NO).

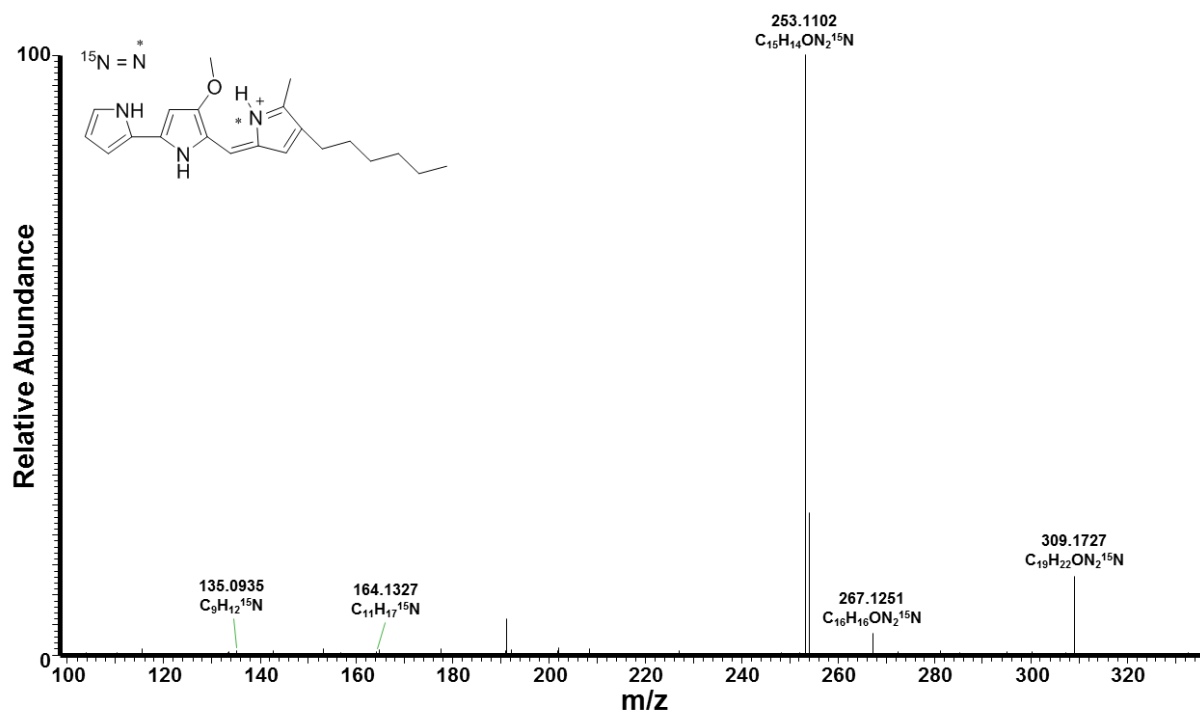

**Fig. S127.** HRMS<sup>3</sup> of 2-methyl-3-heptyl prodiginine with incorporated <sup>15</sup>N derived from <sup>15</sup>NH<sub>4</sub>Cl (compound **5** [M+H]<sup>+</sup>: *m/z* 353 via 338, C<sub>22</sub>H<sub>30</sub>N<sub>2</sub><sup>15</sup>NO).

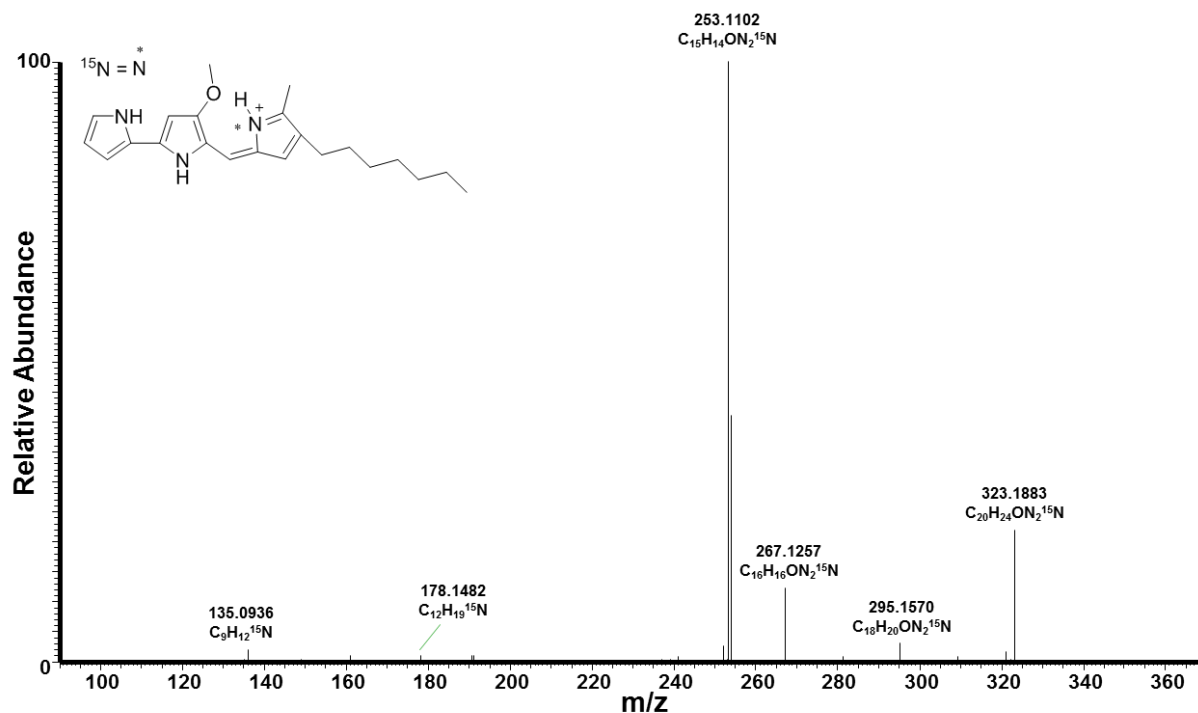

**Fig. S128.** HRMS<sup>3</sup> of 2-methyl-3-nonyl prodiginine with incorporated <sup>15</sup>N derived from <sup>15</sup>NH<sub>4</sub>Cl (compound **7** [M+H]<sup>+</sup>: *m/z* 381 via 366, C<sub>24</sub>H<sub>34</sub>N<sub>2</sub><sup>15</sup>NO).

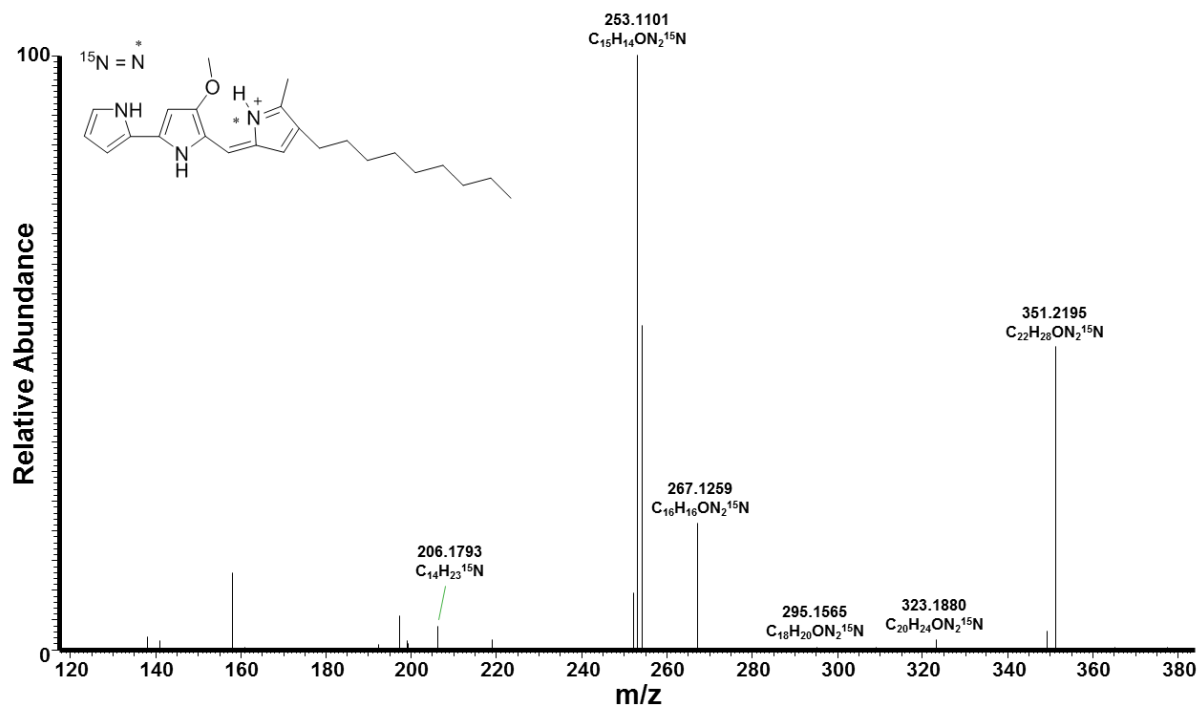

**Fig. S129.** Proposed mass spectral fragmentation pathway of 2-methyl-3-propyl prodiginine with incorporated  $^{15}\text{N}$  derived from  $^{15}\text{NH}_4\text{Cl}$  (compound **1**  $[\text{M}+\text{H}]^+$ :  $m/z$  297,  $\text{C}_{18}\text{H}_{22}\text{N}_2^{15}\text{NO}$ ).

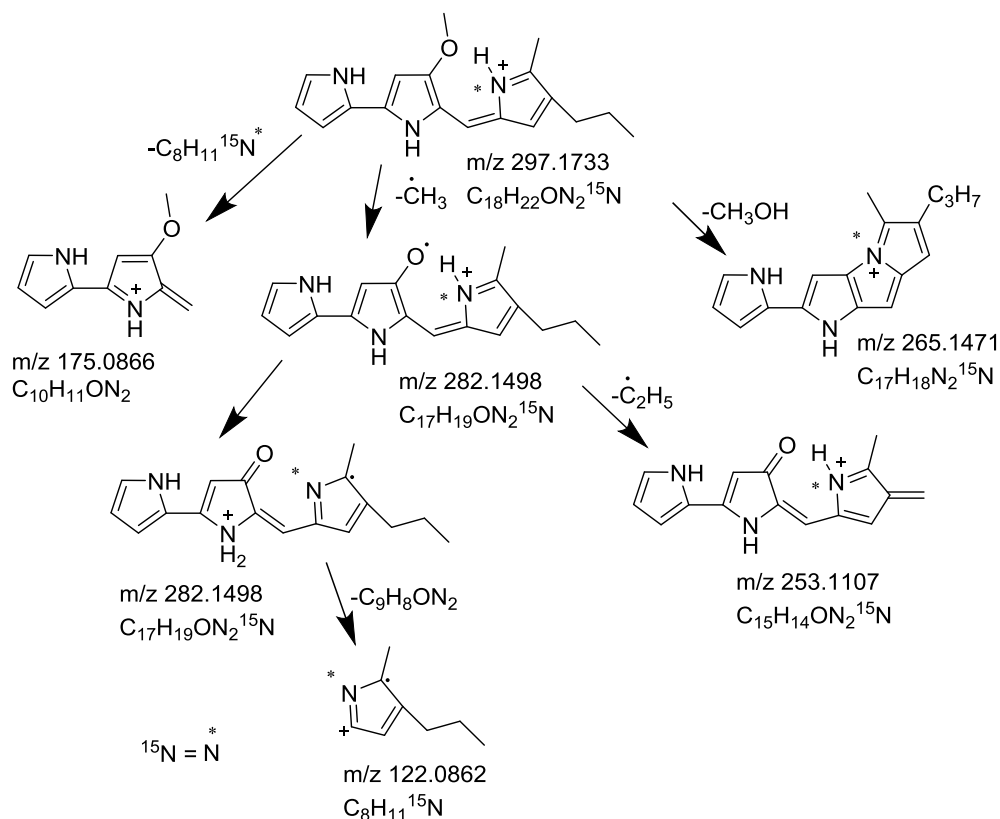

**Fig. S130.** Proposed mass spectral fragmentation pathway of 2-methyl-3-butyl prodiginine with incorporated  $^{15}\text{N}$  derived from  $^{15}\text{NH}_4\text{Cl}$  (compound **2**  $[\text{M}+\text{H}]^+$ :  $m/z$  311,  $\text{C}_{19}\text{H}_{24}\text{N}_2^{15}\text{NO}$ ).

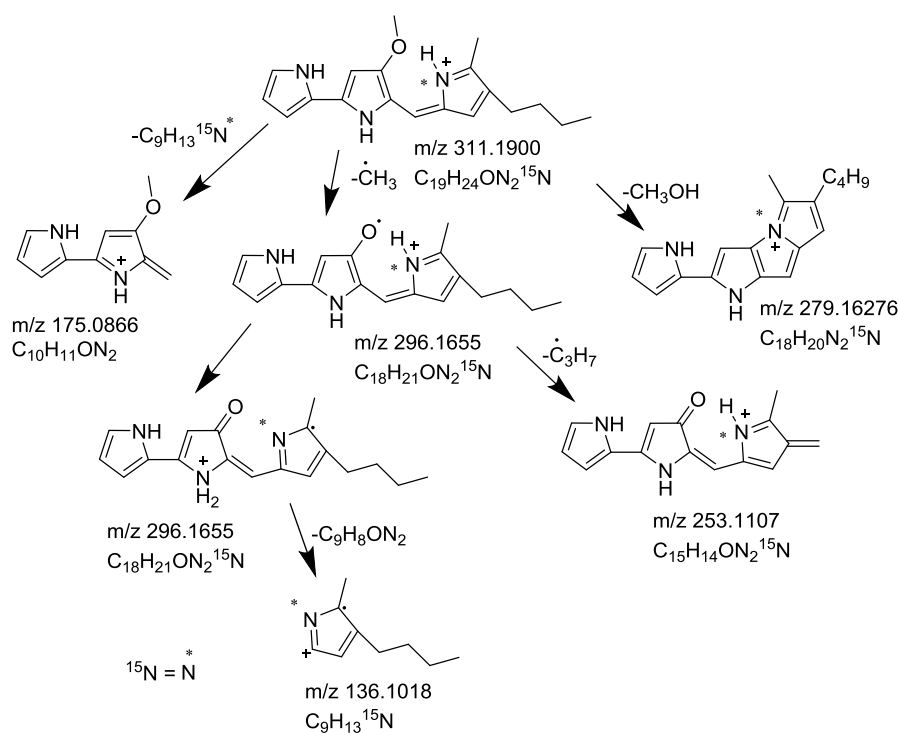

**Fig. S131.** Proposed mass spectral fragmentation pathway of prodigiosin with incorporated  $^{15}\text{N}$  derived from  $^{15}\text{NH}_4\text{Cl}$  (compound **3**  $[\text{M}+\text{H}]^+$ :  $m/z$  325,  $\text{C}_{20}\text{H}_{26}\text{N}_2^{15}\text{NO}$ ).

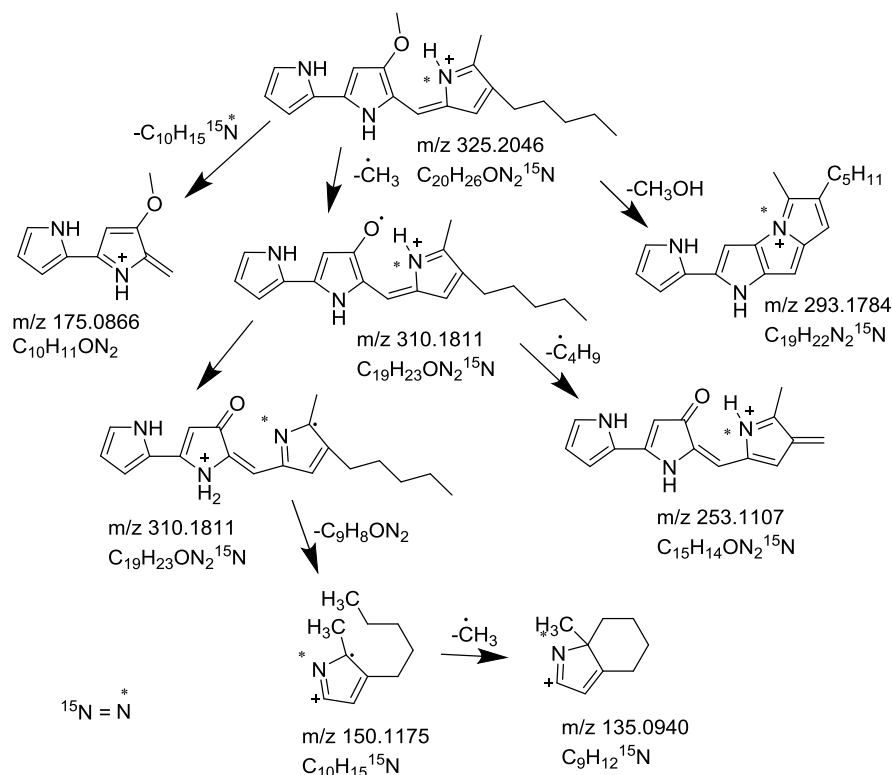

**Fig. S132.** Proposed mass spectral fragmentation pathway of 2-methyl-3-hexyl prodiginine with incorporated  $^{15}\text{N}$  derived from  $^{15}\text{NH}_4\text{Cl}$  (compound **4**  $[\text{M}+\text{H}]^+$ :  $m/z$  339,  $\text{C}_{21}\text{H}_{28}\text{N}_2^{15}\text{NO}$ ).

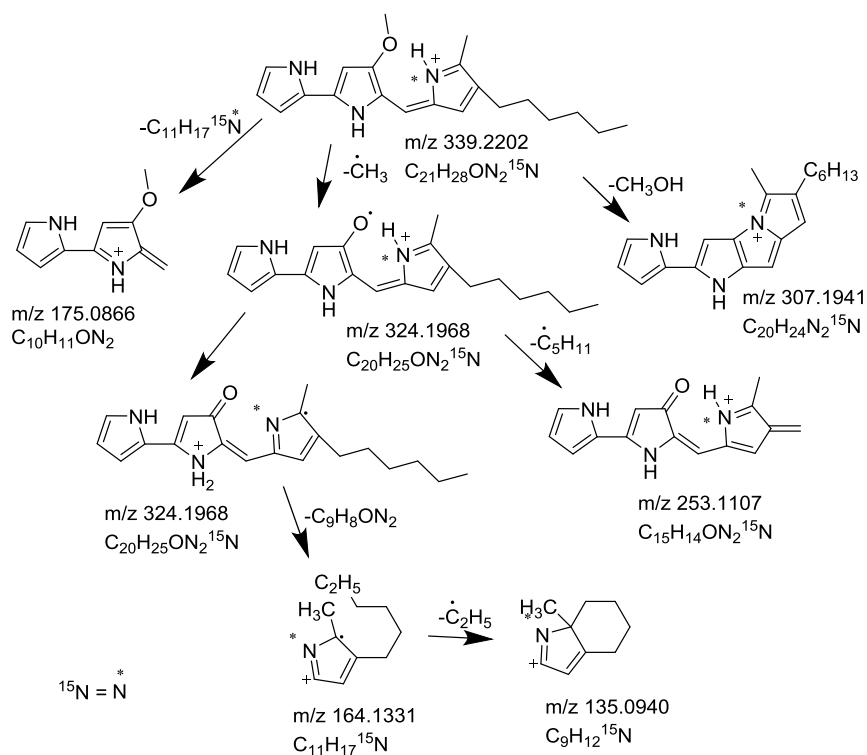

**Fig. S133.** Proposed mass spectral fragmentation pathway of 2-methyl-3-heptyl prodiginine with incorporated  $^{15}\text{N}$  derived from  $^{15}\text{NH}_4\text{Cl}$  (compound **5**  $[\text{M}+\text{H}]^+$ :  $m/z$  353,  $\text{C}_{22}\text{H}_{30}\text{N}_2^{15}\text{NO}$ ).

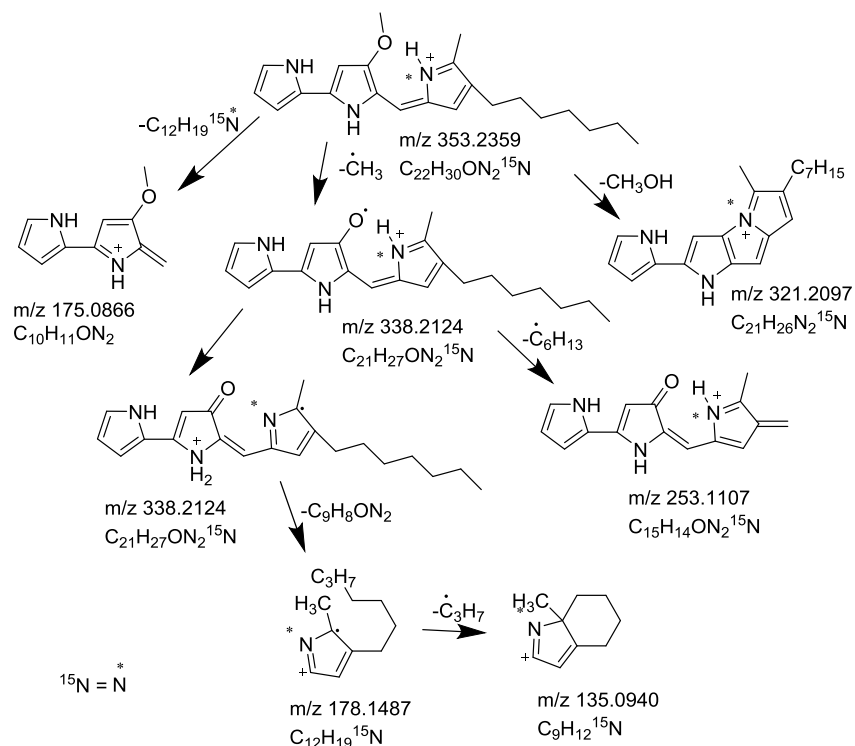

**Fig. S134.** Proposed mass spectral fragmentation pathway of 2-methyl-3-nonyl prodiginine with incorporated  $^{15}\text{N}$  derived from  $^{15}\text{NH}_4\text{Cl}$  (compound **7**  $[\text{M}+\text{H}]^+$ :  $m/z$  381 via 366,  $\text{C}_{24}\text{H}_{34}\text{N}_2^{15}\text{NO}$ ).

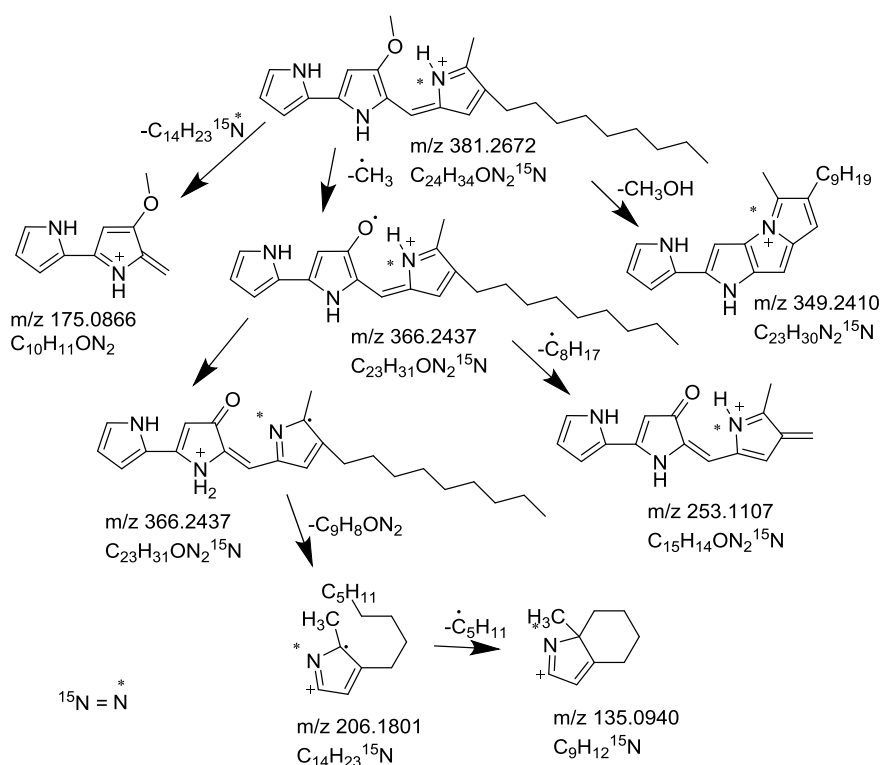

**Fig. S135.** HRMS<sup>2</sup> of 2-methyl-3-propyl prodiginine with incorporated methyl-D<sub>3</sub> group derived from [methyl-D<sub>3</sub>]-L-methionine (compound **1** [M+H]<sup>+</sup>: *m/z* 299, C<sub>18</sub>H<sub>19</sub>D<sub>3</sub>N<sub>3</sub>O).

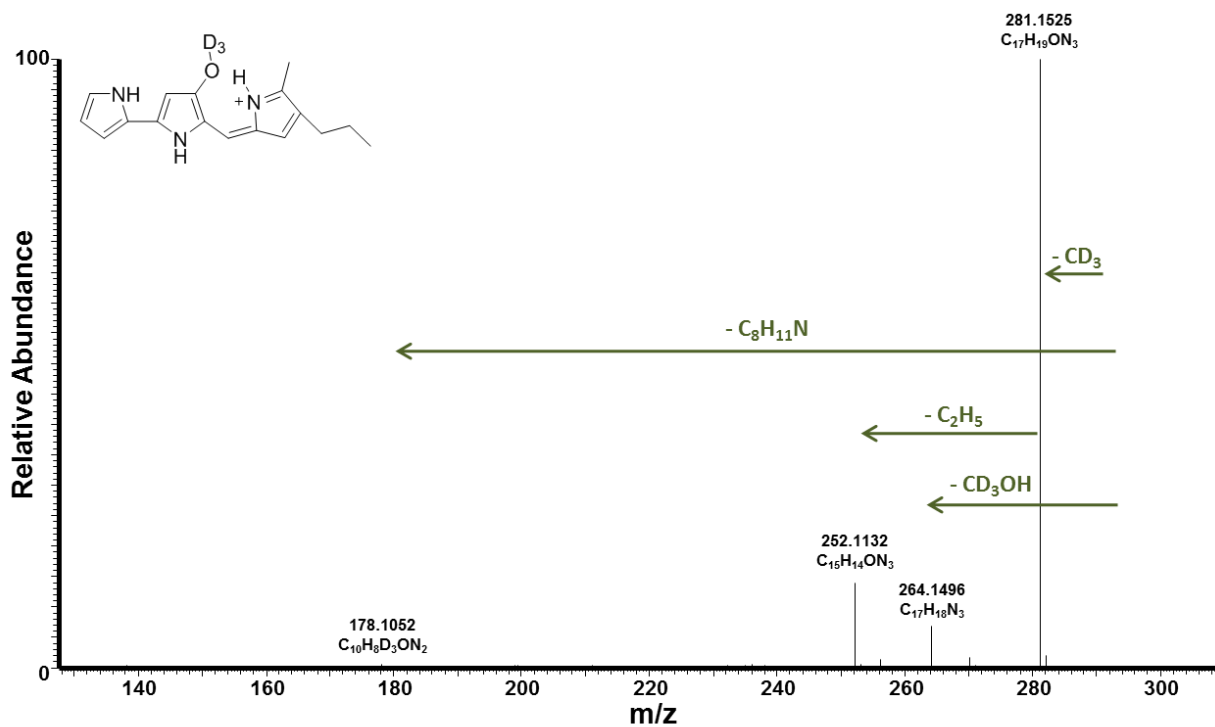

**Fig. S136.** HRMS<sup>2</sup> of 2-methyl-3-butyl prodiginine with incorporated methyl-D<sub>3</sub> group derived from [methyl-D<sub>3</sub>]-L-methionine (compound **2** [M+H]<sup>+</sup>: *m/z* 313, C<sub>19</sub>H<sub>21</sub>D<sub>3</sub>N<sub>3</sub>O).

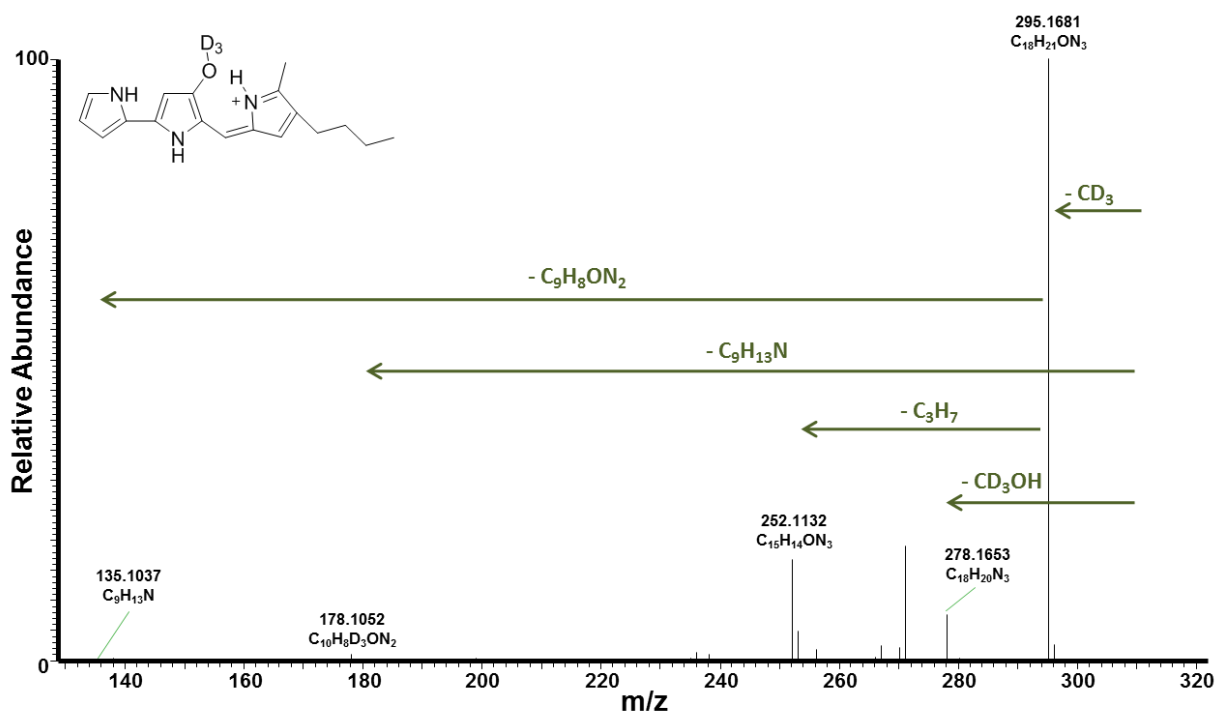

**Fig. S137.** HRMS<sup>2</sup> of prodigiosin with incorporated methyl-D<sub>3</sub> group derived from [methyl-D<sub>3</sub>]-L-methionine (compound **3** [M+H]<sup>+</sup>: *m/z* 327, C<sub>20</sub>H<sub>23</sub>D<sub>3</sub>N<sub>3</sub>O).

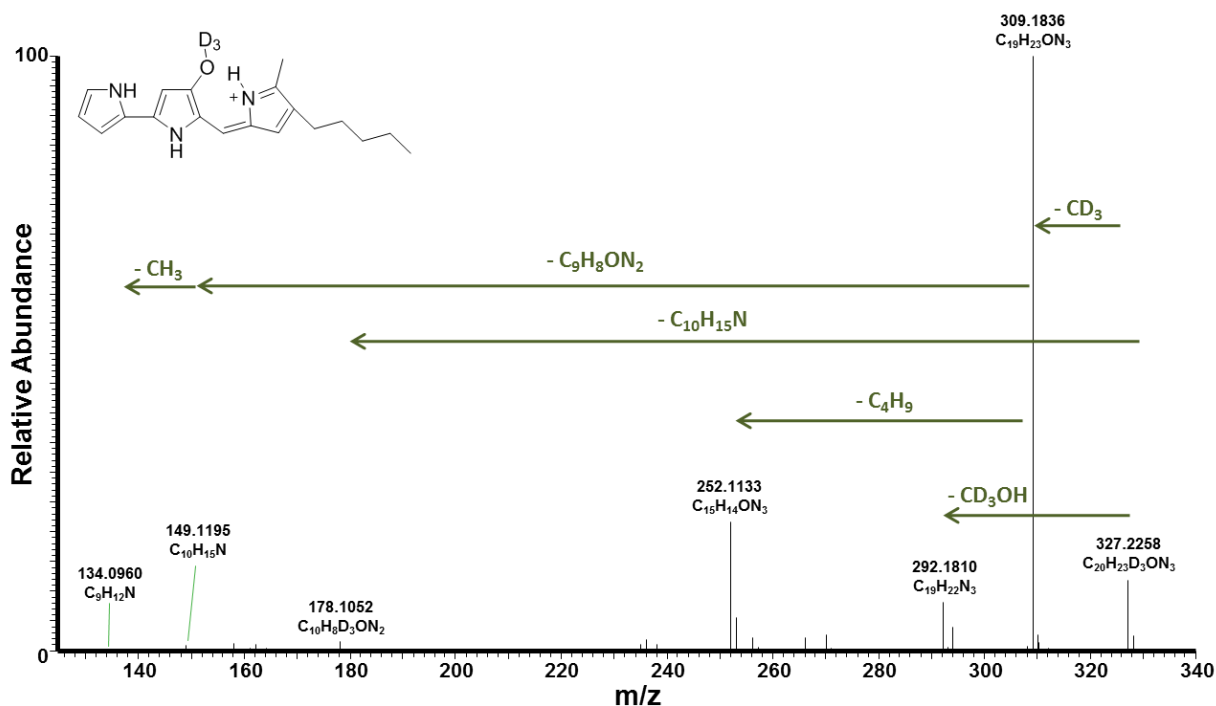

**Fig. S138.** HRMS<sup>2</sup> of 2-methyl-3-hexyl prodiginine with incorporated methyl-D<sub>3</sub> group derived from [methyl-D<sub>3</sub>]-L-methionine (compound **4** [M+H]<sup>+</sup>: *m/z* 341, C<sub>21</sub>H<sub>25</sub>D<sub>3</sub>N<sub>3</sub>O).

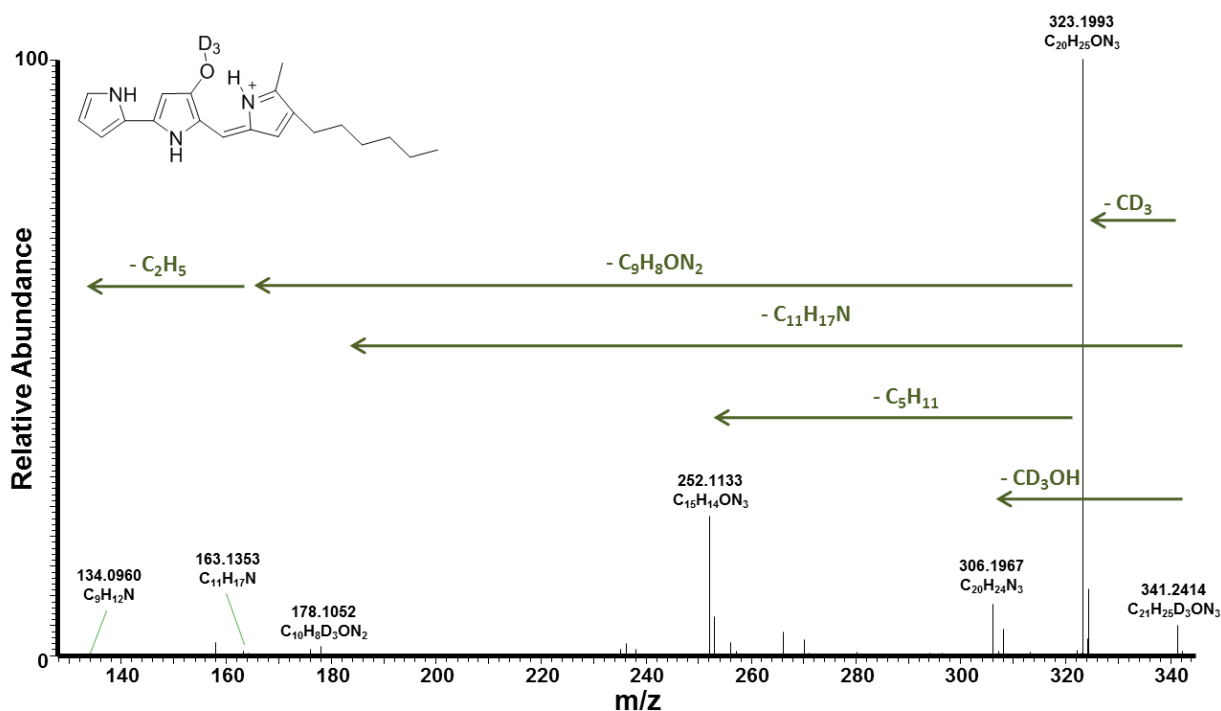

**Fig. S139.** HRMS<sup>2</sup> of 2-methyl-3-heptyl prodiginine with incorporated methyl-D<sub>3</sub> group derived from [methyl-D<sub>3</sub>]-L-methionine (compound **5** [M+H]<sup>+</sup>: *m/z* 355, C<sub>22</sub>H<sub>27</sub>D<sub>3</sub>N<sub>3</sub>O).

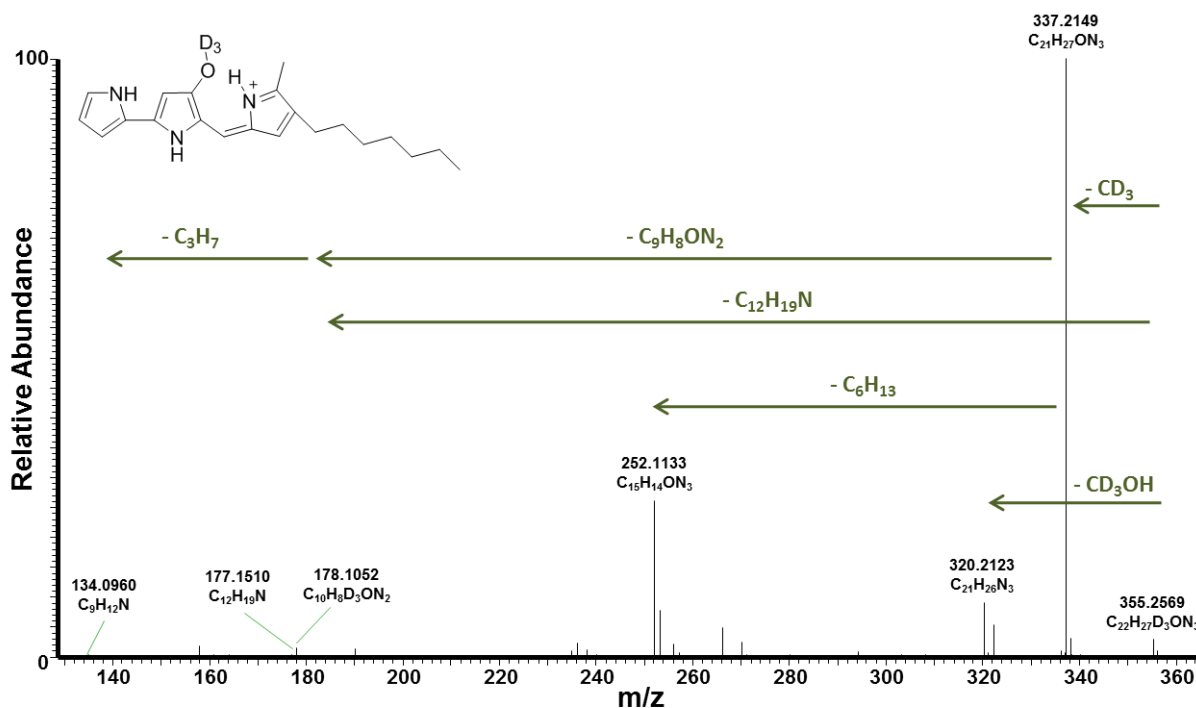

**Fig. S140.** HRMS<sup>2</sup> of 2-methyl-3-nonyl prodiginine with incorporated methyl-D<sub>3</sub> group derived from [methyl-D<sub>3</sub>]-L-methionine (compound **7** [M+H]<sup>+</sup>: *m/z* 383, C<sub>24</sub>H<sub>31</sub>D<sub>3</sub>N<sub>3</sub>O).

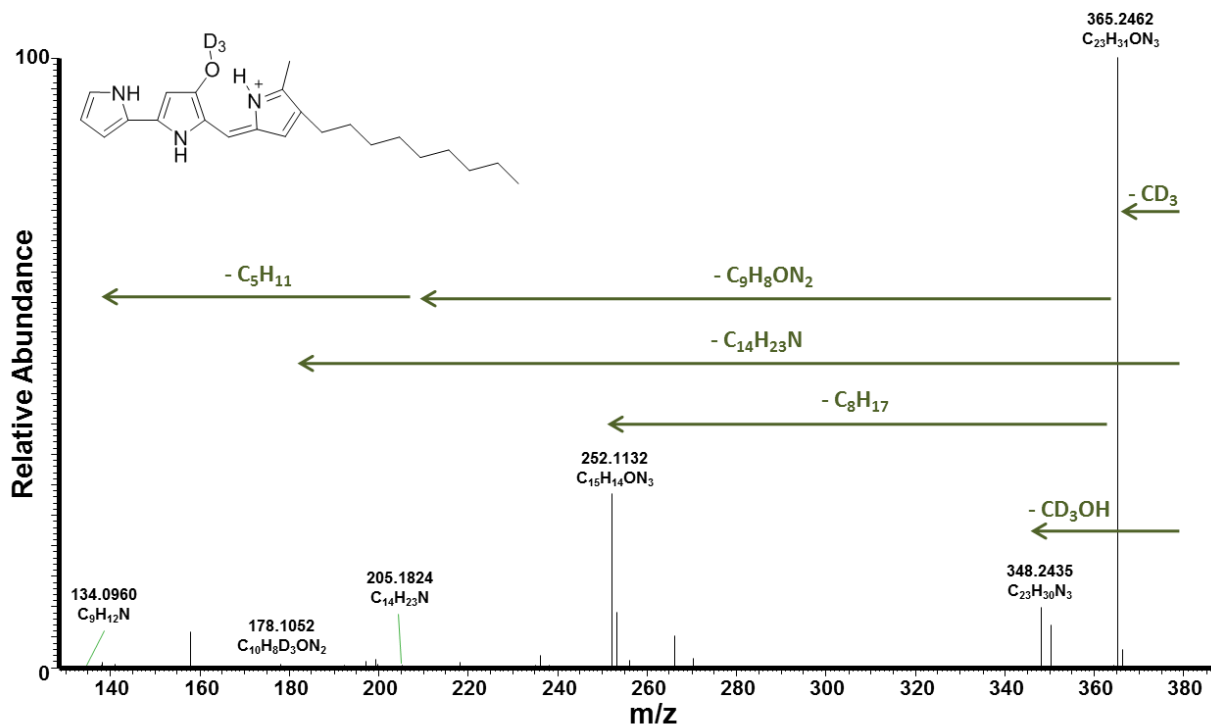



**Fig. S141.** HRMS<sup>3</sup> of 2-methyl-3-propyl prodiginine with incorporated methyl-D<sub>3</sub> group derived from [methyl-D<sub>3</sub>]-L-methionine (compound **1** [M+H]<sup>+</sup>: *m/z* 299 via 281, C<sub>18</sub>H<sub>19</sub>D<sub>3</sub>N<sub>3</sub>O).

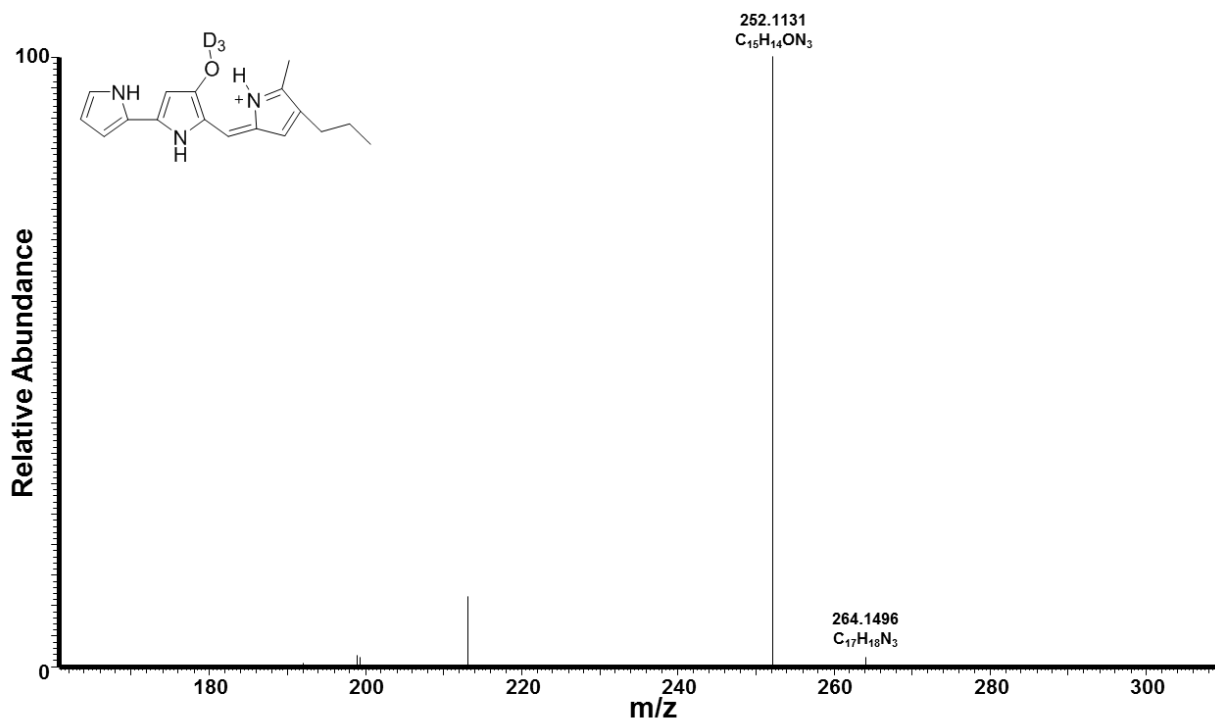

**Fig. S142.** HRMS<sup>3</sup> of 2-methyl-3-butyl prodiginine with incorporated methyl-D<sub>3</sub> group derived from [methyl-D<sub>3</sub>]-L-methionine (compound **2** [M+H]<sup>+</sup>: *m/z* 313 via 295, C<sub>19</sub>H<sub>21</sub>D<sub>3</sub>N<sub>3</sub>O).

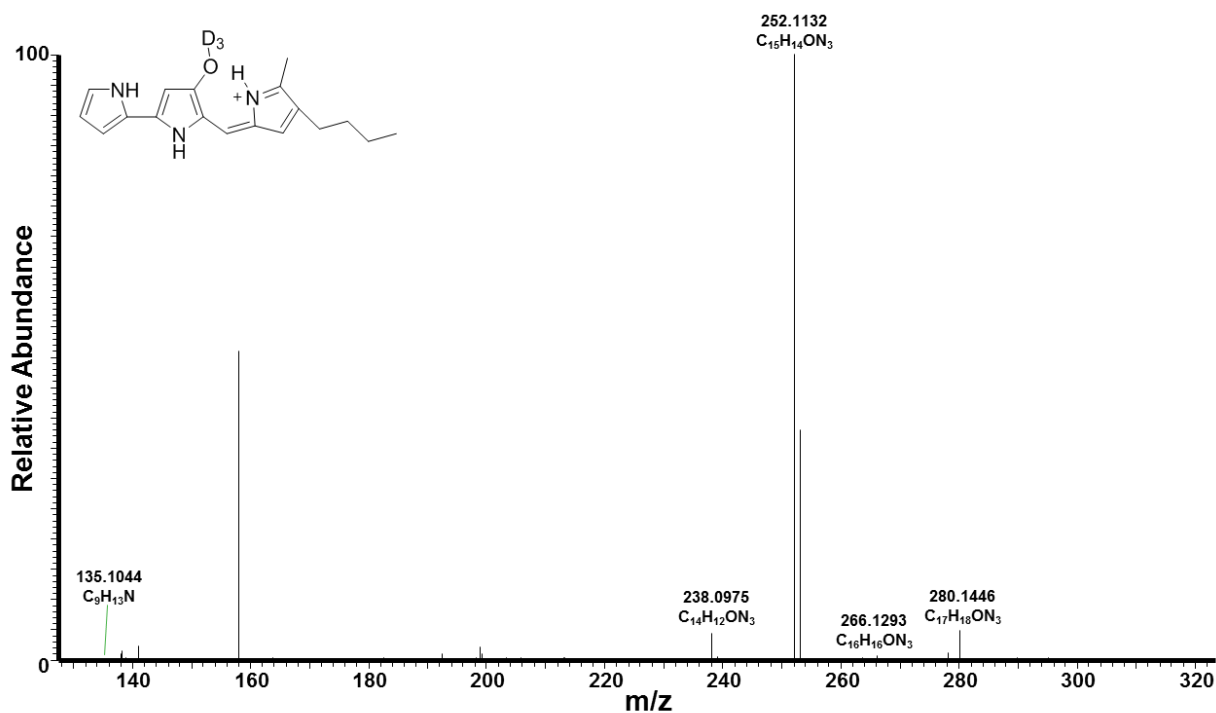

**Fig. S143.** HRMS<sup>3</sup> of prodigiosin with incorporated methyl-D<sub>3</sub> group derived from [methyl-D<sub>3</sub>]-L-methionine (compound **3** [M+H]<sup>+</sup>: *m/z* 327 via 309, C<sub>20</sub>H<sub>23</sub>D<sub>3</sub>N<sub>3</sub>O).

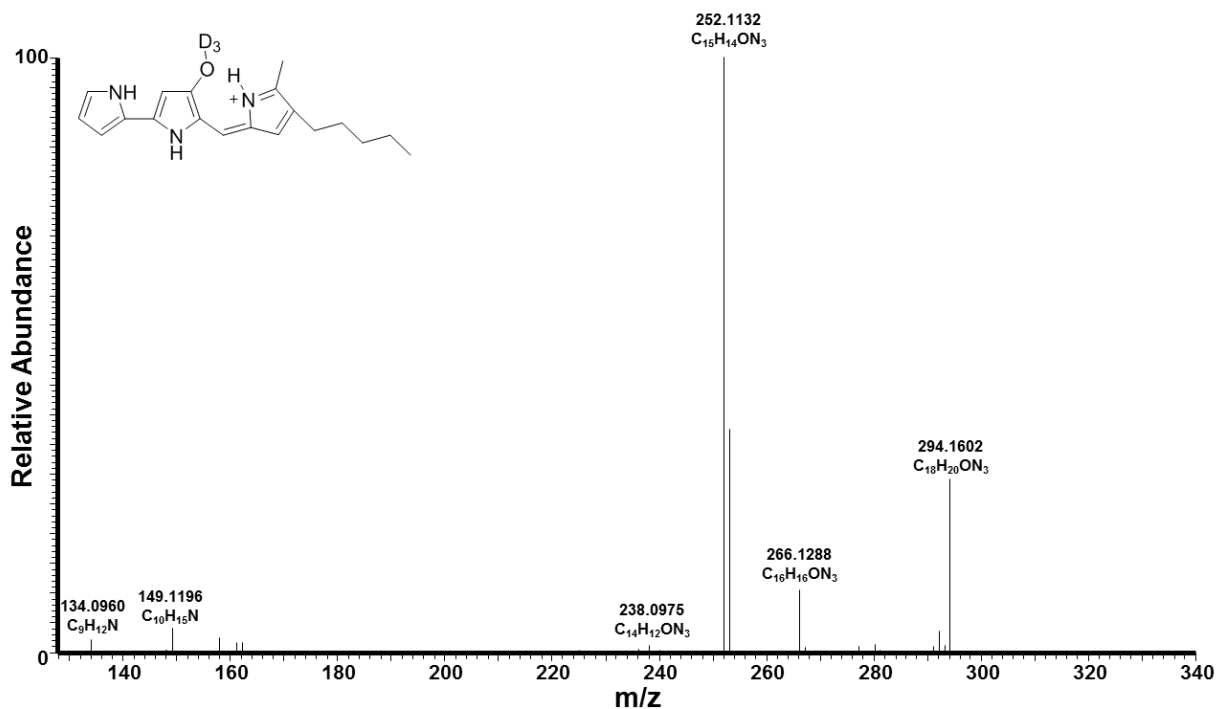

**Fig. S144.** HRMS<sup>3</sup> of 2-methyl-3-hexyl prodiginine with incorporated methyl-D<sub>3</sub> group derived from [methyl-D<sub>3</sub>]-L-methionine (compound **4** [M+H]<sup>+</sup>: *m/z* 341 via 323, C<sub>21</sub>H<sub>25</sub>D<sub>3</sub>N<sub>3</sub>O).

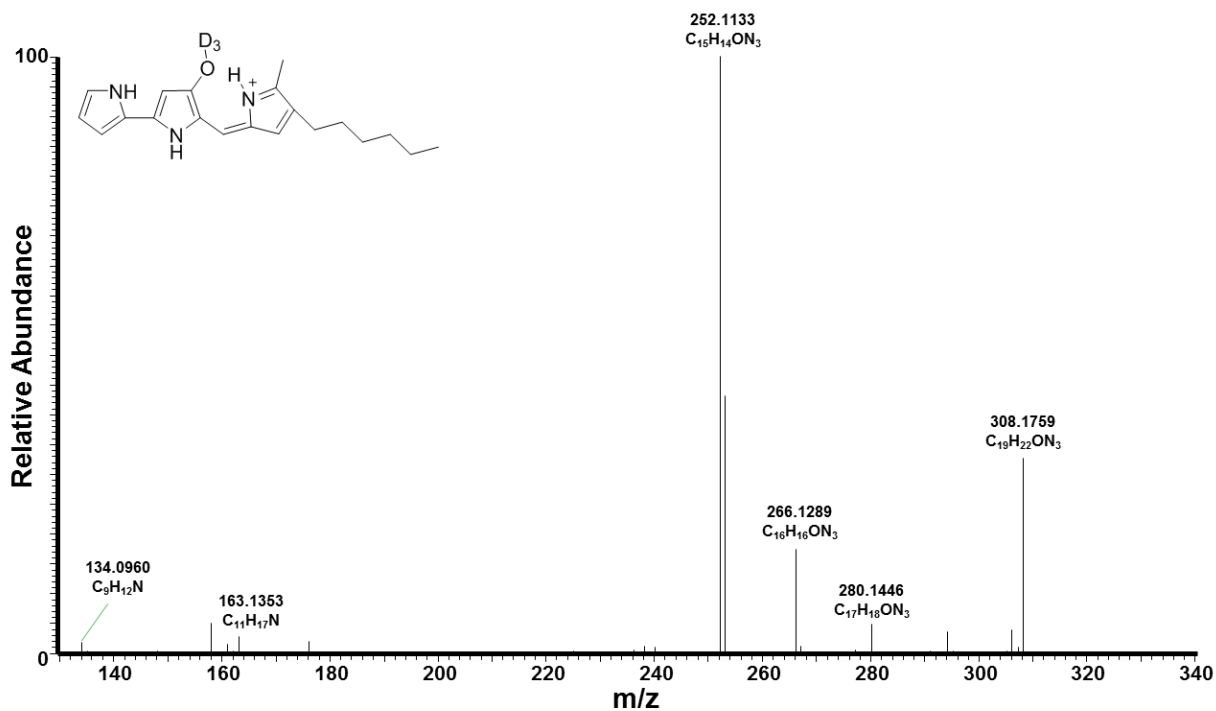

**Fig. S145.** HRMS<sup>3</sup> of 2-methyl-3-heptyl prodiginine with incorporated methyl-D<sub>3</sub> group derived from [methyl-D<sub>3</sub>]-L-methionine (compound **5** [M+H]<sup>+</sup>: *m/z* 355 via 337, C<sub>22</sub>H<sub>27</sub>D<sub>3</sub>N<sub>3</sub>O).

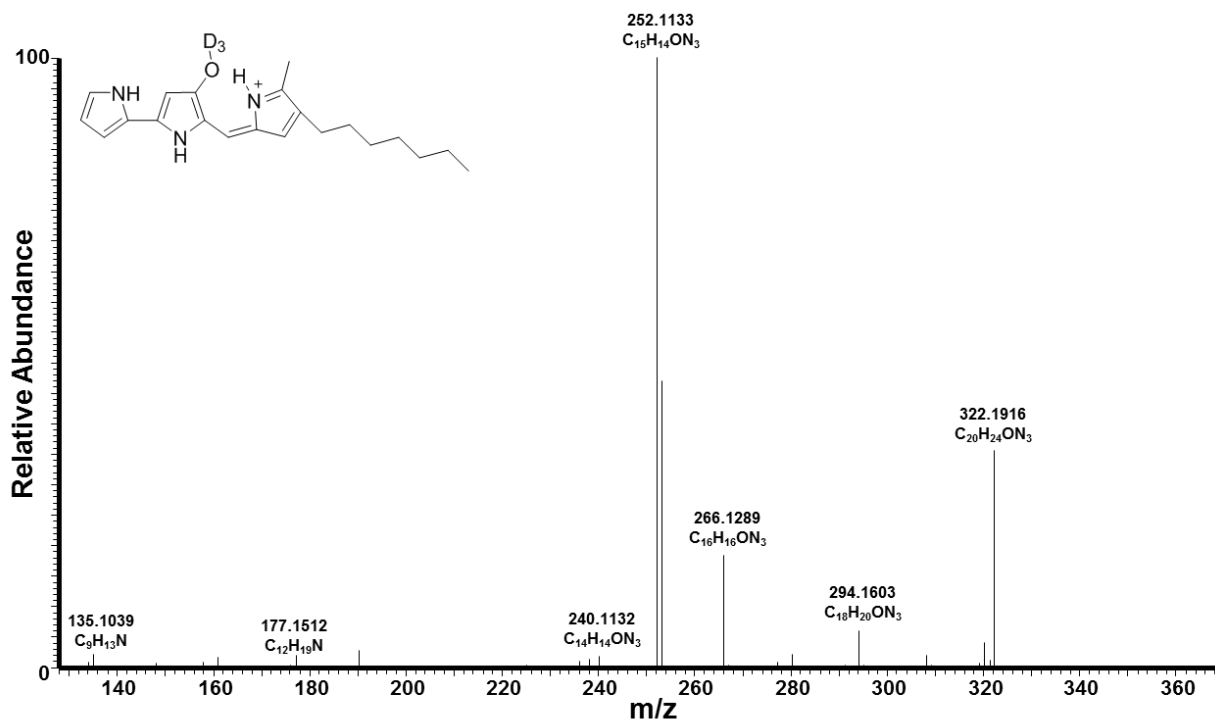

**Fig. S146.** HRMS<sup>3</sup> of 2-methyl-3-nonyl prodiginine with incorporated methyl-D<sub>3</sub> group derived from [methyl-D<sub>3</sub>]-L-methionine (compound **7** [M+H]<sup>+</sup>: *m/z* 383 via 366, C<sub>24</sub>H<sub>31</sub>D<sub>3</sub>N<sub>3</sub>O).

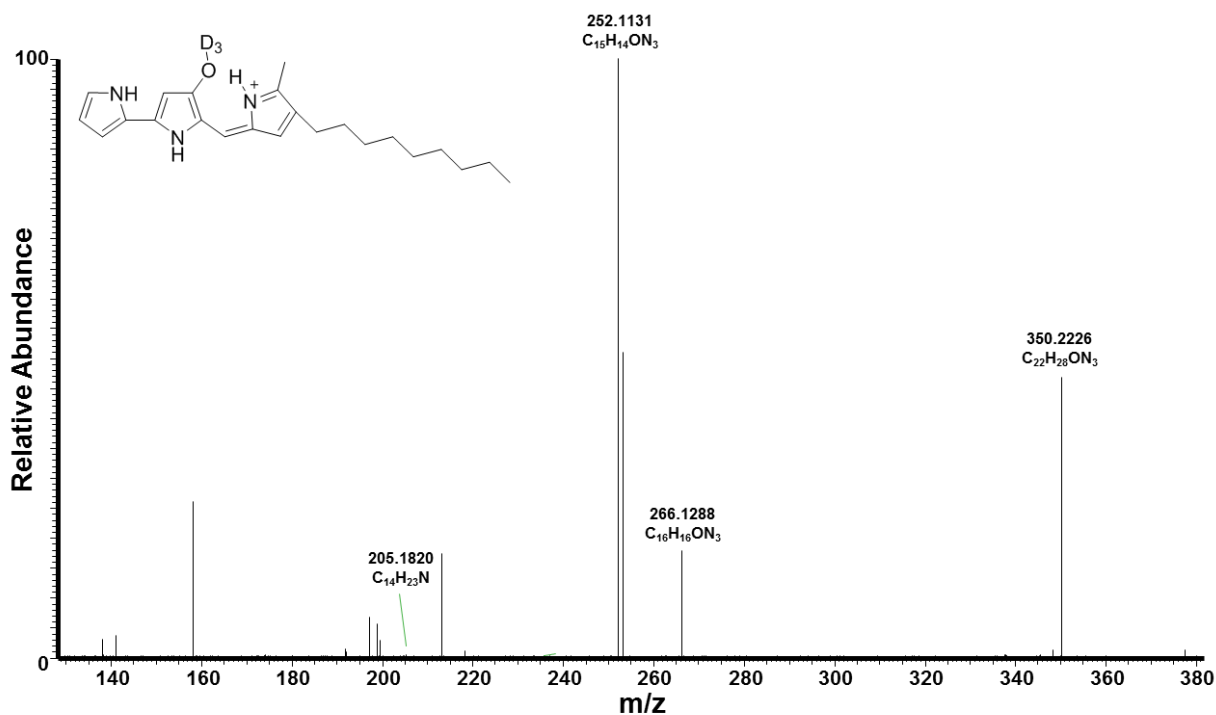

**Fig. S147.** Proposed mass spectral fragmentation pathway of 2-methyl-3-propyl prodiginine with incorporated methyl-D<sub>3</sub> group derived from [methyl-D<sub>3</sub>]-L-methionine (compound 1 [M+H]<sup>+</sup>: *m/z* 299, C<sub>18</sub>H<sub>19</sub>D<sub>3</sub>N<sub>3</sub>O).

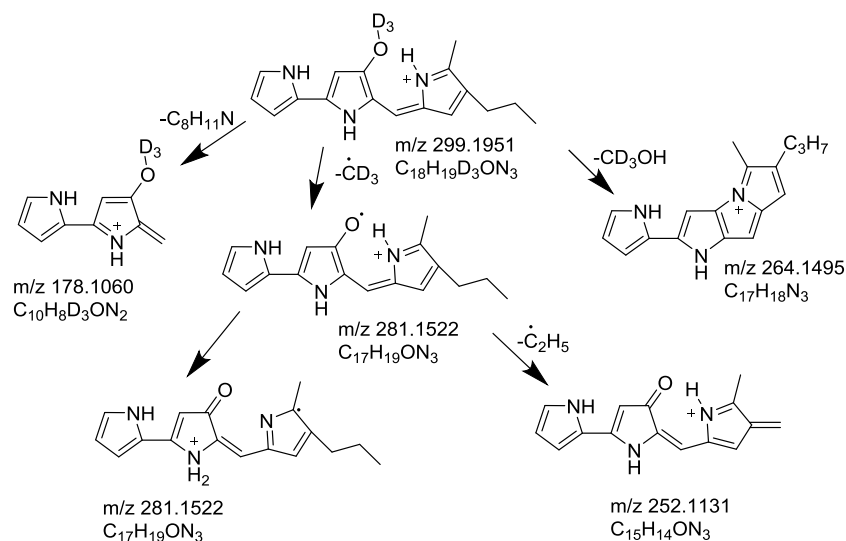

**Fig. S148.** Proposed mass spectral fragmentation pathway of 2-methyl-3-butyl prodiginine with incorporated methyl-D<sub>3</sub> group derived from [methyl-D<sub>3</sub>]-L-methionine (compound 2 [M+H]<sup>+</sup>: *m/z* 313, C<sub>19</sub>H<sub>21</sub>D<sub>3</sub>N<sub>3</sub>O).

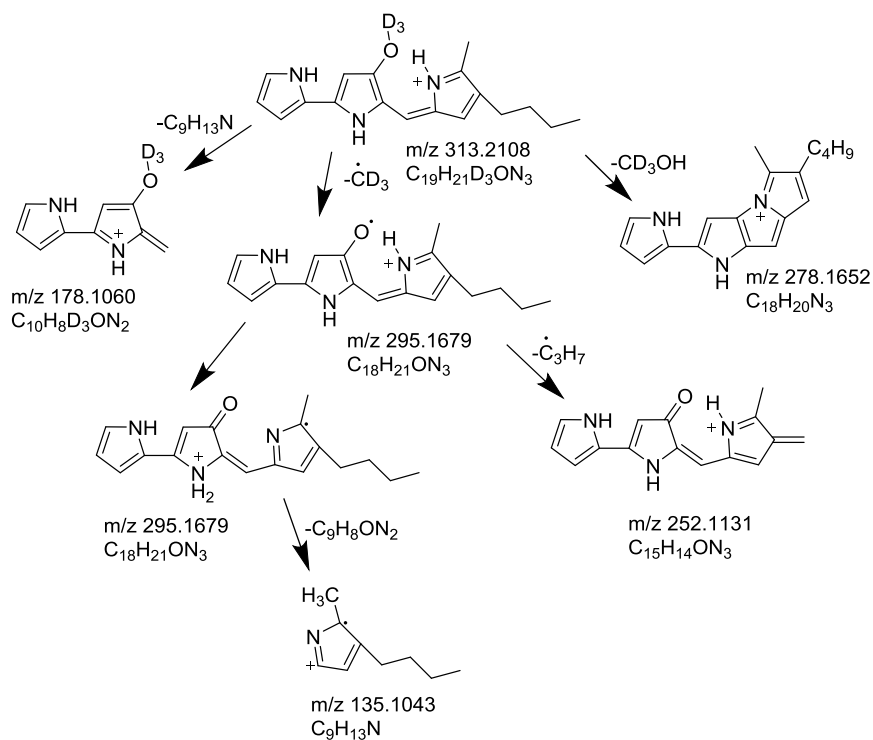

**Fig. S149.** Proposed mass spectral fragmentation pathway of prodigiosin with incorporated methyl-D<sub>3</sub> group derived from [methyl-D<sub>3</sub>]-L-methionine (compound 3 [M+H]<sup>+</sup>: *m/z* 327, C<sub>20</sub>H<sub>23</sub>D<sub>3</sub>N<sub>3</sub>O).

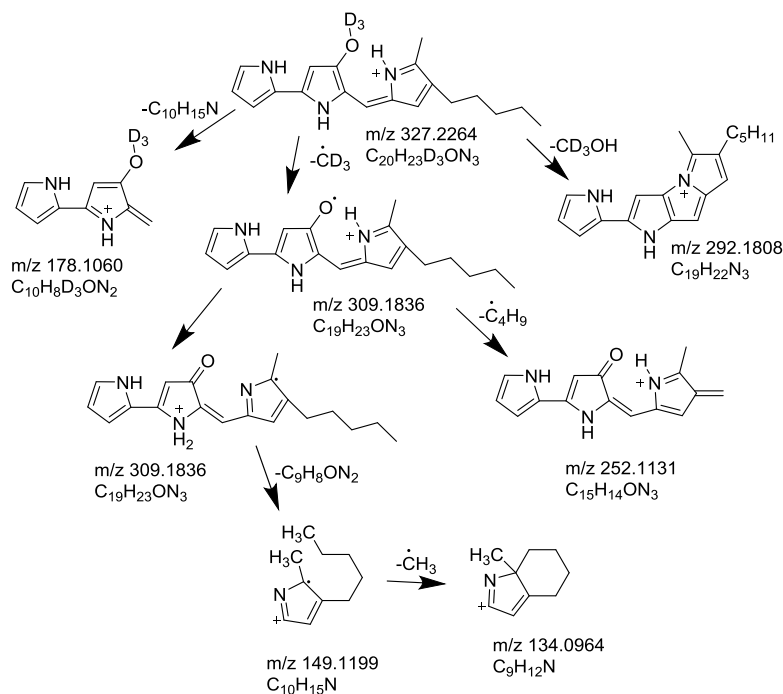

**Fig. S150.** Proposed mass spectral fragmentation pathway of 2-methyl-3-hexyl prodiginine with incorporated methyl-D<sub>3</sub> group derived from [methyl-D<sub>3</sub>]-L-methionine (compound 4 [M+H]<sup>+</sup>: *m/z* 341, C<sub>21</sub>H<sub>25</sub>D<sub>3</sub>N<sub>3</sub>O).

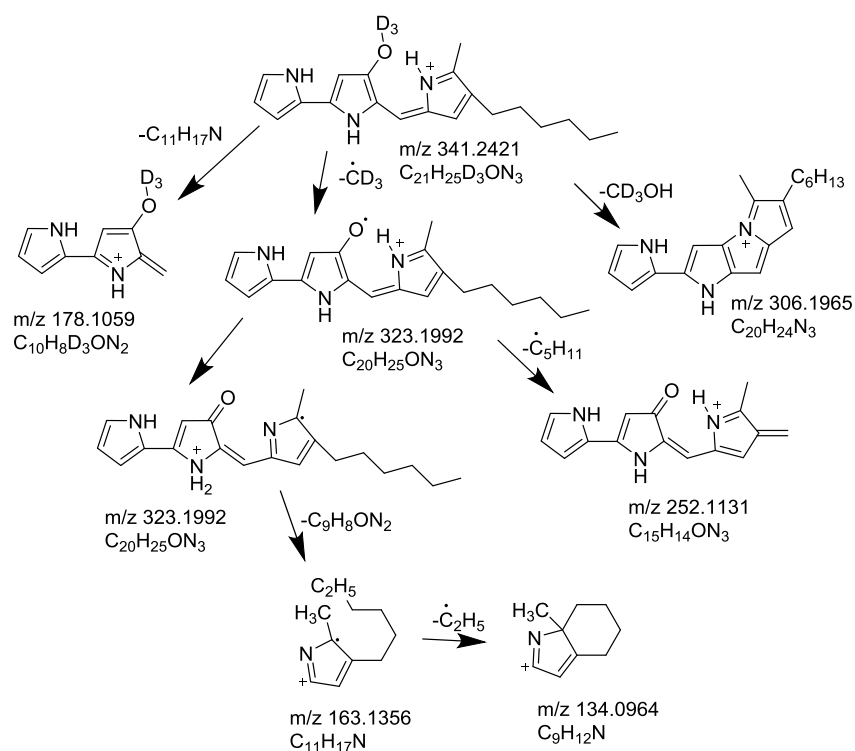

**Fig. S151.** Proposed mass spectral fragmentation pathway of 2-methyl-3-heptyl prodiginine with incorporated methyl-D<sub>3</sub> group derived from [methyl-D<sub>3</sub>]-L-methionine (compound **5** [M+H]<sup>+</sup>: *m/z* 355, C<sub>22</sub>H<sub>27</sub>D<sub>3</sub>N<sub>3</sub>O).

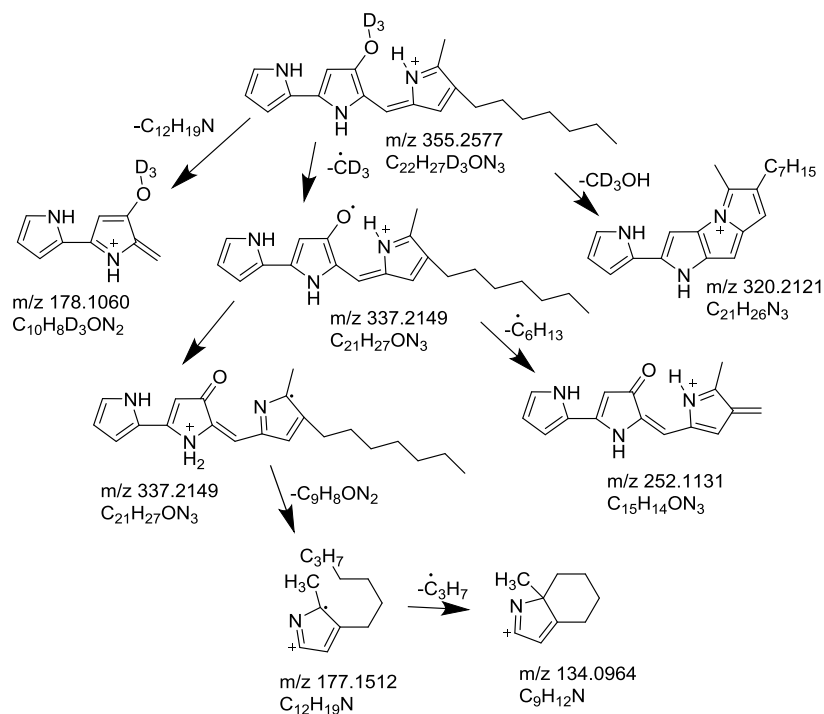

**Fig. S152.** Proposed mass spectral fragmentation pathway of 2-methyl-3-nonyl prodiginine with incorporated methyl-D<sub>3</sub> group derived from [methyl-D<sub>3</sub>]-L-methionine (compound **7** [M+H]<sup>+</sup>: *m/z* 383, C<sub>24</sub>H<sub>31</sub>D<sub>3</sub>N<sub>3</sub>O).

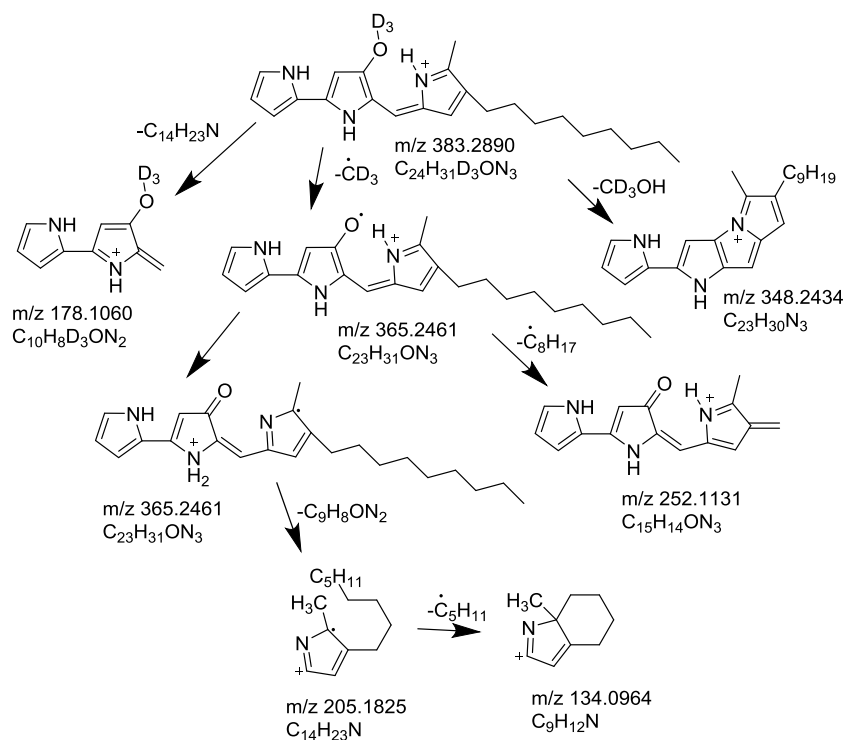

**Fig. S153.** HRMS<sup>2</sup> of 2-methyl-3-propyl prodiginine with incorporated [1-<sup>13</sup>C]-L-proline (compound **1** [M+H]<sup>+</sup>: *m/z* 297, C<sub>17</sub><sup>13</sup>CH<sub>22</sub>N<sub>3</sub>O).

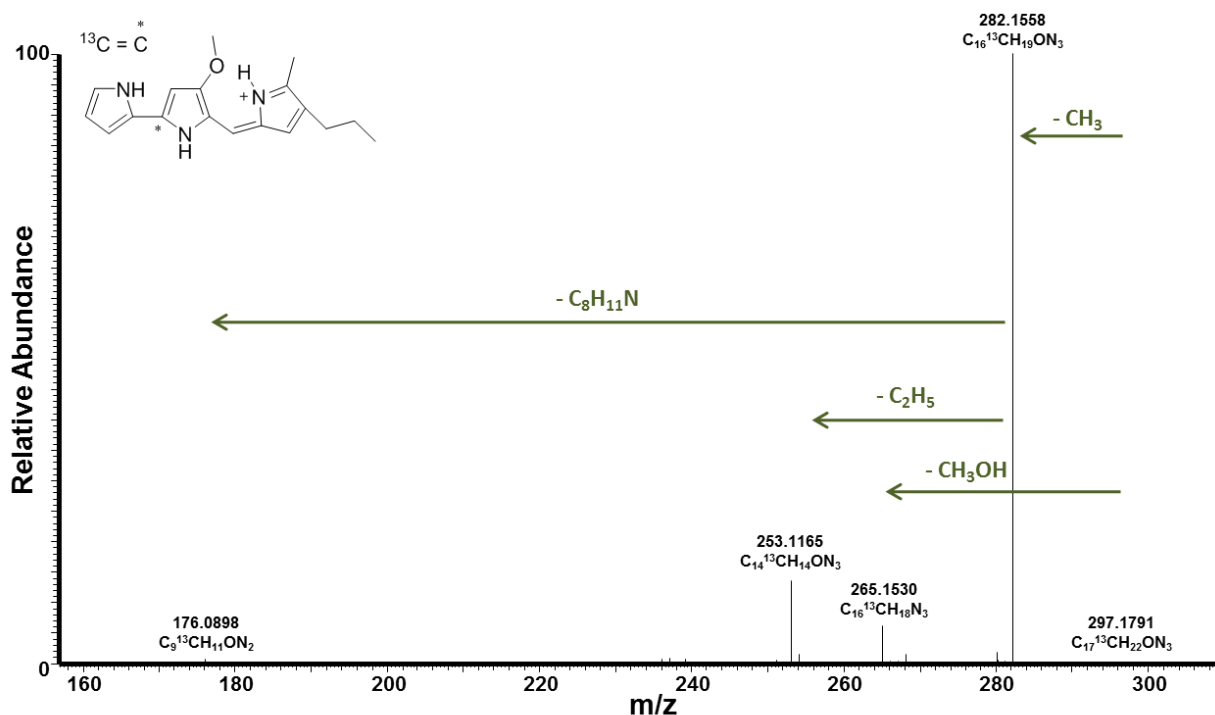

**Fig. S154.** HRMS<sup>2</sup> of 2-methyl-3-butyl prodiginine with incorporated [1-<sup>13</sup>C]-L-proline (compound **2** [M+H]<sup>+</sup>: *m/z* 311, C<sub>18</sub><sup>13</sup>CH<sub>24</sub>N<sub>3</sub>O).

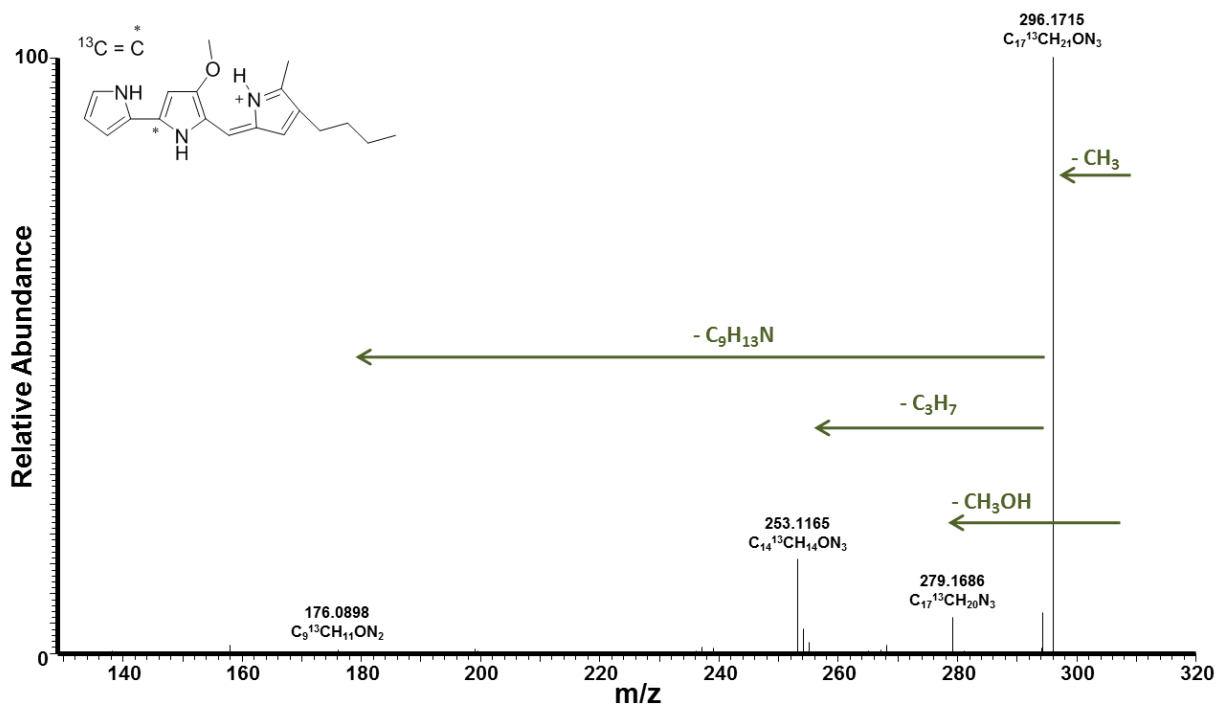

**Fig. S155.** HRMS<sup>2</sup> of prodigiosin with incorporated [1-<sup>13</sup>C]-L-proline (compound **3** [M+H]<sup>+</sup>: *m/z* 325, C<sub>19</sub><sup>13</sup>CH<sub>26</sub>N<sub>3</sub>O).

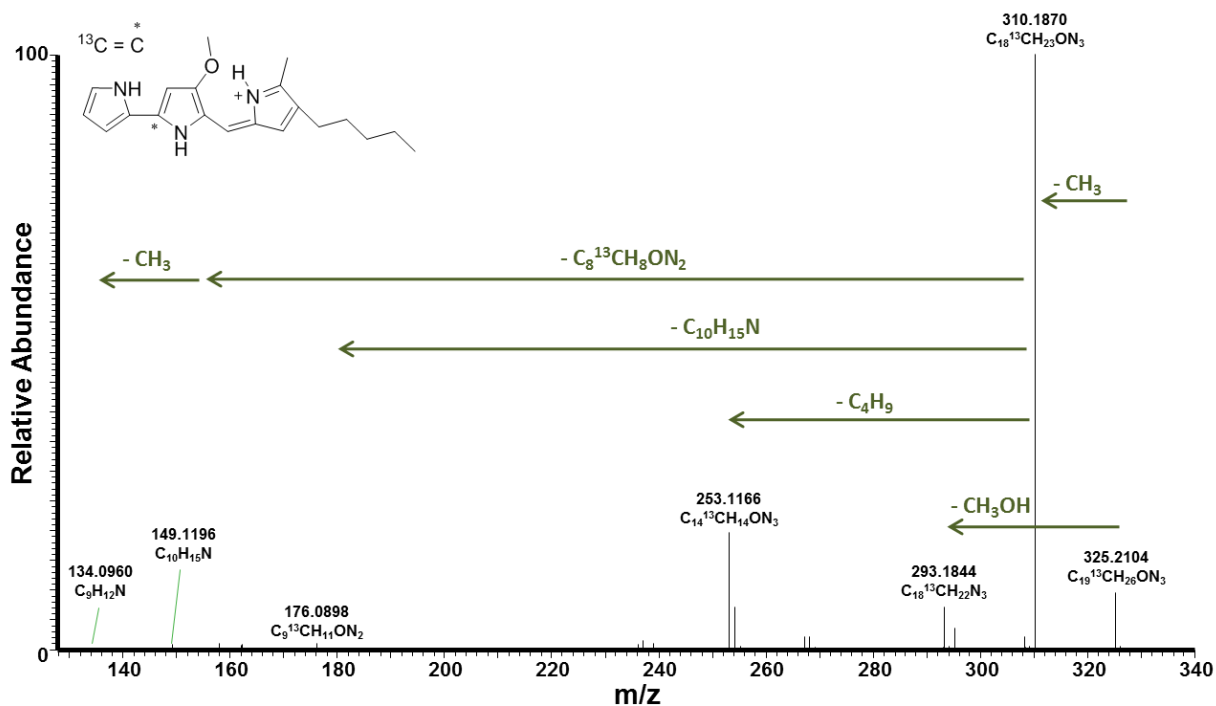

**Fig. S156.** HRMS<sup>2</sup> of 2-methyl-3-hexyl prodiginine with incorporated [1-<sup>13</sup>C]-L-proline (compound **4** [M+H]<sup>+</sup>: *m/z* 339, C<sub>20</sub><sup>13</sup>CH<sub>28</sub>N<sub>3</sub>O).

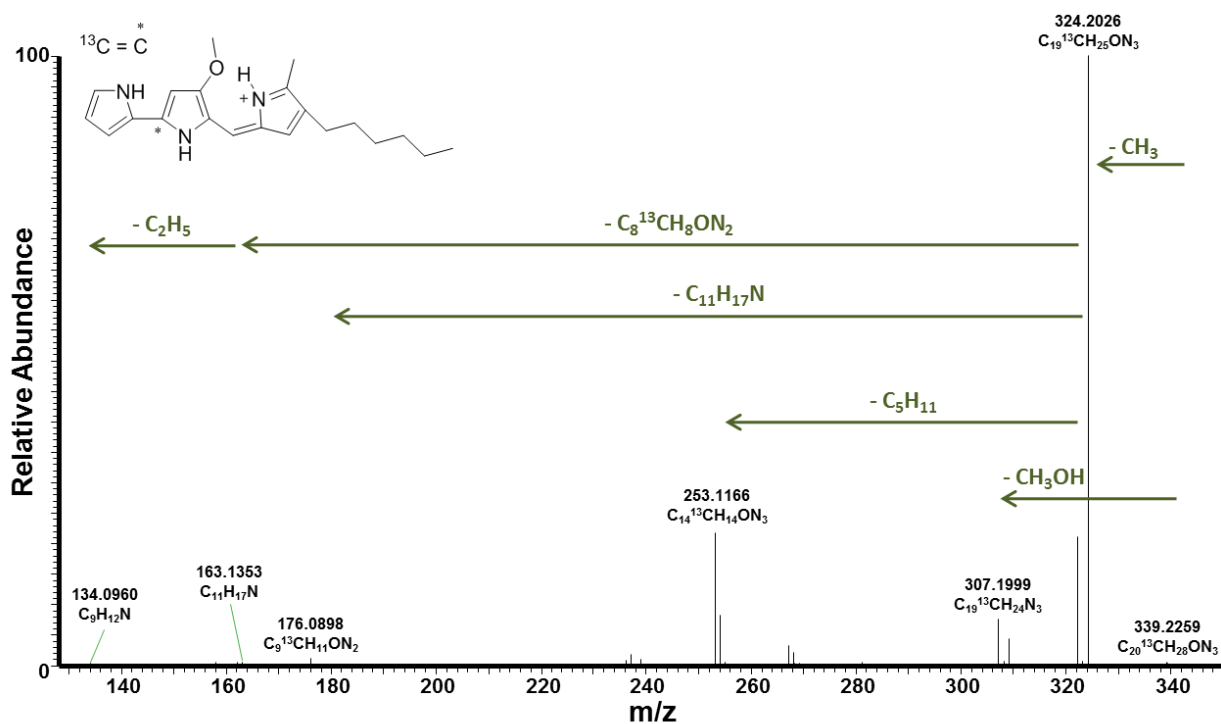



**Fig. S157.** HRMS<sup>2</sup> of 2-methyl-3-heptyl prodiginine with incorporated [1-<sup>13</sup>C]-L-proline (compound **5** [M+H]<sup>+</sup>: *m/z* 353, C<sub>21</sub><sup>13</sup>CH<sub>30</sub>N<sub>3</sub>O).

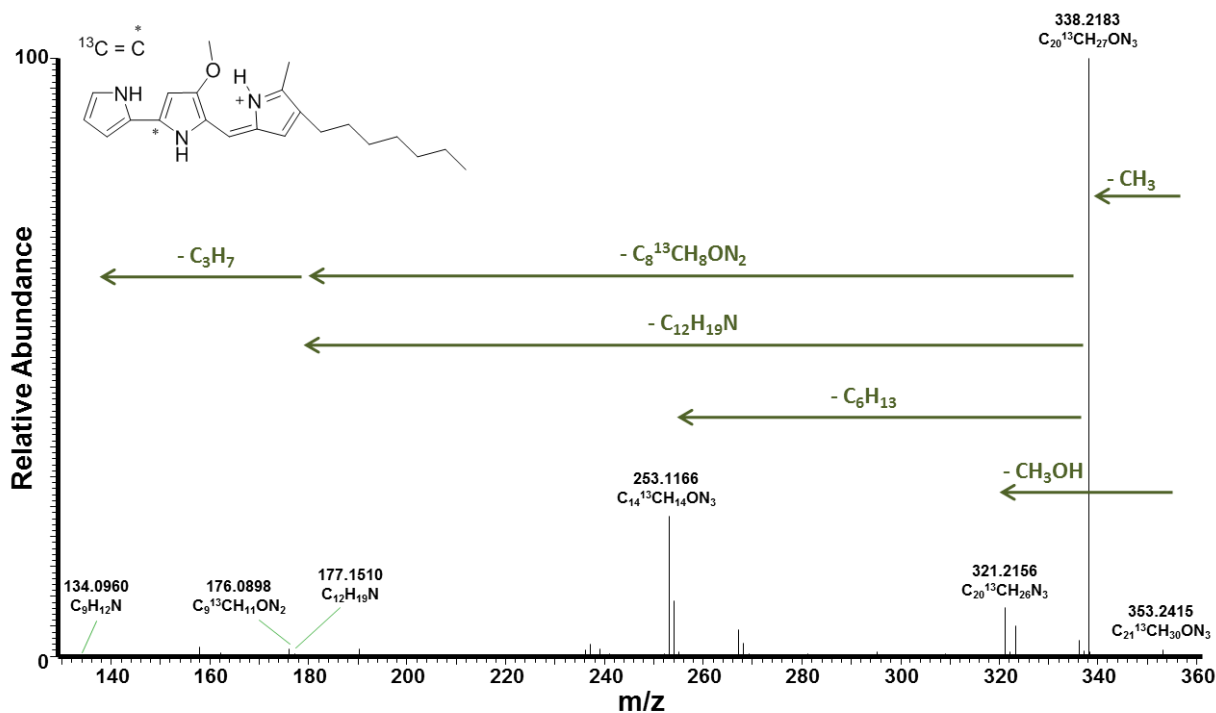

**Fig. S158.** HRMS<sup>2</sup> of 2-methyl-3-nonyl prodiginine with incorporated [1-<sup>13</sup>C]-L-proline (compound **7** [M+H]<sup>+</sup>: *m/z* 381, C<sub>23</sub><sup>13</sup>CH<sub>34</sub>N<sub>3</sub>O).

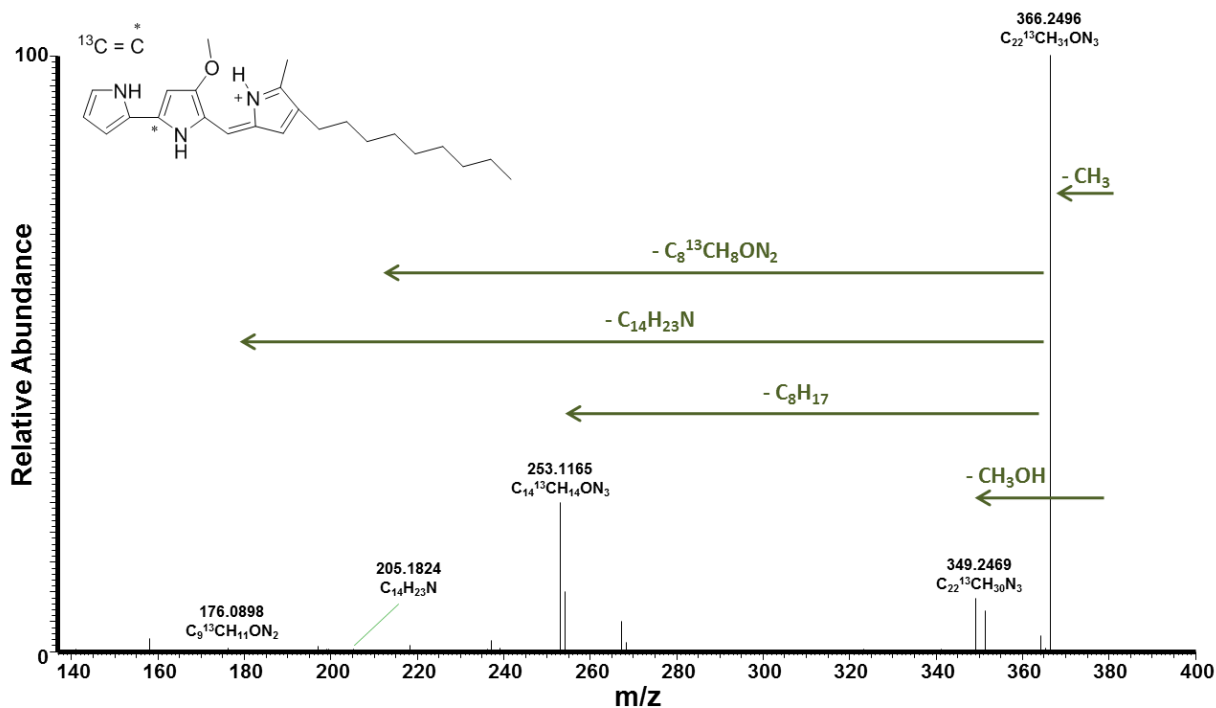

**Fig. S159.** HRMS<sup>3</sup> of 2-methyl-3-propyl prodiginine with incorporated [1-<sup>13</sup>C]-L-proline (compound **1** [M+H]<sup>+</sup>:  $m/z$  297 via 282, C<sub>17</sub><sup>13</sup>CH<sub>22</sub>N<sub>3</sub>O).

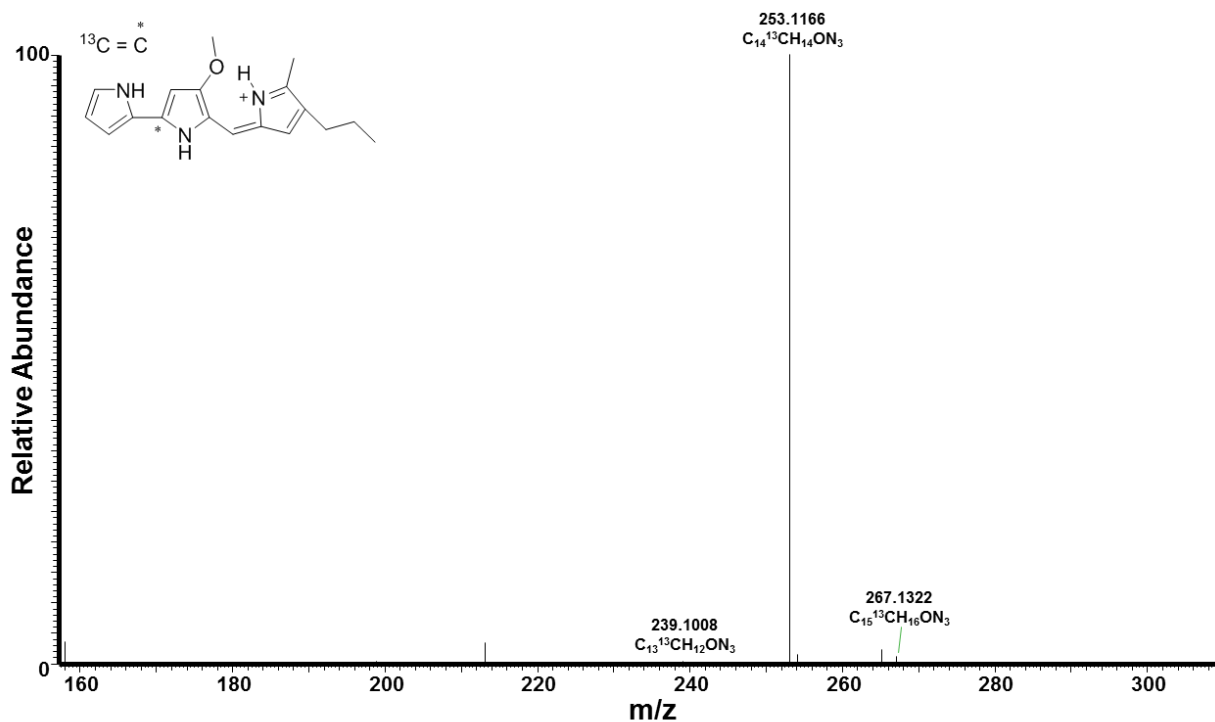

**Fig. S160.** HRMS<sup>3</sup> of 2-methyl-3-butyl prodiginine with incorporated [1-<sup>13</sup>C]-L-proline (compound **2** [M+H]<sup>+</sup>:  $m/z$  311 via 296, C<sub>18</sub><sup>13</sup>CH<sub>24</sub>N<sub>3</sub>O).

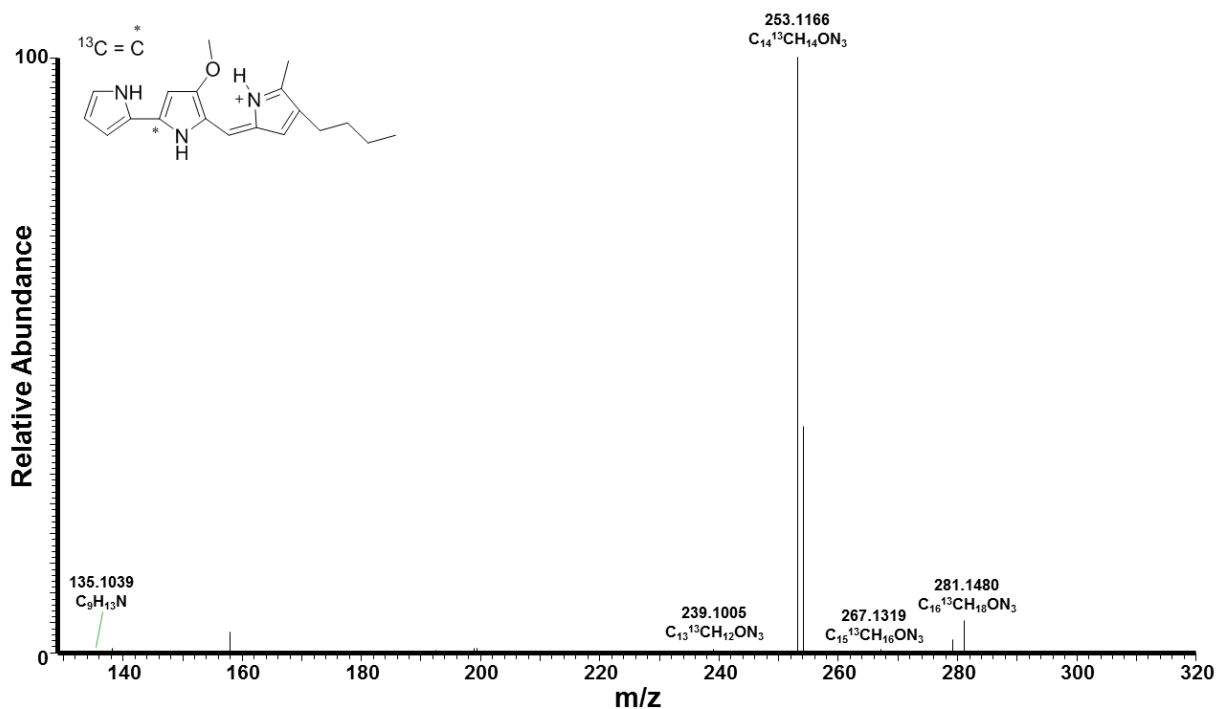

**Fig. S161.** HRMS<sup>3</sup> of prodigiosin with incorporated [1-<sup>13</sup>C]-L-proline (compound **3** [M+H]<sup>+</sup>: *m/z* 325 via 310, C<sub>19</sub><sup>13</sup>CH<sub>26</sub>N<sub>3</sub>O).

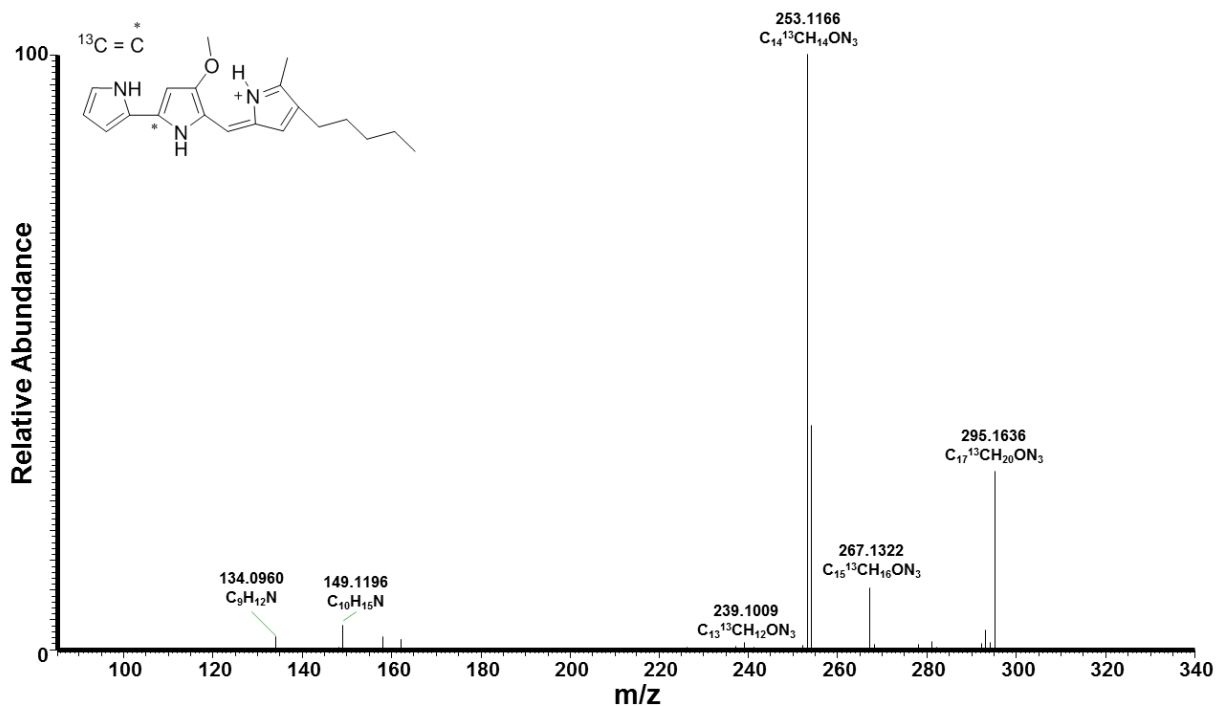

**Fig. S162.** HRMS<sup>3</sup> of 2-methyl-3-hexyl prodiginine with incorporated [1-<sup>13</sup>C]-L-proline (compound **4** [M+H]<sup>+</sup>: *m/z* 339 via 324, C<sub>20</sub><sup>13</sup>CH<sub>28</sub>N<sub>3</sub>O).

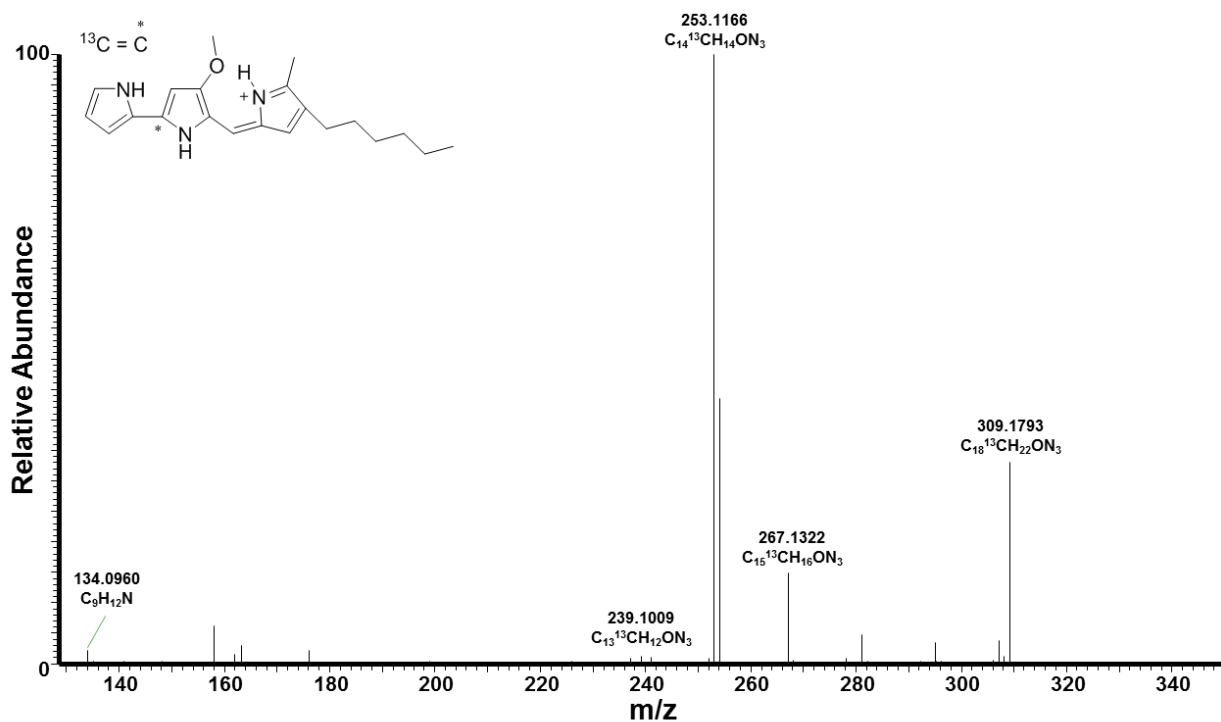

**Fig. S163.** HRMS<sup>3</sup> of 2-methyl-3-heptyl prodiginine with incorporated [1-<sup>13</sup>C]-L-proline (compound **5** [M+H]<sup>+</sup>: *m/z* 353 via 338, C<sub>21</sub><sup>13</sup>CH<sub>30</sub>N<sub>3</sub>O).

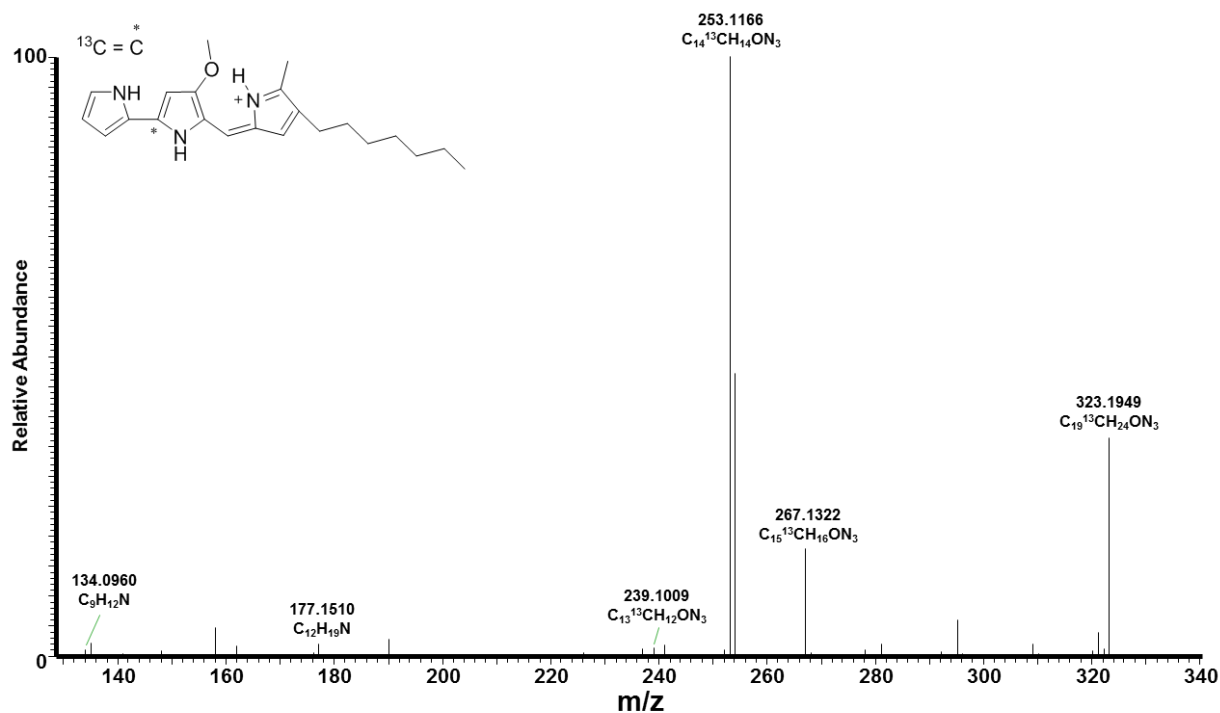

**Fig. S164.** HRMS<sup>3</sup> of 2-methyl-3-nonyl prodiginine with incorporated [1-<sup>13</sup>C]-L-proline (compound **7** [M+H]<sup>+</sup>: *m/z* 381 via 366, C<sub>23</sub><sup>13</sup>CH<sub>34</sub>N<sub>3</sub>O).

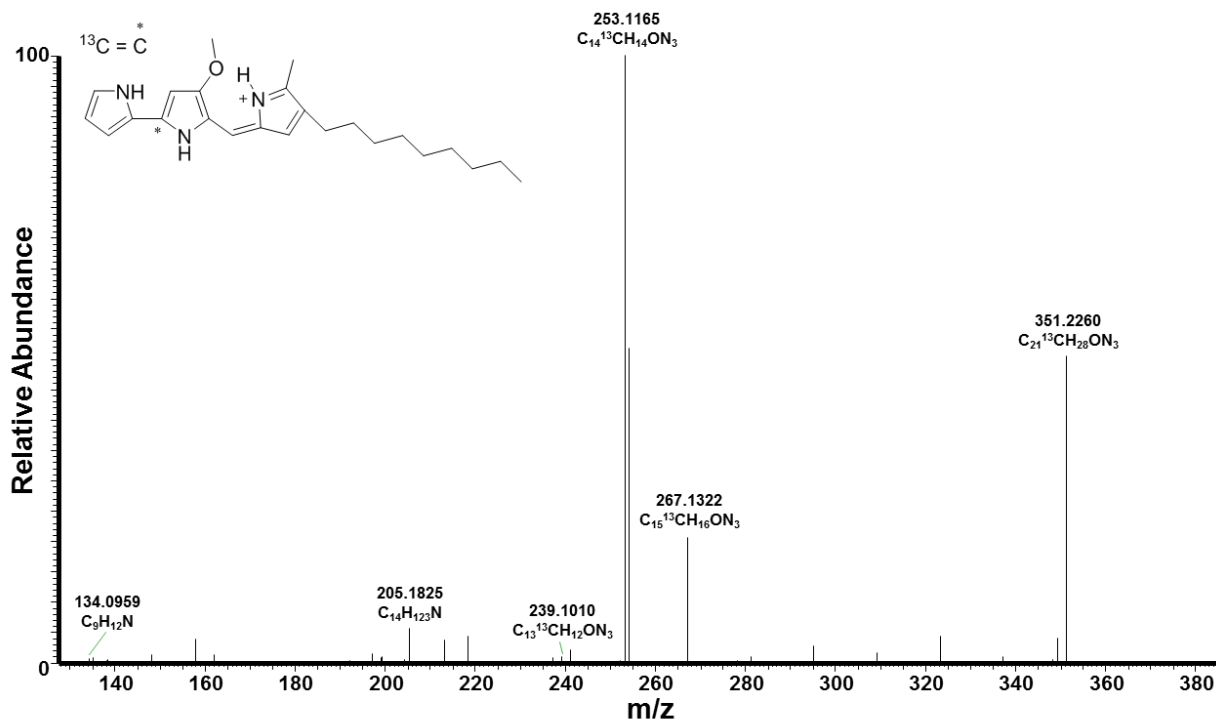

**Fig. S165.** Proposed mass spectral fragmentation pathway of 2-methyl-3-propyl prodiginine with incorporated [1-<sup>13</sup>C]-L-proline (compound **1** [M+H]<sup>+</sup>: *m/z* 297, C<sub>17</sub><sup>13</sup>CH<sub>22</sub>N<sub>3</sub>O).

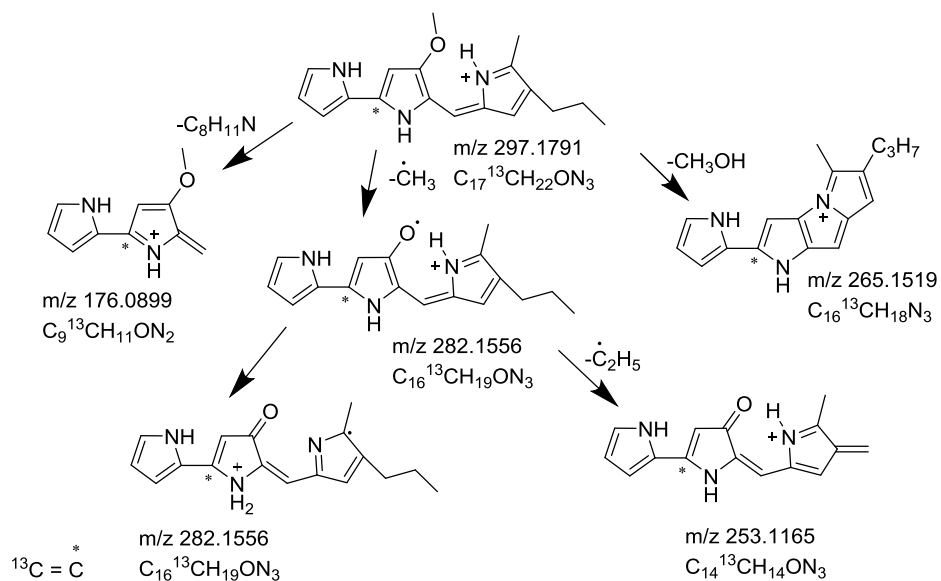

**Fig. S166.** Proposed mass spectral fragmentation pathway of 2-methyl-3-butyl prodiginine with incorporated [1-<sup>13</sup>C]-L-proline (compound **2** [M+H]<sup>+</sup>: *m/z* 311, C<sub>18</sub><sup>13</sup>CH<sub>24</sub>N<sub>3</sub>O).

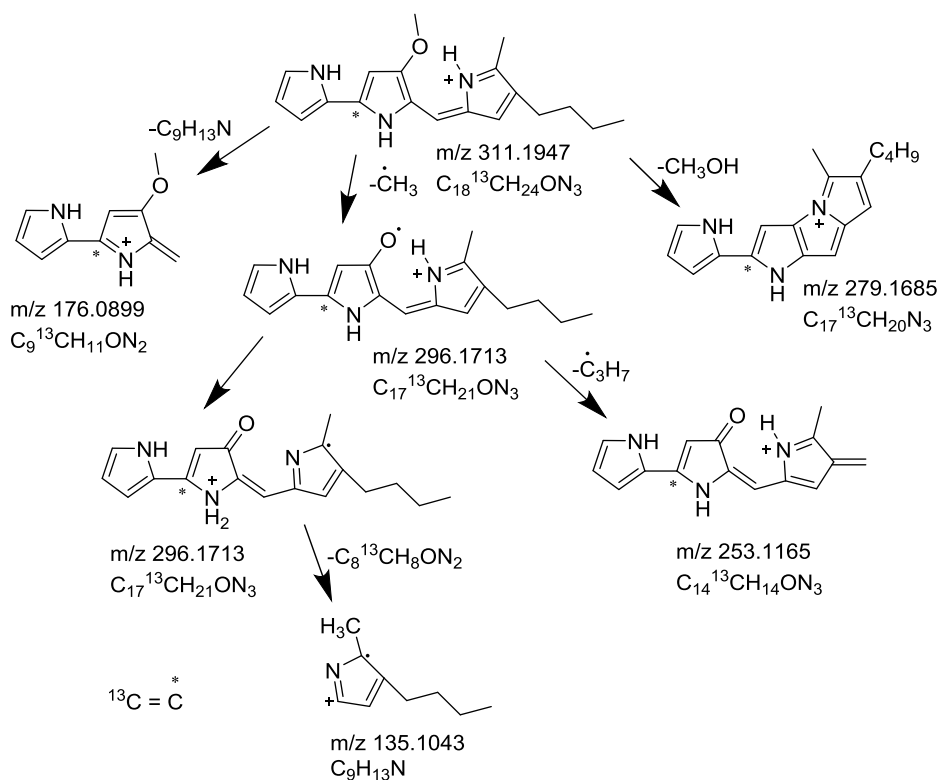

**Fig. S167.** Proposed mass spectral fragmentation pathway of prodigiosin with incorporated [1-<sup>13</sup>C]-L-proline (compound **3** [M+H]<sup>+</sup>: *m/z* 325, C<sub>19</sub><sup>13</sup>CH<sub>26</sub>N<sub>3</sub>O).

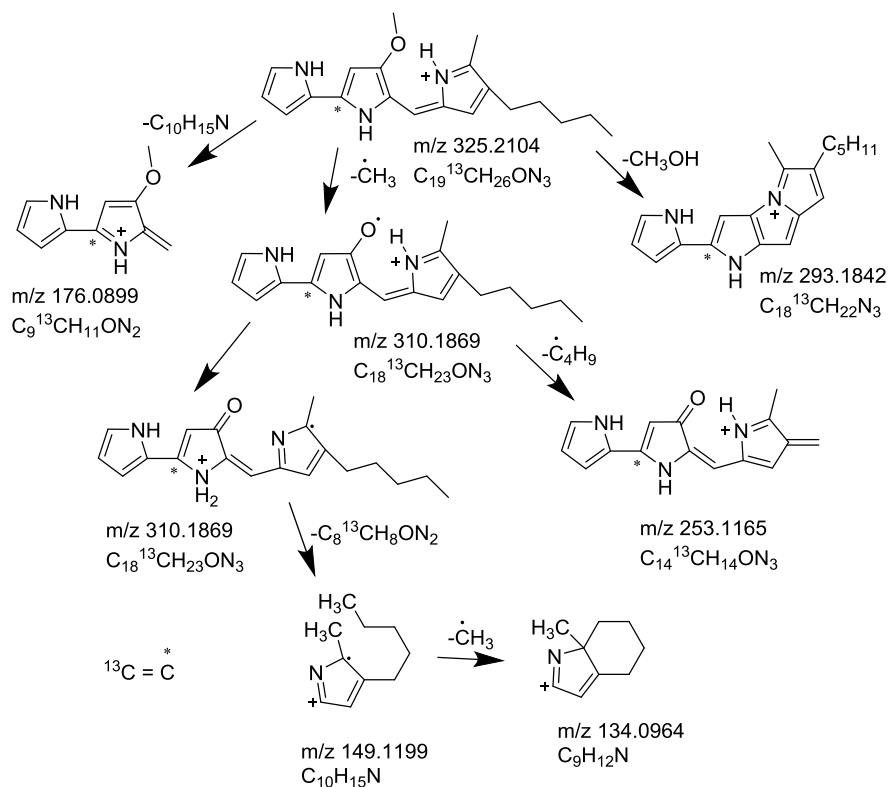

**Fig. S168.** Proposed mass spectral fragmentation pathway of 2-methyl-3-hexyl prodiginine with incorporated [1-<sup>13</sup>C]-L-proline (compound **4** [M+H]<sup>+</sup>: *m/z* 339, C<sub>20</sub><sup>13</sup>CH<sub>28</sub>N<sub>3</sub>O).

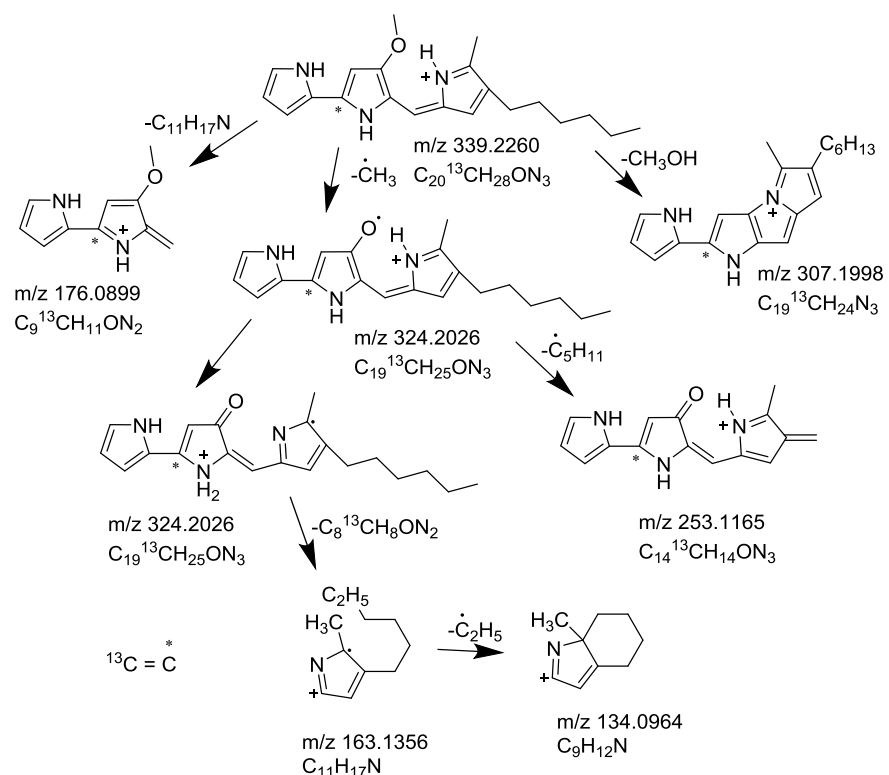

**Fig. S169.** Proposed mass spectral fragmentation pathway of 2-methyl-3-heptyl prodiginine with incorporated [1-<sup>13</sup>C]-L-proline (compound **5** [M+H]<sup>+</sup>: *m/z* 353, C<sub>21</sub><sup>13</sup>CH<sub>30</sub>N<sub>3</sub>O).

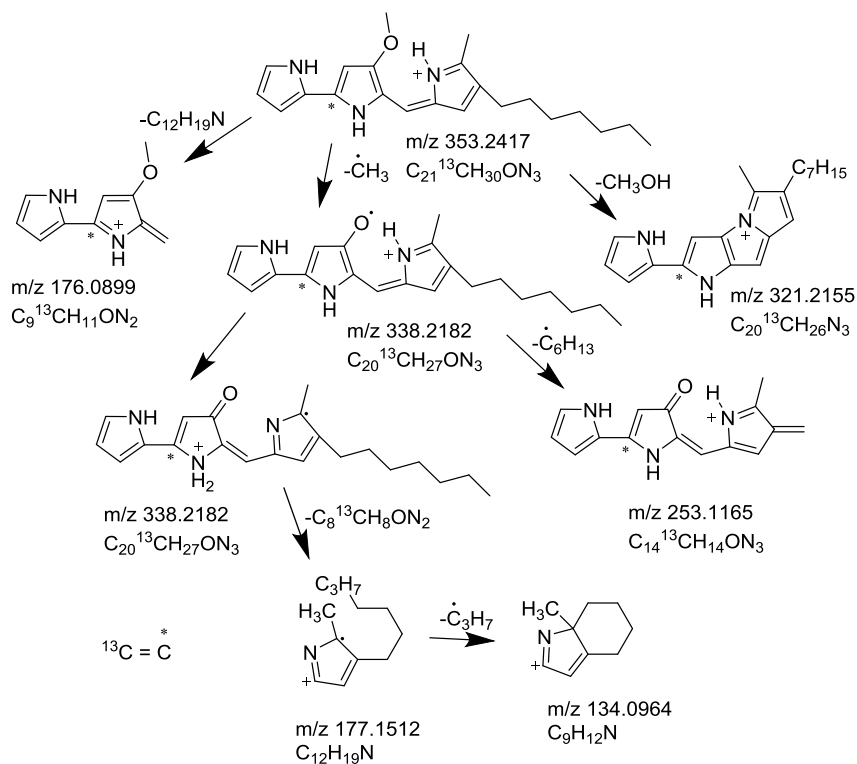

**Fig. S170.** Proposed mass spectral fragmentation pathway of 2-methyl-3-nonyl prodiginine with incorporated [1-<sup>13</sup>C]-L-proline (compound **7** [M+H]<sup>+</sup>: *m/z* 381, C<sub>23</sub><sup>13</sup>CH<sub>34</sub>N<sub>3</sub>O).

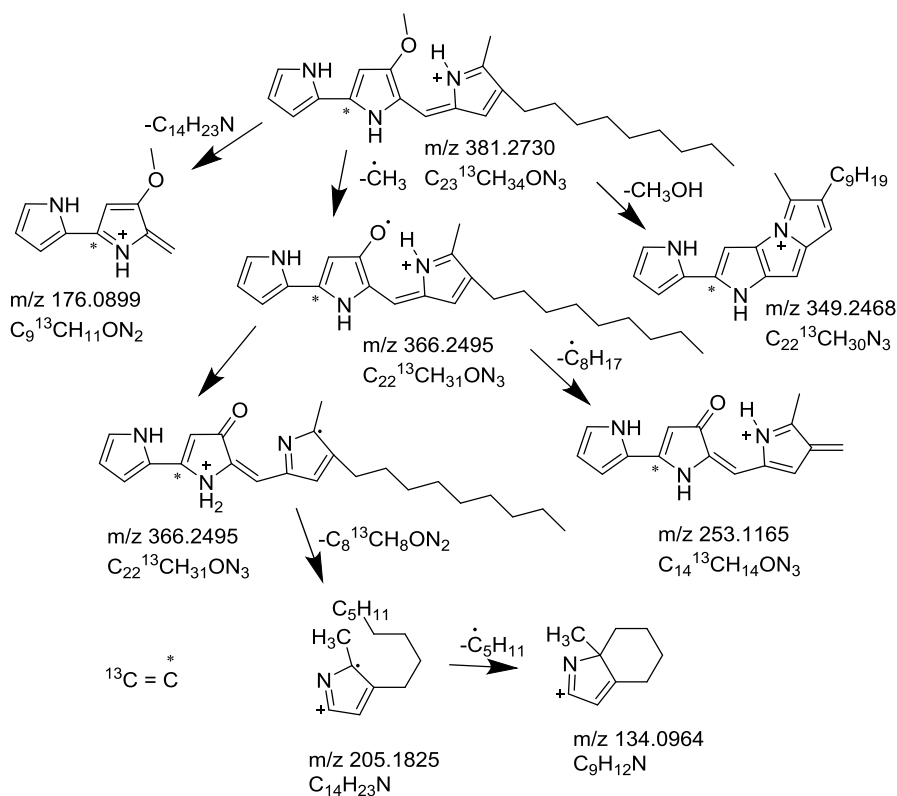

**Fig. S171.** HRMS<sup>2</sup> of prodigiosin with 5 incorporated [1,2-<sup>13</sup>C<sub>2</sub>]-acetate units (compound **3** [M+H]<sup>+</sup>: *m/z* 334, C<sub>10</sub><sup>13</sup>C<sub>10</sub>H<sub>26</sub>N<sub>3</sub>O).

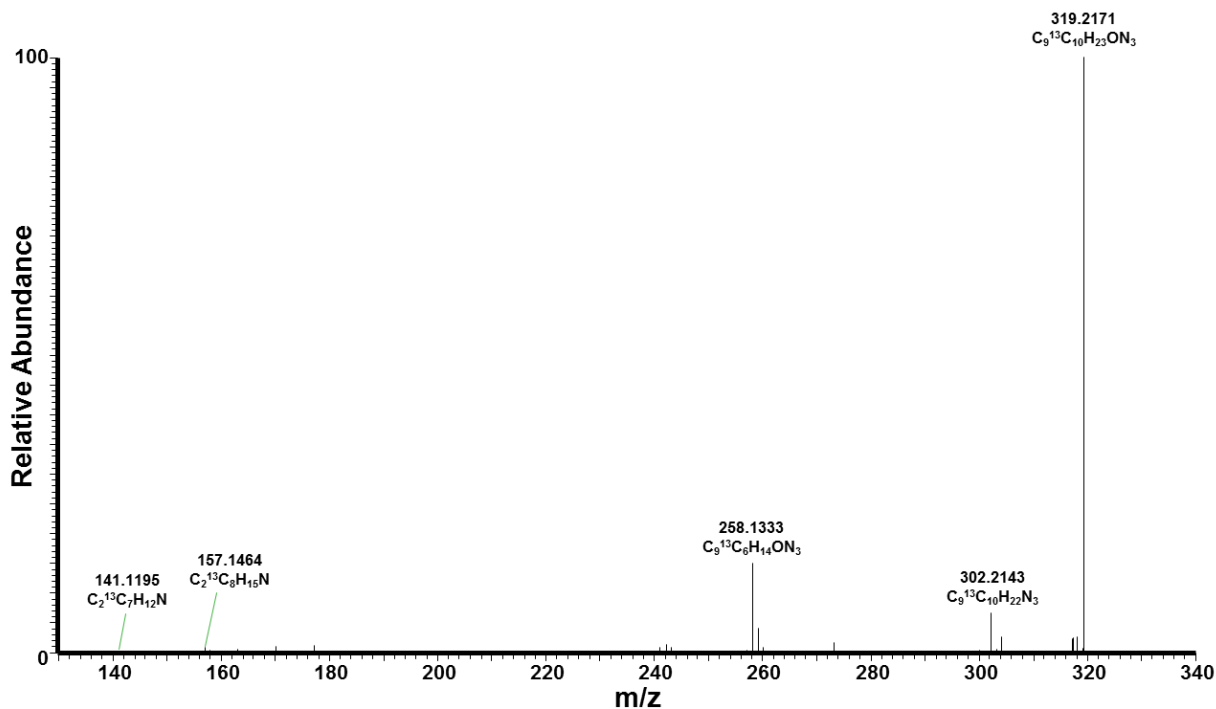

**Fig. S172.** HRMS<sup>2</sup> of prodigiosin with 6 incorporated [1,2-<sup>13</sup>C<sub>2</sub>]-acetate units (compound **3** [M+H]<sup>+</sup>: *m/z* 336, C<sub>8</sub><sup>13</sup>C<sub>12</sub>H<sub>26</sub>N<sub>3</sub>O).

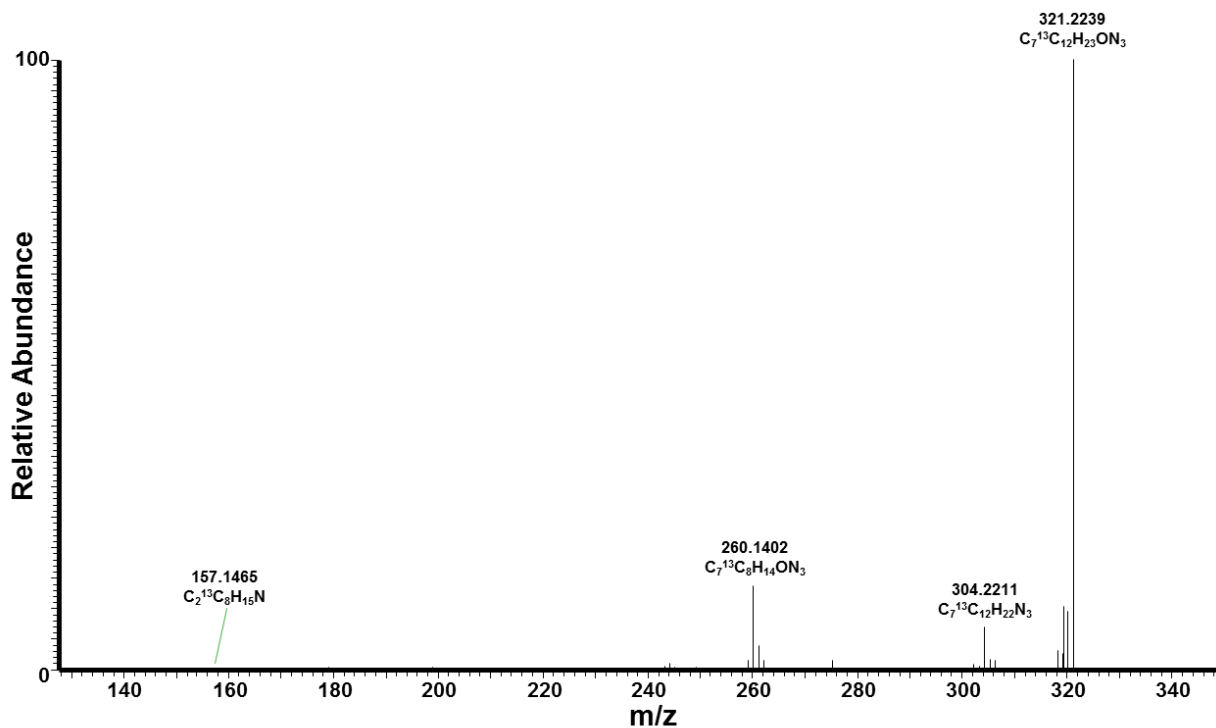



**Fig. S173.** HRMS<sup>2</sup> of prodigiosin with 7 incorporated [1,2-<sup>13</sup>C<sub>2</sub>]-acetate units (compound **3** [M+H]<sup>+</sup>: *m/z* 338, C<sub>6</sub><sup>13</sup>C<sub>14</sub>H<sub>26</sub>N<sub>3</sub>O).

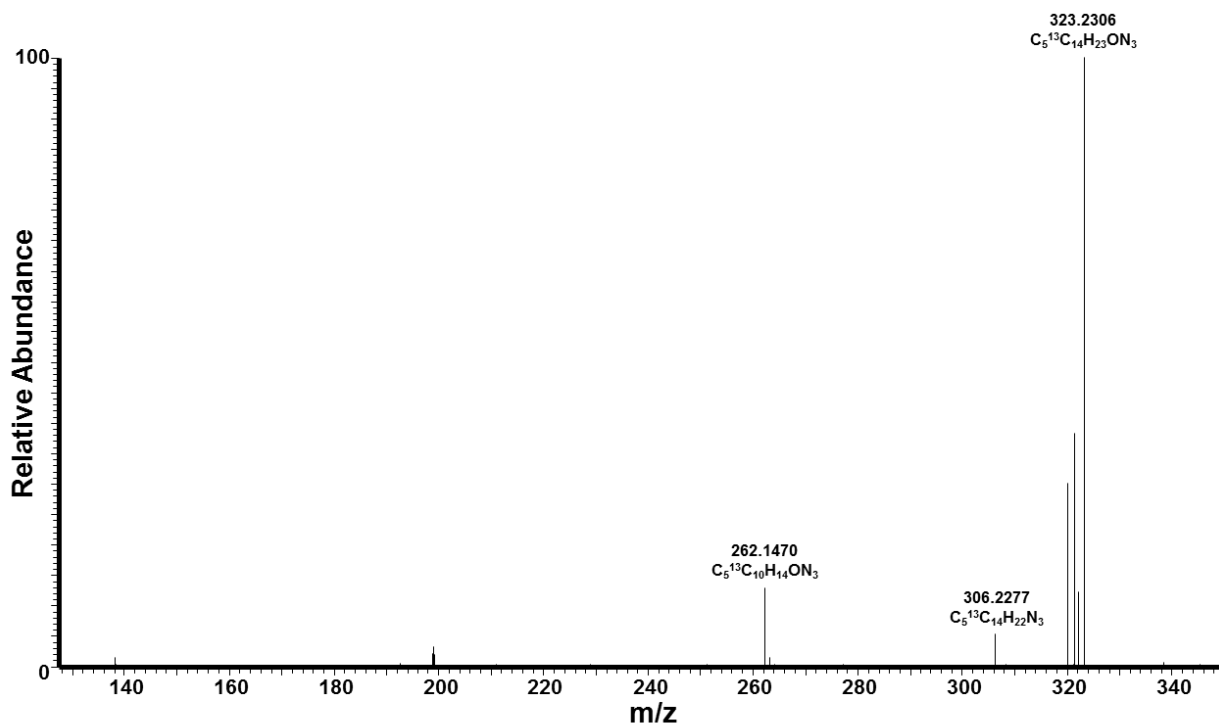

**Fig. S174.** Confrontation assay of endophytic *Pichia* spp. against *S. aureus* (DSM 799) and *E. coli* (DSM 682).

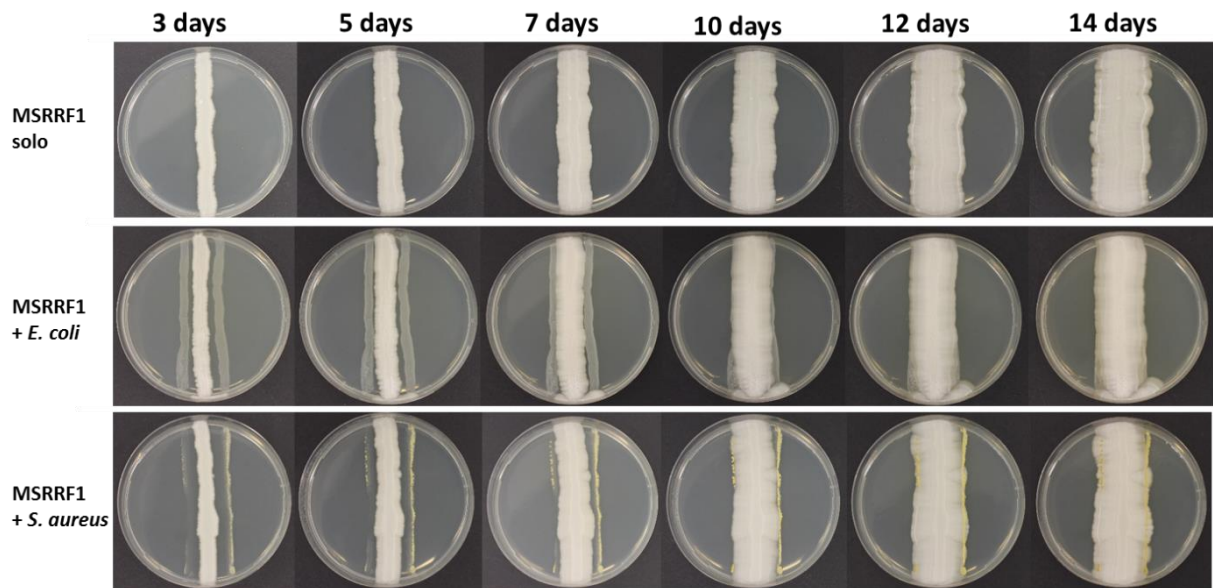

**Fig. S175.** Confrontation assay of endophytic *A. caesiellus* against *S. aureus* (DSM 799) and *E. coli* (DSM 682).

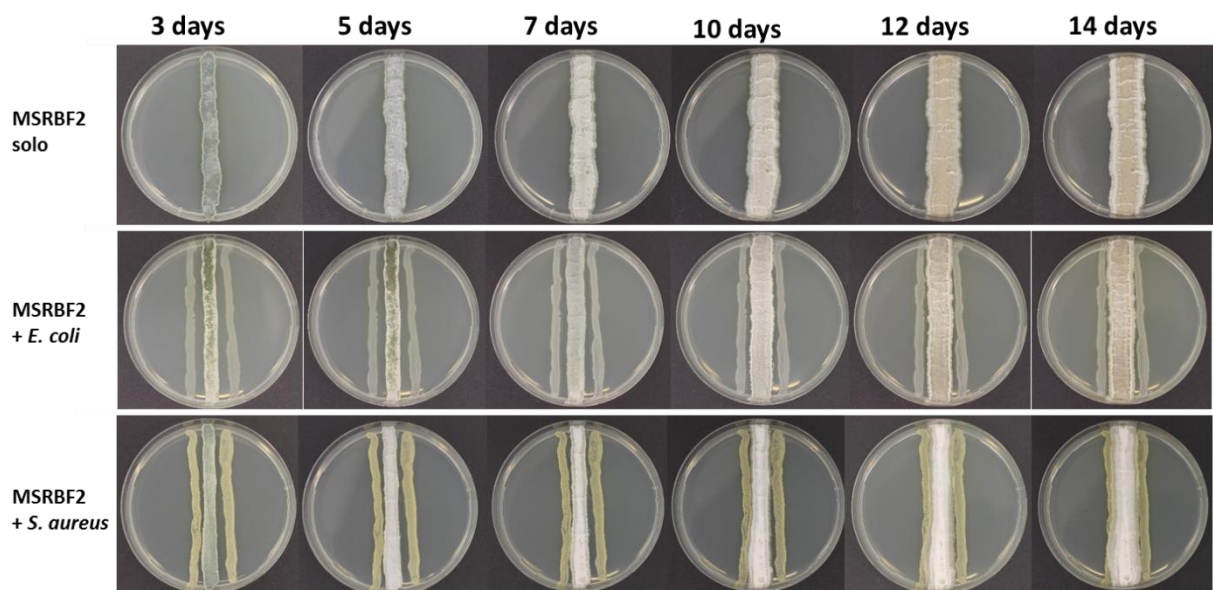

**Fig. S176.** Confrontation assay of endophytic *P. virgatula* against *S. aureus* (DSM 799) and *E. coli* (DSM 682).

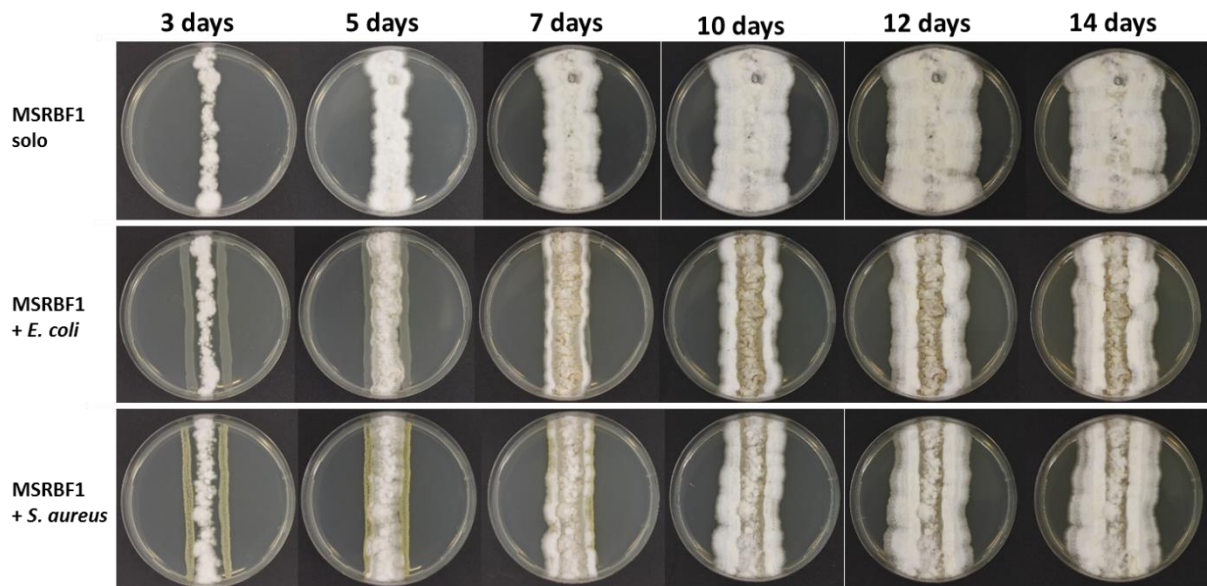

**Fig. S177.** Scanning electron microscopic images of endophytic *S. marcescens* MSRBB2.

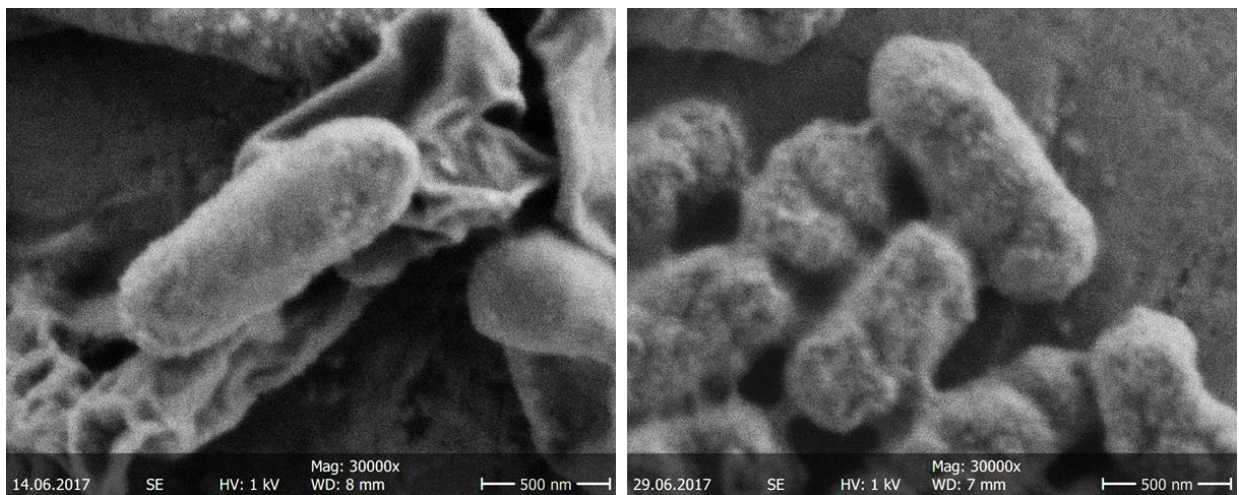

**Fig. S178.** Scanning electron microscopic images of endophytic *P. virgatula*.

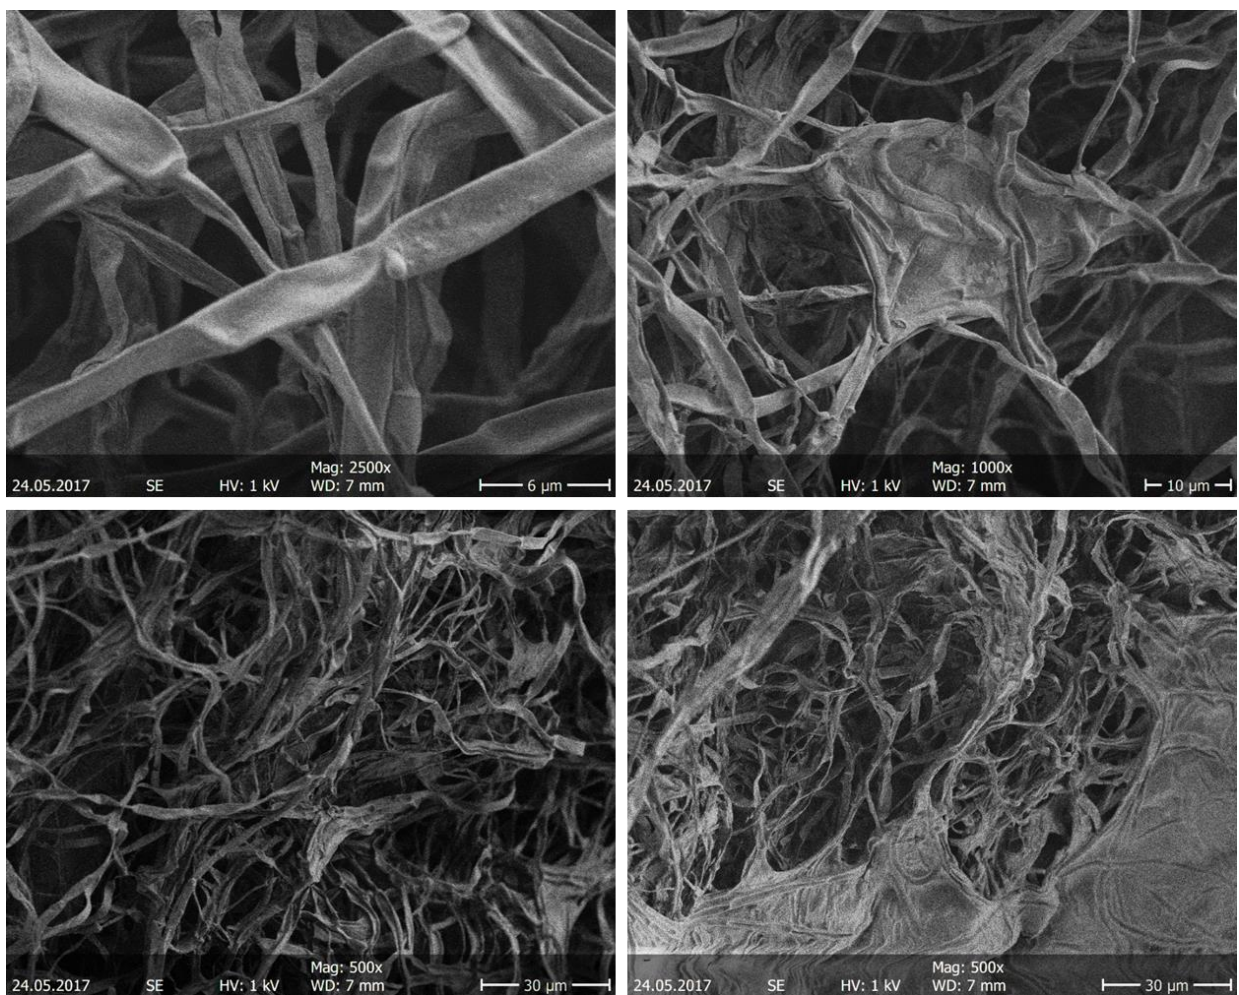

**Fig. S179.** Scanning electron microscopic images (1) of endophytic *A. caesiellus*.

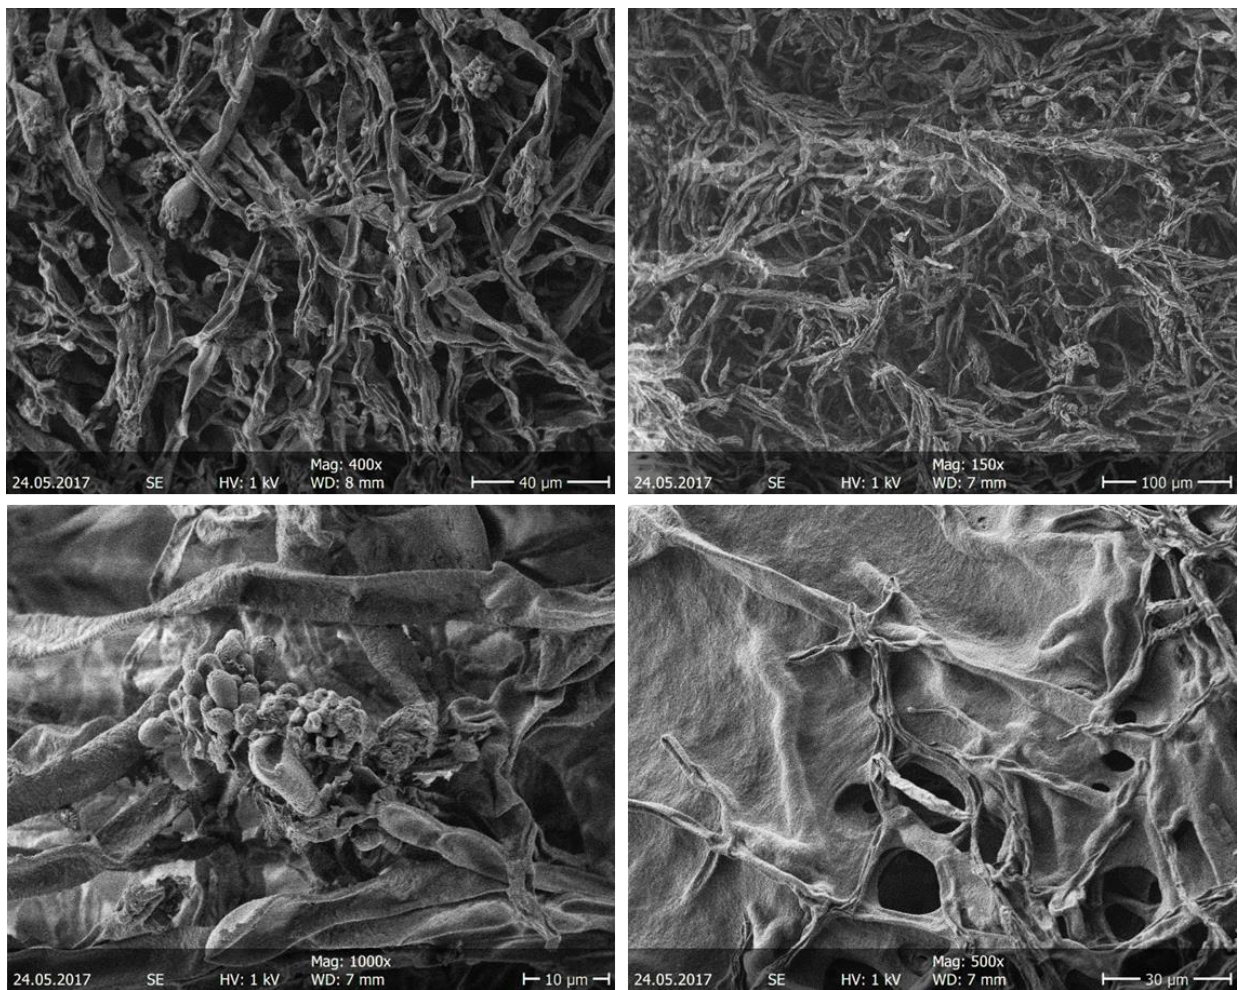

**Fig. S180.** Scanning electron microscopic images (2) of endophytic *A. caesiellus*.

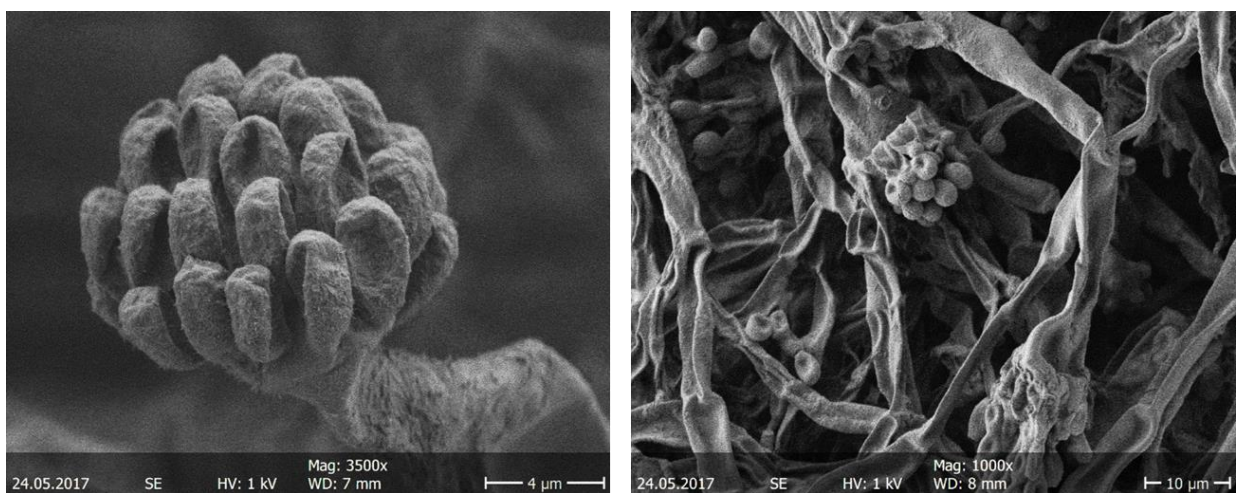

**Fig. S181.** Scanning electron microscopic images (1) of endophytic *Pichia* spp.

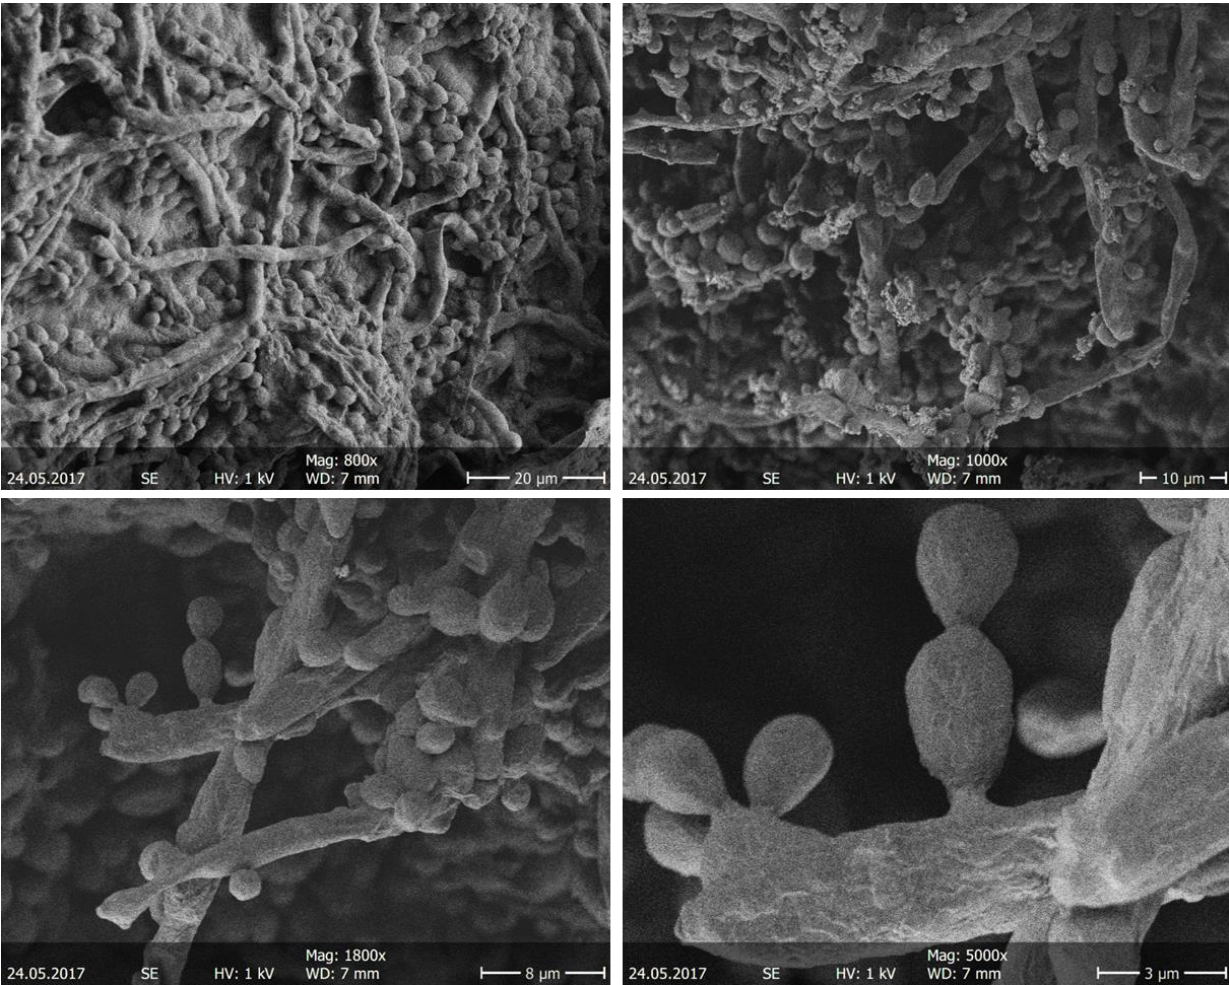

**Fig. S182.** Scanning electron microscopic images (2) of endophytic *Pichia* spp.

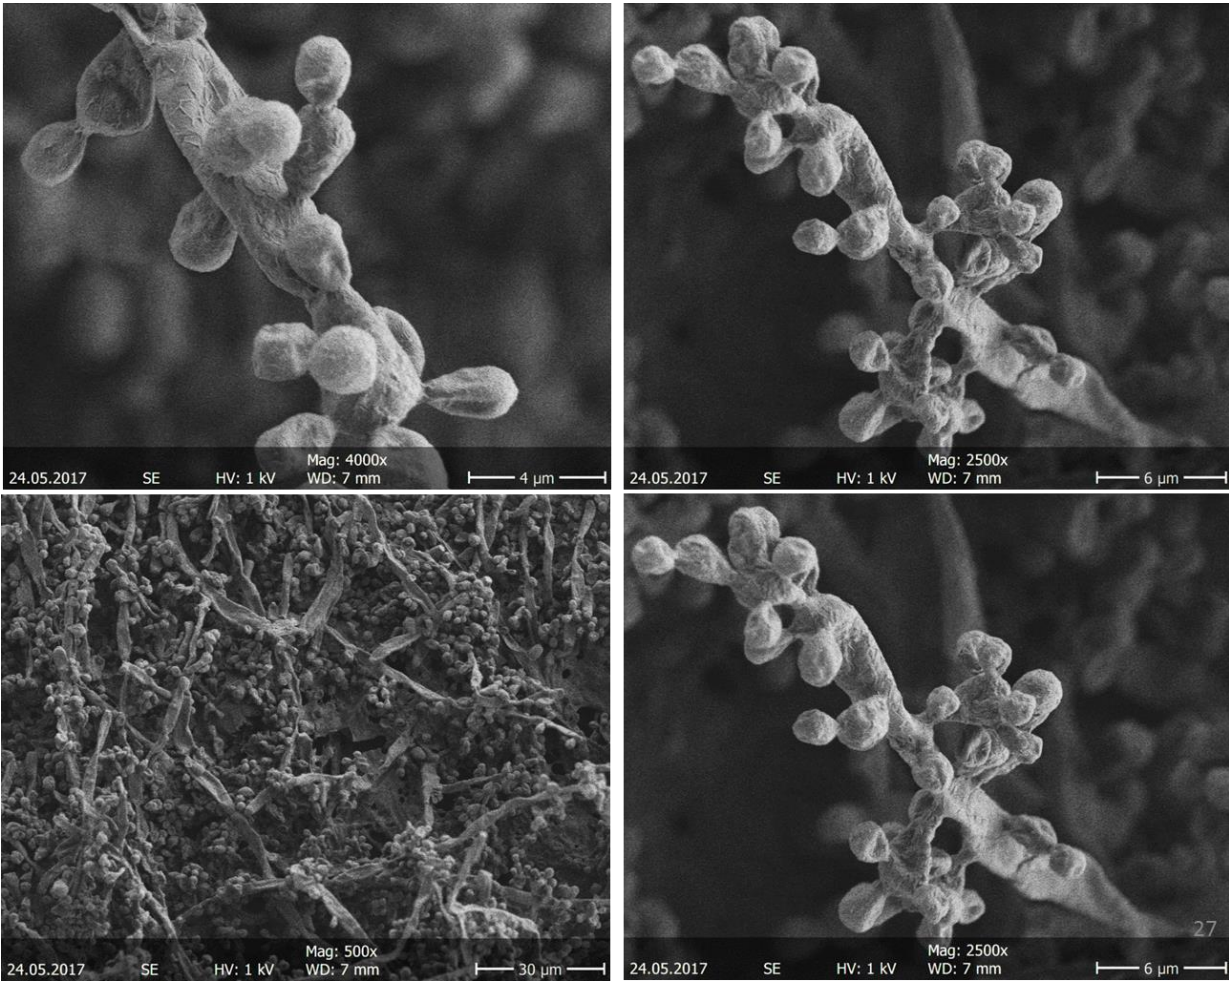

**Fig. S183.** Scanning electron microscopic images (1) of co-cultivation of endophytic *P. virgatula* and *S. marcescens* MSRBB2.

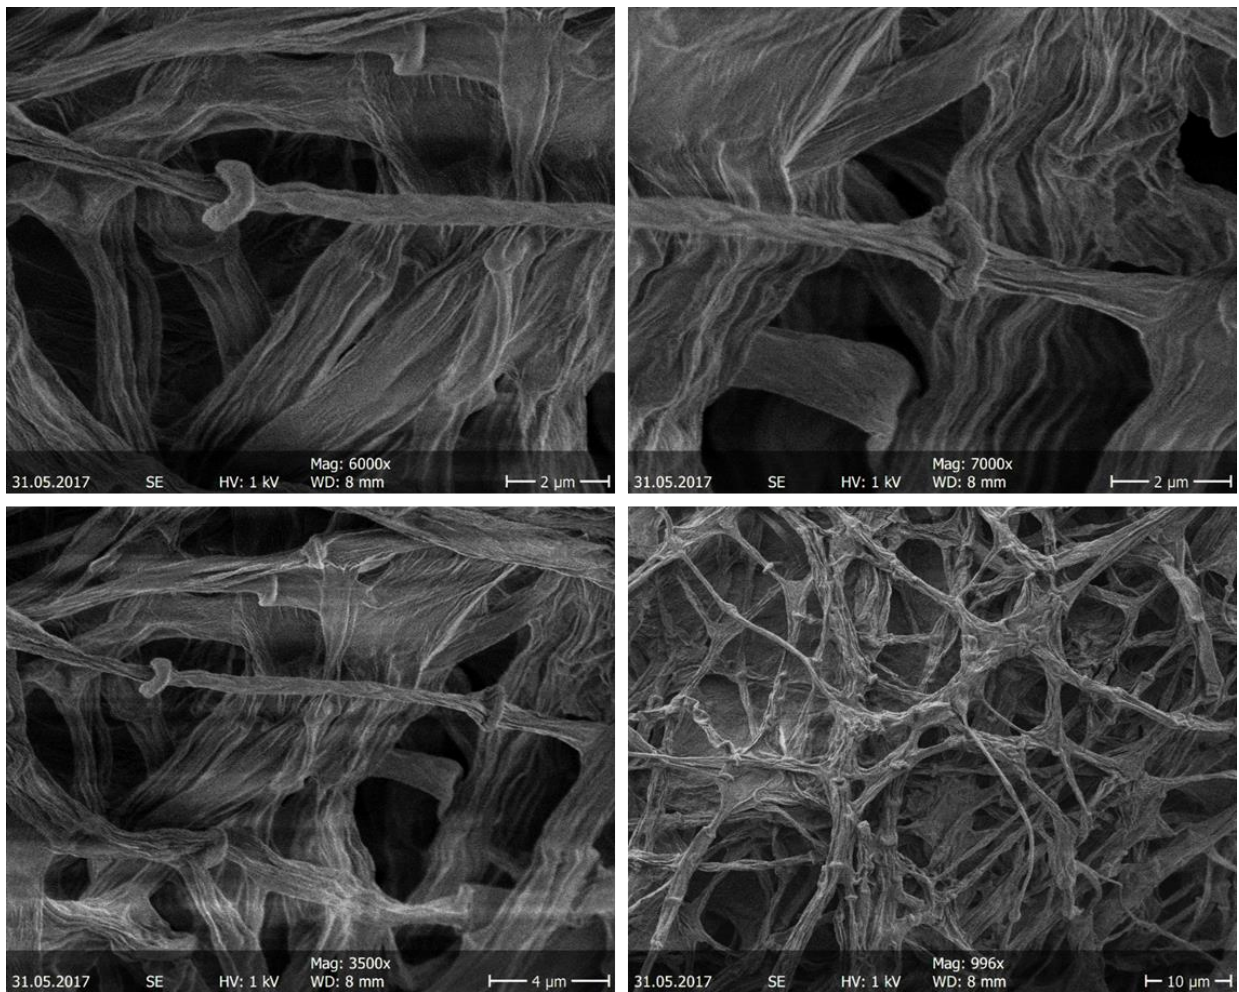



**Fig. S184.** Scanning electron microscopic images (2) of co-cultivation of endophytic *P. virgatula* and *S. marcescens* MSRBB2.

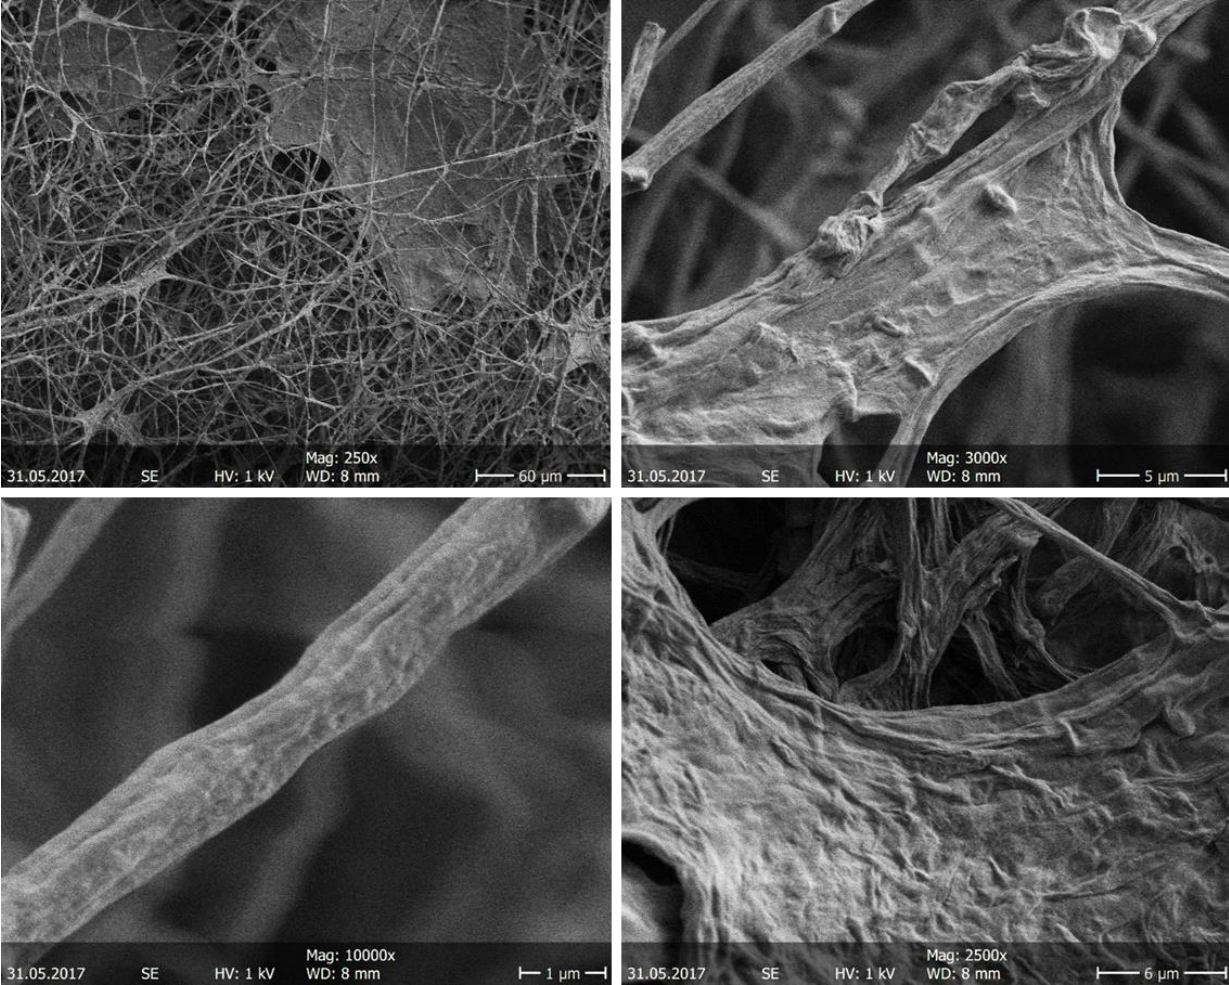

**Fig. S185.** Scanning electron microscopic images (3) of co-cultivation of endophytic *P. virgatula* and *S. marcescens* MSRBB2.

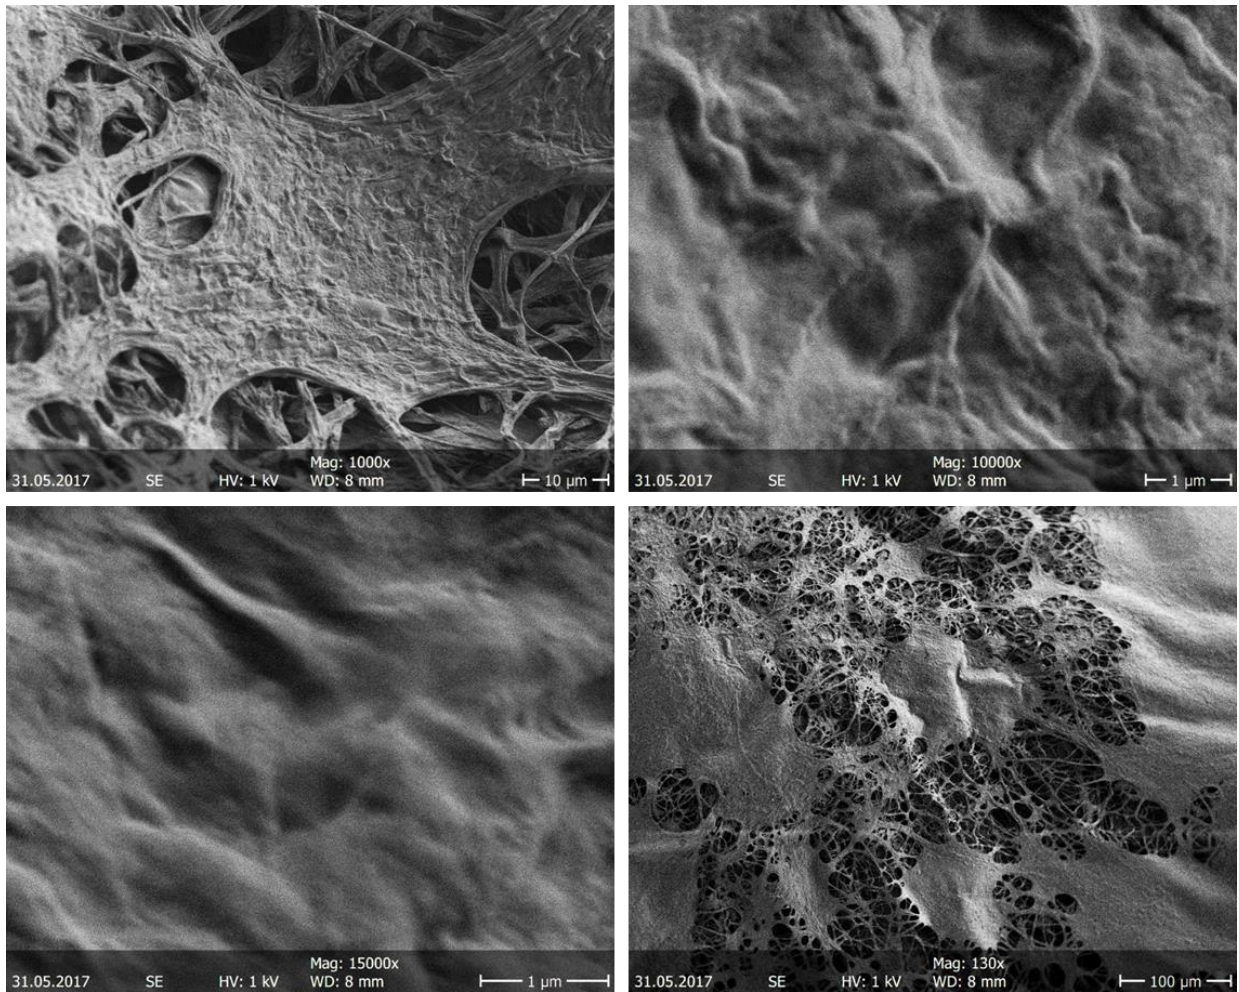

**Fig. S186.** Scanning electron microscopic images (1) of co-cultivation of endophytic *A. caesiellus* and *S. marcescens* MSRBB2.

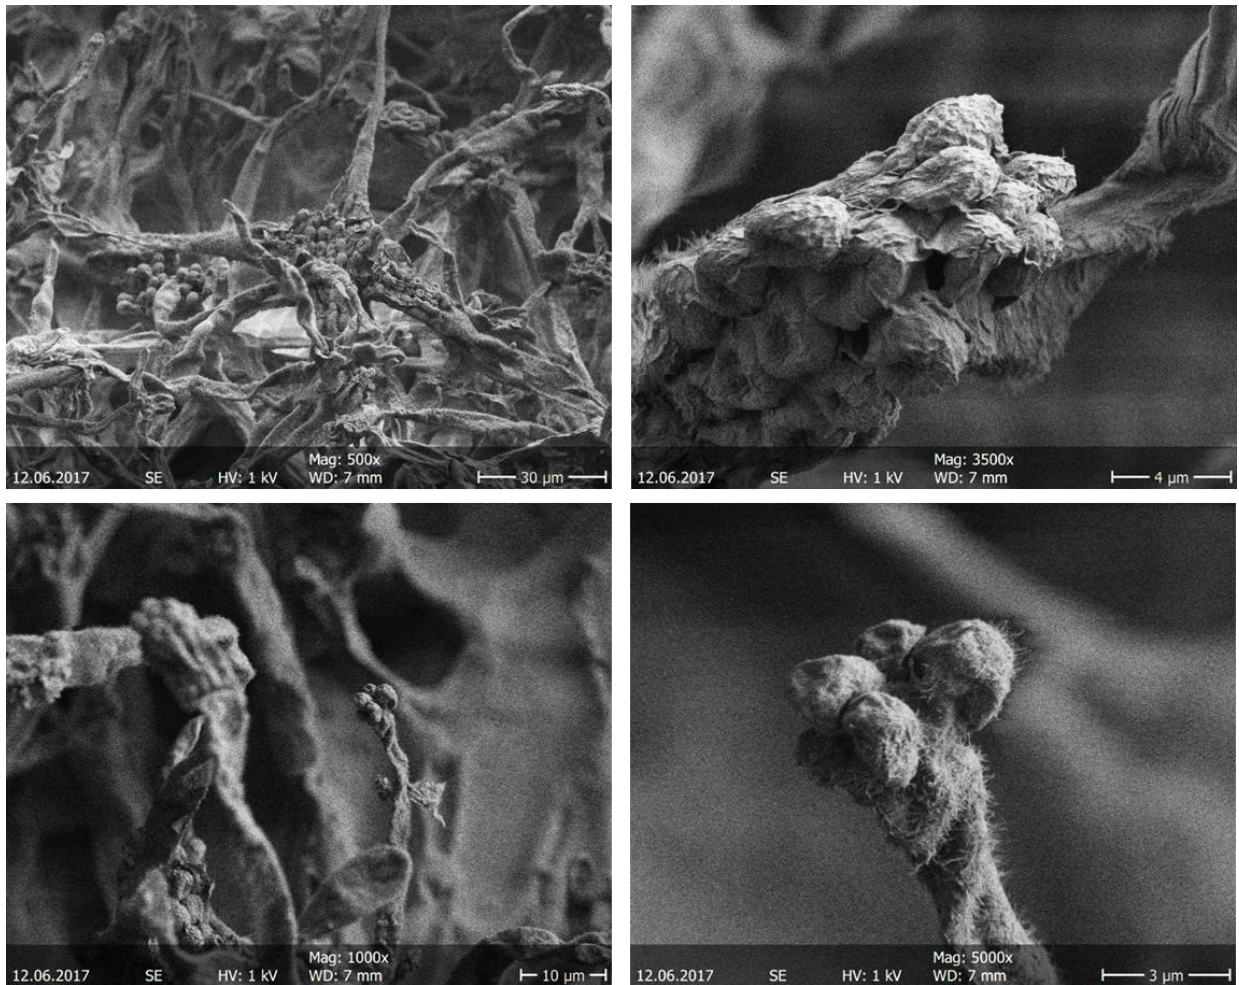

**Fig. S187.** Scanning electron microscopic images (2) of co-cultivation of endophytic *A. caesiellus* and *S. marcescens* MSRBB2.

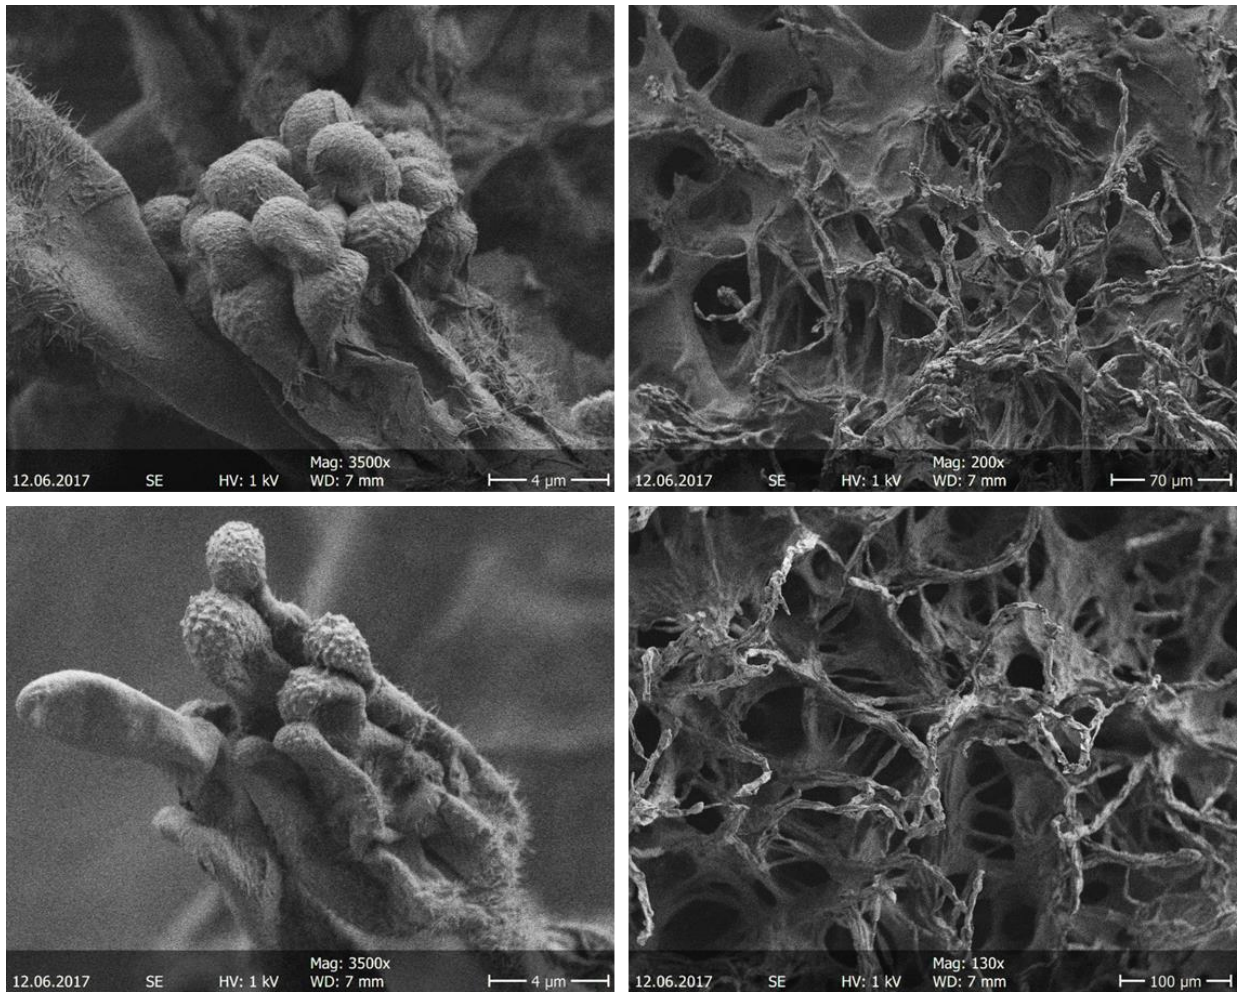

**Fig. S189.** Scanning electron microscopic images (3) of co-cultivation of endophytic *A. caesiellus* and *S. marcescens* MSRBB2.

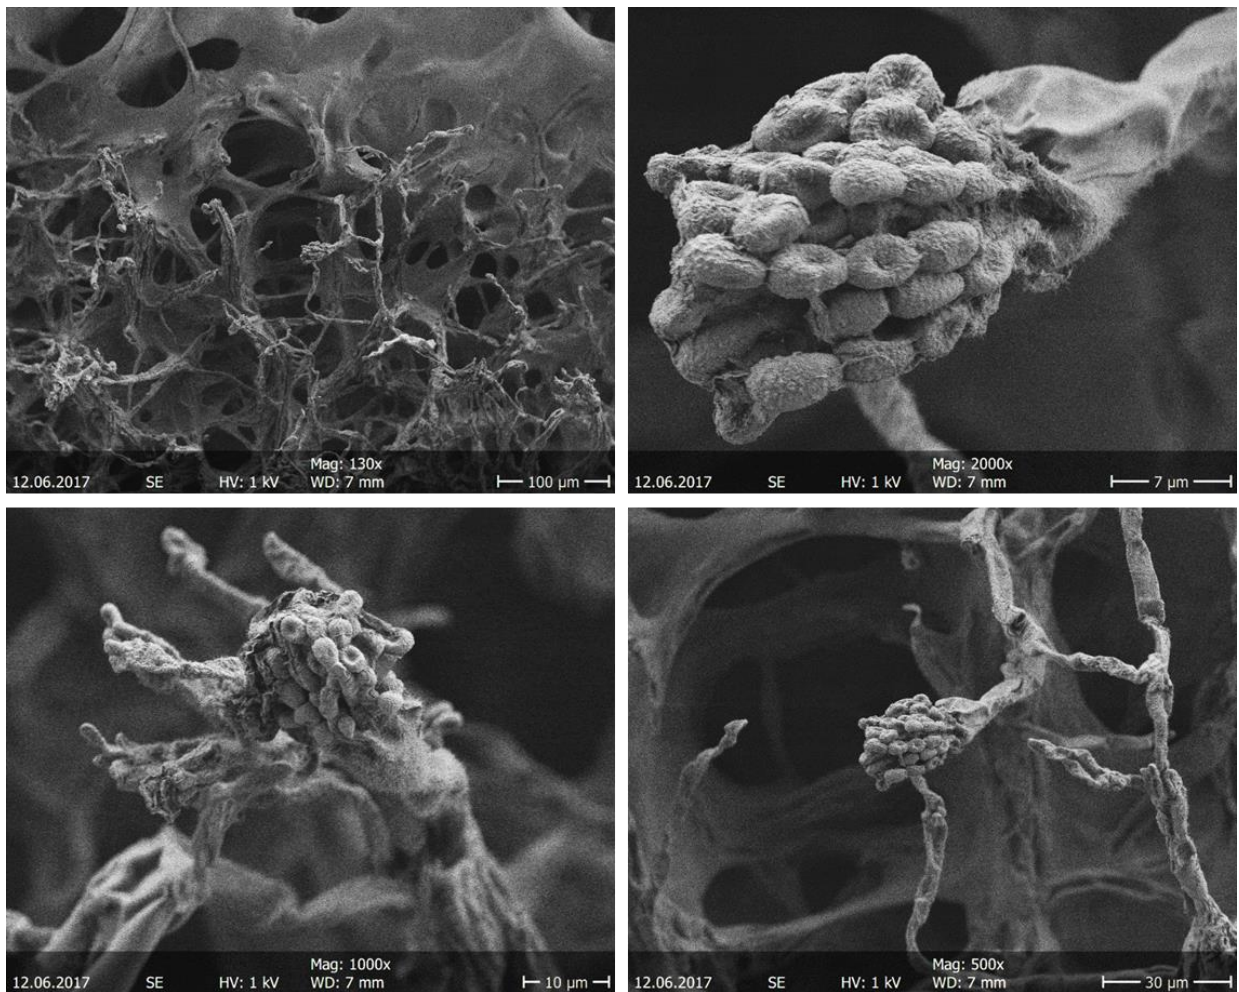

**Fig. S190.** Scanning electron microscopic images (1) of co-cultivation of endophytic *Pichia* spp. and *S. marcescens* MSRBB2.

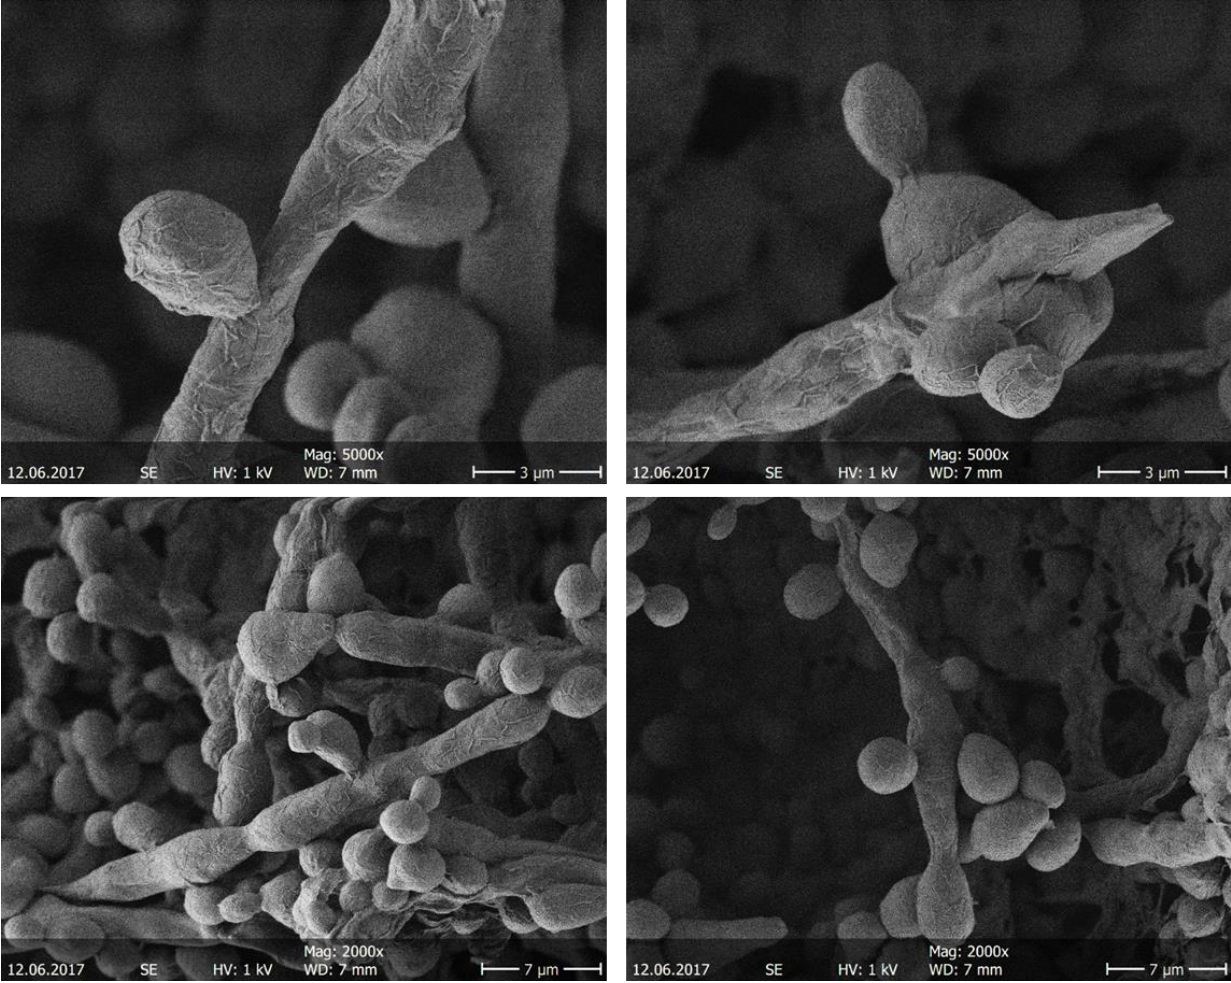

**Fig. S191.** Scanning electron microscopic images (2) of co-cultivation of endophytic *Pichia* spp. and *S. marcescens* MSRBB2.

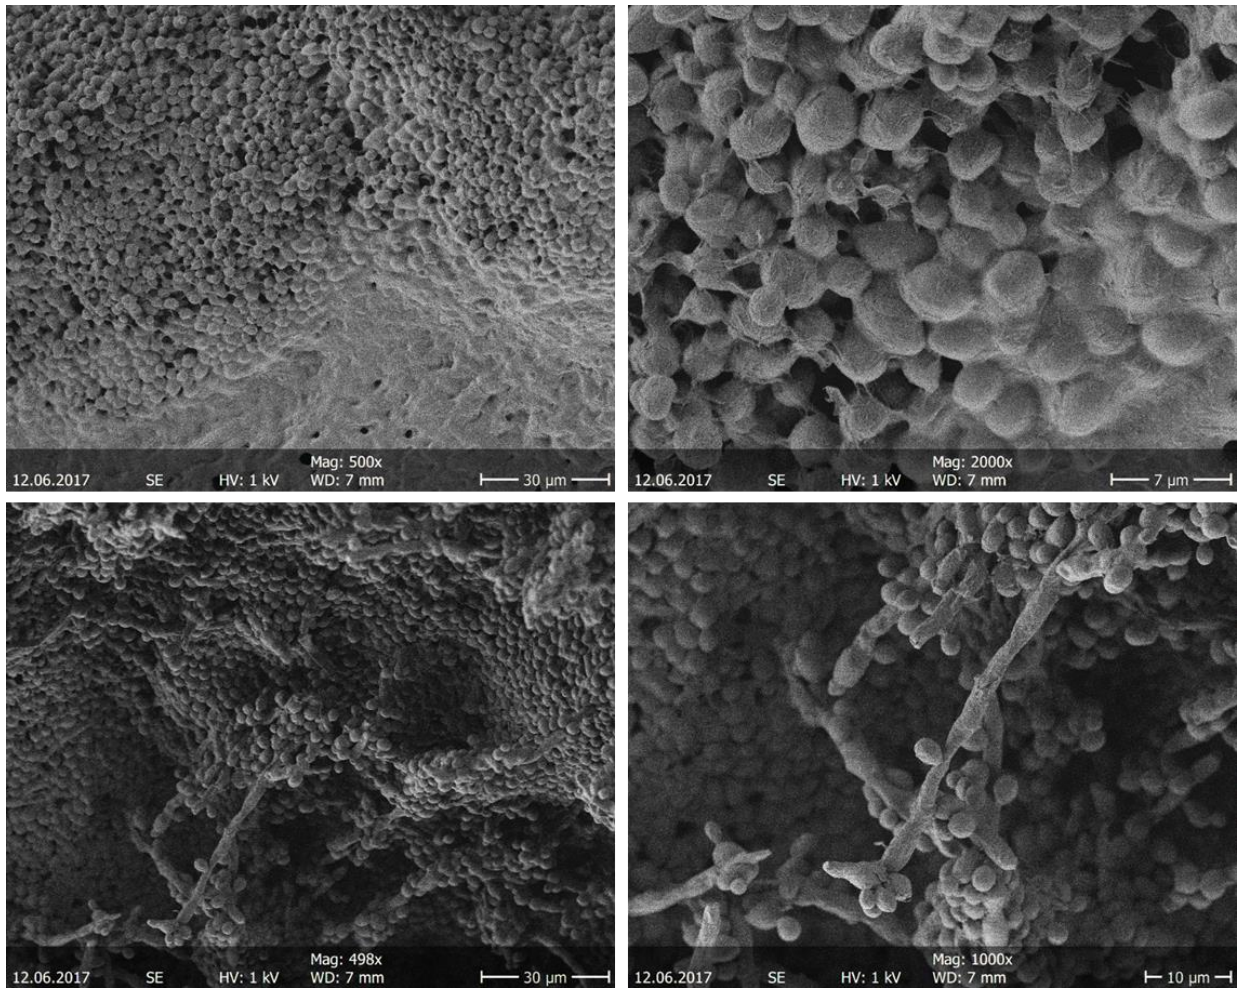

**Fig. S192.** Scanning electron microscopic images of *Aspergillus fumigatus* (DSM 21023).

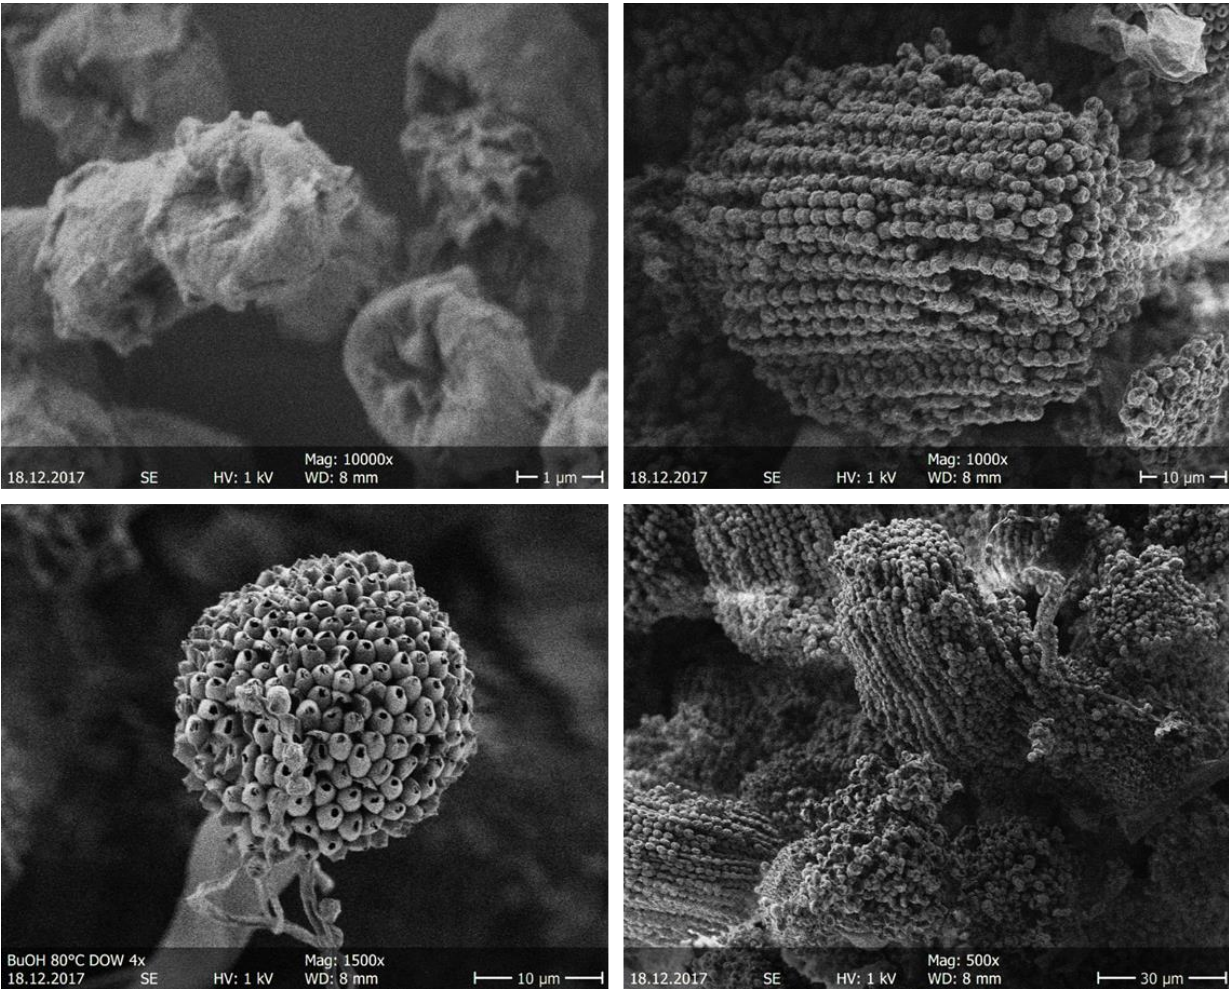



**Fig. S193.** Scanning electron microscopic images of co-cultivation of endophytic *S. marcescens* MSRBB2 and *Aspergillus fumigatus* (DSM 21023).

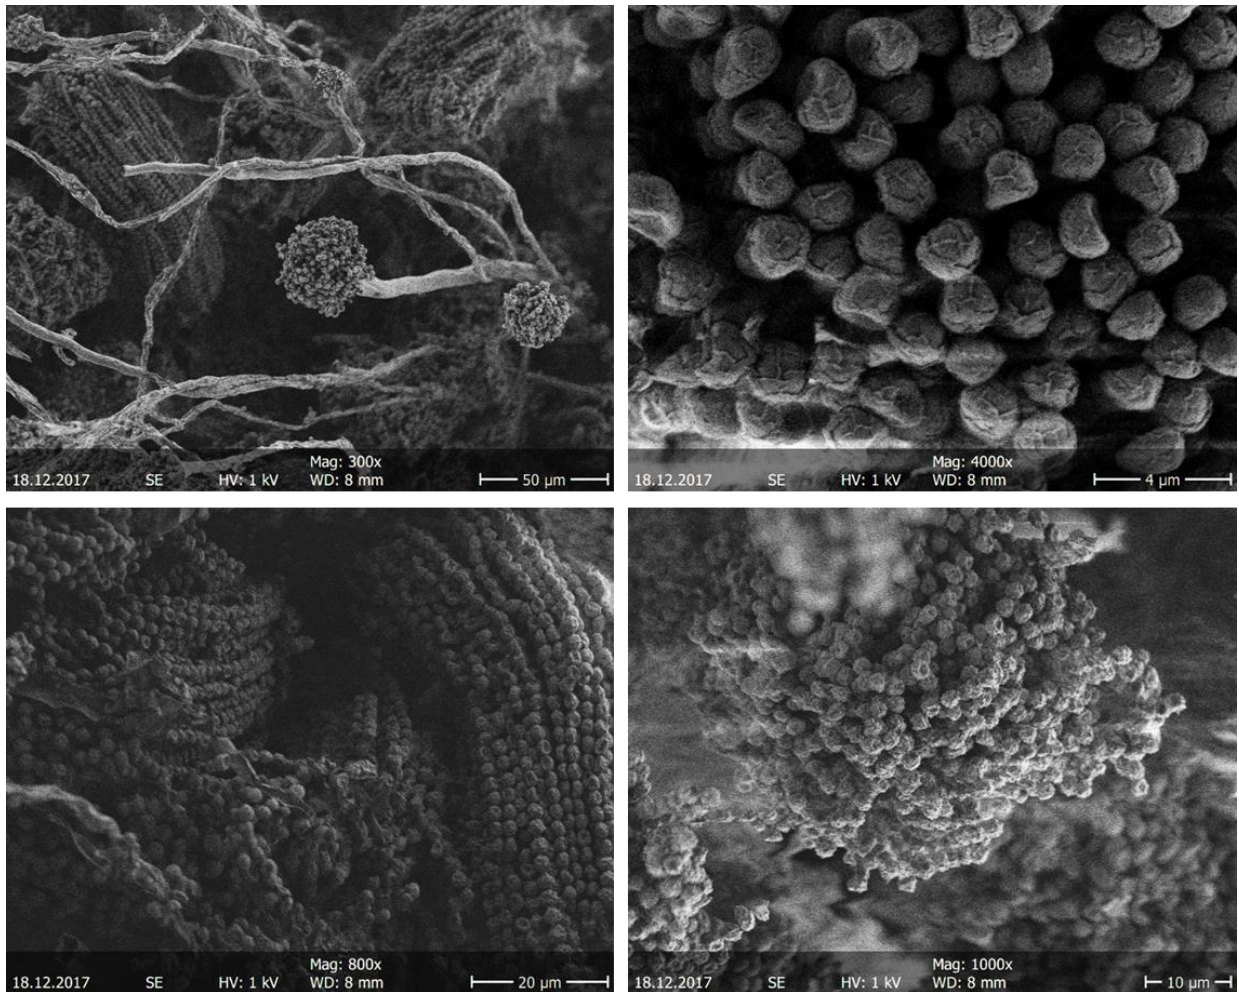

**Fig. S194.** Scanning electron microscopic images of *Pichia membranifaciens* (DSM 70366).

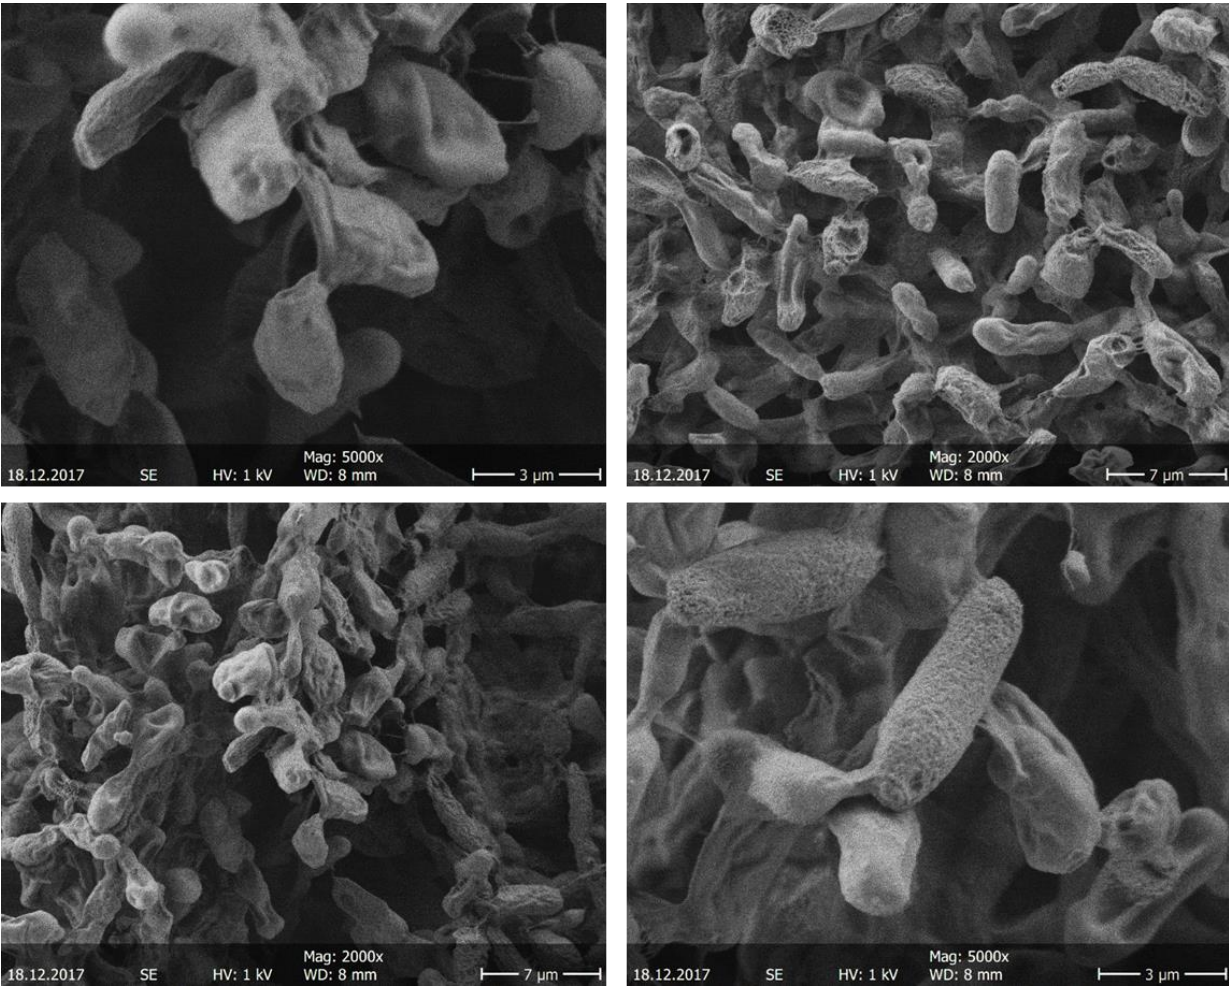

**Fig. S195.** Scanning electron microscopic images of co-cultivation of endophytic *S. marcescens* MSRBB2 and *Pichia membranifaciens* (DSM 70366).

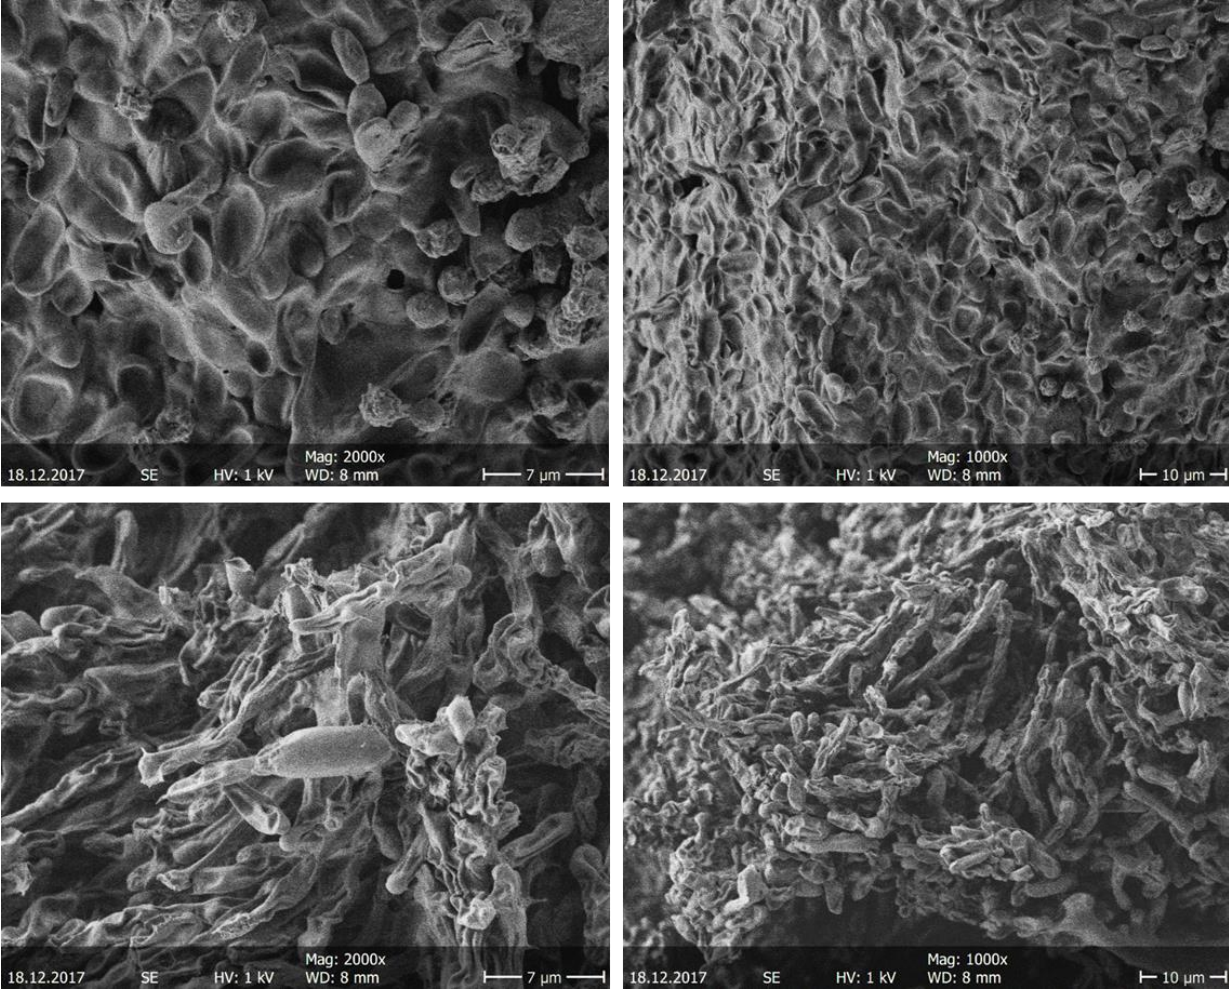

**Fig. S196.** Scanning electron microscopic images of *Pestalotiopsis versicolor* (DSM 62887).

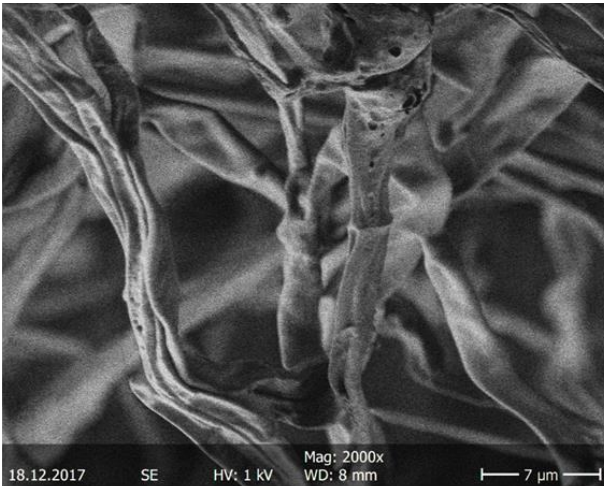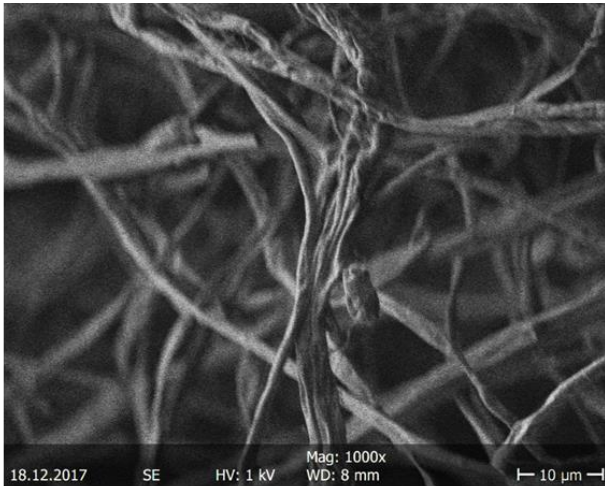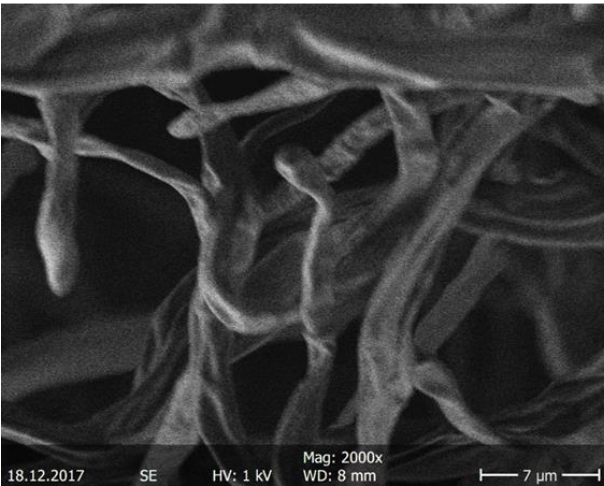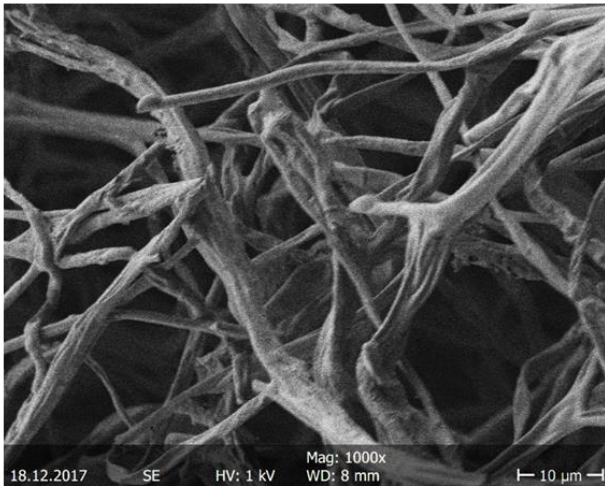

**Fig. S197.** Scanning electron microscopic images of co-cultivation of endophytic *S. marcescens* MSRBB2 and *Pestalotiopsis versicolor* (DSM 62887).

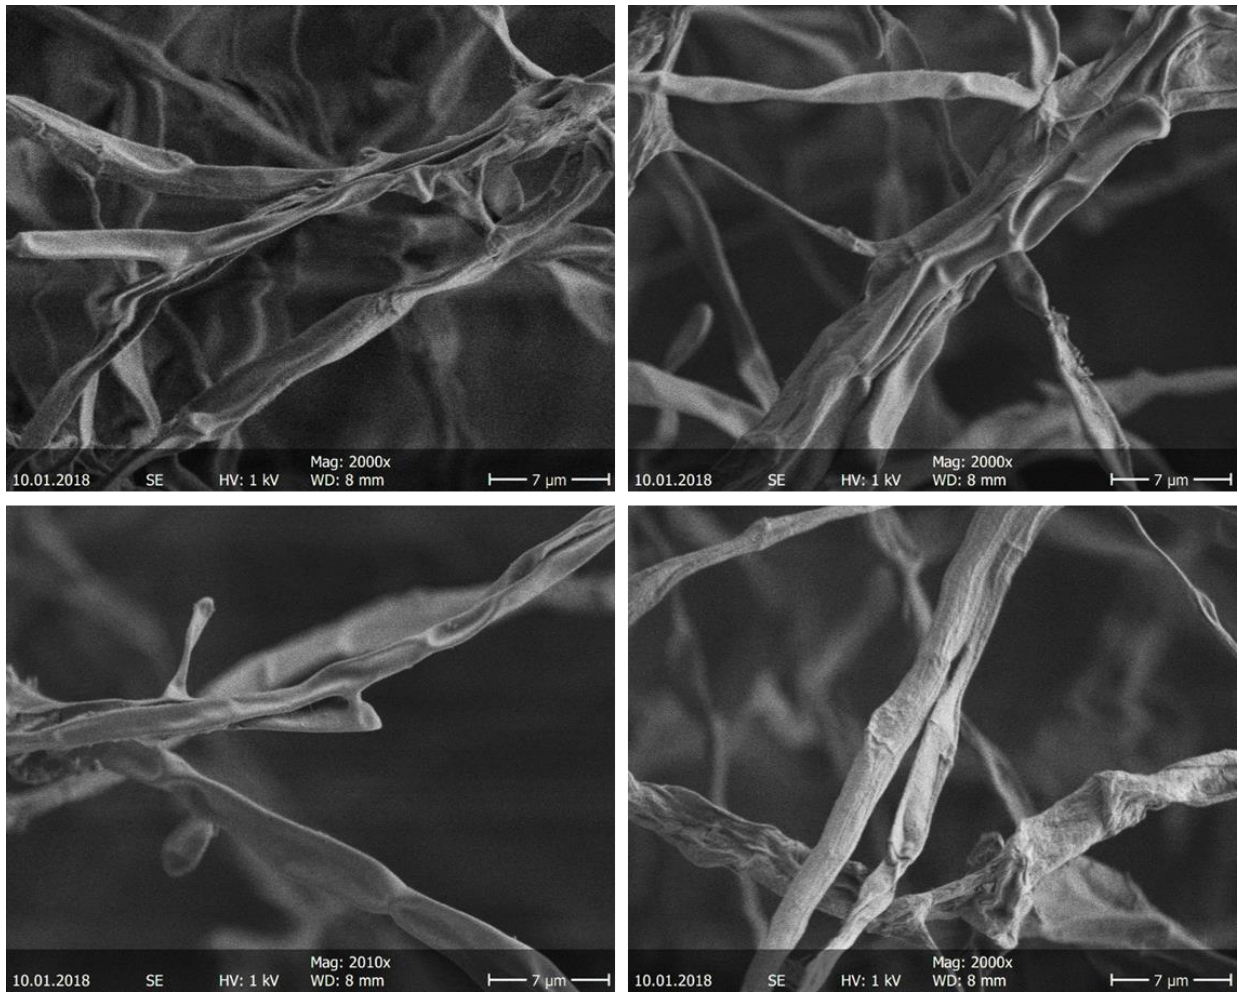

**Fig. S198.** Dose and time dependent disc line assay of different prodigiosin concentrations against *A. caesiellus*

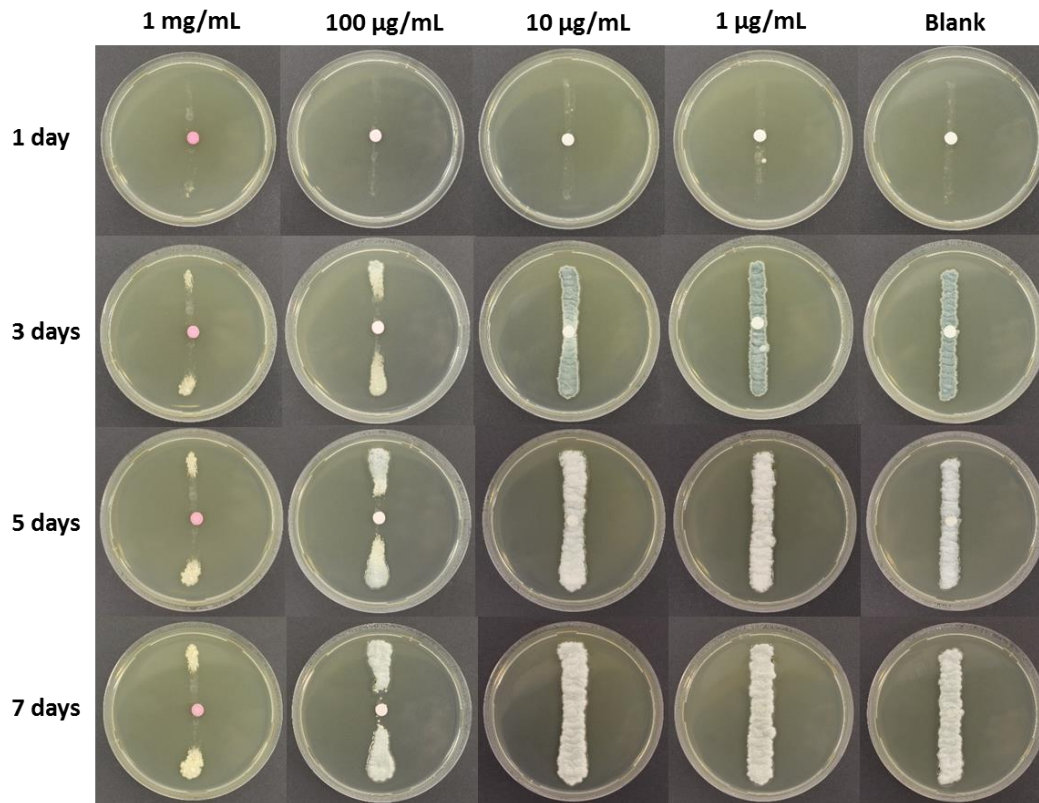

**Fig. S199.** Dose and time dependent Y-shape disc assay of different prodigiosin concentrations against *A. caesiellus*

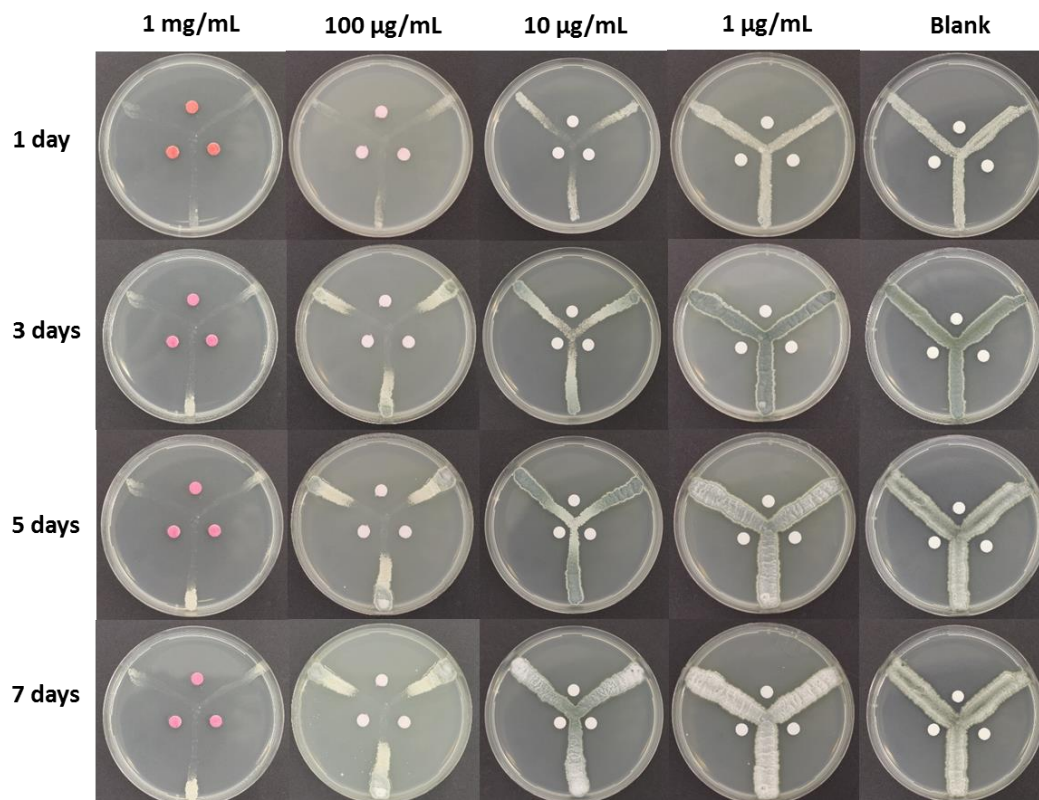

**Fig. S200.** Dose and time dependent disc line assay of different prodigiosin concentrations against *Pichia* spp.

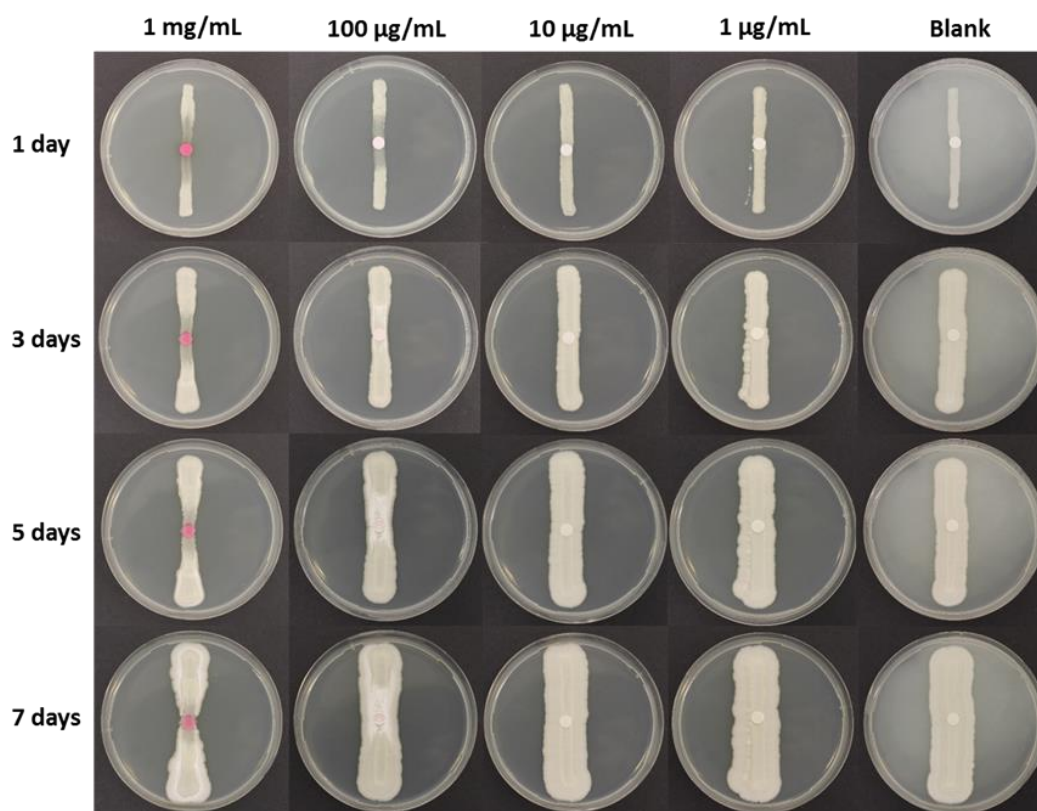

**Fig. S201.** Dose and time dependent Y-shape disc assay of different prodigiosin concentrations against *Pichia* spp.

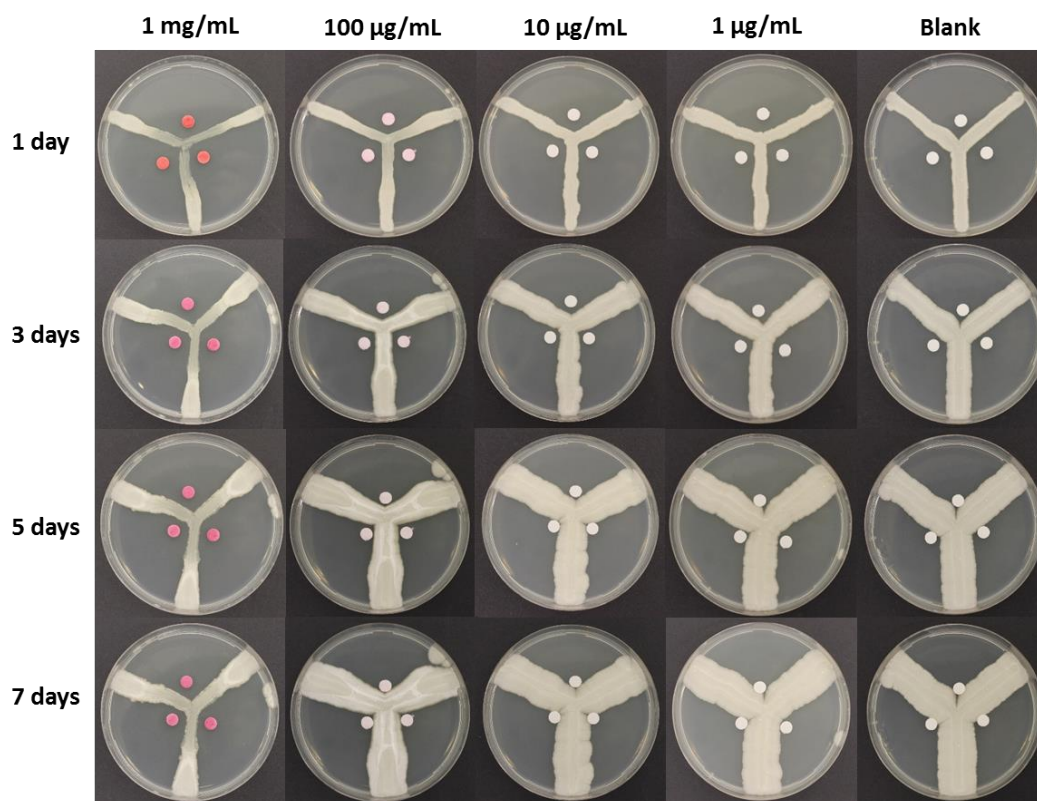

**Fig. S202.** Dose and time dependent disc line assay of different prodigiosin concentrations against *P. virgatula*

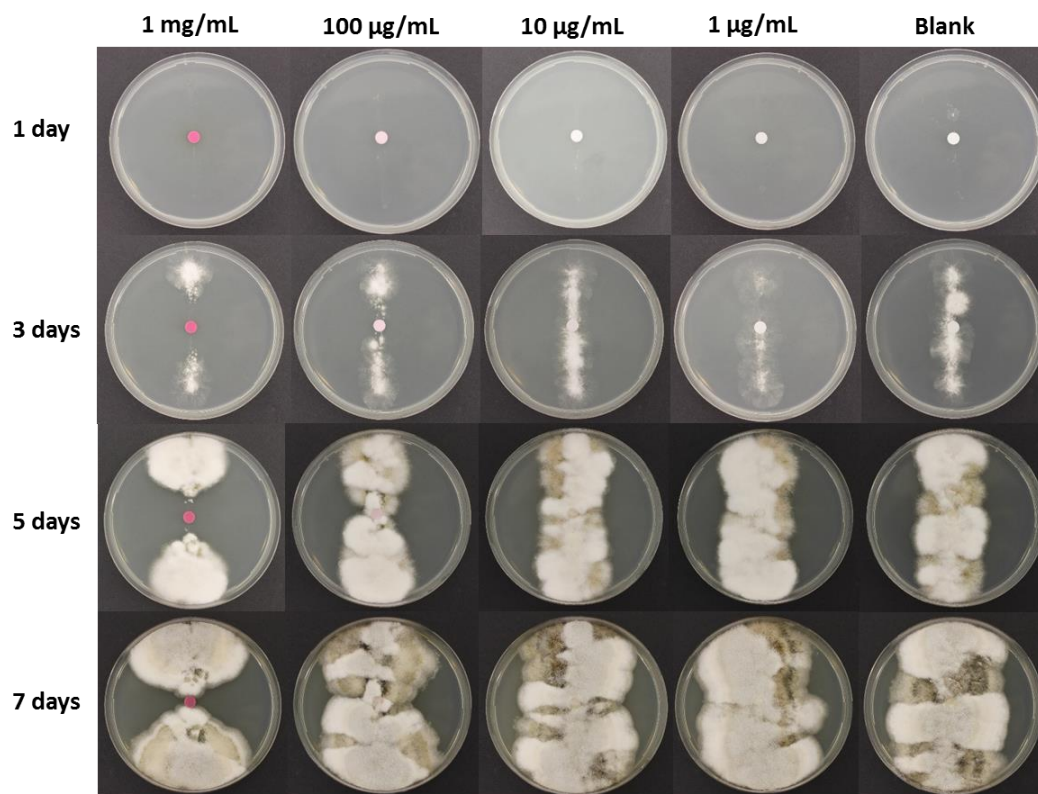

**Fig. S203.** Dose and time dependent Y-shape disc assay of different prodigiosin concentrations against *P. virgatula*

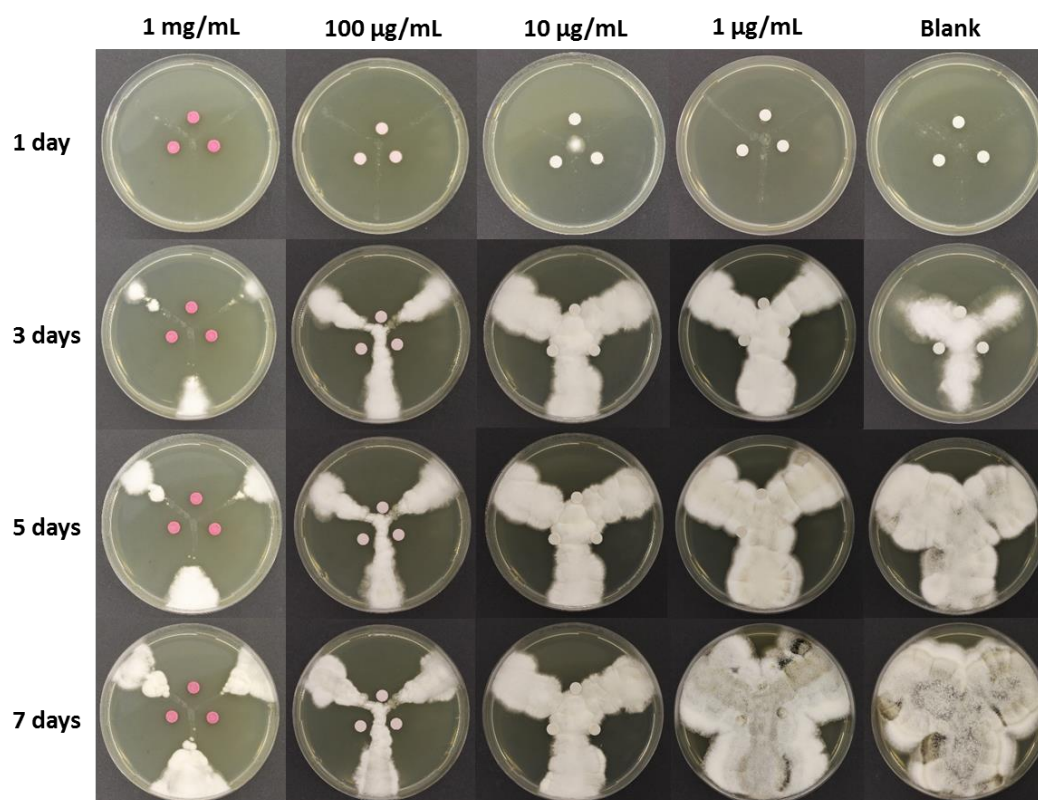



**Fig. S204.** *S. marcescens* MSRBB2 on chitinase detection agar incubated at 30 °C and monitored for 14 days. Chitinase detection media<sup>1</sup> (A) showing degradation of chitin by chitinase enzymes resulting in pH change and color change of Bromocresol purple dye. Chitinase detection media with supplemented glucose (20 g/L, B) showing no chitinase enzyme expression. Glucose is inhibiting chitinase expression.

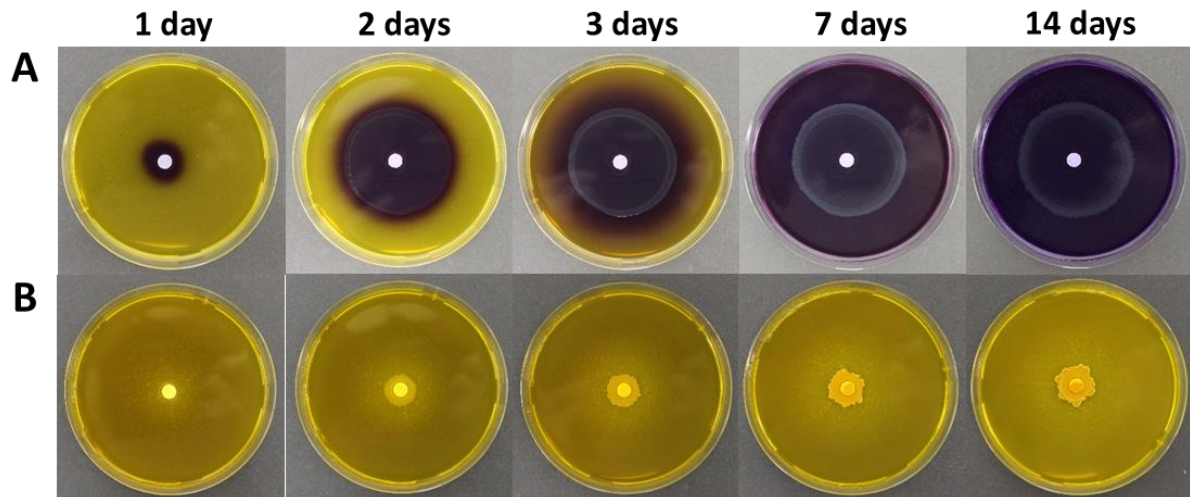

**Fig. S205.** Digital microscope images with different magnifications of the colonization of endophytic *A. caesiellus* by *S. marcescens* MSRBB2. Hyphae of the fungus is overgrown with *S. marcescens* MSRBB2 colonies.

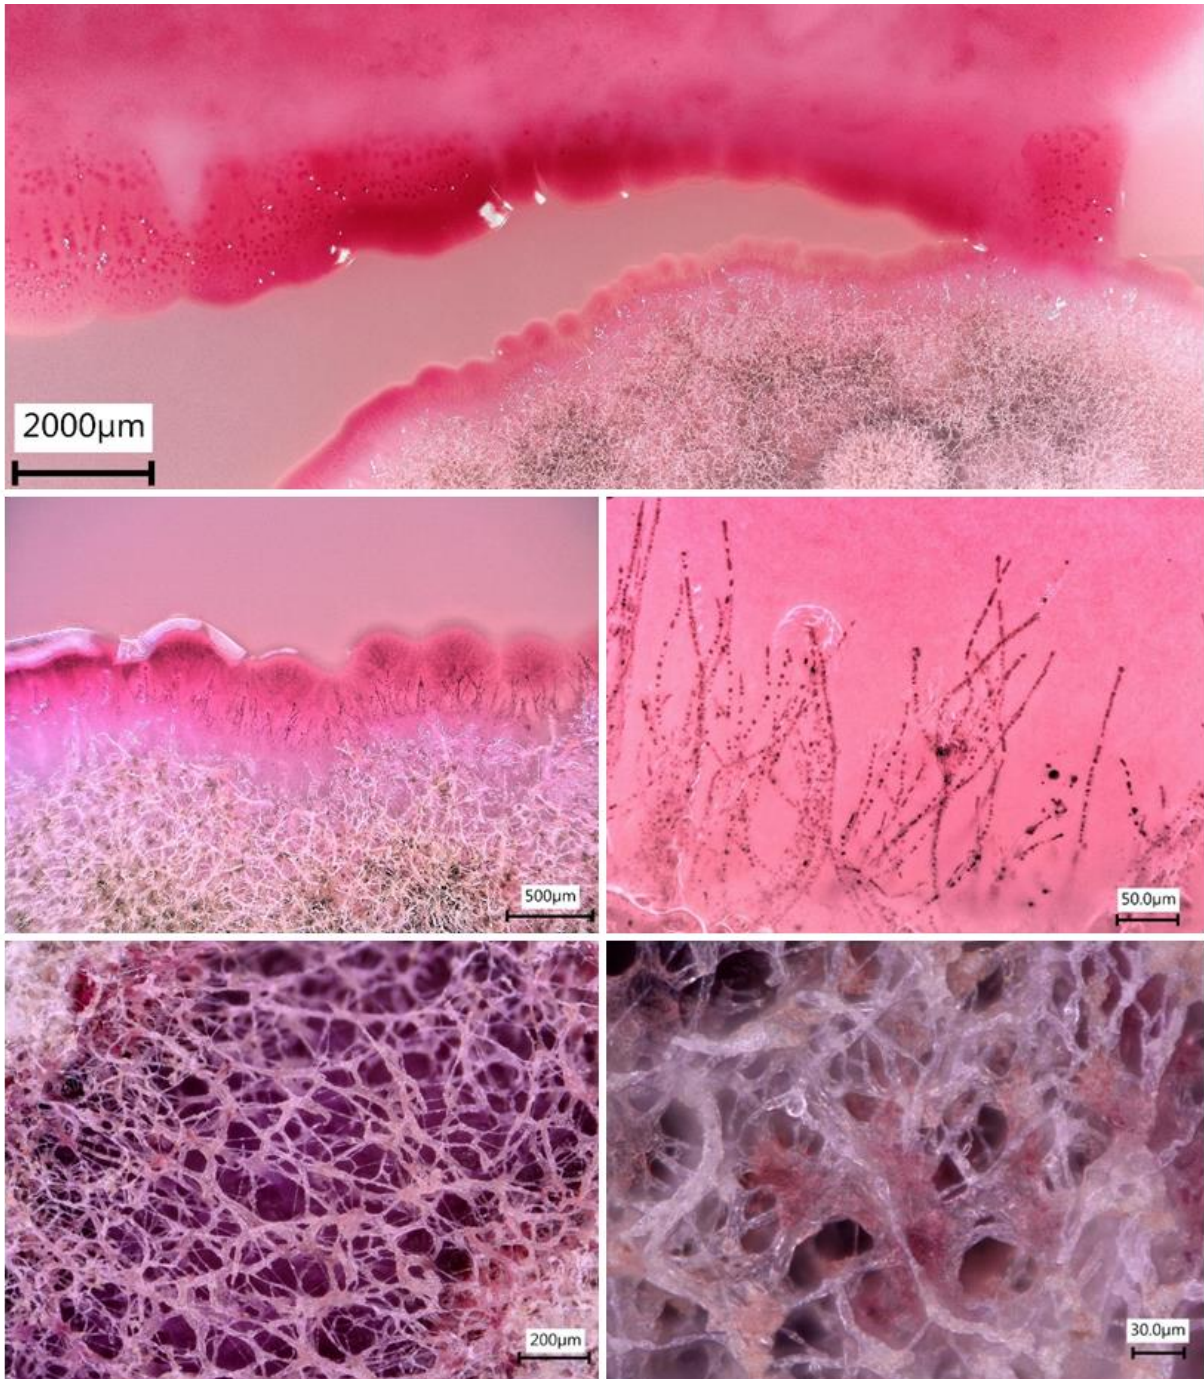

**Fig. S206.** MALDI-imaging-HRMS of the co-cultivation of bacterial endophyte *S. marcescens* MSRBB2 and fungal endophyte *A. caesiellus* after 3 days. Optical image with assigned scan area and localization of prodiginines ( $[M+H]^+ \pm 2$  ppm, (A)). Different fragments of MALDI-imaging-HRMS<sup>2</sup> of prodigiosin (B).

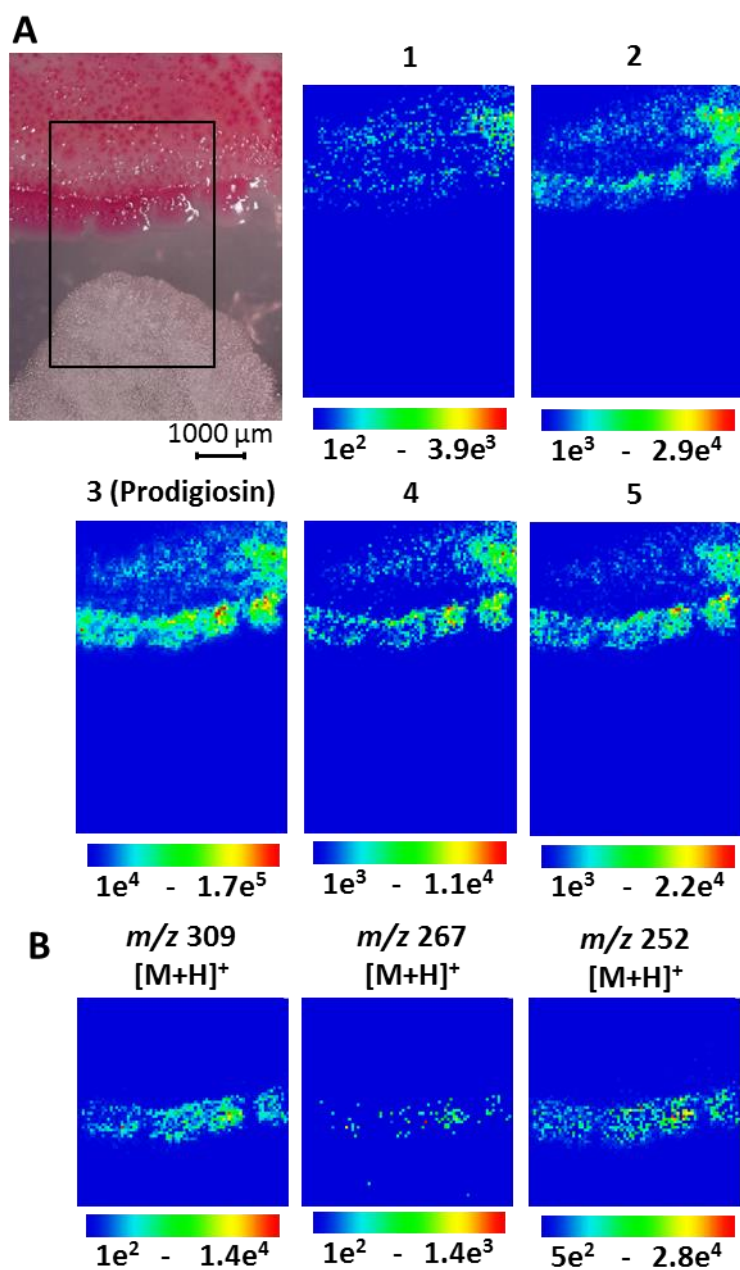

**Fig. S207.** MALDI-imaging-HRMS of the co-cultivation of bacterial endophyte *S. marcescens* MSRBB2 and fungal endophyte *A. caesiellus* after 3 days. Optical image with assigned scan area and localization of prodiginines ( $[M+H]^+ \pm 2$  ppm).

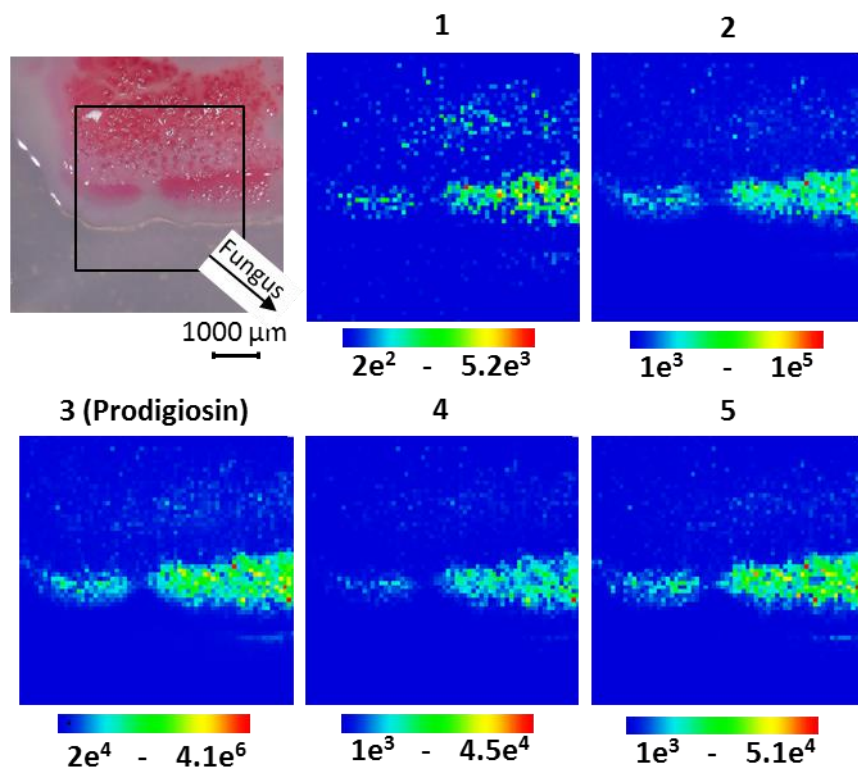

**Fig. S208.** MALDI-imaging-HRMS of the co-cultivation of bacterial endophyte *S. marcescens* MSRBB2 and fungal endophyte *A. caesiellus* after 5 days. Optical image with assigned scan area and localization of prodiginines ( $[M+H]^+ \pm 2$  ppm).

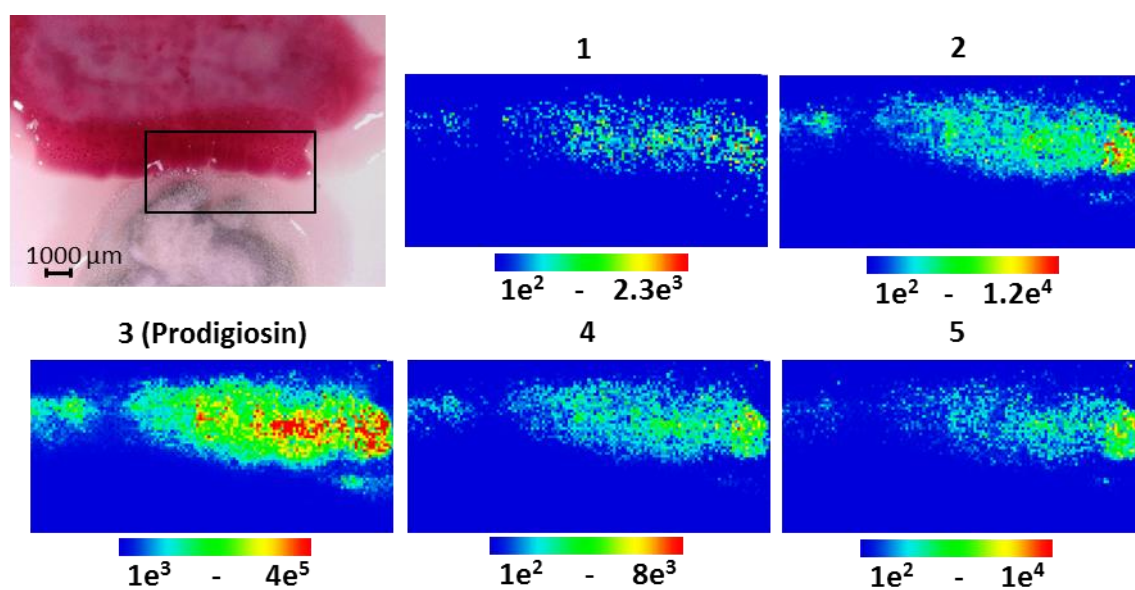

**Fig. S209.** MALDI-imaging-HRMS of the co-cultivation of bacterial endophyte *S. marcescens* MSRBB2 and fungal endophyte *A. caesiellus* after 7 days. Optical image with assigned scan area and localization of prodiginines ( $[M+H]^+ \pm 2$  ppm, (A)). Different fragments of MALDI-imaging-HRMS<sup>2</sup> of prodigiosin (B).

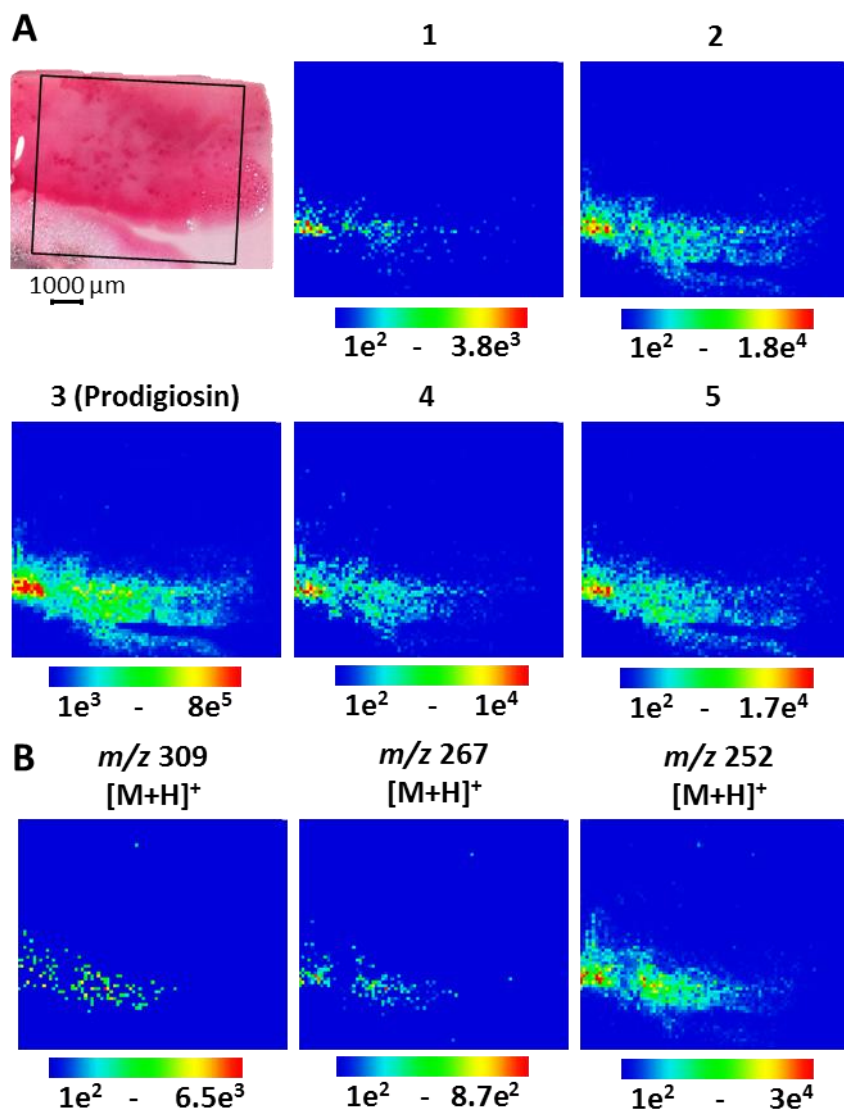

**Fig. S210.** MALDI-imaging-HRMS of the co-cultivation of bacterial endophyte *S. marcescens* MSRBB2 and fungal endophyte *A. caesiellus* after 7 days. Optical image with assigned scan area and localization of prodiginines ( $[M+H]^+ \pm 2$  ppm, (A)). Different fragments of MALDI-imaging-HRMS<sup>2</sup> of prodigiosin (B).

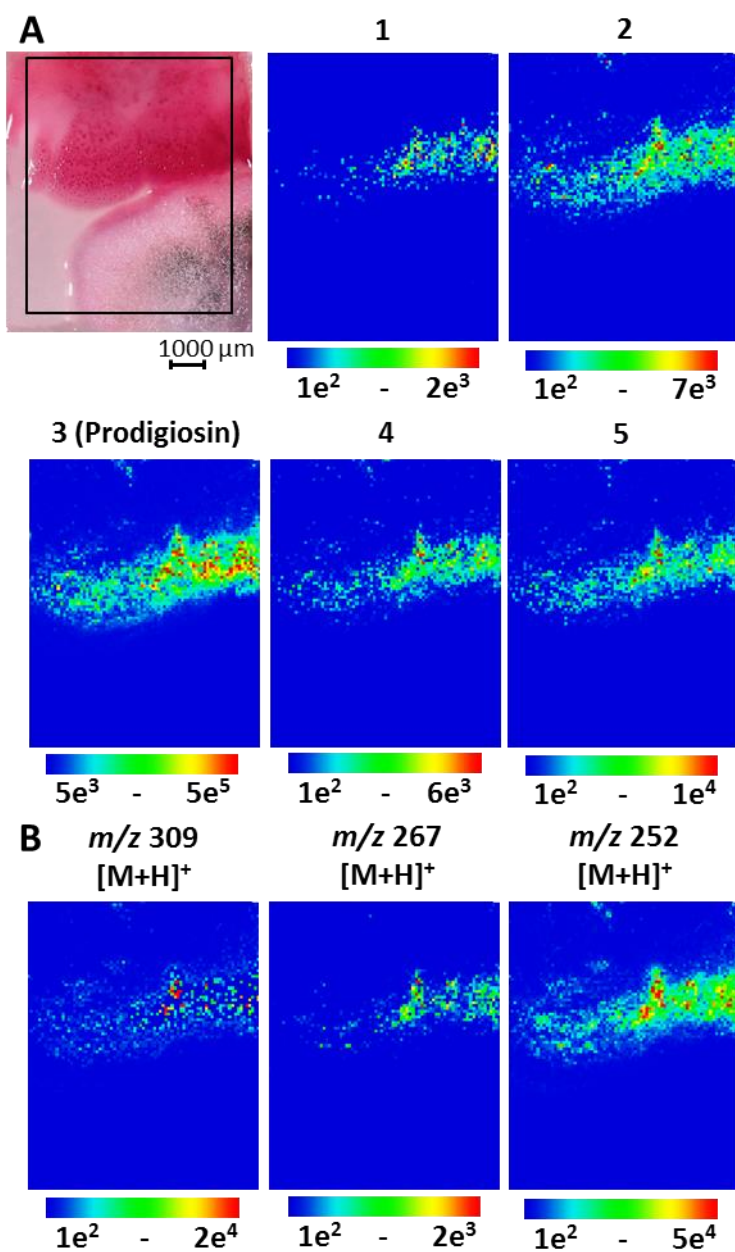

**Fig. S211.** Images of solo cultivation of endophytic *S. marcescens* MSRBB2 (Control).

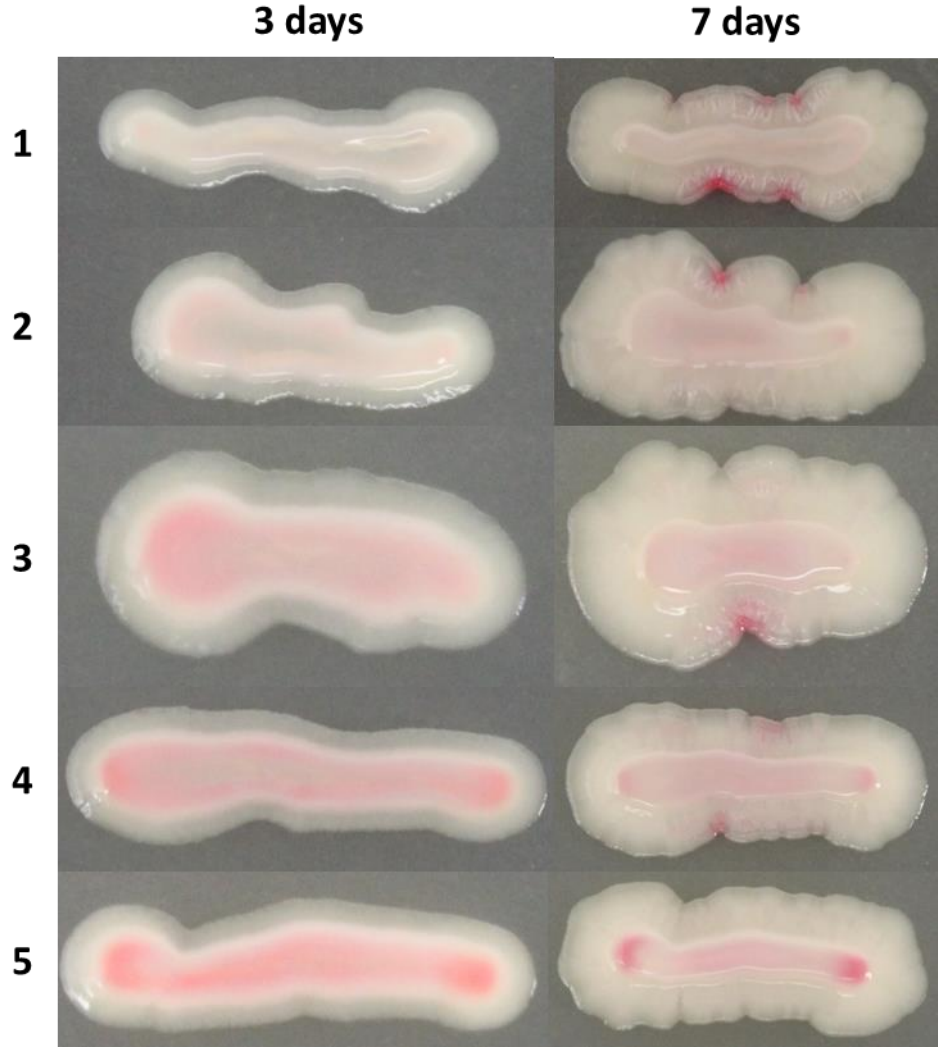

**Fig. S212.** MALDI-imaging-HRMS of solo cultivation of bacterial endophyte *S. marcescens* MSRBB2 after 7 days. Optical image with assigned scan area and localization of prodiginines **1-5** ( $[M+H]^+ \pm 2$  ppm).

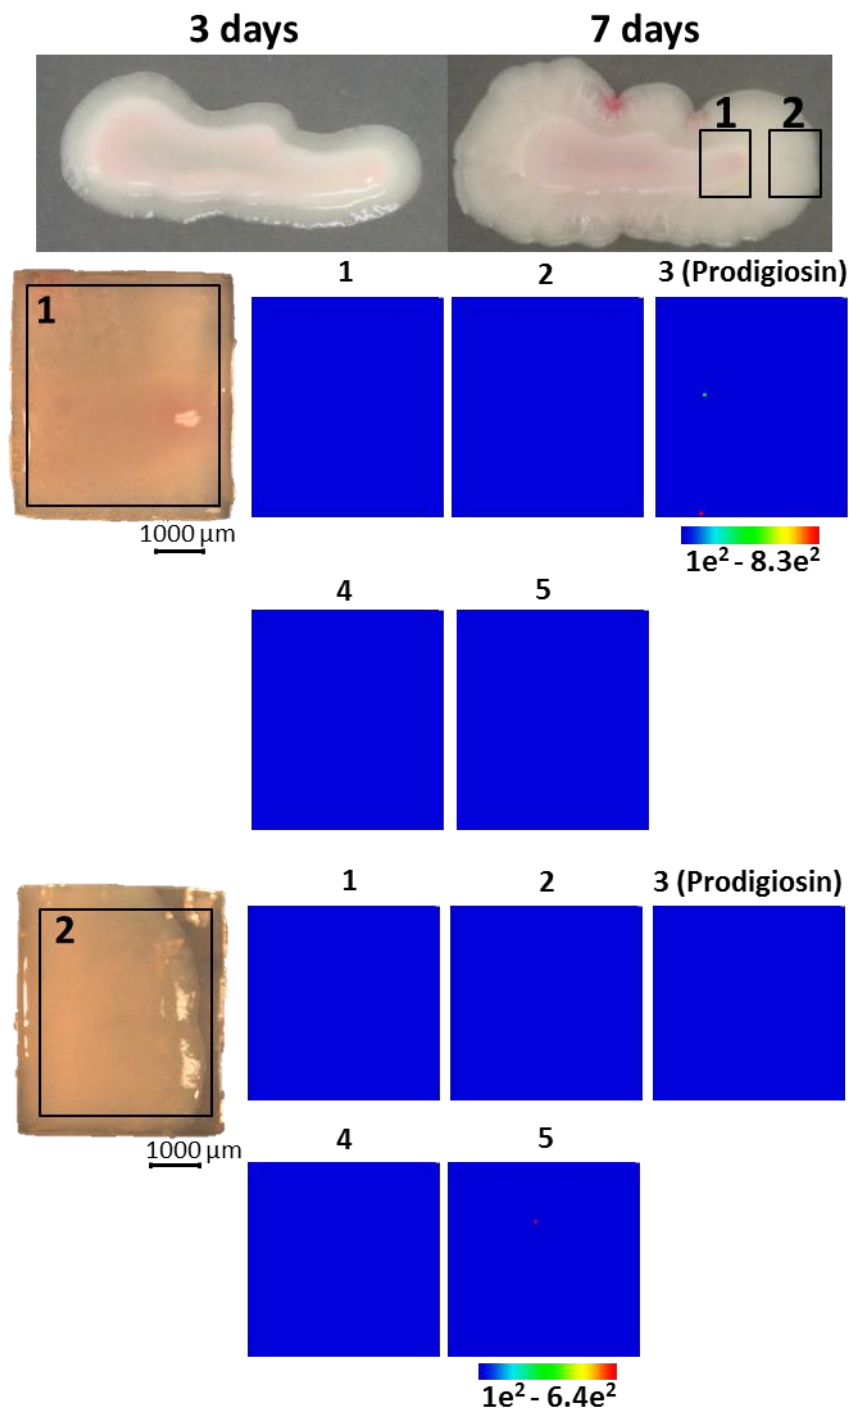



**Fig. S213.** HPLC-HRMS comparison of prodigiosin (Extracted ion chromatograms,  $[M+H]^+ \pm 2$  ppm) production by endophytic *S. marcescens* MSRBB2 of mono-cultivation and co-cultivations with fungal endophytes *A. caesiellus* and *Pichia* spp. (five Petri dishes) after 7 days incubation (30°C).

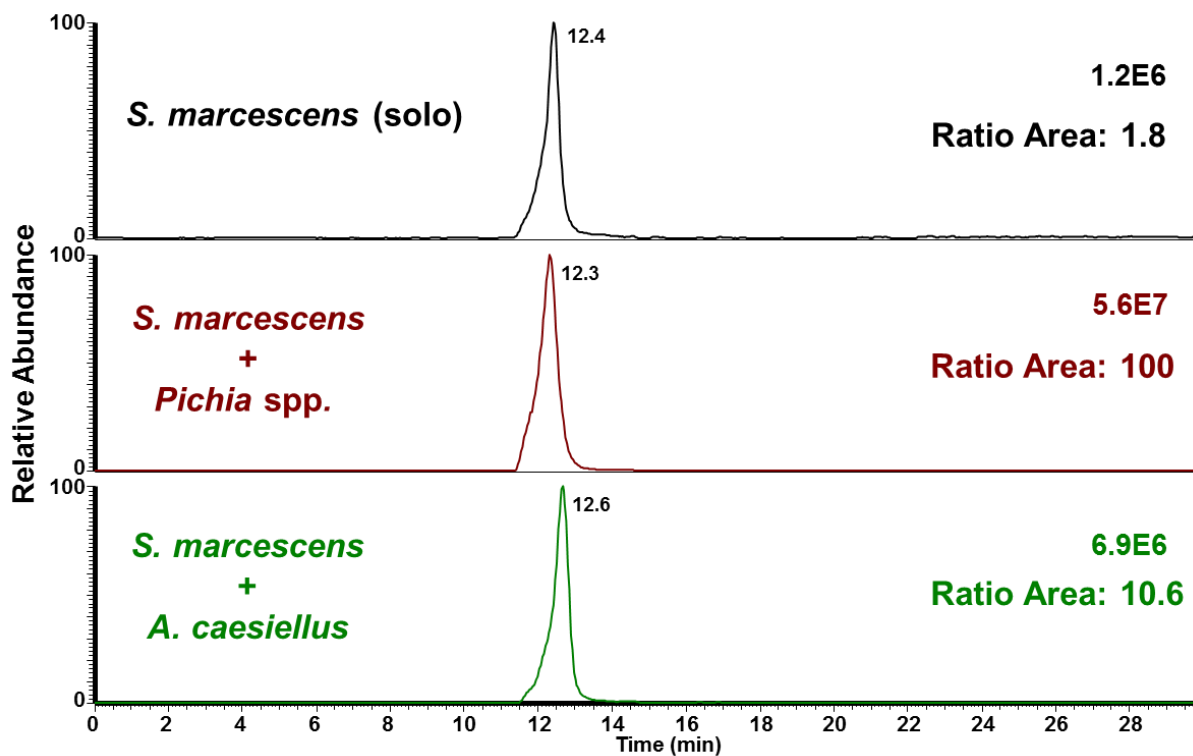

**Fig. S214.** HPLC-HRMS of extracts of bacterial endophyte *S. marcescens* MSRBB2 incubated at 30°C and 37°C for 24h, optical images of incubated nutrient agar Petri dishes, and extracted ion chromatograms of serrawettin w1 ( $[M+H]^+ \pm 2$  ppm) (A) Enlarged microscopic images (B).

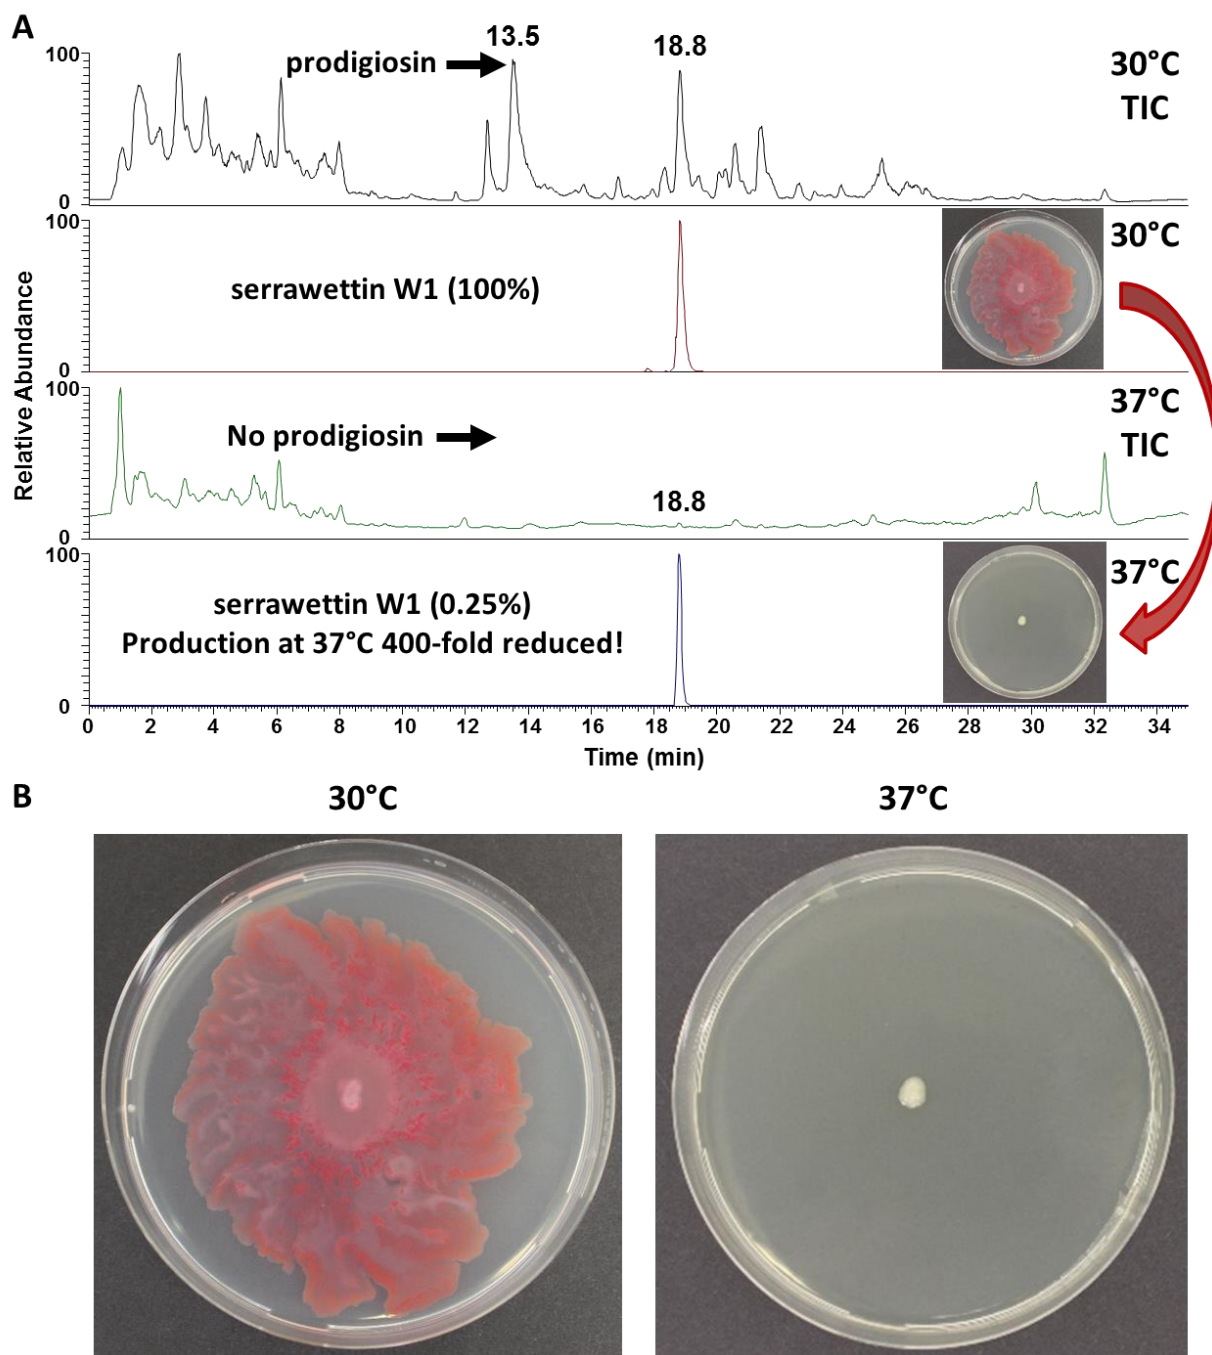

**Fig. S215.** MALDI-imaging-HRMS of the co-cultivation of bacterial endophyte *S. marcescens* MSRBB2 and fungal endophyte *A. caesiellus* after 3 days. Optical image with assigned scan area and localization of serratamolides ( $[M+K]^+ \pm 2$  ppm).

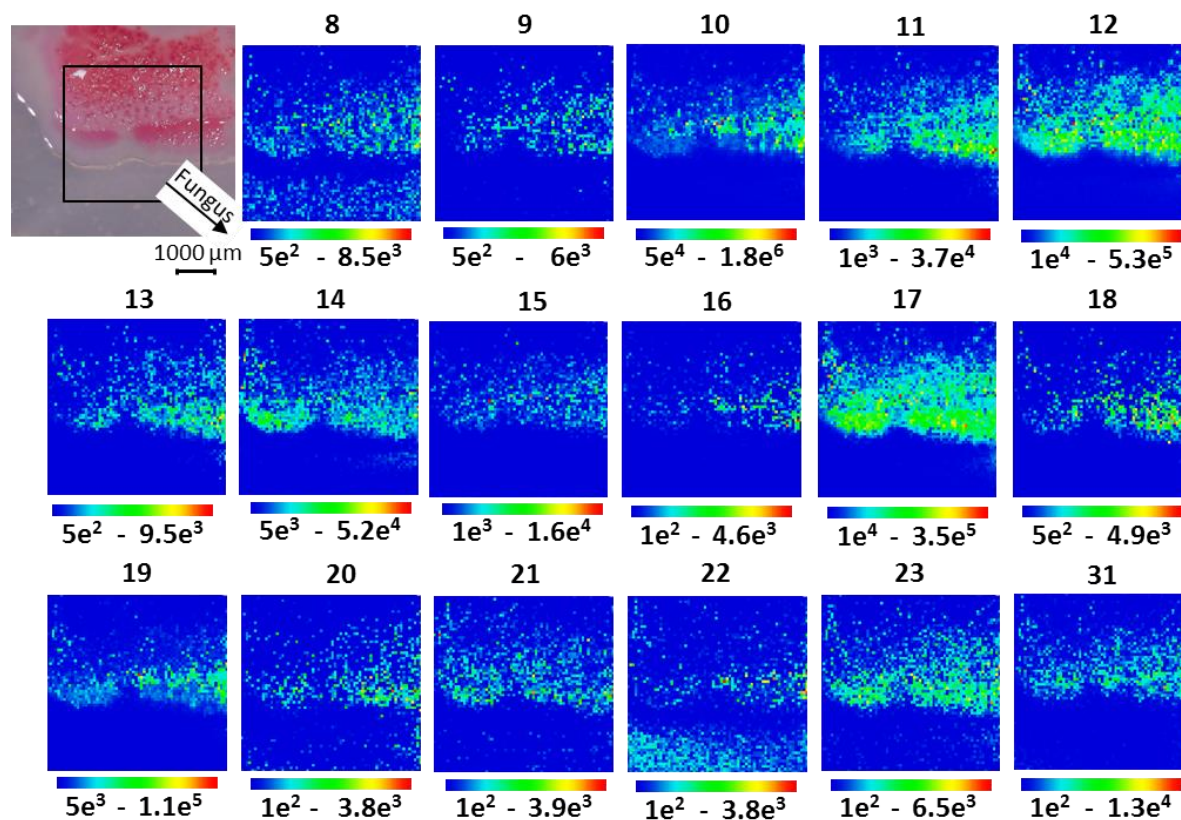

**Fig. S216.** MALDI-imaging-HRMS of the co-cultivation of bacterial endophyte *S. marcescens* MSRBB2 and fungal endophyte *A. caesiellus* after 5 days. Optical image with assigned scan area and localization of serratamolides ( $[M+K]^+ \pm 2$  ppm).

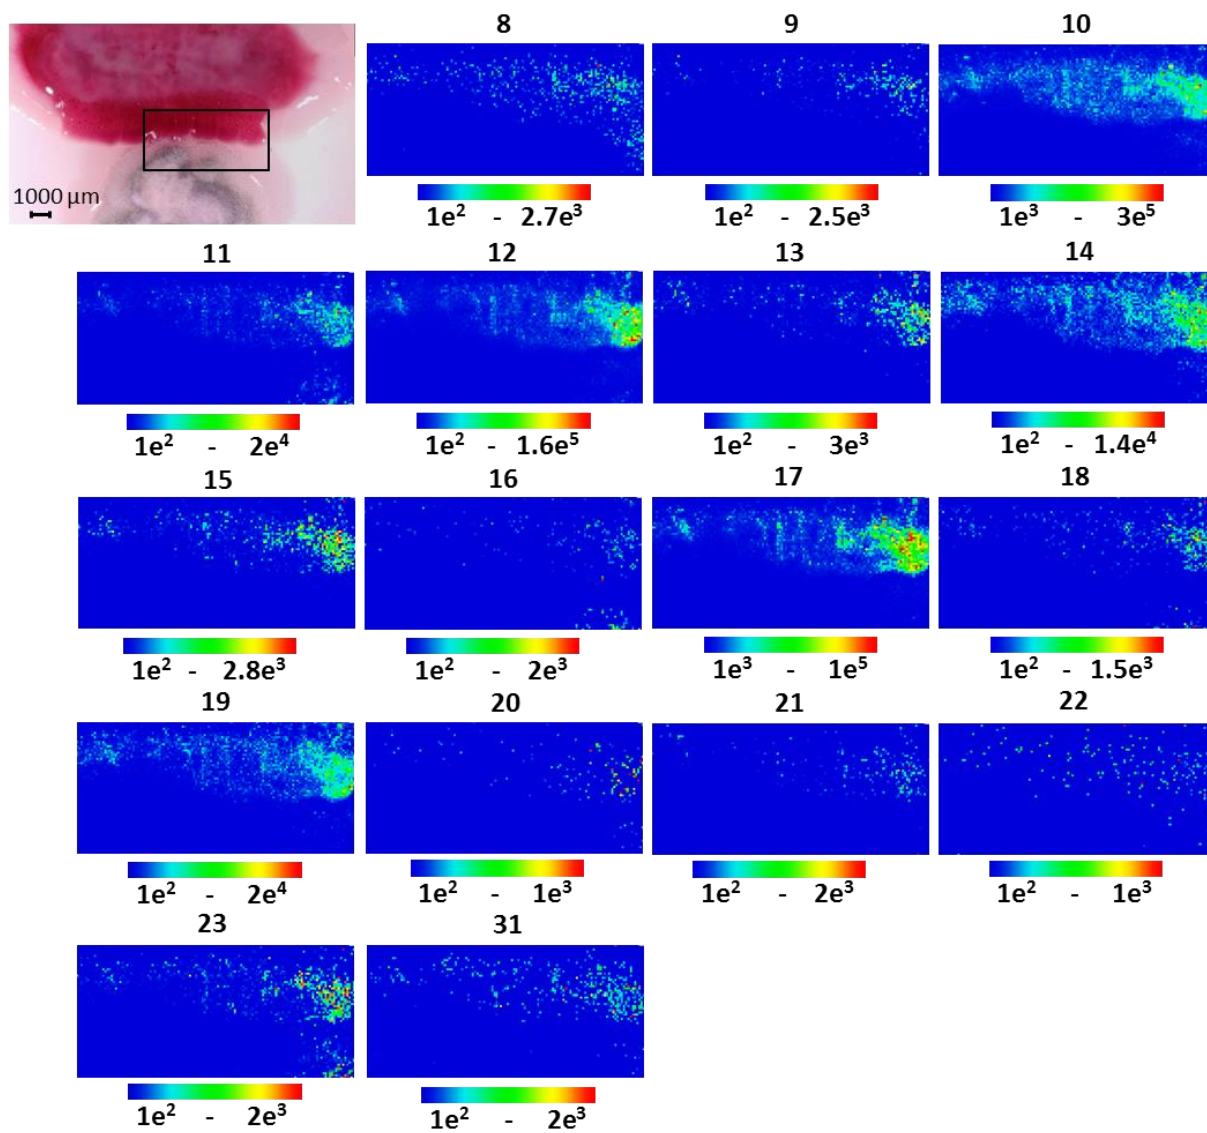

**Fig. S217.** MALDI-imaging-HRMS of the co-cultivation of bacterial endophyte *S. marcescens* MSRBB2 and fungal endophyte *A. caesiellus* after 7 days. Optical image with assigned scan area and localization of serratamolides ( $[M+K]^+ \pm 2$  ppm).

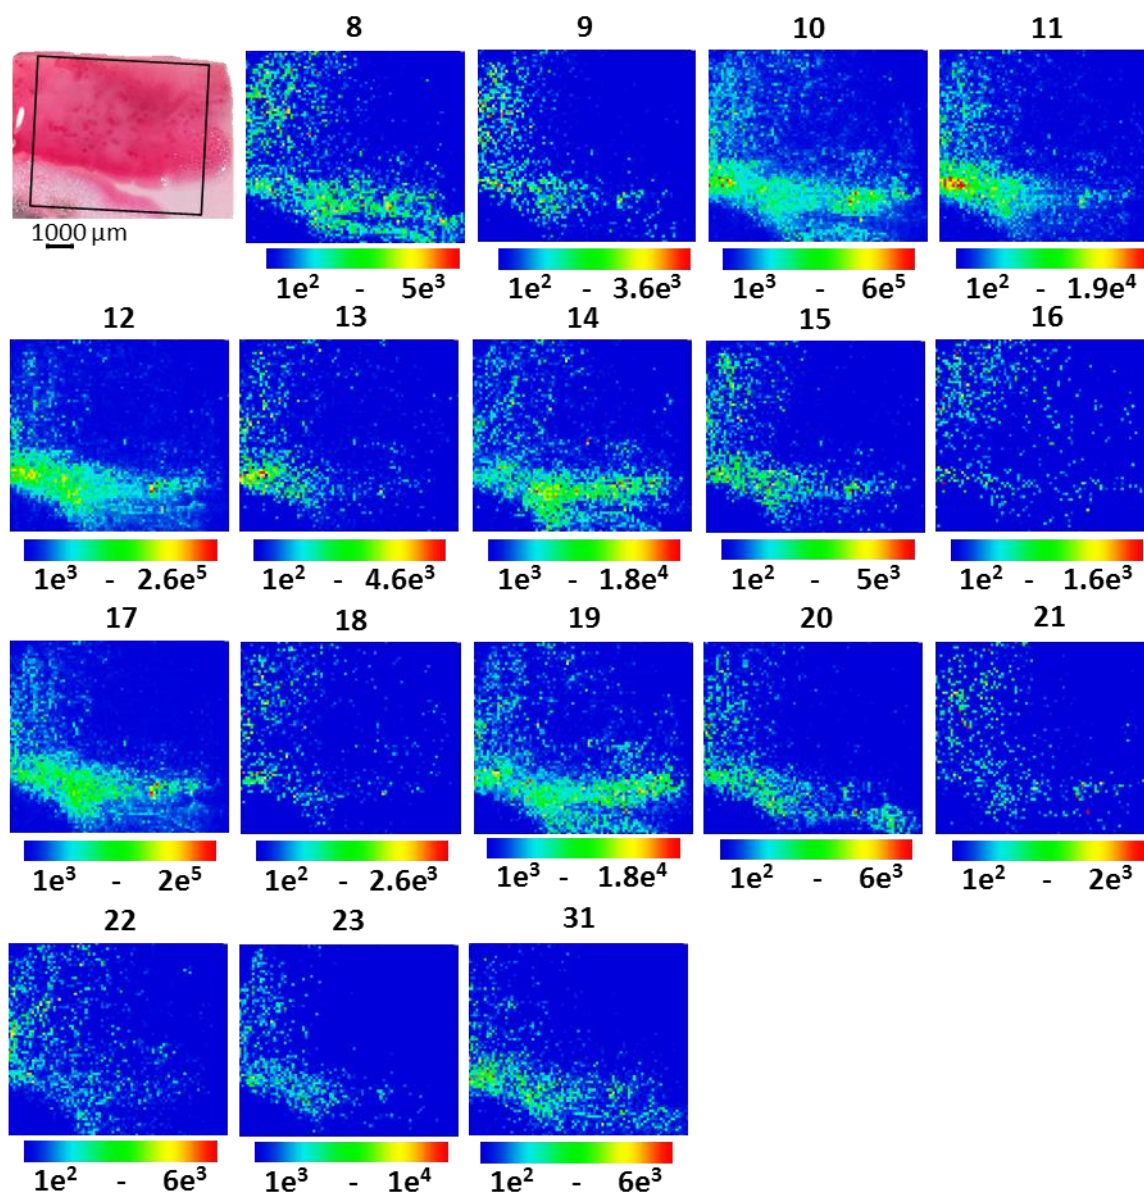

**Fig. S218.** MALDI-imaging-HRMS of the co-cultivation of bacterial endophyte *S. marcescens* MSRBB2 and fungal endophyte *A. caesiellus* after 7 days. Optical image with assigned scan area and localization of serratamolides ( $[M+K]^+ \pm 2$  ppm).

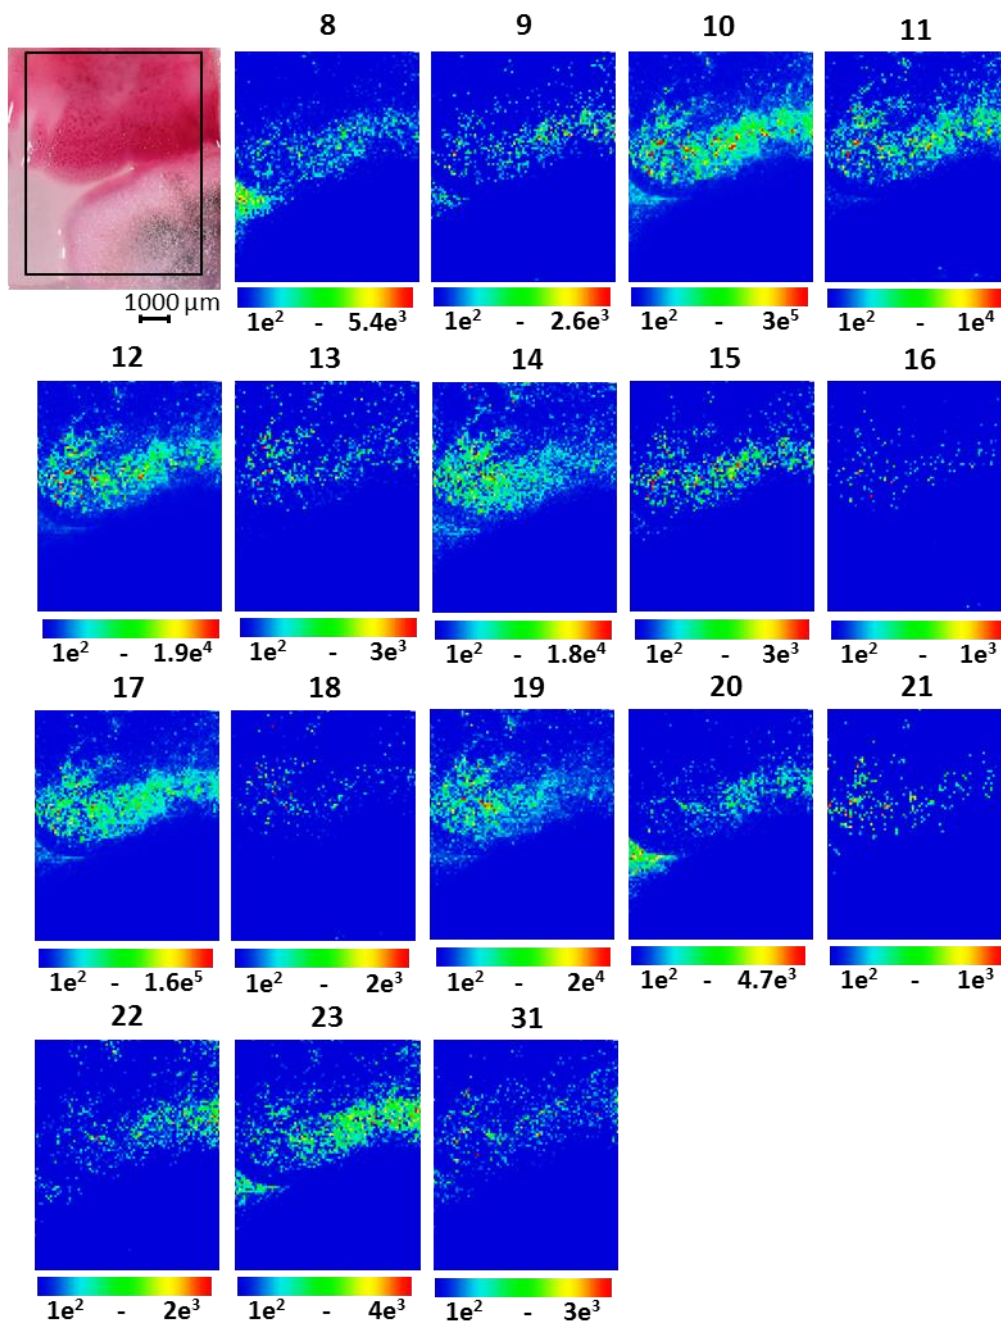

**Fig. S219.** MALDI-imaging-HRMS of solo cultivation of bacterial endophyte *S. marcescens* MSRBB2 after 7 days. Optical image with assigned scan area and localization of serratamolides ( $[M+K]^+ \pm 2$  ppm).

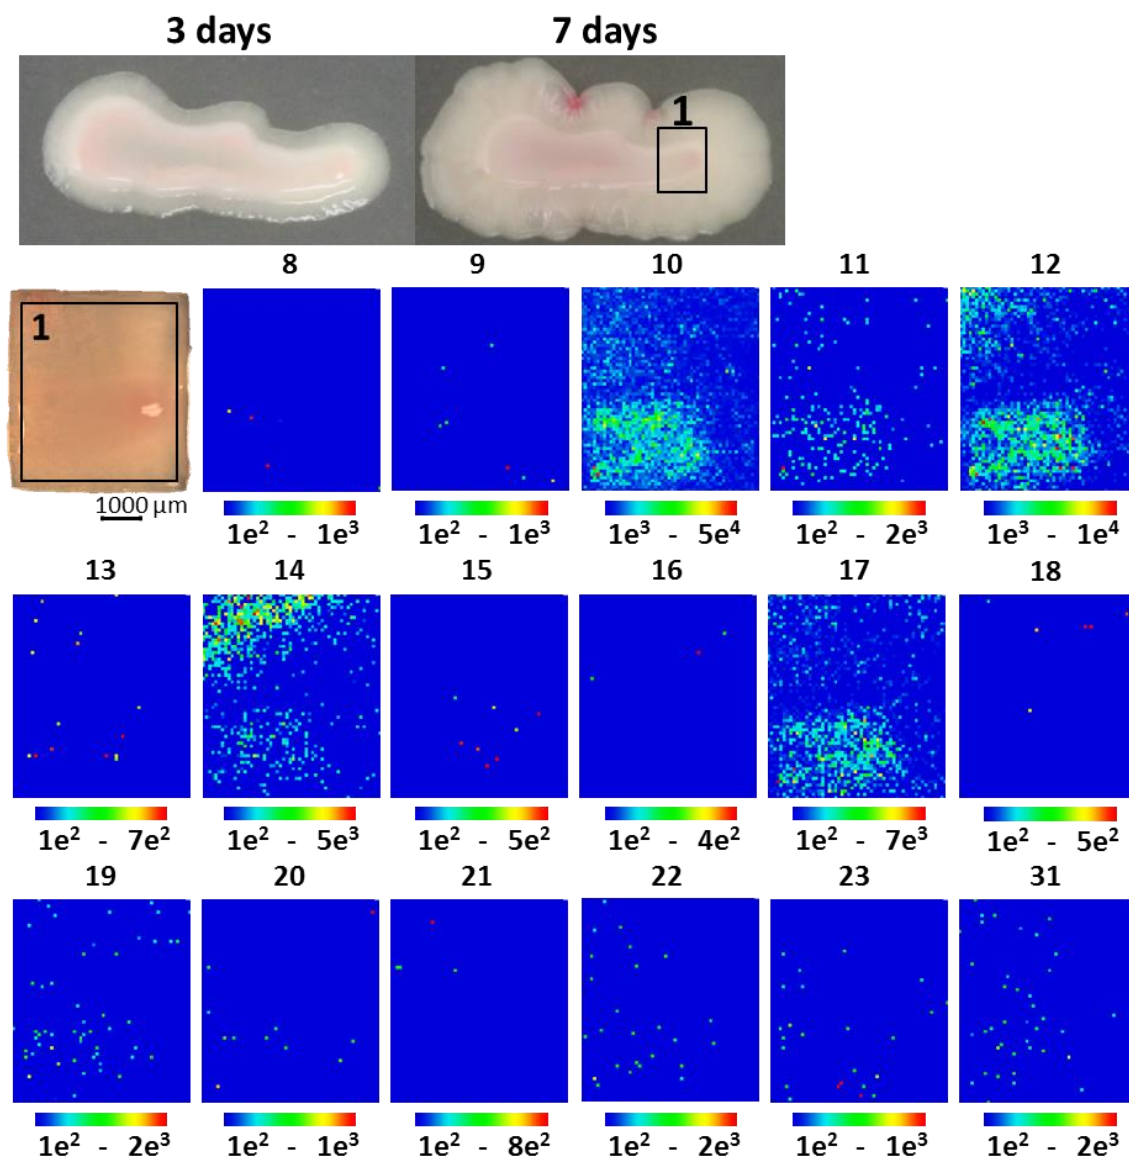

**Fig. S220.** MALDI-imaging-HRMS of solo cultivation of bacterial endophyte *S. marcescens* MSRBB2 after 7 days. Optical image with assigned scan area and localization of serratamolides ( $[M+K]^+ \pm 2$  ppm).

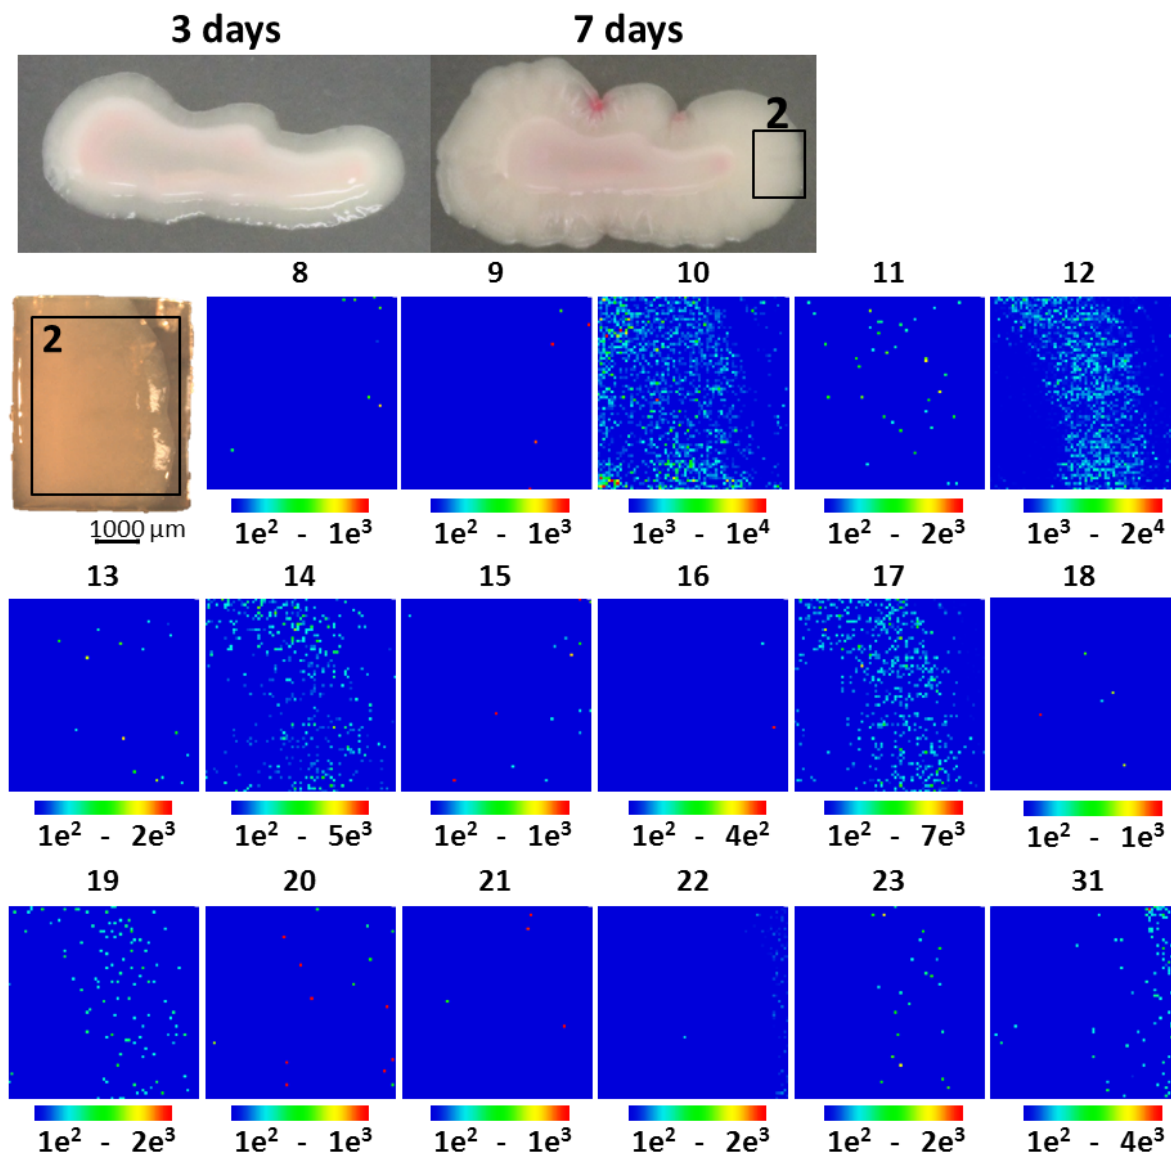



**Fig. S221.** Possible decomposition of serratamolides by hydrolysis resulting in open-ring serratamolides and/ or “monomers”.

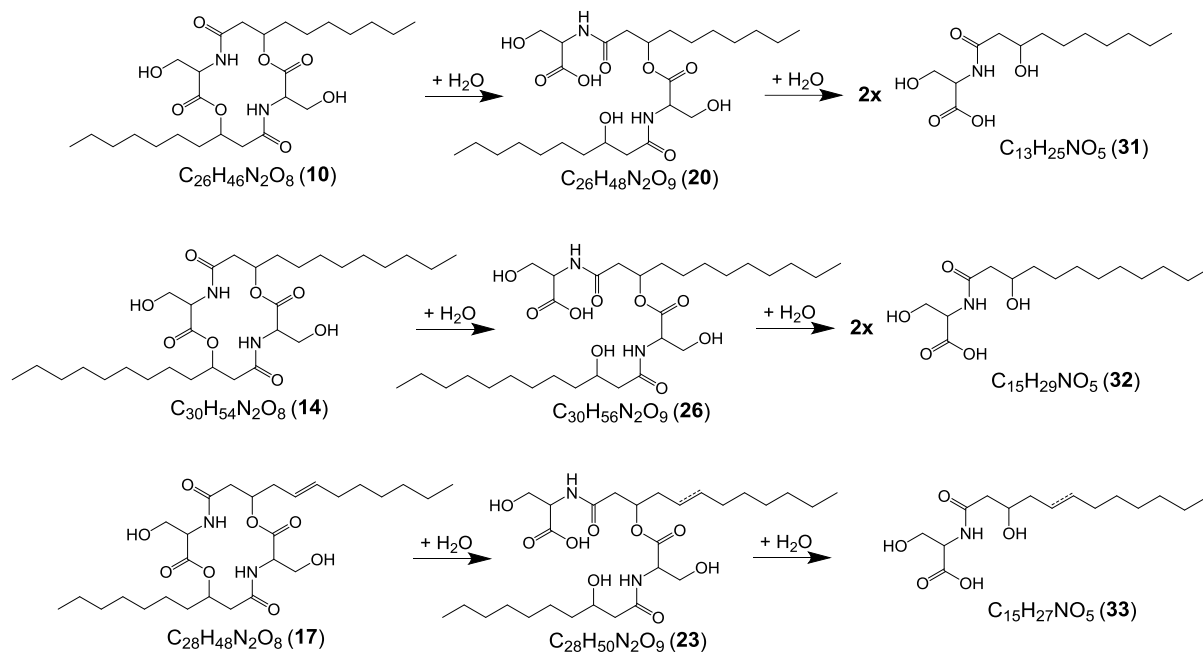

**Fig. S222.** Digital microscope images of leaf puncture bioassay of *M. canariensis*, *M. heterophylla*, and *M. senegalensis* against prodigiosin (B) and serrawettin W1 (C) after 6 days (Scale bar = 500  $\mu$ m; Blank (A)).

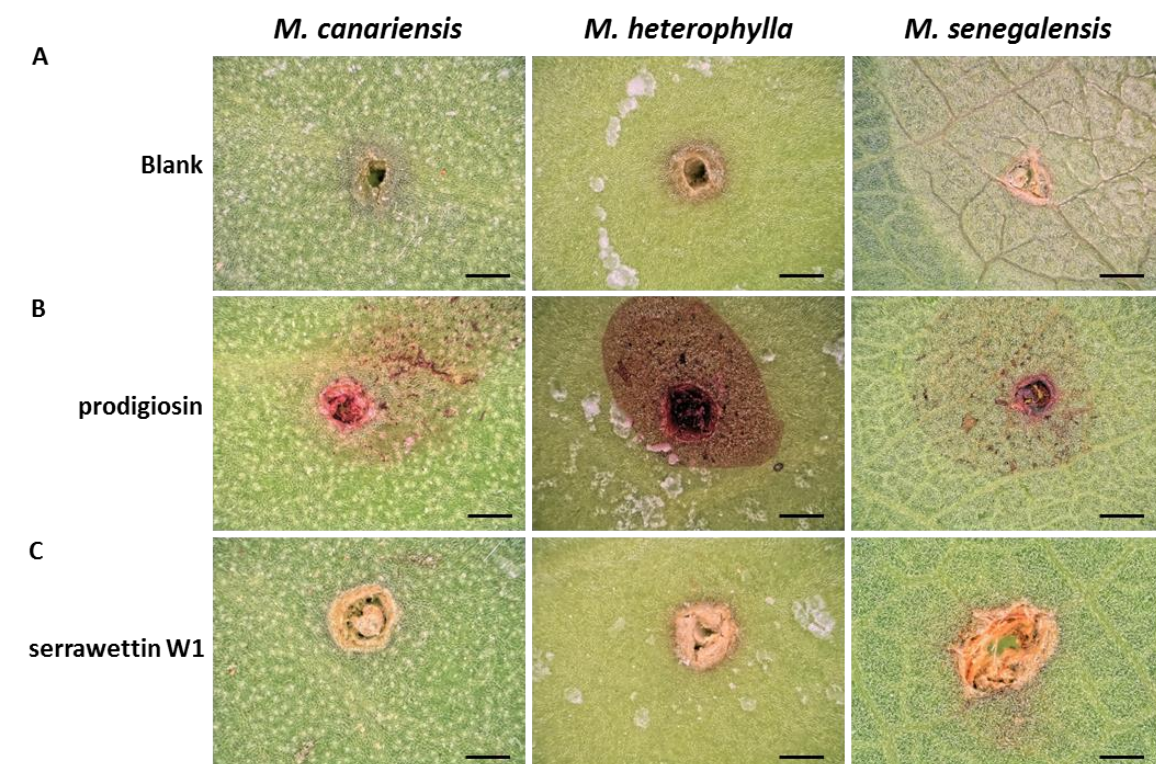

**Fig. S223.** Isolation of endophytic *S. marcescens* MSRBB2 from *M. serrata* stem. Primary isolation plate (A) along with magnification (C) and spread axenic isolate (B).

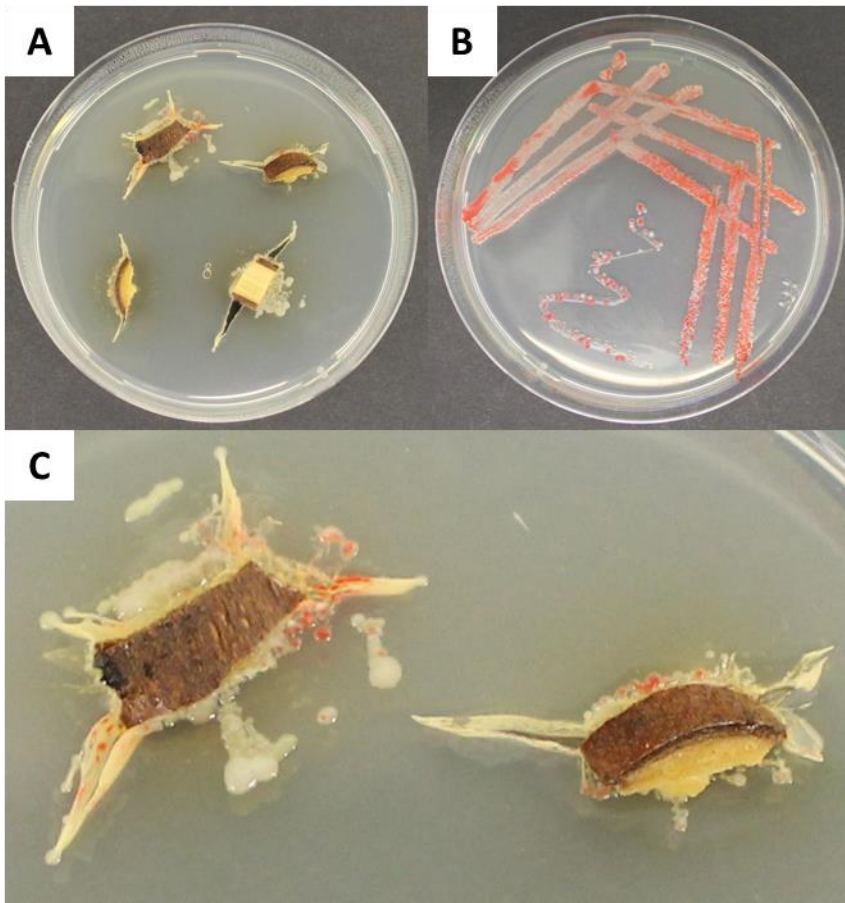

**Fig. S224.** Microscopic images of endophytic fungi *Pichia* spp. (A), *A. caesiellus* (B), and *P. virgatula* (C) isolated from *M. serrata*.

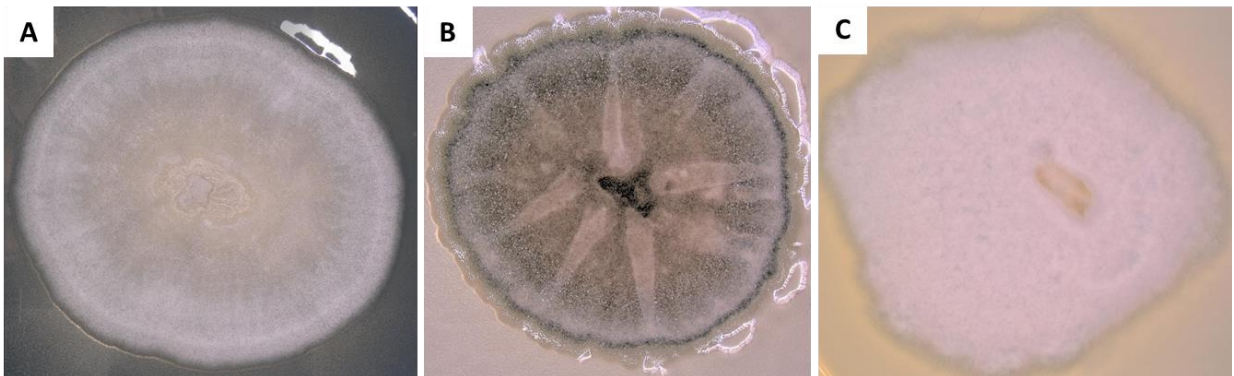

## II. SUPPLEMENTARY TABLES

**Table S1.** Peak height ratios from high resolution mass spectrometry of serratamolides labeled with [1,2-<sup>13</sup>C<sub>2</sub>]-sodium acetate (n.d. = not detected; \* = observed peak height in % of M+4).

| No. | Sum formula<br>[M+H]                                          | Observed peak height (% of M) |      |      |      |      |      |      |      |      |      |      |      |
|-----|---------------------------------------------------------------|-------------------------------|------|------|------|------|------|------|------|------|------|------|------|
|     |                                                               | M+2                           | M+4  | M+6  | M+8  | M+10 | M+12 | M+14 | M+16 | M+18 | M+20 | M+22 | M+24 |
| 8   | C <sub>24</sub> H <sub>43</sub> N <sub>2</sub> O <sub>8</sub> | n.d.                          | 100* | 139  | 228  | 127  | n.d. | n.d. | n.d. | n.d. | n.d. | n.d. | n.d. |
| 9   | C <sub>25</sub> H <sub>45</sub> N <sub>2</sub> O <sub>8</sub> | 248                           | 648  | 1139 | 857  | 423  | 115  | n.d. | n.d. | n.d. | n.d. | n.d. | n.d. |
| 10  | C <sub>26</sub> H <sub>47</sub> N <sub>2</sub> O <sub>8</sub> | 140                           | 334  | 603  | 783  | 763  | 554  | 295  | 118  | 31   | 3    | n.d. | n.d. |
| 11  | C <sub>27</sub> H <sub>49</sub> N <sub>2</sub> O <sub>8</sub> | 323                           | 634  | 1077 | 1090 | 891  | 466  | 198  | n.d. | n.d. | n.d. | n.d. | n.d. |
| 12  | C <sub>28</sub> H <sub>51</sub> N <sub>2</sub> O <sub>8</sub> | 80                            | 205  | 390  | 556  | 606  | 518  | 344  | 176  | 65   | 16   | 1    | n.d. |
| 13  | C <sub>29</sub> H <sub>53</sub> N <sub>2</sub> O <sub>8</sub> | 111                           | 139  | 616  | 737  | 678  | 344  | 168  | 30   | n.d. | n.d. | n.d. | n.d. |
| 14  | C <sub>30</sub> H <sub>55</sub> N <sub>2</sub> O <sub>8</sub> | 33                            | 88   | 215  | 312  | 386  | 363  | 285  | 171  | 82   | 27   | 1    | n.d. |
| 15  | C <sub>26</sub> H <sub>45</sub> N <sub>2</sub> O <sub>8</sub> | n.d.                          | n.d. | n.d. | n.d. | n.d. | n.d. | n.d. | n.d. | n.d. | n.d. | n.d. | n.d. |
| 16  | C <sub>27</sub> H <sub>47</sub> N <sub>2</sub> O <sub>8</sub> | n.d.                          | n.d. | n.d. | n.d. | n.d. | n.d. | n.d. | n.d. | n.d. | n.d. | n.d. | n.d. |
| 17  | C <sub>28</sub> H <sub>49</sub> N <sub>2</sub> O <sub>8</sub> | 116                           | 324  | 631  | 889  | 984  | 848  | 571  | 294  | 109  | 20   | 1    | n.d. |
| 18  | C <sub>29</sub> H <sub>51</sub> N <sub>2</sub> O <sub>8</sub> | 93                            | 80   | 100  | 241  | 218  | n.d. | n.d. | n.d. | n.d. | n.d. | n.d. | n.d. |
| 19  | C <sub>30</sub> H <sub>53</sub> N <sub>2</sub> O <sub>8</sub> | 37                            | 151  | 323  | 504  | 591  | 599  | 477  | 303  | 126  | 31   | 3    | 4    |
| 20  | C <sub>26</sub> H <sub>49</sub> N <sub>2</sub> O <sub>9</sub> | 113                           | 279  | 491  | 647  | 631  | 474  | 265  | 108  | 27   | 4    | n.d. | n.d. |
| 21  | C <sub>27</sub> H <sub>51</sub> N <sub>2</sub> O <sub>9</sub> | 161                           | 474  | 865  | 1086 | 1040 | 776  | 416  | 163  | 45   | 5    | 1    | n.d. |
| 22  | C <sub>28</sub> H <sub>53</sub> N <sub>2</sub> O <sub>9</sub> | 76                            | 205  | 369  | 524  | 573  | 481  | 329  | 165  | 62   | 16   | 1    | n.d. |
| 23  | C <sub>28</sub> H <sub>51</sub> N <sub>2</sub> O <sub>9</sub> | 81                            | 217  | 414  | 602  | 686  | 595  | 409  | 209  | 76   | 5    | 1    | n.d. |
| 24  | C <sub>25</sub> H <sub>47</sub> N <sub>2</sub> O <sub>9</sub> | 448                           | 736  | 1132 | 1206 | 773  | 129  | n.d. | n.d. | n.d. | n.d. | n.d. | n.d. |
| 25  | C <sub>29</sub> H <sub>55</sub> N <sub>2</sub> O <sub>9</sub> | 343                           | 718  | 983  | 1067 | 924  | 597  | 318  | 118  | 25   | 1    | n.d. | n.d. |
| 26  | C <sub>30</sub> H <sub>57</sub> N <sub>2</sub> O <sub>9</sub> | 43                            | 117  | 233  | 333  | 404  | 400  | 314  | 189  | 89   | 30   | 2    | n.d. |
| 27  | C <sub>31</sub> H <sub>59</sub> N <sub>2</sub> O <sub>9</sub> | 142                           | 978  | 1805 | 3971 | 4689 | 4343 | 3218 | 2286 | 246  | 54   | n.d. | n.d. |
| 28  | C <sub>29</sub> H <sub>53</sub> N <sub>2</sub> O <sub>9</sub> | 209                           | 559  | 1173 | 1634 | 1847 | 1561 | 1034 | 577  | 198  | 54   | 5    | n.d. |
| 29  | C <sub>30</sub> H <sub>55</sub> N <sub>2</sub> O <sub>9</sub> | 34                            | 98   | 197  | 327  | 383  | 367  | 307  | 188  | 90   | 27   | 6    | n.d. |
| 30  | C <sub>31</sub> H <sub>57</sub> N <sub>2</sub> O <sub>9</sub> | 50                            | 183  | 668  | 1099 | 1381 | 1429 | 1112 | 610  | 305  | 16   | n.d. | n.d. |
| 31  | C <sub>13</sub> H <sub>26</sub> NO <sub>5</sub>               | 207                           | 328  | 273  | 115  | 21   | n.d. | -    | -    | -    | -    | -    | -    |
| 32  | C <sub>15</sub> H <sub>30</sub> NO <sub>5</sub>               | 166                           | 287  | 295  | 189  | 80   | 13   | n.d. | -    | -    | -    | -    | -    |
| 33  | C <sub>15</sub> H <sub>28</sub> NO <sub>5</sub>               | 170                           | 329  | 365  | 245  | 96   | 15   | n.d. | -    | -    | -    | -    | -    |

## III. REFERENCES

[1] Agrawal, T. & Kotasthane, A. S. Chitinolytic assay of indigenous *Trichoderma* isolates collected from different geographical locations of Chhattisgarh in Central India. *SpringerPlus* 1:73 (2012).
